# Supplementary material
Source: PubMed Central journal article supplement (PMC7098644)
Supplement: NIHMS1540634-supplement-1.pdf [file NIHMS1540634-supplement-1.pdf]

# Supplementary Information

## Modular and Regioselective Synthesis of All-carbon Tetrasubstituted Olefins Enabled by An Alkenyl Catellani Reaction

Jianchun Wang<sup>1</sup>, Zhe Dong<sup>1</sup>, Cheng Yang<sup>1</sup> and Guangbin Dong\*<sup>1</sup>

<sup>1</sup> Department of Chemistry, University of Chicago, Chicago, Illinois 60637, United States

### Table of Contents

|                                                                             |     |
|-----------------------------------------------------------------------------|-----|
| I. General Information.....                                                 | 2   |
| II. Experimental Procedure and Characterization Data.....                   | 3   |
| Preparation of modified norbornenes:.....                                   | 3   |
| Preparation of vinyl halides or triflates:.....                             | 7   |
| General procedure for Pd/NBE-catalyzed alkenyl Catellani reaction.....      | 14  |
| General procedure for acyclic vinyl bromide substrates.....                 | 29  |
| Characterization of a typical side-product.....                             | 38  |
| III. Kinetic Studies.....                                                   | 41  |
| General method.....                                                         | 41  |
| Dependence of initial rate on <b>5a</b> .....                               | 41  |
| Dependence of initial rate on <b>2a</b> .....                               | 43  |
| Dependence of initial rate on <b>3a</b> .....                               | 44  |
| Dependence of initial rate on <b>N11</b> .....                              | 46  |
| Dependence of initial rate on Pd/ <b>L1</b> .....                           | 47  |
| Dependence of initial rate for side-product <b>4a''</b> on <b>N11</b> ..... | 49  |
| Measurement of the kinetic isotopic effect (KIE):.....                      | 52  |
| Identification of the actual ligand:.....                                   | 58  |
| IV. Spectra.....                                                            | 60  |
| V. X-ray Data.....                                                          | 136 |
| VI. References.....                                                         | 137 |

## I. General Information

Unless noted otherwise, all solvents were dried by filtration through a Pure-Solv MD-5 Solvent Purification System (Innovative Technology). 1,4-dioxane and toluene were distilled freshly over sodium. Reaction temperatures were reported as the temperatures of the bath surrounding the flasks or vials. Sensitive reagents and solvents were transferred under nitrogen into a nitrogen-filled glovebox with standard techniques. Cesium carbonate was purchased from Strem and stored in the glovebox. Analytical thin-layer chromatography (TLC) was carried out using 0.2 mm commercial silica gel plates (silica gel 60, F254, EMD chemical). Vials (15 x 45 mm 1 dram (4 mL) / 17 x 60 mm 3 dram (7.5 mL) with PTFE lined cap attached) were purchased from Qorpak and flame-dried prior to use. Mass spectra were recorded on an Agilent 6530 LC Q-TOF mass spectrometer using electrospray ionization with fragmentation voltage set at 115 V and processed with an Agilent MassHunter Operating System. X-ray diffraction data were collected at 100(2) K on a Bruker-Nonius Kappa CCD or Agilent SuperNova AtlasS2 CCD. Infrared spectra were recorded on a Nicolet 380 FTIR using neat thin film technique. Nuclear magnetic resonance spectra ( $^1\text{H}$  NMR and  $^{13}\text{C}$  NMR) were recorded with a Bruker Model DMX 500 or 400. Chemical shifts are reported in parts per million (ppm,  $\delta$ ), downfield from tetramethylsilane (TMS,  $\delta=0.00\text{ppm}$ ) and are referenced to residual solvent ( $\text{CDCl}_3$ ,  $\delta=7.26\text{ ppm}$  ( $^1\text{H}$ ) and  $77.00\text{ ppm}$  ( $^{13}\text{C}$ )). Coupling constants were reported in Hertz (Hz). Data for  $^1\text{H}$  NMR spectra were reported as follows: chemical shift (ppm, referenced to protium, s = singlet, d = doublet, t = triplet, q = quartet, quin = quintet, dd = doublet of doublets, td = triplet of doublets, ddd = doublet of doublet of doublets, m = multiplet, coupling constant (Hz), and integration). All other materials were obtained from Aldrich Chemical Company or Combi-blocks and were used as received.

## II. Experimental Procedure and Characterization Data

### Preparation of modified norbornenes:

**N2**,<sup>1</sup> **N3**,<sup>2</sup> **N4**,<sup>3</sup> **N5**,<sup>4</sup> **N6**,<sup>4</sup> **N7**,<sup>4</sup> **N8**<sup>4</sup> and **N9**<sup>4</sup> were known compounds and were synthesized according to reported procedures.

**N10** – **N17** were synthesized according to the following procedures.

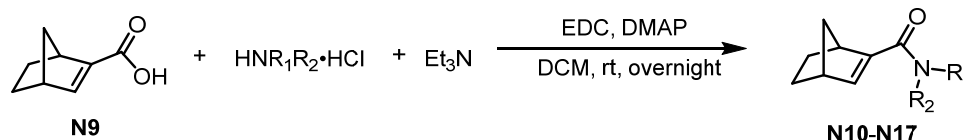

**N9** (1 g, 7.2 mmol, 1.0 equiv), amine hydrochloride (14.4 mmol, 2.0 equiv), 1-ethyl-3-(3-dimethylaminopropyl)carbodiimide hydrochloride (2.07 g, 10.8 mmol, 1.2 equiv), triethylamine (4 mL, 28.8 mmol, 4.0 equiv.), and 4-dimethylaminopyridine (12.2 mg, 0.72 mmol, 0.1 equiv.) were dissolved in dichloromethane (30 mL). The reaction mixture was stirred at room temperature overnight. Then it was diluted with diethyl ether, washed with water and brine, dried over  $\text{MgSO}_4$ , and purified on silica gel chromatography (hexanes/ethyl acetate = 2:1) to afford norbornenes **N10** – **N17** as the product.

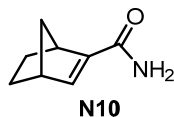

**N10**: White solid. Melting point = 158–159 °C. (2.0 mmol scale, 123 mg, 45% yield).  $R_f$  = 0.20 (hexane/ethyl acetate = 1:1).  $^1\text{H NMR}$  (400 MHz, Chloroform-*d*)  $\delta$  6.62 (d,  $J$  = 3.0 Hz, 1H), 5.79 – 5.23 (br, 2H), 3.11 (s, 1H), 2.95 (s, 1H), 1.79 – 1.64 (m, 2H), 1.51 – 1.39 (m, 1H), 1.15 (d,  $J$  = 8.4 Hz, 1H), 1.11 – 1.00 (m, 2H).  $^{13}\text{C NMR}$  (101 MHz, Chloroform-*d*)  $\delta$  143.25, 142.18, 48.26, 43.45, 42.25, 24.92, 24.59 (the amide carbonyl signal cannot be located). **IR** (KBr,  $\text{cm}^{-1}$ ):  $\nu$  3365, 3186, 2958, 2868, 1653, 1621, 1582, 1406. **HRMS** (ESI): Calcd for  $\text{C}_8\text{H}_{12}\text{NO}^+$  ( $\text{M}+\text{H}^+$ ): 138.0913, found: 138.0909.

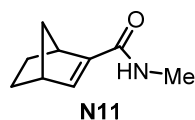

**N11**: White solid. Melting point = 111–112 °C. (7.2 mmol scale, 740 mg, 68% yield).  $R_f$  = 0.35 (hexane/ethyl acetate = 1:1).  $^1\text{H NMR}$  (400 MHz, Chloroform-*d*)  $\delta$  6.60 (s, 1H), 6.20 – 5.76 (br, 1H), 3.13 (s, 1H), 2.96 (s, 1H), 2.82 (dd,  $J$  = 12.3, 4.9 Hz, 3H), 1.78 – 1.62 (m, 2H), 1.50 – 1.38 (m, 1H), 1.16 (t,  $J$  = 9.2 Hz, 1H), 1.12 – 0.97 (m, 2H).  $^{13}\text{C NMR}$  (101 MHz, Chloroform-*d*)  $\delta$  165.64, 143.91, 140.40, 48.30, 43.18, 42.12, 26.12, 25.01, 24.69. **IR** (KBr,  $\text{cm}^{-1}$ ):  $\nu$  2951, 2871, 1625, 1587, 1497, 1394, 1272, 1153, 1052. **HRMS** (ESI): Calcd for  $\text{C}_{10}\text{H}_{16}\text{NO}^+$  ( $\text{M}+\text{H}^+$ ): 166.1226, found: 166.1235.

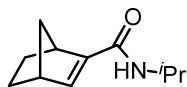

**N12**

**N12**: White solid. Melting point = 156–157 °C. (2.0 mmol scale, 260 mg, 73% yield).  $R_f$  = 0.45 (hexane/ethyl acetate = 1:1).  $^1\text{H NMR}$  (400 MHz, Chloroform-*d*)  $\delta$  6.62 (d,  $J$  = 3.1 Hz, 1H), 5.46 (s, 1H), 4.29 – 4.01 (m, 1H), 3.15 (s, 1H), 3.00 (s, 1H), 1.81 – 1.70 (m, 2H), 1.50 (dt,  $J$  = 8.4, 2.1 Hz, 1H), 1.20 (d,  $J$  = 3.3 Hz, 3H), 1.19 (d,  $J$  = 3.4 Hz, 3H), 1.15 – 1.08 (m, 2H).  $^{13}\text{C NMR}$  (101 MHz, Chloroform-*d*)  $\delta$  164.05, 144.24, 140.10, 48.32, 43.19, 42.16, 41.10, 25.07, 24.72, 22.93, 22.91. **IR** (KBr,  $\text{cm}^{-1}$ ):  $\nu$  3322, 2971, 2874, 179, 1637, 1526, 1458, 1280. **HRMS** (ESI): Calcd for  $\text{C}_{11}\text{H}_{18}\text{NO}^+$  ( $\text{M}+\text{H}^+$ ): 180.1383, found: 180.1393.

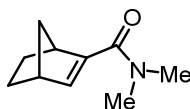

**N13**

**N13**: Colorless oil. (2.0 mmol scale, 280 mg, 85% yield).  $R_f$  = 0.40 (hexane/ethyl acetate = 1:1).  $^1\text{H NMR}$  (400 MHz, Chloroform-*d*)  $\delta$  6.20 (s, 1H), 3.23 – 2.90 (m, 8H), 1.80 – 1.68 (m, 2H), 1.44 (dq,  $J$  = 6.3, 1.9 Hz, 1H), 1.35 (t,  $J$  = 8.5 Hz, 1H), 1.16 (d,  $J$  = 8.4 Hz, 1H), 1.11 (t,  $J$  = 9.5 Hz, 1H).  $^{13}\text{C NMR}$  (101 MHz, Chloroform-*d*)  $\delta$  168.44, 142.72, 138.38, 47.18, 44.95, 43.58, 38.64, 35.07, 25.27, 25.25. **IR** (KBr,  $\text{cm}^{-1}$ ):  $\nu$  2951, 2871, 1625, 1587, 1497, 1394, 1272, 1153, 1052. **HRMS** (ESI): Calcd for  $\text{C}_{10}\text{H}_{16}\text{NO}^+$  ( $\text{M}+\text{H}^+$ ): 166.1226, found: 166.1235.

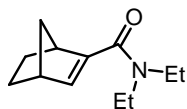

**N14**



**N14:** Colorless oil. (2.0 mmol scale, 242 mg, 63% yield, using diethylamine directly instead of corresponding hydrochloride salt).  $R_f = 0.40$  (hexane/ethyl acetate = 1:1).  $^1\text{H NMR}$  (400 MHz, Chloroform-*d*)  $\delta$  6.14 (d,  $J = 3.1$  Hz, 1H), 3.59 – 3.44 (m, 2H), 3.41 – 3.24 (m, 2H), 3.15 (s, 1H), 3.00 (s, 1H), 1.80 – 1.68 (m, 2H), 1.50 – 1.34 (m, 2H), 1.22 – 1.09 (m, 8H).  $^{13}\text{C NMR}$  (101 MHz, Chloroform-*d*)  $\delta$  168.46, 143.15, 135.73, 47.28, 45.36, 43.44, 42.61, 39.23, 25.40, 25.27, 14.83, 12.85. **IR** (KBr,  $\text{cm}^{-1}$ ):  $\nu$  2972, 2872, 1623, 1586, 1426, 1285, 1064. **HRMS** (ESI): Calcd for  $\text{C}_{12}\text{H}_{20}\text{NO}^+$  ( $\text{M}+\text{H}^+$ ): 194.1539, found: 194.1547.

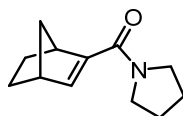

**N15**

**N15:** Colorless oil. (2.0 mmol scale, 230 mg, 60% yield, using pyrrolidine directly instead of corresponding hydrochloride salt).  $R_f = 0.45$  (hexane/ethyl acetate = 1:1).  $^1\text{H NMR}$  (400 MHz, Chloroform-*d*)  $\delta$  6.33 (s, 1H), 3.70 – 3.35 (m, 4H), 3.28 (s, 1H), 3.01 (s, 1H), 2.06 – 1.78 (m, 4H), 1.79 – 1.68 (m, 2H), 1.48 – 1.36 (m, 1H), 1.34 – 1.19 (m, 1H), 1.19 – 1.00 (m, 2H).  $^{13}\text{C NMR}$  (101 MHz, Chloroform-*d*)  $\delta$  165.82, 144.33, 139.33, 48.27, 47.08, 47.05, 46.17, 44.26, 44.24, 43.71, 43.69, 26.46, 25.21, 25.19, 25.08, 25.06, 24.08. **IR** (KBr,  $\text{cm}^{-1}$ ):  $\nu$  2968, 2871, 1616, 1578, 1425, 1312. **HRMS** (ESI): Calcd for  $\text{C}_{12}\text{H}_{18}\text{NO}^+$  ( $\text{M}+\text{H}^+$ ): 192.1383, found: 192.1392.

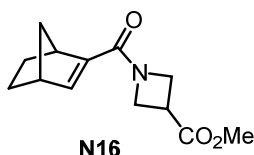

**N16**

**N16:** Colorless oil. (2.0 mmol scale, 315 mg, 67% yield).  $R_f = 0.35$  (hexane/ethyl acetate = 1:1).  $^1\text{H NMR}$  (400 MHz, Chloroform-*d*)  $\delta$  6.34 (d,  $J = 3.1$  Hz, 1H), 4.50 – 4.01 (m, 4H), 3.69 (s, 3H), 3.38 (p,  $J = 7.6$  Hz, 1H), 3.20 (s, 1H), 2.94 (s, 1H), 1.72 – 1.62 (m, 2H), 1.35 (s, 1H), 1.14 – 1.04 (m, 2H), 1.04 – 0.88 (m, 1H).  $^{13}\text{C NMR}$  (101 MHz, Chloroform-*d*)  $\delta$  141.85, 54.35, 52.39, 51.05, 47.54, 43.62, 42.72, 32.84, 24.78, 24.68. **IR** (KBr,  $\text{cm}^{-1}$ ):  $\nu$  2955, 2873, 1736, 1626, 1578, 1432, 1361, 1206, 1178. **HRMS** (ESI): Calcd for  $\text{C}_{13}\text{H}_{18}\text{NO}_3^+$  ( $\text{M}+\text{H}^+$ ): 236.1281, found: 236.1293.

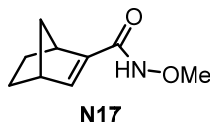

**N17**: White solid. Melting point = 87–88 °C. (2.0 mmol scale, 267 mg, 80% yield).  $R_f$  = 0.45 (hexane/ethyl acetate = 1:1).  $^1\text{H NMR}$  (400 MHz, Chloroform- $d$ )  $\delta$  8.30 (s, 1H), 6.74 (d,  $J$  = 3.2 Hz, 1H), 3.82 (s, 3H), 3.18 (s, 1H), 3.03 (s, 1H), 1.87 – 1.70 (m, 2H), 1.54 – 1.46 (m, 1H), 1.24 (d,  $J$  = 8.6 Hz, 1H), 1.19 – 1.06 (m, 2H).  $^{13}\text{C NMR}$  (101 MHz, Chloroform- $d$ )  $\delta$  142.61, 140.76, 64.63, 48.24, 43.21, 42.08, 24.82, 24.66. **IR** (KBr,  $\text{cm}^{-1}$ ):  $\nu$  3191, 2969, 2871, 1648, 1597, 1499, 1300, 1045. **HRMS** (ESI): Calcd for  $\text{C}_9\text{H}_{14}\text{NO}_2^+$  ( $\text{M}+\text{H}^+$ ): 168.1019, found: 168.1013.

**N18** was synthesized according to the following procedure:

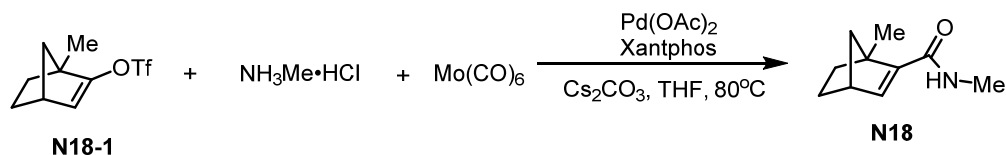

An oven-dried 4.0 mL vial was charged with **N18-1**<sup>2</sup> (28.6 mg, 0.1 mmol, 1.0 equiv.),  $\text{Mo}(\text{CO})_6$  (13.2 mg, 0.05 mmol, 0.5 equiv.), methylamine hydrochloride (13.5 mg, 0.2 mmol, 2.0 equiv.),  $\text{Pd}(\text{OAc})_2$  (0.6 mg, 0.0025 mmol, 2.5 mol%), Xantphos (2.9 mg, 0.005 mg, 5.0 mol%) and  $\text{Cs}_2\text{CO}_3$  (97.8 mg, 0.3 mmol, 3.0 equiv.). The vial was partially capped and transferred in a nitrogen-filled glovebox. In the glovebox, tetrahydrofuran (1 mL) was added and the vial was tightly sealed, transferred out of glovebox and stirred on a pie-block preheated to 80 °C for 5 h. Upon completion of the reaction, the mixture was filtered through a thin pad of silica gel. The filter cake was washed with ethyl acetate, and the combined filtrate was concentrated. The residue was purified by flash column chromatography on silica gel to yield the desired product.

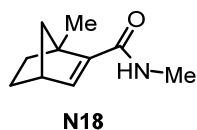

**N18**: White solid. Melting point = 77–78 °C. (0.1 mmol scale, 10 mg, 61% yield).  $R_f = 0.30$  (hexane/ethyl acetate = 1:1).  **$^1\text{H NMR}$**  (400 MHz, Chloroform-*d*)  $\delta$  6.33 (d,  $J = 3.1$  Hz, 1H), 5.55 (s, 1H), 2.79 – 2.73 (m, 4H), 1.87 – 1.76 (m, 1H), 1.48 – 1.37 (m, 4H), 1.30 – 1.20 (m, 2H), 1.14 – 1.06 (m, 1H), 1.04 (d,  $J = 8.2$  Hz, 1H).  **$^{13}\text{C NMR}$**  (101 MHz, Chloroform-*d*)  $\delta$  167.47, 146.46, 139.45, 54.34, 50.95, 42.20, 32.08, 28.18, 25.91, 17.49. **IR** (KBr,  $\text{cm}^{-1}$ ):  $\nu$  3314, 2950, 2867, 1642, 1583, 1534, 1409, 1296. **HRMS** (ESI): Calcd for  $\text{C}_{10}\text{H}_{16}\text{NO}^+$  ( $\text{M}+\text{H}^+$ ): 166.1226, found: 166.1231.

*Preparation of vinyl halides or triflates:*

**5a**,<sup>5</sup> **5q**,<sup>6</sup> **5r**,<sup>7</sup> **5s**,<sup>8</sup> **5t**,<sup>9</sup> **5x**,<sup>10</sup> **5y**,<sup>11</sup> **5z**,<sup>12</sup> **5aa**,<sup>13</sup> **5ab**,<sup>14</sup> **5ac**,<sup>15</sup> **5ad**,<sup>16</sup> **5ae**,<sup>17</sup> and **5af**<sup>12</sup> are known compounds and were synthesized according to reported procedures. **5ag** was purchased from Sigma-Aldrich.

**5u** was synthesized by the following procedure:

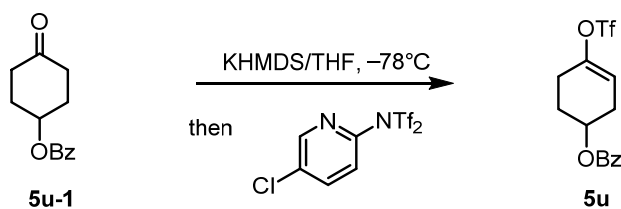

To the solution of KHMDS (1.60 g, 8.05 mmol, 1.15 equiv.) in anhydrous THF (10 mL) was slowly added a solution of **5u-1**<sup>18</sup> (1.52 g, 7.0 mmol, 1.0 equiv.) in anhydrous THF (15 mL) at  $-78^\circ\text{C}$ . After 1 h at  $-78^\circ\text{C}$  under a nitrogen atmosphere, a solution of Comin's reagent (3.03 g, 7.7 mmol, 1.1 equiv.) in anhydrous THF (15 mL) was slowly added to the reaction mixture at  $-78^\circ\text{C}$ . The solution mixture was allowed to warm to room temperature over 1 h and stirred for additional 3 h. The resulting solution was treated with saturated aqueous  $\text{NaHCO}_3$  (20 mL) and extracted with  $\text{Et}_2\text{O}$  ( $3 \times 20$  mL). The combined organic extracts were washed with brine (20 mL), dried over anhydrous  $\text{MgSO}_4$ , filtered, and the solvent was removed in vacuo. The resulting crude product was purified by column chromatography.

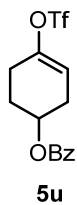

**5u**: Colorless oil. (7.0 mmol scale, 1.37 g, 56% yield).  $R_f = 0.25$  (hexane/ethyl acetate = 10:1).  $^1\text{H NMR}$  (400 MHz, Chloroform-*d*)  $\delta$  7.84 – 7.79 (m, 2H), 7.40 – 7.33 (m, 1H), 7.24 (ddd,  $J = 8.0, 6.8, 1.1$  Hz, 2H), 5.54 (ddt,  $J = 5.0, 2.9, 1.5$  Hz, 1H), 5.15 (dtd,  $J = 7.1, 4.5, 2.6$  Hz, 1H), 2.50 – 2.35 (m, 2H), 2.34 – 2.19 (m, 2H), 2.05 – 1.92 (m, 1H), 1.91 – 1.76 (m, 1H).  $^{13}\text{C NMR}$  (101 MHz, Chloroform-*d*)  $\delta$  165.84, 148.14, 133.18, 130.10, 129.60, 128.45, 118.54 (q,  $J = 320.3$  Hz), 115.16, 66.86, 29.45, 26.88, 24.43. **IR** (KBr,  $\text{cm}^{-1}$ ):  $\nu$  2941, 1720, 1417, 1278, 1211, 1142, 1115. **HRMS** (ESI): Calcd for  $\text{C}_{14}\text{H}_{14}\text{F}_3\text{O}_5\text{S}^+$  ( $\text{M}+\text{H}^+$ ): 351.0509, found: 351.0506.

**5v** and **5w** were synthesized by the following procedure:

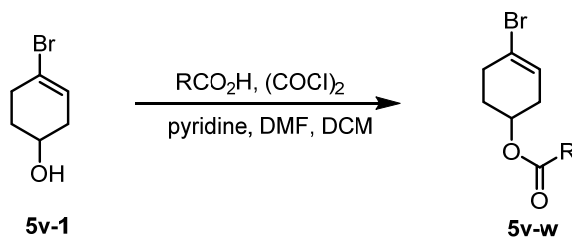

To a solution of corresponding carboxylic acid (2.2 mmol, 1.1 equiv.) and 1 drop of DMF in dichloromethane (1.0 mL) was added oxalyl chloride (203  $\mu\text{L}$ , 2.4 mmol, 1.2 equiv.) dropwise at 0  $^\circ\text{C}$ . The reaction mixture was stirred at room temperature for another 1 h until the bubbling stopped. A mixture of **5v-1** (354 mg, 2.0 mmol, 1.0 equiv.) and pyridine (161  $\mu\text{L}$ , 2.0 mmol, 1.0 equiv.) were then added and the reaction was stirred for another 3 h. The organic layer was washed with diluted hydrochloric acid and then concentrated under vacuum. The resulting crude product was purified by column chromatography.

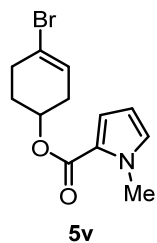

**5v**: Colorless oil. (2.0 mmol scale, 265 mg, 47% yield).  $R_f = 0.25$  (hexane/ethyl acetate = 10:1).  $^1\text{H NMR}$  (400 MHz, Chloroform-*d*)  $\delta$  6.97 (dd,  $J = 3.9, 1.8$  Hz, 1H), 6.81 (t,  $J = 2.2$  Hz, 1H), 6.13 (dd,  $J = 4.0, 2.5$  Hz, 1H), 5.99 (tt,  $J = 4.1, 1.7$  Hz, 1H), 5.24 (tt,  $J = 5.7, 4.7$  Hz, 1H), 3.94 (s, 3H), 2.74 – 2.46 (m, 3H), 2.38 – 2.26 (m, 1H), 2.10 – 1.95 (m, 2H).  $^{13}\text{C NMR}$  (101 MHz, Chloroform-*d*)  $\delta$  160.66, 129.62, 125.40, 122.61, 121.21, 118.06, 107.88, 66.54, 36.86, 32.82, 32.42, 28.86. **IR** (KBr,  $\text{cm}^{-1}$ ):  $\nu$  2931, 2847, 1701, 1654, 1530, 1482, 1412, 1322, 1245, 1110. **HRMS** (ESI): Calcd for  $\text{C}_{12}\text{H}_{15}\text{BrNO}_2^+$  ( $\text{M}+\text{H}^+$ ): 284.0281, found: 284.0283.

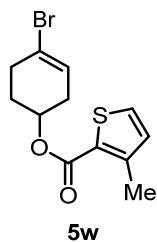

**5w**: Colorless oil. (2.0 mmol scale, 270 mg, 37% yield).  $R_f = 0.20$  (hexane/ethyl acetate = 10:1).  $^1\text{H NMR}$  (400 MHz, Chloroform-*d*)  $\delta$  7.41 (d,  $J = 5.0$  Hz, 1H), 6.93 (d,  $J = 5.0$  Hz, 1H), 5.99 (dt,  $J = 4.0, 2.2$  Hz, 1H), 5.29 (dtd,  $J = 6.9, 5.1, 3.7$  Hz, 1H), 2.75 – 2.48 (m, 6H), 2.41 – 2.30 (m, 1H), 2.06 (tdd,  $J = 6.5, 5.1, 3.9$  Hz, 2H).  $^{13}\text{C NMR}$  (101 MHz, Chloroform-*d*)  $\delta$  162.33, 146.08, 131.80, 130.26, 127.16, 125.18, 121.22, 67.60, 32.71, 32.28, 28.71, 15.99. **IR** (KBr,  $\text{cm}^{-1}$ ):  $\nu$  2928, 2847, 1701, 1654, 1541, 1414, 1257, 1225. **HRMS** (ESI): Calcd for  $\text{C}_{12}\text{H}_{14}\text{BrO}_2\text{S}^+$  ( $\text{M}+\text{H}^+$ ): 300.9892, found: 300.9888.

**5ai**, **5aj**, and **5ak** were synthesized by the following procedure:

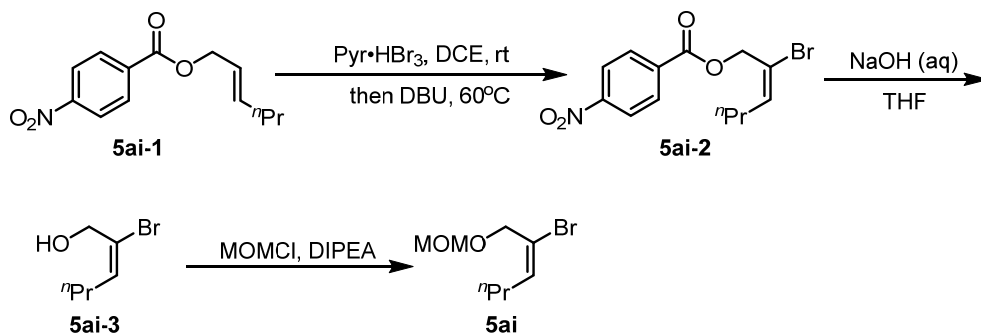

Following a known procedure<sup>19</sup>: A mixture of **5ai-1** (12.1 g, 49 mmol, 1.0 equiv.) and pyridinium bromide perbromide (17.1 g, 53.5 mmol, 1.1 equiv.) in 1,2-dichloroethane (0.1 M) was stirred at room temperature for 12–14 h. 1,8-Diazabicyclo[5.4.0]undec-7-ene (22.6 mL, 150 mmol, 3.1 equiv.) was added to the reaction mixture at 0 °C and the reaction mixture was then heated to 60 °C. The reaction was quenched with 1 M aqueous HCl, and the reaction mixture was extracted with dichloromethane, concentrated in vacuo, and purified by silica gel column chromatography to afford **5ai-2** (14.3 g, 89%).

To a solution of **5ai-2** (10 g, 30.5 mmol, 1.0 equiv.) in tetrahydrofuran (60 mL) was added 2M aqueous NaOH solution (30.5 mL, 61 mmol, 2.0 equiv.) dropwise at room temperature. The reaction mixture was stirred at room temperature overnight. The reaction mixture was treated with 1 M HCl (aq) and extracted with Et<sub>2</sub>O (3 × 60 mL). The combined organic extracts were washed with brine (40 mL), dried over anhydrous MgSO<sub>4</sub>, filtered, and the solvent was removed in vacuo. The resulting crude product was purified by column chromatography to afford **5ai-3** (4.83 g, 88%).

To a solution of **5ai-3** (1.79 g, 10.0 mmol, 1.0 equiv.) and *N,N*-diisopropylethylamine (2.17 mL, 12.5 mmol, 1.25 equiv.) in dichloromethane (30 mL) was added chloromethyl methyl ether (1.14 mL, 15.0 mmol, 1.5 equiv.) dropwise at 0 °C. The reaction mixture was stirred at room temperature overnight. The reaction mixture was treated with 1 M HCl (aq) and extracted with Et<sub>2</sub>O (3 × 30 mL). The combined organic extracts were washed with brine (20 mL), dried over anhydrous MgSO<sub>4</sub>, filtered, and the solvent was removed in vacuo. The resulting crude product was purified by column chromatography to afford **5ai** (2.00 g, 90%).

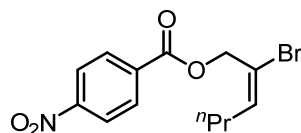

**5ai-2**

**5ai-2:** Colorless oil. (53.5 mmol scale, 14.3 g, 89% yield).  $R_f = 0.50$  (hexane/ethyl acetate = 10:1).  **$^1\text{H NMR}$**  (400 MHz, Chloroform-*d*)  $\delta$  8.36 – 8.21 (m, 4H), 6.23 (t,  $J = 7.9$  Hz, 1H), 5.10 (s, 2H), 2.22 (q,  $J = 7.6$  Hz, 2H), 1.48 (h,  $J = 7.4$  Hz, 2H), 0.95 (t,  $J = 7.4$  Hz, 3H).  **$^{13}\text{C NMR}$**  (101 MHz, Chloroform-*d*)  $\delta$  164.19, 150.69, 139.26, 135.16, 130.95, 123.63, 116.83, 64.70, 31.90, 22.26, 13.57. **IR** (KBr,  $\text{cm}^{-1}$ ):  $\nu$  2961, 2933, 2872, 1731, 1609, 1529, 1349, 1271, 1101. **HRMS** (ESI): Calcd for  $\text{C}_{13}\text{H}_{15}\text{BrNO}_4^+$  ( $\text{M}+\text{H}^+$ ): 328.0179, found: 328.0167.

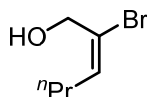

**5ai-3**

**5ai-3:** Colorless oil. (30.5 mmol scale, 4.83 g, 88% yield).  $R_f = 0.25$  (hexane/ethyl acetate = 3:1).  **$^1\text{H NMR}$**  (400 MHz, Chloroform-*d*)  $\delta$  6.01 (t,  $J = 7.9$  Hz, 1H), 4.30 (d,  $J = 5.5$  Hz, 2H), 2.10 (q,  $J = 7.6$  Hz, 2H), 2.02 (s, 1H), 1.42 (h,  $J = 7.4$  Hz, 2H), 0.91 (t,  $J = 7.4$  Hz, 3H).  **$^{13}\text{C NMR}$**  (101 MHz, Chloroform-*d*)  $\delta$  135.21, 124.43, 62.58, 31.56, 22.39, 13.54. **IR** (KBr,  $\text{cm}^{-1}$ ):  $\nu$  3354, 2960, 2931, 2872, 1457, 1047, 1013. **HRMS** (ESI): Calcd for  $\text{C}_{12}\text{H}_{23}\text{Br}_2\text{O}_2^+$  ( $2\text{M}+\text{H}^+$ ): 357.0059, found: 357.0062.

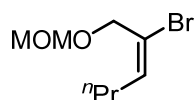

**5ai**

**5ai:** Colorless oil. (10.0 mmol scale, 2.00 g, 90% yield).  $R_f = 0.50$  (hexane/ethyl acetate = 10:1).  **$^1\text{H NMR}$**  (400 MHz, Chloroform-*d*)  $\delta$  6.13 (t,  $J = 7.9$  Hz, 1H), 4.65 (s, 2H), 4.29 (s, 2H), 3.40 (s, 3H), 2.11 (q,  $J = 7.5$  Hz, 2H), 1.42 (h,  $J = 7.4$  Hz, 2H), 0.91 (t,  $J = 7.4$  Hz, 3H).  **$^{13}\text{C NMR}$**  (101 MHz, Chloroform-*d*)  $\delta$  137.67, 120.23, 94.94, 66.10, 55.54, 31.66, 22.38, 13.55. **IR** (KBr,  $\text{cm}^{-1}$ ):  $\nu$  2959, 2933, 2823, 1152, 1104, 1061, 1009. **HRMS** (ESI): Calcd for  $\text{C}_8\text{H}_{16}\text{BrO}_2^+$  ( $\text{M}+\text{H}^+$ ): 223.0328, found: 223.0338.

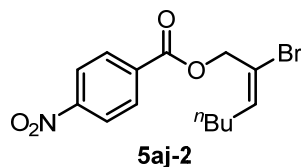

**5aj-2:** Colorless oil. (25 mmol scale, 7.20 g, 85% yield).  $R_f = 0.50$  (hexane/ethyl acetate = 10:1).  **$^1\text{H NMR}$**  (400 MHz, Chloroform-*d*)  $\delta$  8.29 – 8.21 (m, 2H), 8.21 – 8.13 (m, 2H), 6.16 (t,  $J = 7.9$  Hz, 1H), 5.02 (s, 2H), 2.17 (q,  $J = 7.5$  Hz, 2H), 1.41 – 1.23 (m, 4H), 0.84 (t,  $J = 7.2$  Hz, 3H).  **$^{13}\text{C NMR}$**  (101 MHz, Chloroform-*d*)  $\delta$  139.48, 130.96, 123.63, 116.64, 64.70, 31.13, 29.69, 22.14, 13.83. **IR** (KBr,  $\text{cm}^{-1}$ ):  $\nu$  2958, 2930, 2872, 1731, 1529m 1348, 1269, 1113, 1101. **HRMS** (ESI): Calcd for  $\text{C}_{14}\text{H}_{16}\text{BrNO}_4\text{Na}^+$  ( $\text{M}+\text{Na}^+$ ): 364.0155, found: 364.0147.

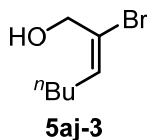

**5aj-3:** Colorless oil. (15 mmol scale, 2.70 g, 93% yield).  $R_f = 0.25$  (hexane/ethyl acetate = 3:1).  **$^1\text{H NMR}$**  (400 MHz, Chloroform-*d*)  $\delta$  5.95 (t,  $J = 7.9$  Hz, 1H), 4.24 (d,  $J = 6.5$  Hz, 2H), 2.06 (q,  $J = 7.4$  Hz, 2H), 1.87 (t,  $J = 6.6$  Hz, 1H), 1.38 – 1.17 (m, 4H), 0.83 (t,  $J = 7.2$  Hz, 3H).  **$^{13}\text{C NMR}$**  (101 MHz, Chloroform-*d*)  $\delta$  135.42, 124.25, 62.59, 31.28, 29.33, 22.10, 13.81. **IR** (KBr,  $\text{cm}^{-1}$ ):  $\nu$  3346, 2957, 2928, 2871, 2860, 1457, 1053, 1019. **HRMS** (ESI): Calcd for  $\text{C}_{14}\text{H}_{27}\text{Br}_2\text{O}_2^+$  ( $2\text{M}+\text{H}^+$ ): 385.0372, found: 385.0383.

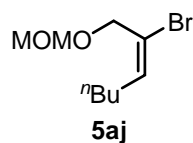

**5aj:** Colorless oil. (10.0 mmol scale, 2.15 g, 90% yield).  $R_f = 0.50$  (hexane/ethyl acetate = 10:1).  **$^1\text{H NMR}$**  (400 MHz, Chloroform-*d*)  $\delta$  6.07 (t,  $J = 7.9$  Hz, 1H), 4.59 (s, 2H), 4.22 (s, 2H), 3.34 (s, 3H), 2.07 (q,  $J = 7.4$  Hz, 2H), 1.37 – 1.20 (m, 4H), 0.83 (t,  $J = 7.1$  Hz, 3H).  **$^{13}\text{C NMR}$**  (101 MHz, Chloroform-*d*)  $\delta$  137.88, 120.03, 94.96, 66.12, 55.54, 31.28, 29.43, 22.11, 13.83. **IR** (KBr,  $\text{cm}^{-1}$ ):  $\nu$  2956, 2931, 2823, 1465, 1152, 1104, 1060, 1015. **HRMS** (ESI): Calcd for  $\text{C}_9\text{H}_{17}\text{BrO}_2\text{Na}^+$  ( $\text{M}+\text{Na}^+$ ): 259.0304, found: 259.0321.



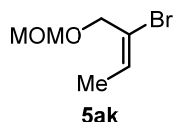

**5ak**: Colorless oil. (3.0 mmol scale, 472 mg, 81% yield).  $R_f = 0.50$  (hexane/ethyl acetate = 10:1).  $^1\text{H NMR}$  (400 MHz, Chloroform-*d*)  $\delta$  6.20 (q,  $J = 7.3$  Hz, 1H), 4.67 (s, 2H), 4.31 (s, 2H), 3.42 (s, 3H), 1.75 (d,  $J = 7.3$  Hz, 3H).  $^{13}\text{C NMR}$  (101 MHz, Chloroform-*d*)  $\delta$  132.24, 120.50, 94.95, 65.83, 55.55, 15.20. **IR** (KBr,  $\text{cm}^{-1}$ ):  $\nu$  2939, 2887, 2824, 1152, 1126, 1103, 1056, 1017. **HRMS** (ESI): Calcd for  $\text{C}_6\text{H}_{11}\text{BrO}_2^+$  ( $\text{M}+\text{H}^+$ ): 195.0015, found: 195.0003.

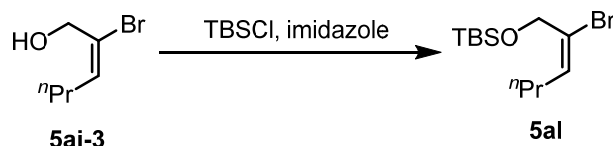

To a solution of **5ai-3** (0.54 g, 3.0 mmol, 1.0 equiv.) and imidazole (0.41 g, 6.0 mmol, 2.0 equiv.) in dichloromethane (10 mL), *tert*-butyldimethylsilyl chloride was slowly added. The reaction mixture was stirred at room temperature for another 6 h. The reaction mixture was treated with 1 M HCl (aq) and extracted with  $\text{Et}_2\text{O}$  ( $3 \times 30$  mL). The combined organic extracts were washed with brine (20 mL), dried over anhydrous  $\text{MgSO}_4$ , filtered, and the solvent was removed in vacuo. The resulting crude product was purified by column chromatography to afford **5al** (0.58 g, 66%).

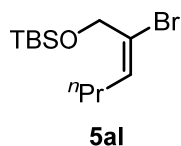

**5al**: Colorless oil. (3.0 mmol scale, 580 mg, 66% yield).  $R_f = 0.80$  (hexane/ethyl acetate = 10:1).  $^1\text{H NMR}$  (400 MHz, Chloroform-*d*)  $\delta$  5.86 (t,  $J = 7.8$  Hz, 1H), 4.22 (s, 2H), 1.98 (q,  $J = 7.6$  Hz, 2H), 1.30 (h,  $J = 7.4$  Hz, 2H), 0.83 – 0.77 (m, 12H), 0.00 (s, 6H).  $^{13}\text{C NMR}$  (101 MHz, Chloroform-*d*)  $\delta$  134.52, 124.38, 63.26, 31.65, 25.88, 22.44, 18.44, 13.61, -5.14. **IR** (KBr,  $\text{cm}^{-1}$ ):  $\nu$  2958, 2930, 2858, 1472, 1463, 1252, 1142, 1102, 837. **HRMS** (ESI): Calcd for  $\text{C}_{12}\text{H}_{25}\text{BrOSi}^+$  ( $\text{M}+\text{H}^+$ ): 293.0931, found: 293.0919.

*General procedure for Pd/NBE-catalyzed alkenyl Catellani reaction*

Unless otherwise noted, an oven-dried 8.0 mL vial was charged with Pd(cod)Cl<sub>2</sub> (8.6 mg, 0.03 mmol, 0.10 equiv) and Ph-DavePhos (11.4 mg, 0.03 mmol, 0.10 equiv). The vial was partially capped and transferred in a nitrogen-filled glovebox. In the glovebox, 1,4-dioxane (1 mL) was addition and the mixture was stirred for 1 min. Vinyl triflate **5** (0.30 mmol, 1.0 equiv), alkyl iodide **2** (0.9 mmol, 3.0 equiv), olefin **3** (0.45 mmol, 1.5 equiv), **N11** (22.7 mg, 0.15 mmol, 0.50 equiv), 5-(trifluoromethyl)-2-pyridinol (9.8 mg, 0.06 mmol, 0.20 equiv), Cs<sub>2</sub>CO<sub>3</sub> (293 mg, 0.9 mmol, 3.0 equiv), and additional 1,4-dioxane (5 mL) were added to the vial. The vial was tightly sealed, transferred out of glovebox and stirred on a pie-block preheated to 100 °C for 16 h. Upon completion of the reaction, the mixture was filtered through a thin pad of silica gel. The filter cake was washed with ethyl acetate, and the combined filtrate was concentrated. The residue was directly purified by flash column chromatography on silica gel to yield the desired product. (Note: an accurate palladium/ligand ratio and good solvent quality are important for the reproducibility.)

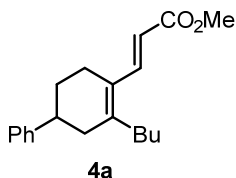

**4a**: Light yellow oil. (0.3 mmol scale, 66.2 mg, 74% yield from vinyl triflate **5a**; 63.5 mg, 71% yield from vinyl bromide **1a**).  $R_f = 0.35$  (hexane/ethyl acetate = 10:1). <sup>1</sup>H NMR (400 MHz, Chloroform-*d*)  $\delta$  7.89 (d,  $J = 15.6$  Hz, 1H), 7.36 – 7.27 (m, 2H), 7.27 – 7.16 (m, 3H), 5.84 (d,  $J = 15.6$  Hz, 1H), 3.76 (s, 3H), 2.88 – 2.72 (m, 1H), 2.55 – 2.21 (m, 6H), 2.12 – 1.94 (m, 1H), 1.85 – 1.69 (m, 1H), 1.56 – 1.40 (m, 2H), 1.40 – 1.29 (m, 2H), 0.92 (t,  $J = 7.2$  Hz, 3H). <sup>13</sup>C NMR (101 MHz, Chloroform-*d*)  $\delta$  168.50, 147.72, 146.27, 142.37, 128.50, 126.81, 126.79, 126.27, 114.82, 51.47, 40.03, 39.78, 33.38, 31.51, 29.42, 25.96, 22.82, 14.01. IR (KBr, cm<sup>-1</sup>):  $\nu$  2958, 2929, 2872, 1705, 1619, 1367, 1304, 1149. HRMS (ESI): Calcd for C<sub>20</sub>H<sub>27</sub>O<sub>2</sub><sup>+</sup> (M+H<sup>+</sup>): 299.2006, found: 299.2011.

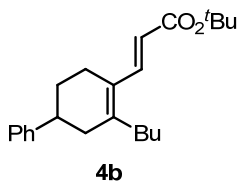

**4b**: Light yellow oil. (0.3 mmol scale, 74.4 mg, 73% yield).  $R_f = 0.35$  (hexane/ethyl acetate = 10:1).  $^1\text{H NMR}$  (400 MHz, Chloroform-*d*)  $\delta$  7.83 (d,  $J = 15.6$  Hz, 1H), 7.36 – 7.29 (m, 2H), 7.26 – 7.19 (m, 3H), 5.79 (d,  $J = 15.6$  Hz, 1H), 2.86 – 2.71 (m, 1H), 2.51 – 2.21 (m, 6H), 2.11 – 1.97 (m, 1H), 1.84 – 1.66 (m, 1H), 1.53 (s, 9H), 1.48 – 1.39 (m, 2H), 1.39 – 1.30 (m, 2H), 0.93 (t,  $J = 7.2$  Hz, 3H).  $^{13}\text{C NMR}$  (101 MHz, Chloroform-*d*)  $\delta$  167.48, 146.73, 146.36, 141.21, 128.48, 126.81, 126.24, 117.12, 79.90, 40.08, 39.73, 33.35, 31.49, 29.48, 28.29, 26.00, 22.86, 14.02. **IR** (KBr,  $\text{cm}^{-1}$ ):  $\nu$  2954, 2929, 2871, 1720, 1620, 1303, 1171. **HRMS** (ESI): Calcd for  $\text{C}_{23}\text{H}_{33}\text{O}_2^+$  ( $\text{M}+\text{H}^+$ ): 341.2475, found: 341.2478.

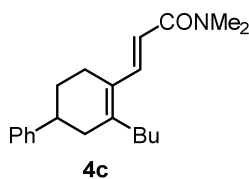

**4c**: Light yellow oil. (0.3 mmol scale, 70.9 mg, 76% yield).  $R_f = 0.45$  (hexane/ethyl acetate = 1:1).  $^1\text{H NMR}$  (400 MHz, Chloroform-*d*)  $\delta$  7.87 (d,  $J = 15.0$  Hz, 1H), 7.35 – 7.28 (m, 2H), 7.25 – 7.17 (m, 3H), 6.25 (d,  $J = 15.0$  Hz, 1H), 3.10 (s, 3H), 3.04 (s, 3H), 2.88 – 2.72 (m, 1H), 2.48 – 2.22 (m, 6H), 2.09 – 1.98 (m, 1H), 1.88 – 1.69 (m, 1H), 1.49 – 1.37 (m, 2H), 1.38 – 1.27 (m, 2H), 0.90 (t,  $J = 7.2$  Hz, 3H).  $^{13}\text{C NMR}$  (101 MHz, Chloroform-*d*)  $\delta$  167.77, 146.45, 145.71, 140.03, 128.47, 126.81, 126.21, 114.25, 40.14, 39.66, 37.35, 35.84, 33.39, 31.52, 29.54, 26.25, 22.90, 14.05. **IR** (KBr,  $\text{cm}^{-1}$ ):  $\nu$  2954, 2927, 2870, 1646, 1596, 1390, 1133. **HRMS** (ESI): Calcd for  $\text{C}_{21}\text{H}_{30}\text{NO}^+$  ( $\text{M}+\text{H}^+$ ): 312.2322, found: 312.2332.

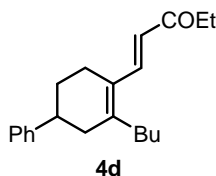

**4d**: Light yellow oil. (0.3 mmol scale, 40.0 mg, 45% yield).  $R_f = 0.40$  (hexane/ethyl acetate = 10:1).  $^1\text{H NMR}$  (400 MHz, Chloroform-*d*)  $\delta$  7.79 (d,  $J = 15.8$  Hz, 1H), 7.35 – 7.29 (m, 2H),

7.25 – 7.19 (m, 3H), 6.17 (d,  $J = 15.7$  Hz, 1H), 2.87 – 2.73 (m, 1H), 2.62 (q,  $J = 7.3$  Hz, 2H), 2.52 – 2.22 (m, 6H), 2.11 – 2.01 (m, 1H), 1.82 – 1.70 (m, 1H), 1.51 – 1.40 (m, 2H), 1.40 – 1.30 (m, 2H), 1.15 (t,  $J = 7.3$  Hz, 3H), 0.93 (t,  $J = 7.2$  Hz, 3H).  $^{13}\text{C}$  NMR (101 MHz, Chloroform-*d*)  $\delta$  201.67, 148.52, 146.22, 139.68, 128.50, 127.10, 126.78, 126.28, 123.42, 40.03, 39.96, 34.17, 33.43, 31.56, 29.45, 26.01, 22.82, 14.00, 8.46. IR (KBr,  $\text{cm}^{-1}$ ):  $\nu$  2956, 2928, 2871, 1685, 1663, 1617, 1588, 1456, 1191. HRMS (ESI): Calcd for  $\text{C}_{21}\text{H}_{29}\text{O}^+$  ( $\text{M}+\text{H}^+$ ): 297.2213, found: 297.2220.

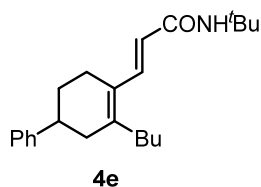

**4e**: Colorless needle-like crystal. Melting point = 162–163 °C. (0.3 mmol scale, 77.0 mg, 75% yield).  $R_f = 0.55$  (hexane/ethyl acetate = 2:1).  $^1\text{H}$  NMR (400 MHz, Chloroform-*d*)  $\delta$  7.72 (d,  $J = 15.1$  Hz, 1H), 7.35 – 7.27 (m, 2H), 7.26 – 7.17 (m, 3H), 5.77 (d,  $J = 15.1$  Hz, 1H), 5.56 (s, 1H), 2.87 – 2.69 (m, 1H), 2.49 – 2.16 (m, 6H), 2.06 – 1.95 (m, 1H), 1.81 – 1.69 (m, 1H), 1.52 – 1.40 (m, 2H), 1.38 (s, 9H), 1.37 – 1.26 (m, 2H), 0.92 (t,  $J = 7.2$  Hz, 3H).  $^{13}\text{C}$  NMR (101 MHz, Chloroform-*d*)  $\delta$  167.74, 148.62, 146.92, 139.18, 130.28, 128.71, 128.33, 127.99, 121.22, 52.89, 42.05, 41.41, 35.14, 33.33, 31.57, 30.55, 28.11, 24.78, 15.75. IR (KBr,  $\text{cm}^{-1}$ ):  $\nu$  3246, 2958, 2926, 2861, 1646, 1603, 1548, 1452, 1344. HRMS (ESI): Calcd for  $\text{C}_{23}\text{H}_{34}\text{NO}^+$  ( $\text{M}+\text{H}^+$ ): 340.2635, found: 340.2647.

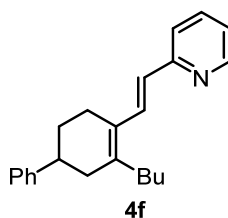

**4f**: Light yellow oil. (0.3 mmol scale, 66.6 mg, 70% yield).  $R_f = 0.45$  (hexane/ethyl acetate = 5:1).  $^1\text{H}$  NMR (400 MHz, Chloroform-*d*)  $\delta$  8.51 (ddd,  $J = 4.8, 1.9, 0.9$  Hz, 1H), 7.75 (d,  $J = 15.9$  Hz, 1H), 7.55 (td,  $J = 7.7, 1.9$  Hz, 1H), 7.28 (dd,  $J = 7.9, 6.8$  Hz, 3H), 7.21 (dd,  $J = 8.2, 1.4$  Hz, 2H), 7.20 – 7.14 (m, 1H), 7.02 (ddd,  $J = 7.5, 4.9, 1.1$  Hz, 1H), 6.56 (d,  $J = 15.8$  Hz, 1H), 2.86 – 2.70 (m, 1H), 2.58 – 2.46 (m, 1H), 2.46 – 2.24 (m, 5H), 2.09 – 1.98 (m, 1H), 1.83

– 1.67 (m, 1H), 1.50 – 1.39 (m, 2H), 1.39 – 1.28 (m, 2H), 0.89 (t,  $J = 7.2$  Hz, 3H).  $^{13}\text{C}$  NMR (101 MHz, Chloroform- $d$ )  $\delta$  156.94, 149.58, 146.80, 141.62, 136.30, 130.82, 128.45, 127.54, 126.88, 126.14, 125.51, 121.33, 121.30, 40.34, 39.67, 33.29, 31.40, 29.77, 26.32, 22.92, 14.15. **IR** (KBr,  $\text{cm}^{-1}$ ):  $\nu$  2954, 2926, 2869, 1624, 1582, 1467, 1428. **HRMS** (ESI): Calcd for  $\text{C}_{23}\text{H}_{28}\text{N}^+$  ( $\text{M}+\text{H}^+$ ): 318.2216, found: 318.2228.

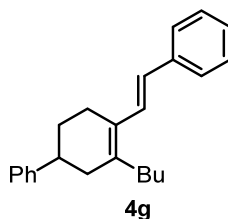

**4g**: Light yellow oil. (0.3 mmol scale, 45.4 mg, 48% yield).  $R_f = 0.40$  (hexane/ethyl acetate = 20:1).  $^1\text{H}$  NMR (400 MHz, Chloroform- $d$ )  $\delta$  7.43 (d,  $J = 7.3$  Hz, 2H), 7.35 – 7.25 (m, 7H), 7.24 – 7.17 (m, 2H), 6.52 (d,  $J = 16.0$  Hz, 1H), 2.89 – 2.76 (m, 1H), 2.60 – 2.50 (m, 1H), 2.46 – 2.20 (m, 5H), 2.13 – 2.01 (m, 1H), 1.88 – 1.72 (m, 1H), 1.52 – 1.32 (m, 4H), 0.94 (t,  $J = 7.2$  Hz, 3H).  $^{13}\text{C}$  NMR (101 MHz, Chloroform- $d$ )  $\delta$  146.90, 139.01, 138.57, 128.60, 128.42, 127.55, 127.07, 126.87, 126.83, 126.17, 126.10, 125.56, 40.44, 39.63, 33.16, 31.36, 29.79, 26.30, 22.92, 14.11. **IR** (KBr,  $\text{cm}^{-1}$ ):  $\nu$  3025, 2955, 2926, 2858, 1597, 1492, 1449. **HRMS** (ESI): Calcd for  $\text{C}_{24}\text{H}_{29}^+$  ( $\text{M}+\text{H}^+$ ): 317.2264, found: 317.2263.

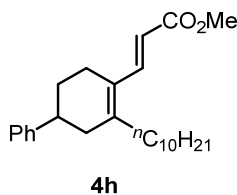

**4h**: Light yellow oil. (0.3 mmol scale, 87.1 mg, 76% yield).  $R_f = 0.35$  (hexane/ethyl acetate = 10:1).  $^1\text{H}$  NMR (400 MHz, Chloroform- $d$ )  $\delta$  7.90 (d,  $J = 15.6$  Hz, 1H), 7.37 – 7.29 (m, 2H), 7.25 – 7.18 (m, 3H), 5.85 (d,  $J = 15.6$  Hz, 1H), 3.77 (s, 3H), 2.86 – 2.72 (m, 1H), 2.54 – 2.22 (m, 6H), 2.10 – 2.00 (m, 1H), 1.86 – 1.71 (m, 1H), 1.56 – 1.38 (m, 2H), 1.39 – 1.18 (m, 15H), 0.93 – 0.85 (m, 3H).  $^{13}\text{C}$  NMR (101 MHz, Chloroform- $d$ )  $\delta$  168.47, 147.75, 146.27, 142.36, 128.50, 126.79, 126.27, 114.84, 51.45, 40.04, 39.77, 33.67, 31.94, 29.72, 29.64, 29.61, 29.52, 29.44, 29.37, 29.35, 25.97, 22.73, 14.16. **IR** (KBr,  $\text{cm}^{-1}$ ):  $\nu$  2925, 2854, 1720, 1621, 1301, 1255, 1169, 1099. **HRMS** (ESI): Calcd for  $\text{C}_{26}\text{H}_{39}\text{O}_2^+$  ( $\text{M}+\text{H}^+$ ): 383.2945, found: 383.2947.

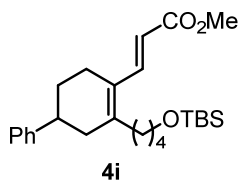

**4i**: Light yellow oil. (0.3 mmol scale, 93.7 mg, 73% yield).  $R_f = 0.35$  (hexane/ethyl acetate = 10:1).  $^1\text{H NMR}$  (400 MHz, Chloroform-*d*)  $\delta$  7.88 (d,  $J = 15.6$  Hz, 1H), 7.38 – 7.29 (m, 2H), 7.25 – 7.19 (m, 3H), 5.85 (d,  $J = 15.6$  Hz, 1H), 3.77 (s, 3H), 3.67 – 3.58 (m, 2H), 2.87 – 2.70 (m, 1H), 2.54 – 2.25 (m, 6H), 2.10 – 2.00 (m, 1H), 1.83 – 1.72 (m, 1H), 1.61 – 1.46 (m, 4H), 0.89 (s, 9H), 0.05 (s, 6H).  $^{13}\text{C NMR}$  (101 MHz, Chloroform-*d*)  $\delta$  168.38, 147.25, 146.20, 142.19, 128.49, 127.08, 126.78, 126.27, 115.07, 62.92, 51.45, 39.98, 39.61, 33.27, 32.73, 29.42, 25.99, 25.44, 18.36, -5.24. **IR** (KBr,  $\text{cm}^{-1}$ ):  $\nu$  2950, 2929, 2857, 1720, 1621, 1301, 1255, 1169, 1099. **HRMS** (ESI): Calcd for  $\text{C}_{26}\text{H}_{41}\text{O}_3\text{Si}^+$  ( $\text{M}+\text{H}^+$ ): 429.2819, found: 429.2828.

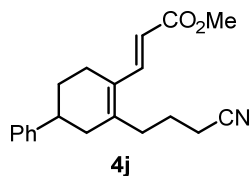

**4j**: Light yellow oil. (0.3 mmol scale, 63.7 mg, 68% yield).  $R_f = 0.25$  (hexane/ethyl acetate = 5:1).  $^1\text{H NMR}$  (400 MHz, Chloroform-*d*)  $\delta$  7.80 (d,  $J = 15.5$  Hz, 1H), 7.36 – 7.29 (m, 2H), 7.26 – 7.19 (m, 3H), 5.90 (d,  $J = 15.6$  Hz, 1H), 3.77 (s, 3H), 2.88 – 2.75 (m, 1H), 2.56 – 2.28 (m, 8H), 2.13 – 2.00 (m, 1H), 1.89 – 1.72 (m, 3H).  $^{13}\text{C NMR}$  (101 MHz, Chloroform-*d*)  $\delta$  168.10, 145.76, 143.93, 141.16, 128.75, 128.58, 126.73, 126.44, 119.29, 116.36, 51.61, 39.88, 39.54, 32.37, 29.21, 26.09, 24.82, 17.02. **IR** (KBr,  $\text{cm}^{-1}$ ):  $\nu$  22928, 2882, 1715, 1621, 1434, 1303, 1274, 1192, 1169. **HRMS** (ESI): Calcd for  $\text{C}_{20}\text{H}_{24}\text{NO}_2^+$  ( $\text{M}+\text{H}^+$ ): 310.1802, found: 310.1808.

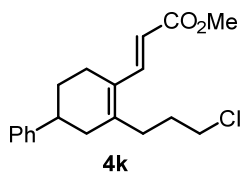

**4k**: Light yellow oil. (0.3 mmol scale, 53.6 mg, 56% yield).  $R_f = 0.35$  (hexane/ethyl acetate = 10:1).  $^1\text{H NMR}$  (400 MHz, Chloroform-*d*)  $\delta$  7.87 (d,  $J = 15.6$  Hz, 1H), 7.36 – 7.29 (m, 2H),

7.25 – 7.19 (m, 3H), 5.88 (d,  $J = 15.7$  Hz, 1H), 3.77 (s, 3H), 3.55 (t,  $J = 6.5$  Hz, 2H), 2.88 – 2.74 (m, 1H), 2.57 – 2.24 (m, 6H), 2.14 – 2.01 (m, 1H), 2.01 – 1.88 (m, 2H), 1.84 – 1.70 (m, 1H).  $^{13}\text{C}$  NMR (101 MHz, Chloroform- $d$ )  $\delta$  168.24, 145.95, 145.11, 141.71, 128.55, 128.08, 126.75, 126.38, 115.78, 51.54, 44.46, 39.98, 39.68, 31.96, 30.78, 29.32, 26.04. IR (KBr,  $\text{cm}^{-1}$ ):  $\nu$  2955, 2926, 1716, 1621, 1434, 1302, 1173. HRMS (ESI): Calcd for  $\text{C}_{19}\text{H}_{24}\text{ClO}_2^+$  ( $\text{M}+\text{H}^+$ ): 319.1459, found: 319.1470.

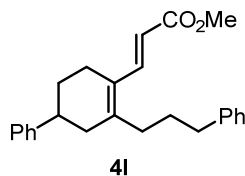

**4l**: Light yellow oil. (0.3 mmol scale, 82.2 mg, 76% yield).  $R_f = 0.35$  (hexane/ethyl acetate = 10:1).  $^1\text{H}$  NMR (400 MHz, Chloroform- $d$ )  $\delta$  7.86 (d,  $J = 15.6$  Hz, 1H), 7.33 – 7.24 (m, 4H), 7.23 – 7.14 (m, 6H), 5.85 (d,  $J = 15.6$  Hz, 1H), 3.76 (s, 3H), 2.82 – 2.70 (m, 1H), 2.64 (t,  $J = 7.7$  Hz, 2H), 2.45 – 2.20 (m, 6H), 2.07 – 1.96 (m, 1H), 1.86 – 1.68 (m, 3H).  $^{13}\text{C}$  NMR (101 MHz, Chloroform- $d$ )  $\delta$  168.40, 146.96, 146.20, 142.15, 141.94, 128.54, 128.40, 127.26, 126.81, 126.33, 125.88, 115.21, 51.51, 40.02, 39.68, 35.92, 33.34, 30.83, 29.41, 26.03. IR (KBr,  $\text{cm}^{-1}$ ):  $\nu$  3026, 2929, 1717, 1618, 1434, 1302, 1271, 1165. HRMS (ESI): Calcd for  $\text{C}_{25}\text{H}_{29}\text{O}_2^+$  ( $\text{M}+\text{H}^+$ ): 361.2162, found: 361.2168.

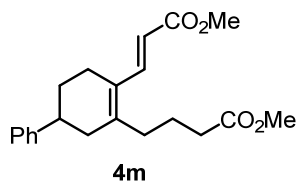

**4m**: Light yellow oil. (0.3 mmol scale, 70.9 mg, 69% yield).  $R_f = 0.30$  (hexane/ethyl acetate = 5:1).  $^1\text{H}$  NMR (400 MHz, Chloroform- $d$ )  $\delta$  7.84 (d,  $J = 15.6$  Hz, 1H), 7.37 – 7.28 (m, 2H), 7.25 – 7.16 (m, 3H), 5.86 (d,  $J = 15.6$  Hz, 1H), 3.76 (s, 3H), 3.68 (s, 3H), 2.87 – 2.72 (m, 1H), 2.54 – 2.23 (m, 8H), 2.09 – 1.97 (m, 1H), 1.87 – 1.66 (m, 3H).  $^{13}\text{C}$  NMR (101 MHz, Chloroform- $d$ )  $\delta$  173.62, 168.26, 146.04, 145.91, 141.84, 128.51, 127.78, 126.77, 126.31, 115.53, 51.62, 51.49, 39.96, 39.52, 33.60, 32.73, 29.34, 26.02, 24.19. IR (KBr,  $\text{cm}^{-1}$ ):  $\nu$  2949, 2926, 1737, 1718, 1620, 1435, 1303, 1274, 1192, 1170. HRMS (ESI): Calcd for  $\text{C}_{21}\text{H}_{27}\text{O}_4^+$  ( $\text{M}+\text{H}^+$ ): 343.1904, found: 343.1912.

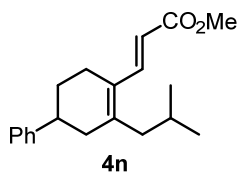

**4n:** Light yellow oil. (0.3 mmol scale, 35.9 mg, 40% yield).  $R_f = 0.35$  (hexane/ethyl acetate = 10:1).  $^1\text{H NMR}$  (400 MHz, Chloroform-*d*)  $\delta$  7.90 (d,  $J = 15.6$  Hz, 1H), 7.35 – 7.29 (m, 2H), 7.25 – 7.19 (m, 3H), 5.85 (d,  $J = 15.6$  Hz, 1H), 3.77 (s, 3H), 2.89 – 2.72 (m, 1H), 2.51 – 2.27 (m, 4H), 2.27 – 2.19 (m, 2H), 2.13 – 2.01 (m, 1H), 1.92 – 1.68 (m, 2H), 0.92 (d,  $J = 5.1$  Hz, 3H), 0.90 (d,  $J = 5.0$  Hz, 3H).  $^{13}\text{C NMR}$  (101 MHz, Chloroform-*d*)  $\delta$  168.49, 146.67, 146.25, 142.70, 128.50, 127.81, 126.78, 126.28, 114.80, 51.47, 42.49, 40.31, 40.03, 29.44, 28.16, 26.15, 22.84, 22.41. **IR** (KBr,  $\text{cm}^{-1}$ ):  $\nu$  2953, 2925, 2868, 1718, 1618, 1434, 1303, 1190, 1172. **HRMS** (ESI): Calcd for  $\text{C}_{20}\text{H}_{27}\text{O}_2^+$  ( $\text{M}+\text{H}^+$ ): 229.2006, found: 229.2016.

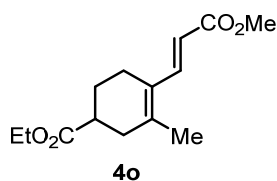

**4o:** Light yellow oil. (0.3 mmol scale, 37.9 mg, 50% yield, run with  $\text{PhNMe}_3\text{I}$  instead of MeI).  $R_f = 0.40$  (hexane/ethyl acetate = 10:1).  $^1\text{H NMR}$  (400 MHz, Chloroform-*d*)  $\delta$  7.83 (d,  $J = 15.6$  Hz, 1H), 5.79 (d,  $J = 15.6$  Hz, 1H), 4.15 (q,  $J = 7.1$  Hz, 2H), 3.75 (s, 3H), 2.62 – 2.52 (m, 1H), 2.52 – 2.40 (m, 1H), 2.40 – 2.26 (m, 2H), 2.24 – 2.05 (m, 2H), 1.94 (h,  $J = 1.1$  Hz, 3H), 1.75 – 1.63 (m, 1H), 1.27 (t,  $J = 7.1$  Hz, 3H).  $^{13}\text{C NMR}$  (101 MHz, Chloroform-*d*)  $\delta$  175.12, 168.25, 142.19, 141.39, 126.62, 114.98, 60.47, 51.45, 39.24, 35.25, 25.04, 24.56, 19.64, 14.23. **IR** (KBr,  $\text{cm}^{-1}$ ):  $\nu$  2983, 2950, 1722, 1626, 1435, 1294, 1261, 1174. **HRMS** (ESI): Calcd for  $\text{C}_{14}\text{H}_{21}\text{O}_4^+$  ( $\text{M}+\text{H}^+$ ): 253.1434, found: 253.1443.

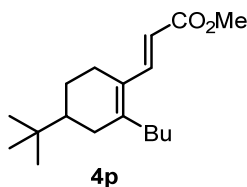

**4p:** Light yellow oil. (0.3 mmol scale, 54.4 mg, 65% yield).  $R_f = 0.35$  (hexane/ethyl acetate = 10:1).  $^1\text{H NMR}$  (400 MHz, Chloroform-*d*)  $\delta$  7.83 (d,  $J = 15.6$  Hz, 1H), 5.77 (d,  $J = 15.6$  Hz,



1H), 3.74 (s, 3H), 2.40 – 2.27 (m, 2H), 2.27 – 2.20 (m, 1H), 2.20 – 2.01 (m, 2H), 2.01 – 1.84 (m, 2H), 1.46 – 1.29 (m, 4H), 1.29 – 1.19 (m, 1H), 1.19 – 1.07 (m, 1H), 0.92 (t,  $J = 7.1$  Hz, 3H), 0.88 (s, 9H).  **$^{13}\text{C}$  NMR** (101 MHz, Chloroform-*d*)  $\delta$  168.57, 148.74, 142.59, 126.97, 114.23, 51.36, 44.02, 33.67, 33.29, 32.13, 31.75, 27.13, 26.72, 23.78, 22.84, 14.00. **IR** (KBr,  $\text{cm}^{-1}$ ):  $\nu$  2956, 2871, 1721, 1622, 1434, 1297, 1262, 1191, 1169, 1155. **HRMS** (ESI): Calcd for  $\text{C}_{18}\text{H}_{31}\text{O}_2^+$  ( $\text{M}+\text{H}^+$ ): 279.2319, found: 279.2326.

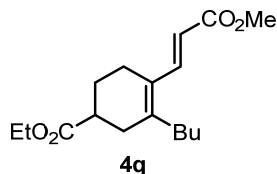

**4q**: Light yellow oil. (0.3 mmol scale, 56.4 mg, 64% yield).  $R_f = 0.40$  (hexane/ethyl acetate = 5:1).  **$^1\text{H}$  NMR** (400 MHz, Chloroform-*d*)  $\delta$  7.79 (d,  $J = 15.6$  Hz, 1H), 5.77 (d,  $J = 15.6$  Hz, 1H), 4.12 (q,  $J = 7.1$  Hz, 2H), 3.72 (s, 3H), 2.58 – 2.21 (m, 6H), 2.21 – 2.09 (m, 1H), 2.09 – 2.00 (m, 1H), 1.75 – 1.58 (m, 1H), 1.46 – 1.35 (m, 2H), 1.35 – 1.27 (m, 2H), 1.24 (t,  $J = 7.1$  Hz, 3H), 0.89 (t,  $J = 7.2$  Hz, 3H).  **$^{13}\text{C}$  NMR** (101 MHz, Chloroform-*d*)  $\delta$  175.19, 168.29, 146.04, 142.01, 126.46, 115.01, 60.47, 51.43, 39.29, 33.41, 33.24, 31.35, 25.00, 24.62, 22.72, 14.23, 13.94. **IR** (KBr,  $\text{cm}^{-1}$ ):  $\nu$  2955, 2932, 2872, 1723, 1622, 1436, 1298, 1172. **HRMS** (ESI): Calcd for  $\text{C}_{17}\text{H}_{27}\text{O}_4^+$  ( $\text{M}+\text{H}^+$ ): 295.1904, found: 295.1914.

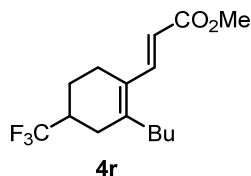

**4r**: Light yellow oil. (0.3 mmol scale, 67.1 mg, 77% yield).  $R_f = 0.45$  (hexane/ethyl acetate = 10:1).  **$^1\text{H}$  NMR** (400 MHz, Chloroform-*d*)  $\delta$  7.74 (d,  $J = 15.7$  Hz, 1H), 5.75 (d,  $J = 15.6$  Hz, 1H), 3.69 (s, 3H), 2.36 – 1.96 (m, 8H), 1.54 – 1.39 (m, 1H), 1.39 – 1.21 (m, 4H), 0.86 (t,  $J = 7.1$  Hz, 3H).  **$^{13}\text{C}$  NMR** (101 MHz, Chloroform-*d*)  $\delta$  168.13, 144.40, 141.56, 127.61 (q,  $J = 278.5$  Hz), 126.68, 115.66, 51.50, 38.58 (q,  $J = 27.3$  Hz), 33.21, 31.35, 30.04, 30.01, 29.98, 29.96, 24.47, 22.70, 21.25, 21.23, 21.20, 21.17, 13.90. **IR** (KBr,  $\text{cm}^{-1}$ ):  $\nu$  2957, 2936, 2874, 1721, 1624, 1434, 1299, 1277, 1259, 1173, 1156, 1124. **HRMS** (ESI): Calcd for  $\text{C}_{15}\text{H}_{22}\text{F}_3\text{O}_2^+$  ( $\text{M}+\text{H}^+$ ): 291.1566, found: 291.1572.

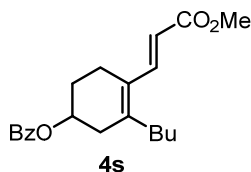

**4s:** Light yellow oil. (0.3 mmol scale, 59.2 mg, 58% yield).  $R_f = 0.20$  (hexane/ethyl acetate = 10:1).  $^1\text{H NMR}$  (400 MHz, Chloroform-*d*)  $\delta$  8.03 – 7.96 (m, 2H), 7.84 (d,  $J = 15.7$  Hz, 1H), 7.59 – 7.50 (m, 1H), 7.46 – 7.38 (m, 2H), 5.85 (d,  $J = 15.6$  Hz, 1H), 5.33 – 5.15 (m, 1H), 3.76 (s, 3H), 2.65 (dd,  $J = 18.7, 5.0$  Hz, 1H), 2.52 – 2.38 (m, 2H), 2.38 – 2.20 (m, 3H), 2.09 – 1.86 (m, 2H), 1.46 – 1.27 (m, 4H), 0.90 (t,  $J = 7.2$  Hz, 3H).  $^{13}\text{C NMR}$  (101 MHz, Chloroform-*d*)  $\delta$  168.27, 166.09, 144.27, 141.75, 132.92, 130.52, 129.52, 128.35, 126.58, 115.49, 69.64, 51.50, 36.49, 33.06, 31.21, 26.98, 22.98, 22.62, 13.94. **IR** (KBr,  $\text{cm}^{-1}$ ):  $\nu$  2954, 2930, 2871, 1717, 1622, 1298, 1274, 1174, 1114. **HRMS** (ESI): Calcd for  $\text{C}_{21}\text{H}_{27}\text{O}_4^+$  ( $\text{M}+\text{H}^+$ ): 343.1904, found: 343.1910.

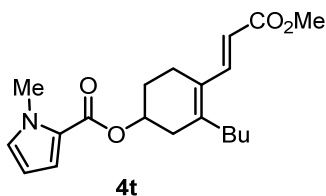

**4t:** Light yellow oil. (0.3 mmol scale, 58.2 mg, 56% yield, run with vinyl bromide instead of vinyl triflate).  $R_f = 0.20$  (hexane/ethyl acetate = 10:1).  $^1\text{H NMR}$  (400 MHz, Chloroform-*d*)  $\delta$  7.84 (d,  $J = 15.6$  Hz, 1H), 6.90 (dd,  $J = 4.0, 1.8$  Hz, 1H), 6.77 (t,  $J = 2.2$  Hz, 1H), 6.10 (dd,  $J = 4.0, 2.5$  Hz, 1H), 5.90 – 5.81 (m, 1H), 5.25 – 5.08 (m, 1H), 3.91 (s, 3H), 3.76 (s, 3H), 2.70 – 2.51 (m, 1H), 2.46 – 2.20 (m, 5H), 2.12 – 1.82 (m, 2H), 1.48 – 1.27 (m, 4H), 0.91 (t,  $J = 7.2$  Hz, 3H).  $^{13}\text{C NMR}$  (101 MHz, Chloroform-*d*)  $\delta$  168.31, 160.83, 144.52, 141.83, 129.51, 126.55, 122.74, 117.92, 115.36, 107.83, 68.44, 51.49, 36.84, 36.67, 33.09, 31.22, 27.11, 23.05, 22.64, 13.95. **IR** (KBr,  $\text{cm}^{-1}$ ):  $\nu$  2953, 2930, 2871, 1701, 1619, 1413, 1298, 1246, 1173, 1111. **HRMS** (ESI): Calcd for  $\text{C}_{20}\text{H}_{28}\text{NO}_4^+$  ( $\text{M}+\text{H}^+$ ): 346.2013, found: 346.2012.

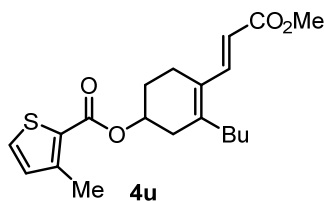

**4u**: Light yellow oil. (0.3 mmol scale, 56.0 mg, 52% yield, run with vinyl bromide instead of vinyl triflate).  $R_f = 0.20$  (hexane/ethyl acetate = 10:1).  **$^1\text{H NMR}$**  (400 MHz, Chloroform-*d*)  $\delta$  7.77 (d,  $J = 15.6$  Hz, 1H), 7.30 (d,  $J = 5.0$  Hz, 1H), 6.82 (d,  $J = 4.9$  Hz, 1H), 5.78 (dd,  $J = 15.6, 0.9$  Hz, 1H), 5.22 – 5.06 (m, 1H), 3.69 (s, 3H), 2.61 – 2.51 (m, 1H), 2.44 (s, 3H), 2.42 – 2.13 (m, 5H), 2.00 – 1.80 (m, 2H), 1.41 – 1.22 (m, 4H), 0.83 (t,  $J = 7.2$  Hz, 3H).  **$^{13}\text{C NMR}$**  (101 MHz, Chloroform-*d*)  $\delta$  168.30, 162.47, 145.91, 144.23, 141.79, 131.76, 130.13, 127.30, 126.56, 115.41, 69.47, 51.50, 36.49, 33.05, 31.20, 26.90, 22.88, 22.64, 15.95, 13.94. **IR** (KBr,  $\text{cm}^{-1}$ ):  $\nu$  2954, 2929, 2870, 1706, 1622, 1414, 1260, 1173, 1103. **HRMS** (ESI): Calcd for  $\text{C}_{20}\text{H}_{27}\text{O}_4\text{S}^+$  ( $\text{M}+\text{H}^+$ ): 363.1625, found: 363.1624.

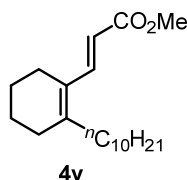

**4v**: Light yellow oil. (0.3 mmol scale, 66.6 mg, 73% yield).  $R_f = 0.35$  (hexane/ethyl acetate = 10:1).  **$^1\text{H NMR}$**  (400 MHz, Chloroform-*d*)  $\delta$  7.83 (d,  $J = 15.6$  Hz, 1H), 5.77 (d,  $J = 15.6$  Hz, 1H), 3.73 (s, 3H), 2.29 – 2.20 (m, 2H), 2.20 – 2.05 (m, 4H), 1.71 – 1.53 (m, 4H), 1.49 – 1.35 (m, 2H), 1.35 – 1.14 (m, 14H), 0.92 – 0.79 (m, 3H).  **$^{13}\text{C NMR}$**  (101 MHz, Chloroform-*d*)  $\delta$  168.54, 148.49, 142.84, 127.02, 114.10, 51.33, 33.75, 31.91, 31.58, 29.69, 29.61, 29.59, 29.52, 29.41, 29.34, 25.24, 22.69, 22.54, 22.48, 14.11. **IR** (KBr,  $\text{cm}^{-1}$ ):  $\nu$  2926, 2855, 1722, 1619, 1434, 1300, 1274, 1170. **HRMS** (ESI): Calcd for  $\text{C}_{20}\text{H}_{35}\text{O}_2^+$  ( $\text{M}+\text{H}^+$ ): 307.2632, found: 307.2636.

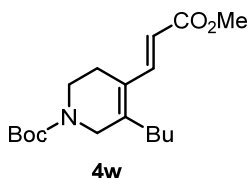

**4w**: Light yellow oil. (0.3 mmol scale, 60.0 mg, 62% yield).  $R_f = 0.40$  (hexane/ethyl acetate =

5:1). **<sup>1</sup>H NMR** (400 MHz, Chloroform-*d*)  $\delta$  7.71 (d,  $J$  = 15.6 Hz, 1H), 5.76 (d,  $J$  = 15.7 Hz, 1H), 3.90 (s, 2H), 3.69 (s, 3H), 3.44 (t,  $J$  = 5.8 Hz, 2H), 2.23 – 2.14 (m, 4H), 1.42 – 1.24 (m, 14H), 0.85 (t,  $J$  = 7.1 Hz, 3H). **<sup>13</sup>C NMR** (101 MHz, Chloroform-*d*)  $\delta$  168.04, 154.55, 141.15, 115.84, 79.86, 51.54, 31.88, 30.62, 28.45, 27.65, 24.96, 22.72, 13.88. **IR** (KBr,  $\text{cm}^{-1}$ ):  $\nu$  22957, 2931, 2871, 1701, 1628, 1421, 1302, 1243, 1173, 1126. **HRMS** (ESI): Calcd for  $\text{C}_{18}\text{H}_{30}\text{NO}_4^+$  ( $\text{M}+\text{Na}^+$ ): 346.1989, found: 346.1983.

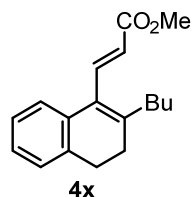

**4x**: Light yellow oil. (0.3 mmol scale, 71.2 mg, 88% yield).  $R_f$  = 0.30 (hexane/ethyl acetate = 10:1). **<sup>1</sup>H NMR** (400 MHz, Chloroform-*d*)  $\delta$  7.85 (d,  $J$  = 16.1 Hz, 1H), 7.34 (d,  $J$  = 7.2 Hz, 1H), 7.21 – 7.10 (m, 3H), 6.14 (d,  $J$  = 16.1 Hz, 1H), 3.81 (s, 3H), 2.76 – 2.65 (m, 2H), 2.48 – 2.38 (m, 2H), 2.38 – 2.24 (m, 2H), 1.57 – 1.33 (m, 4H), 0.95 (t,  $J$  = 7.2 Hz, 3H). **<sup>13</sup>C NMR** (101 MHz, Chloroform-*d*)  $\delta$  167.98, 146.86, 141.45, 136.49, 134.01, 128.43, 127.34, 126.55, 126.22, 125.26, 120.67, 51.58, 34.35, 31.01, 29.54, 28.31, 22.76, 14.05. **IR** (KBr,  $\text{cm}^{-1}$ ):  $\nu$  2954, 2931, 2860, 1719, 1624, 1434, 1298, 1271, 1169. **HRMS** (ESI): Calcd for  $\text{C}_{18}\text{H}_{23}\text{O}_2^+$  ( $\text{M}+\text{H}^+$ ): 271.1693, found: 271.1703.

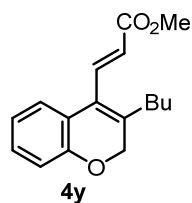

**4y**: Light yellow oil. (0.3 mmol scale, 58.9 mg, 72% yield).  $R_f$  = 0.45 (hexane/ethyl acetate = 10:1). **<sup>1</sup>H NMR** (400 MHz, Acetone-*d*<sub>6</sub>)  $\delta$  7.65 (d,  $J$  = 16.2 Hz, 1H), 7.27 (dd,  $J$  = 7.7, 1.6 Hz, 1H), 7.17 (ddd,  $J$  = 8.0, 7.4, 1.6 Hz, 1H), 6.96 (td,  $J$  = 7.6, 1.3 Hz, 1H), 6.87 (dd,  $J$  = 8.0, 1.2 Hz, 1H), 6.13 (d,  $J$  = 16.2 Hz, 1H), 4.64 (s, 2H), 3.76 (s, 3H), 2.45 – 2.33 (m, 2H), 1.56 – 1.31 (m, 4H), 0.93 (t,  $J$  = 7.3 Hz, 3H). **<sup>13</sup>C NMR** (101 MHz, Acetone-*d*<sub>6</sub>)  $\delta$  205.24, 166.38, 154.23, 138.99, 138.45, 128.57, 125.12, 124.92, 122.84, 122.64, 121.37, 116.09, 67.87, 50.98, 30.32, 30.23, 22.41, 13.26. **IR** (KBr,  $\text{cm}^{-1}$ ):  $\nu$  2956, 2930, 2860, 1720, 1634, 1488, 1457, 1273, 1241,

1171. **HRMS** (ESI): Calcd for  $C_{17}H_{21}O_3^+$  ( $M+H^+$ ): 273.1485, found: 273.1490.

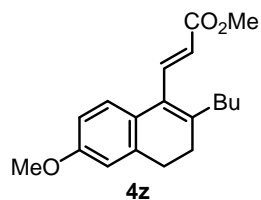

**4z**: Light yellow oil. (0.3 mmol scale, 70.2 mg, 78% yield).  $R_f = 0.45$  (hexane/ethyl acetate = 5:1).  **$^1H$  NMR** (400 MHz, Chloroform-*d*)  $\delta$  7.74 (d,  $J = 16.1$  Hz, 1H), 7.17 (d,  $J = 8.3$  Hz, 1H), 6.72 – 6.57 (m, 2H), 6.02 (d,  $J = 16.1$  Hz, 1H), 3.71 (d,  $J = 3.3$  Hz, 6H), 2.58 (dd,  $J = 8.7, 6.3$  Hz, 2H), 2.38 – 2.26 (m, 2H), 2.26 – 2.12 (m, 2H), 1.45 – 1.23 (m, 4H), 0.85 (t,  $J = 7.2$  Hz, 3H).  **$^{13}C$  NMR** (101 MHz, Chloroform-*d*)  $\delta$  168.07, 158.15, 144.81, 141.62, 138.36, 128.01, 126.97, 126.43, 120.28, 113.41, 110.82, 55.25, 51.56, 34.20, 31.08, 29.51, 28.75, 22.73, 14.05. **IR** (KBr,  $cm^{-1}$ ):  $\nu$  2953, 2932, 2859, 1719, 1618, 1499, 1433, 1295, 1253, 1168. **HRMS** (ESI): Calcd for  $C_{19}H_{25}O_3^+$  ( $M+H^+$ ): 301.1798, found: 301.1801.

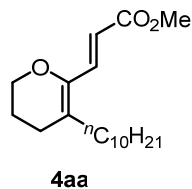

**4aa**: Light yellow oil. (0.3 mmol scale, 50.8 mg, 55% yield).  $R_f = 0.35$  (hexane/ethyl acetate = 10:1).  **$^1H$  NMR** (400 MHz, Methylene Chloride-*d*<sub>2</sub>)  $\delta$  7.47 (d,  $J = 15.2$  Hz, 1H), 6.06 (d,  $J = 15.2$  Hz, 1H), 4.04 – 3.92 (m, 2H), 3.72 (s, 3H), 2.28 – 2.13 (m, 4H), 1.94 – 1.80 (m, 2H), 1.43 (dd,  $J = 9.6, 5.6$  Hz, 2H), 1.29 (d,  $J = 7.8$  Hz, 14H), 0.89 (t,  $J = 6.7$  Hz, 3H).  **$^{13}C$  NMR** (101 MHz, Methylene Chloride-*d*<sub>2</sub>)  $\delta$  167.80, 144.45, 135.34, 122.96, 115.36, 65.38, 51.19, 32.01, 31.89, 29.58, 29.49, 29.33, 29.31, 29.21, 25.89, 22.66, 22.56, 13.85. **IR** (KBr,  $cm^{-1}$ ):  $\nu$  2926, 2855, 1719, 1629, 1298, 1263, 1164. **HRMS** (ESI): Calcd for  $C_{19}H_{33}O_3^+$  ( $M+H^+$ ): 309.2425, found: 309.2429.

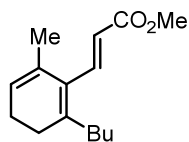

**4ab**

**4ab**: Light yellow oil. (0.3 mmol scale, 57.0 mg, 60% yield).  $R_f = 0.40$  (hexane/ethyl acetate = 10:1).  $^1\text{H NMR}$  (400 MHz, Methylene Chloride- $d_2$ )  $\delta$  7.43 (d,  $J = 16.2$  Hz, 1H), 5.70 (d,  $J = 16.1$  Hz, 1H), 5.59 – 5.49 (m, 1H), 3.64 (s, 3H), 2.22 – 2.14 (m, 2H), 2.04 (dd,  $J = 10.3, 7.1$  Hz, 2H), 1.95 – 1.85 (m, 2H), 1.71 (s, 3H), 1.42 – 1.31 (m, 2H), 1.27 – 1.13 (m, 15H), 0.83 – 0.75 (m, 3H).  $^{13}\text{C NMR}$  (101 MHz, Methylene Chloride- $d_2$ )  $\delta$  167.30, 144.74, 141.97, 132.02, 129.30, 121.97, 120.38, 51.24, 34.31, 31.92, 29.61, 29.59, 29.48, 29.34, 29.11, 28.95, 22.70, 22.21, 20.76, 13.89. **IR** (KBr,  $\text{cm}^{-1}$ ):  $\nu$  22925, 2854, 1724, 1619, 1435, 1295, 1266, 1194, 1166. **HRMS** (ESI): Calcd for  $\text{C}_{21}\text{H}_{35}\text{O}_2^+$  ( $\text{M}+\text{H}^+$ ): 319.2632, found: 319.2640.

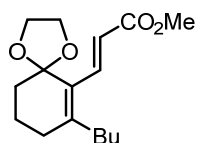

**4ac**

**4ac**: Light yellow oil. (0.3 mmol scale, 31.8 mg, 38% yield, run with the corresponding vinyl iodide instead of vinyl triflate).  $R_f = 0.20$  (hexane/ethyl acetate = 10:1).  $^1\text{H NMR}$  (400 MHz, )  $\delta$  7.45 (d,  $J = 16.2$  Hz, 1H), 5.94 (d,  $J = 16.2$  Hz, 1H), 4.09 – 3.92 (m, 4H), 3.71 (s, 3H), 2.20 (dt,  $J = 15.5, 6.6$  Hz, 4H), 1.82 – 1.64 (m, 4H), 1.50 – 1.28 (m, 4H), 0.91 (t,  $J = 7.2$  Hz, 3H).  $^{13}\text{C NMR}$  (101 MHz, )  $\delta$  167.65, 151.45, 151.44, 140.06, 128.34, 119.91, 107.79, 64.30, 51.19, 34.27, 33.33, 31.20, 30.79, 22.76, 19.84, 13.67. **IR** (KBr,  $\text{cm}^{-1}$ ):  $\nu$  2951, 2872, 1718, 1624, 1437, 1293, 1272, 1192, 1169. **HRMS** (ESI): Calcd for  $\text{C}_{16}\text{H}_{25}\text{O}_4^+$  ( $\text{M}+\text{H}^+$ ): 281.1747, found: 281.1752.

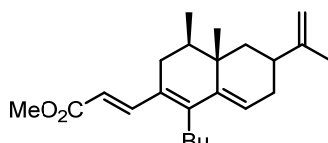

**4ad**

**4ad**: Light yellow oil. (0.3 mmol scale, 51.2 mg, 50% yield).  $R_f = 0.50$  (hexane/ethyl acetate = 10:1).  $^1\text{H NMR}$  (400 MHz, Methylene Chloride- $d_2$ )  $\delta$  7.80 (d,  $J = 15.6$  Hz, 1H), 5.97 (dd,  $J$

= 5.6, 2.9 Hz, 1H), 5.81 (d,  $J = 15.5$  Hz, 1H), 4.67 (s, 2H), 3.64 (s, 3H), 2.48 – 2.36 (m, 2H), 2.35 – 2.22 (m, 2H), 2.17 (dd,  $J = 17.6, 5.4$  Hz, 1H), 2.04 – 1.81 (m, 2H), 1.73 – 1.62 (m, 4H), 1.53 – 1.42 (m, 1H), 1.37 – 1.20 (m, 4H), 1.12 (t,  $J = 12.5$  Hz, 1H), 0.88 – 0.80 (m, 6H), 0.73 (s, 3H).  $^{13}\text{C}$  NMR (101 MHz, Methylene Chloride- $d_2$ )  $\delta$  167.97, 150.13, 143.44, 142.70, 142.40, 127.10, 124.98, 115.73, 108.37, 51.19, 41.12, 38.07, 36.58, 36.16, 32.92, 32.23, 32.13, 27.93, 22.88, 20.46, 16.94, 14.81, 13.75. IR (KBr,  $\text{cm}^{-1}$ ):  $\nu$  2955, 2930, 2876, 1719, 1600, 1433, 1297, 1192, 1159.

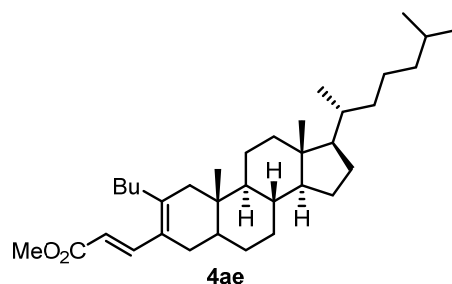

**4ae:** Viscous colorless liquid. (0.3 mmol scale, 117.4 mg, 77% yield).  $R_f = 0.55$  (hexane/ethyl acetate = 10:1).  $^1\text{H}$  NMR (400 MHz, Chloroform- $d$ )  $\delta$  7.83 (d,  $J = 15.5$  Hz, 1H), 5.80 (d,  $J = 15.5$  Hz, 1H), 3.75 (s, 3H), 2.43 – 2.31 (m, 1H), 2.20 – 1.96 (m, 4H), 1.95 – 1.77 (m, 3H), 1.75 – 1.67 (m, 1H), 1.63 – 1.46 (m, 4H), 1.45 – 0.98 (m, 21H), 0.95 – 0.91 (m, 6H), 0.88 (dd,  $J = 6.6, 1.9$  Hz, 6H), 0.68 (d,  $J = 5.2$  Hz, 6H).  $^{13}\text{C}$  NMR (101 MHz, Chloroform- $d$ )  $\delta$  142.40, 114.28, 56.44, 56.29, 53.77, 51.35, 46.20, 42.48, 41.21, 39.96, 39.53, 36.19, 35.82, 35.52, 34.57, 33.41, 31.67, 31.50, 30.33, 28.49, 28.23, 28.03, 24.22, 23.88, 22.85, 22.77, 22.59, 21.13, 18.72, 14.03, 12.01, 11.83. IR (KBr,  $\text{cm}^{-1}$ ):  $\nu$  2931, 2868, 1722, 1622, 1298, 1190, 1173, 1155. HRMS (ESI): Calcd for  $\text{C}_{35}\text{H}_{59}\text{O}_2^+$  ( $\text{M}+\text{H}^+$ ): 511.4510, found: 511.4519.

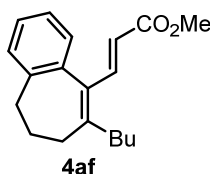

**4af:** Light yellow oil. (0.3 mmol scale, 49.4 mg, 58% yield).  $R_f = 0.50$  (hexane/ethyl acetate = 10:1).  $^1\text{H}$  NMR (400 MHz, Chloroform- $d$ )  $\delta$  7.98 (d,  $J = 15.5$  Hz, 1H), 7.25 – 7.14 (m, 4H), 5.69 (d,  $J = 15.5$  Hz, 1H), 3.72 (s, 3H), 2.60 – 2.41 (m, 4H), 2.14 – 2.00 (m, 2H), 2.00 – 1.91 (m, 2H), 1.59 – 1.38 (m, 4H), 0.97 (t,  $J = 7.2$  Hz, 3H).  $^{13}\text{C}$  NMR (101 MHz, Chloroform- $d$ )  $\delta$

168.46, 151.12, 141.74, 140.51, 137.91, 132.06, 128.98, 128.26, 127.20, 125.77, 118.47, 51.41, 34.07, 33.37, 31.95, 31.71, 31.45, 22.90, 14.06. **IR** (KBr,  $\text{cm}^{-1}$ ):  $\nu$  2932, 2858, 1717, 1615, 1452, 1434, 1293, 1260, 1168. **HRMS** (ESI): Calcd for  $\text{C}_{19}\text{H}_{25}\text{O}_2^+$  ( $\text{M}+\text{H}^+$ ): 285.1849, found: 285.1851.

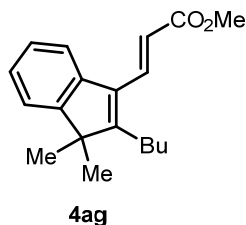

**4ag**: Light yellow oil. (0.3 mmol scale, 78.1 mg, 92% yield).  $R_f = 0.40$  (hexane/ethyl acetate = 10:1).  **$^1\text{H NMR}$**  (400 MHz, Chloroform-*d*)  $\delta$  7.81 (d,  $J = 16.3$  Hz, 1H), 7.62 – 7.55 (m, 1H), 7.33 (ddd,  $J = 7.2, 1.5, 0.6$ , 1H), 7.27 (td,  $J = 7.3, 1.2$  Hz, 1H), 7.22 (td,  $J = 7.3, 1.2$  Hz, 1H), 6.53 (d,  $J = 16.3$  Hz, 1H), 3.83 (s, 3H), 2.54 – 2.45 (m, 2H), 1.66 – 1.38 (m, 4H), 1.29 (s, 6H), 0.97 (t,  $J = 7.1$  Hz, 3H).  **$^{13}\text{C NMR}$**  (101 MHz, Chloroform-*d*)  $\delta$  168.16, 164.99, 152.71, 140.35, 137.57, 130.28, 126.64, 125.19, 121.47, 120.40, 118.19, 51.67, 50.79, 32.80, 26.03, 24.43, 23.48, 13.87. **IR** (KBr,  $\text{cm}^{-1}$ ):  $\nu$  2958, 2932, 2863, 1721, 1631, 1434, 1311, 1276. **HRMS** (ESI): Calcd for  $\text{C}_{19}\text{H}_{25}\text{O}_2^+$  ( $\text{M}+\text{H}^+$ ): 285.1849, found: 285.1858.

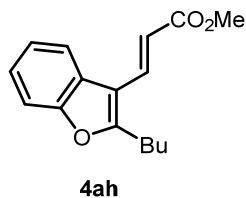

**4ah**: Light yellow oil. (0.3 mmol scale, 37.1 mg, 48% yield).  $R_f = 0.30$  (hexane/ethyl acetate = 10:1).  **$^1\text{H NMR}$**  (400 MHz, Chloroform-*d*)  $\delta$  7.84 – 7.75 (m, 2H), 7.49 – 7.42 (m, 1H), 7.33 – 7.27 (m, 2H), 6.53 (d,  $J = 16.0$  Hz, 1H), 3.83 (s, 3H), 2.97 – 2.87 (m, 2H), 1.80 – 1.69 (m, 2H), 1.47 – 1.35 (m, 2H), 0.95 (t,  $J = 7.3$  Hz, 3H).  **$^{13}\text{C NMR}$**  (101 MHz, Chloroform-*d*)  $\delta$  167.99, 163.00, 154.37, 135.38, 126.05, 124.38, 123.50, 120.48, 116.25, 112.25, 111.24, 51.65, 30.39, 26.57, 22.37, 13.79. **IR** (KBr,  $\text{cm}^{-1}$ ):  $\nu$  2956, 2930, 2872, 1720, 1637, 1435, 1300, 1273, 1171. **HRMS** (ESI): Calcd for  $\text{C}_{16}\text{H}_{19}\text{O}_3^+$  ( $\text{M}+\text{H}^+$ ): 259.1329, found: 259.1338.



*General procedure for acyclic vinyl bromide substrates*

An oven-dried 8.0 mL vial was charged with Pd(cod)Cl<sub>2</sub> (8.6 mg, 0.03 mmol, 0.10 equiv) and Ph-DavePhos (11.4 mg, 0.03 mmol, 0.10 equiv). The vial was partially capped and transferred in a nitrogen-filled glovebox. In the glovebox, 1,4-dioxane (1 mL) was addition and the mixture was stirred for 1 min. Vinyl bromide **5** (0.30 mmol, 1.0 equiv), alkyl iodide **2** (0.9 mmol, 3.0 equiv), olefin **3** (0.45 mmol, 1.5 equiv), **N11** (22.7 mg, 0.15 mmol, 0.50 equiv), 5-(trifluoromethyl)2-pyridinol (9.8 mg, 0.06 mmol, 0.20 equiv), K<sub>3</sub>PO<sub>4</sub> (191 mg, 0.9 mmol, 3.0 equiv), and additional 1,4-dioxane (2 mL) and toluene (3 mL) were added to the vial. The vial was tightly sealed, transferred out of glovebox and stirred on a pie-block preheated to 100 °C for 16 h. Upon completion of the reaction, the mixture was filtered through a thin pad of silica gel. The filter cake was washed with ethyl acetate, and the combined filtrate was concentrated. The residue was directly purified by flash column chromatography on silica gel to yield the desired product. (Note: an accurate Pd/ligand ratio and good solvent quality are important for the reproducibility.)

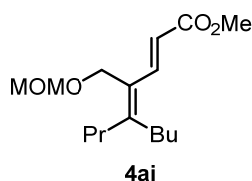

**4ai**: Light yellow oil. (0.3 mmol scale, 44.5 mg, 52% yield).  $R_f = 0.45$  (hexane/ethyl acetate = 5:1). <sup>1</sup>H NMR (400 MHz, Chloroform-*d*)  $\delta$  7.77 (d,  $J = 15.7$  Hz, 1H), 6.05 (d,  $J = 15.7$  Hz, 1H), 4.64 (s, 2H), 4.27 (s, 2H), 3.75 (s, 3H), 3.41 (s, 3H), 2.39 – 2.30 (m, 2H), 2.29 – 2.21 (m, 2H), 1.54 – 1.30 (m, 6H), 0.94 (dt,  $J = 8.3, 7.1$  Hz, 6H). <sup>13</sup>C NMR (101 MHz, Chloroform-*d*)  $\delta$  168.36, 156.22, 141.93, 126.99, 116.60, 95.70, 62.86, 55.57, 51.47, 36.10, 32.77, 31.93, 22.96, 22.62, 14.40, 13.94. IR (KBr, cm<sup>-1</sup>):  $\nu$  2957, 2931, 2872, 1623, 1582, 1559, 1467, 1429. HRMS (ESI): Calcd for C<sub>16</sub>H<sub>28</sub>O<sub>4</sub>Na<sup>+</sup> (M+Na<sup>+</sup>): 307.1880, found: 307.1890.

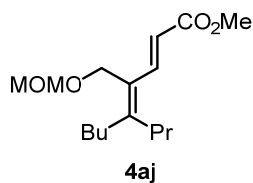

**4aj:** Light yellow oil. (0.3 mmol scale, 42.5 mg, 50% yield).  $R_f = 0.45$  (hexane/ethyl acetate = 5:1).  $^1\text{H NMR}$  (400 MHz, Chloroform-*d*)  $\delta$  7.69 (d,  $J = 15.7$  Hz, 1H), 5.97 (d,  $J = 15.7$  Hz, 1H), 4.57 (s, 2H), 4.20 (s, 2H), 3.68 (s, 3H), 3.34 (s, 3H), 2.32 – 2.15 (m, 4H), 1.49 – 1.37 (m, 2H), 1.37 – 1.21 (m, 4H), 0.89 (t,  $J = 7.3$  Hz, 3H), 0.85 (t,  $J = 7.0$  Hz, 3H).  $^{13}\text{C NMR}$  (101 MHz, Chloroform-*d*)  $\delta$  168.38, 156.26, 141.96, 127.02, 116.56, 95.70, 62.87, 55.57, 51.47, 35.04, 33.86, 31.55, 23.09, 22.97, 14.35, 13.94. **IR** (KBr,  $\text{cm}^{-1}$ ):  $\nu$  2957, 2930, 2874, 1719, 1619, 1435, 1313, 1288, 1176, 1160, 1150. **HRMS** (ESI): Calcd for  $\text{C}_{16}\text{H}_{28}\text{O}_4\text{Na}^+$  ( $\text{M}+\text{Na}^+$ ): 307.1880, found: 307.1885.

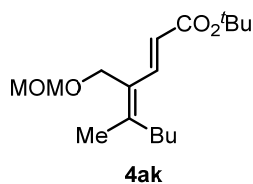

**4ak:** Light yellow oil. (0.3 mmol scale, 47.2 mg, 53% yield).  $R_f = 0.45$  (hexane/ethyl acetate = 5:1).  $^1\text{H NMR}$  (400 MHz, Chloroform-*d*)  $\delta$  7.71 (d,  $J = 15.7$  Hz, 1H), 5.95 (d,  $J = 15.7$  Hz, 1H), 4.63 (s, 2H), 4.29 (s, 2H), 3.41 (s, 3H), 2.41 – 2.28 (m, 2H), 1.98 (s, 3H), 1.49 (s, 9H), 1.47 – 1.30 (m, 4H), 0.92 (t,  $J = 7.2$  Hz, 3H).  $^{13}\text{C NMR}$  (101 MHz, Chloroform-*d*)  $\delta$  167.32, 151.09, 140.35, 126.85, 118.56, 95.44, 79.91, 62.90, 55.46, 34.67, 30.97, 28.23, 22.77, 20.30, 13.96. **IR** (KBr,  $\text{cm}^{-1}$ ):  $\nu$  2925, 2855, 1722, 1619, 1434, 1305, 1192, 1162. **HRMS** (ESI): Calcd for  $\text{C}_{18}\text{H}_{33}\text{O}_2^+$  ( $\text{M}+\text{H}^+$ ): 281.2475, found: 281.2483. **IR** (KBr,  $\text{cm}^{-1}$ ):  $\nu$  2958, 2932, 2875, 1706, 1621, 1367, 1311, 1283, 1149. **HRMS** (ESI): Calcd for  $\text{C}_{17}\text{H}_{30}\text{O}_4\text{Na}^+$  ( $\text{M}+\text{Na}^+$ ): 321.2036, found: 321.2039.

Note: the stereochemistry of **4ak** was confirmed by the NOESY experiment.

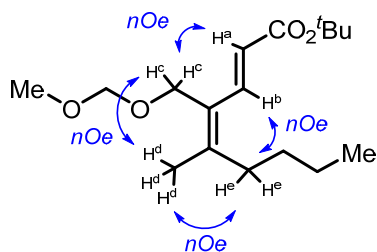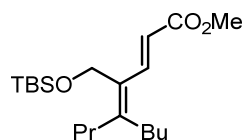

**4al**

**4al:** Light yellow oil. (0.3 mmol scale, 48.9 mg, 46% yield).  $R_f = 0.15$  (hexane/ethyl acetate = 20:1). **<sup>1</sup>H NMR** (400 MHz, Chloroform-*d*)  $\delta$  7.65 (d,  $J = 15.7$  Hz, 1H), 5.96 (d,  $J = 15.7$  Hz, 1H), 4.25 (s, 2H), 3.67 (s, 3H), 2.26 – 2.18 (m, 2H), 2.17 – 2.09 (m, 2H), 1.47 – 1.20 (m, 7H), 0.88 – 0.82 (m, 6H), 0.81 (s, 9H), 0.00 (s, 6H). **<sup>13</sup>C NMR** (101 MHz, Chloroform-*d*)  $\delta$  168.60, 153.55, 142.15, 130.14, 116.49, 58.96, 51.40, 36.14, 32.70, 31.78, 25.90, 22.92, 22.65, 18.29, 14.42, 13.94, -5.21. **IR** (KBr, cm<sup>-1</sup>):  $\nu$  2957, 2931, 2859, 1720, 1619, 1435, 1307, 1257, 1176, 1158. **HRMS** (ESI): Calcd for C<sub>20</sub>H<sub>39</sub>O<sub>3</sub>Si<sup>+</sup> (M+H<sup>+</sup>): 355.2663, found: 355.2659.

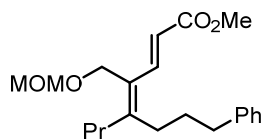

**4am**

**4am:** Light yellow oil. (0.3 mmol scale, 52.0 mg, 50% yield).  $R_f = 0.45$  (hexane/ethyl acetate = 5:1). **<sup>1</sup>H NMR** (400 MHz, Chloroform-*d*)  $\delta$  7.72 (d,  $J = 15.7$  Hz, 1H), 7.33 – 7.27 (m, 2H), 7.19 (ddt,  $J = 8.2, 3.4, 1.5$  Hz, 3H), 6.05 (d,  $J = 15.7$  Hz, 1H), 4.63 (s, 2H), 4.26 (s, 2H), 3.76 (s, 3H), 3.40 (s, 3H), 2.67 (t,  $J = 7.7$  Hz, 2H), 2.41 – 2.32 (m, 2H), 2.31 – 2.21 (m, 2H), 1.78 (td,  $J = 9.5, 6.8, 5.6$  Hz, 2H), 1.52 – 1.36 (m, 2H), 0.92 (t,  $J = 7.3$  Hz, 3H). **<sup>13</sup>C NMR** (101 MHz, Chloroform-*d*)  $\delta$  168.25, 155.43, 141.74, 141.66, 128.38, 128.35, 127.37, 125.89, 116.98, 95.68, 62.81, 55.59, 51.50, 36.01, 35.99, 32.63, 31.23, 22.58, 14.36. **IR** (KBr, cm<sup>-1</sup>):  $\nu$  2961, 2927, 2874, 2855, 1717, 1653, 1617. **HRMS** (ESI): Calcd for C<sub>21</sub>H<sub>30</sub>O<sub>4</sub>Na<sup>+</sup> (M+Na<sup>+</sup>): 369.2036, found: 369.2040.

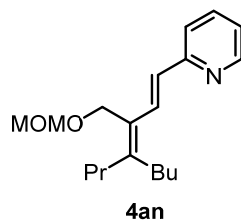

**4an**: Light yellow oil. (0.3 mmol scale, 28.8 mg, 32% yield).  $R_f = 0.20$  (hexane/ethyl acetate = 5:1).  $^1\text{H NMR}$  (400 MHz, Chloroform- $d$ )  $\delta$  8.55 (dt,  $J = 3.9, 1.0$  Hz, 1H), 7.67 (d,  $J = 15.9$  Hz, 1H), 7.60 (td,  $J = 7.7, 1.8$  Hz, 1H), 7.30 (d,  $J = 7.9$  Hz, 1H), 7.07 (ddd,  $J = 7.5, 4.9, 1.1$  Hz, 1H), 6.79 (d,  $J = 15.9$  Hz, 1H), 4.70 (s, 2H), 4.40 (s, 2H), 3.45 (s, 3H), 2.46 – 2.32 (m, 2H), 2.31 – 2.21 (m, 2H), 1.58 – 1.32 (m, 6H), 0.95 (td,  $J = 7.2, 6.3$  Hz, 6H).  $^{13}\text{C NMR}$  (101 MHz, Chloroform- $d$ )  $\delta$  156.77, 150.35, 149.54, 136.23, 130.26, 127.69, 127.15, 121.48, 121.35, 95.66, 63.22, 55.53, 35.89, 32.59, 31.80, 23.06, 22.76, 14.42, 14.07. **IR** (KBr,  $\text{cm}^{-1}$ ):  $\nu$  2957, 2931, 2872, 1623, 1582, 1559, 1467, 1429. **HRMS** (ESI): Calcd for  $\text{C}_{17}\text{H}_{26}\text{NO}_2^+$  ( $\text{M}+\text{H}^+$ ): 276.1958, found: 276.1963.

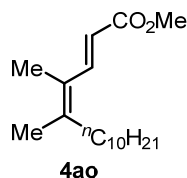

**4ao**: Light yellow oil. (0.3 mmol scale, 27.2 mg, 33% yield).  $R_f = 0.40$  (hexane/ethyl acetate = 10:1).  $^1\text{H NMR}$  (400 MHz, Methylene Chloride- $d_2$ )  $\delta$  7.72 (d,  $J = 15.4$  Hz, 1H), 5.67 (d,  $J = 15.5$  Hz, 1H), 3.58 (s, 3H), 2.23 – 2.17 (m, 2H), 1.74 (s, 3H), 1.66 (s, 3H), 1.34 – 1.24 (m, 2H), 1.20 – 1.11 (m, 14H), 0.79 – 0.72 (m, 3H).  $^{13}\text{C NMR}$  (101 MHz, Methylene Chloride- $d_2$ )  $\delta$  168.14, 146.50, 143.15, 125.86, 114.99, 51.13, 34.56, 31.90, 29.61, 29.59, 29.52, 29.51, 29.33, 29.03, 22.68, 20.49, 13.95, 13.87. **IR** (KBr,  $\text{cm}^{-1}$ ):  $\nu$  2925, 2855, 1722, 1619, 1434, 1305, 1192, 1162. **HRMS** (ESI): Calcd for  $\text{C}_{18}\text{H}_{33}\text{O}_2^+$  ( $\text{M}+\text{H}^+$ ): 281.2475, found: 281.2483.

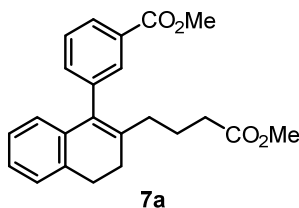

**7a**: Light yellow oil. (0.3 mmol scale, 76.4 mg, 70% yield, run with 0.45 mmol **6a** instead of

**3).**  $R_f = 0.30$  (hexane/ethyl acetate = 5:1).  $^1\text{H NMR}$  (400 MHz, Chloroform-*d*)  $\delta$  8.02 (dt,  $J = 7.8, 1.5$  Hz, 1H), 7.84 (td,  $J = 1.8, 0.5$  Hz, 1H), 7.49 (td,  $J = 7.7, 0.6$  Hz, 1H), 7.36 (dt,  $J = 7.6, 1.4$  Hz, 1H), 7.19 – 7.12 (m, 1H), 7.08 (td,  $J = 7.3, 1.4$  Hz, 1H), 7.00 (td,  $J = 7.6, 1.5$  Hz, 1H), 6.48 (dd,  $J = 7.7, 1.2$  Hz, 1H), 3.91 (s, 3H), 3.58 (s, 3H), 2.88 (t,  $J = 8.0$  Hz, 2H), 2.45 – 2.36 (m, 2H), 2.19 (t,  $J = 7.5$  Hz, 2H), 2.05 (t,  $J = 7.7$  Hz, 2H), 1.80 – 1.66 (m, 2H).  $^{13}\text{C NMR}$  (101 MHz, Chloroform-*d*)  $\delta$  173.75, 167.11, 139.91, 137.74, 136.42, 135.03, 134.88, 133.83, 131.34, 130.43, 128.54, 128.07, 127.14, 126.32, 126.27, 125.46, 52.13, 51.47, 33.94, 33.67, 28.41, 27.53, 23.41. **IR** (KBr,  $\text{cm}^{-1}$ ):  $\nu$  3021, 2950, 2884, 1724, 1437, 1260, 1197, 1111. **HRMS** (ESI): Calcd for  $\text{C}_{23}\text{H}_{35}\text{O}_4^+$  ( $\text{M}+\text{H}^+$ ): 365.1748, found: 365.1750.

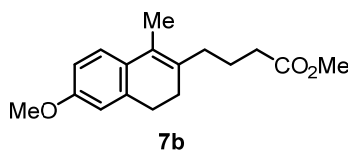

**7b:** Light yellow oil. (0.3 mmol scale, 43.3 mg, 53% yield, run with 0.45 mmol **6c** instead of **3**).  $R_f = 0.55$  (hexane/ethyl acetate = 5:1).  $^1\text{H NMR}$  (400 MHz, Chloroform-*d*)  $\delta$  7.16 (d,  $J = 8.5$  Hz, 1H), 6.72 (dd,  $J = 8.5, 2.8$  Hz, 1H), 6.68 (d,  $J = 2.7$  Hz, 1H), 3.79 (s, 3H), 3.66 (s, 3H), 2.73 – 2.66 (m, 2H), 2.34 (t,  $J = 7.5$  Hz, 2H), 2.32 – 2.25 (m, 2H), 2.19 (t,  $J = 8.4$  Hz, 2H), 1.99 (s, 3H), 1.80 (p,  $J = 7.6$  Hz, 2H).  $^{13}\text{C NMR}$  (101 MHz, Chloroform-*d*)  $\delta$  174.12, 157.76, 137.38, 132.76, 130.24, 125.62, 123.88, 113.20, 110.82, 55.26, 51.53, 33.58, 33.34, 29.09, 28.43, 23.59, 14.12. **IR** (KBr,  $\text{cm}^{-1}$ ):  $\nu$  2935, 2832, 1735, 1608, 1498, 1436, 1252. **HRMS** (ESI): Calcd for  $\text{C}_{17}\text{H}_{23}\text{O}_3^+$  ( $\text{M}+\text{H}^+$ ): 275.1642, found: 275.1641.

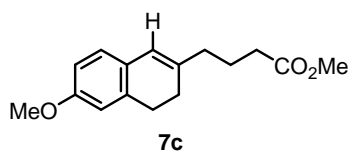

**7c:** Light yellow oil. (0.3 mmol scale, 28.6 mg, 37% yield, run with 0.45 mmol **6b** instead of **3**).  $R_f = 0.55$  (hexane/ethyl acetate = 5:1).  $^1\text{H NMR}$  (400 MHz, Chloroform-*d*)  $\delta$  6.87 – 6.80 (m, 1H), 6.64 – 6.55 (m, 2H), 6.09 (s, 1H), 3.71 (s, 3H), 3.59 (s, 3H), 2.70 (t,  $J = 8.1$  Hz, 2H), 2.27 (t,  $J = 7.5$  Hz, 2H), 2.13 (t,  $J = 7.4$  Hz, 4H), 1.77 (p,  $J = 7.5$  Hz, 2H).  $^{13}\text{C NMR}$  (101 MHz, Chloroform-*d*)  $\delta$  174.11, 158.15, 137.98, 136.11, 127.92, 126.29, 122.31, 113.51, 111.07, 55.28, 51.53, 36.63, 33.51, 28.64, 26.90, 22.79. **IR** (KBr,  $\text{cm}^{-1}$ ):  $\nu$  2948, 2832, 1737, 1607, 1499,

1434, 1297, 1251, 1160. **HRMS** (ESI): Calcd for C<sub>16</sub>H<sub>21</sub>O<sub>3</sub><sup>+</sup> (M+H<sup>+</sup>): 261.1485, found: 261.1490.

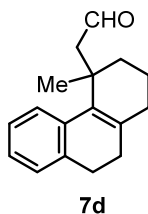

**7d**: Light yellow oil. (0.3 mmol scale, 60.6 mg, 84% yield, run with 0.9 mmol **6d** instead of **2** and **3**).  $R_f = 0.25$  (hexane/ethyl acetate = 20:1). **<sup>1</sup>H NMR** (400 MHz, Methylene Chloride-*d*<sub>2</sub>)  $\delta$  9.33 (dd,  $J = 4.0, 2.0$  Hz, 1H), 7.41 (dd,  $J = 7.9, 1.1$  Hz, 1H), 7.11 – 7.02 (m, 2H), 6.98 (td,  $J = 7.3, 1.2$  Hz, 1H), 2.92 (dd,  $J = 15.7, 2.1$  Hz, 1H), 2.56 – 2.46 (m, 2H), 2.34 (dd,  $J = 15.7, 4.0$  Hz, 1H), 2.30 – 2.16 (m, 1H), 2.16 – 1.98 (m, 2H), 1.98 – 1.87 (m, 1H), 1.76 – 1.52 (m, 4H), 1.45 (s, 3H). **<sup>13</sup>C NMR** (101 MHz, Methylene Chloride-*d*<sub>2</sub>)  $\delta$  203.63, 138.66, 137.92, 134.48, 132.39, 127.58, 125.64, 125.46, 124.76, 53.12, 40.65, 35.26, 31.94, 30.05, 28.96, 27.73, 18.27. **IR** (KBr, cm<sup>-1</sup>):  $\nu$  2931, 2885, 2827, 1719, 1481, 1451, 1426. **HRMS** (ESI): Calcd for C<sub>17</sub>H<sub>21</sub>O<sub>3</sub><sup>+</sup> (M+H<sup>+</sup>): 241.1587, found: 241.1594.

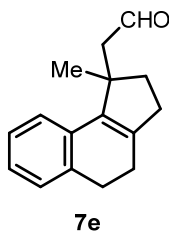

**7e**: Light yellow oil. (0.3 mmol scale, 39.5 mg, 58% yield, run with 0.9 mmol **6e** instead of **2** and **3**).  $R_f = 0.25$  (hexane/ethyl acetate = 20:1). **<sup>1</sup>H NMR** (400 MHz, Chloroform-*d*)  $\delta$  9.66 (d,  $J = 2.2$  Hz, 1H), 7.35 – 7.30 (m, 1H), 7.20 – 7.14 (m, 2H), 7.13 – 7.07 (m, 1H), 2.90 – 2.77 (m, 3H), 2.69 (dd,  $J = 14.9, 4.1$  Hz, 1H), 2.56 – 2.33 (m, 2H), 2.28 (ddt,  $J = 9.4, 8.0, 1.5$  Hz, 2H), 2.11 (ddd,  $J = 12.8, 8.5, 6.3$  Hz, 1H), 1.92 (ddd,  $J = 12.8, 8.6, 5.4$  Hz, 1H), 1.46 (s, 3H). **<sup>13</sup>C NMR** (101 MHz, Chloroform-*d*)  $\delta$  203.73, 142.21, 137.69, 136.66, 132.44, 128.12, 126.26, 126.08, 122.07, 52.64, 47.51, 39.06, 33.52, 29.13, 26.35, 24.97. **IR** (KBr, cm<sup>-1</sup>):  $\nu$  2928, 2833, 1720, 1485, 1451, 1384, 1317. **HRMS** (ESI): Calcd for C<sub>16</sub>H<sub>19</sub>O<sub>3</sub><sup>+</sup> (M+H<sup>+</sup>): 227.1430, found: 227.1436.

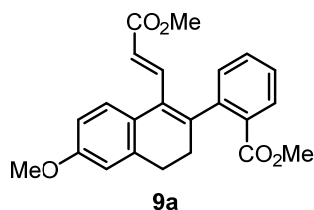

**9a:** Light yellow oil. (0.3 mmol scale, 70.1 mg, 62% yield, run with 0.6 mmol **8a** instead of **2**).  $R_f = 0.25$  (hexane/ethyl acetate = 5:1).  $^1\text{H NMR}$  (400 MHz, Chloroform-*d*)  $\delta$  8.02 (dd,  $J = 7.9$ , 1.0 Hz, 1H), 7.54 (td,  $J = 7.5$ , 1.4 Hz, 1H), 7.45 – 7.38 (m, 2H), 7.35 (d,  $J = 16.2$  Hz, 1H), 7.19 (dd,  $J = 7.6$ , 0.9 Hz, 1H), 6.82 (d,  $J = 2.7$  Hz, 1H), 6.78 (dd,  $J = 8.5$ , 2.8 Hz, 1H), 6.05 (d,  $J = 16.1$  Hz, 1H), 3.86 (s, 3H), 3.81 (s, 3H), 3.68 (s, 3H), 3.10 – 2.97 (m, 1H), 2.85 – 2.73 (m, 1H), 2.69 – 2.59 (m, 1H), 2.59 – 2.44 (m, 1H).  $^{13}\text{C NMR}$  (101 MHz, Chloroform-*d*)  $\delta$  167.71, 167.13, 158.69, 144.59, 143.23, 142.03, 139.00, 132.29, 130.87, 129.66, 129.42, 129.02, 127.54, 126.87, 126.40, 120.38, 113.66, 110.88, 55.31, 52.18, 51.45, 31.78, 28.85. **IR** (KBr,  $\text{cm}^{-1}$ ):  $\nu$  2949, 2837, 1723, 1610, 1500, 1433, 1293, 1257, 1170. **HRMS** (ESI): Calcd for  $\text{C}_{23}\text{H}_{23}\text{O}_5^+$  ( $\text{M}+\text{H}^+$ ): 379.1540, found: 379.1550.

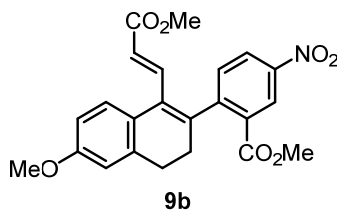

**9b:** Yellow oil. (0.3 mmol scale, 45.5 mg, 36% yield, run with 0.6 mmol **8b** instead of **2**).  $R_f = 0.20$  (hexane/ethyl acetate = 5:1).  $^1\text{H NMR}$  (400 MHz, Methylene Chloride-*d*<sub>2</sub>)  $\delta$  8.71 (d,  $J = 2.4$  Hz, 1H), 8.26 (dd,  $J = 8.4$ , 2.5 Hz, 1H), 7.33 (d,  $J = 8.4$  Hz, 1H), 7.25 (d,  $J = 8.5$  Hz, 1H), 7.13 (d,  $J = 16.0$  Hz, 1H), 6.73 (d,  $J = 2.7$  Hz, 1H), 6.68 (dd,  $J = 8.6$ , 2.7 Hz, 1H), 5.88 (d,  $J = 16.1$  Hz, 1H), 3.76 (s, 3H), 3.74 (s, 3H), 3.55 (s, 3H), 2.91 (ddd,  $J = 15.9$ , 10.4, 5.9 Hz, 1H), 2.72 (dt,  $J = 14.7$ , 6.9 Hz, 1H), 2.53 (dt,  $J = 13.9$ , 6.7 Hz, 1H), 2.41 (ddd,  $J = 16.2$ , 10.4, 5.8 Hz, 1H).  $^{13}\text{C NMR}$  (101 MHz, Methylene Chloride-*d*<sub>2</sub>)  $\delta$  166.82, 165.20, 159.25, 149.82, 146.82, 140.90, 140.46, 138.89, 131.38, 131.13, 130.28, 126.93, 126.50, 125.81, 125.79, 122.46, 113.65, 111.01, 55.26, 52.71, 51.41, 31.03, 28.52. **IR** (KBr,  $\text{cm}^{-1}$ ):  $\nu$  2950, 2837, 1722, 1606, 1524, 1434, 1349, 1255, 1170, 1138, 1123. **HRMS** (ESI): Calcd for  $\text{C}_{23}\text{H}_{22}\text{NO}_7^+$  ( $\text{M}+\text{H}^+$ ): 424.1391, found: 424.1390.

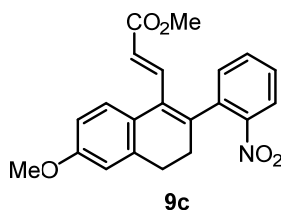

**9c**: Yellow oil. (0.3 mmol scale, 43.8 mg, 40% yield, run with 0.6 mmol **8c** instead of **2**).  $R_f = 0.25$  (hexane/ethyl acetate = 5:1).  $^1\text{H NMR}$  (400 MHz, Methylene Chloride- $d_2$ )  $\delta$  7.99 (dd,  $J = 8.2, 1.1$  Hz, 1H), 7.57 (td,  $J = 7.5, 1.3$  Hz, 1H), 7.43 (ddd,  $J = 8.2, 7.4, 1.5$  Hz, 1H), 7.29 – 7.20 (m, 2H), 7.16 (dt,  $J = 16.1, 1.0$  Hz, 1H), 6.74 – 6.70 (m, 1H), 6.67 (dd,  $J = 8.5, 2.8$  Hz, 1H), 5.89 (d,  $J = 16.1$  Hz, 1H), 3.74 (s, 3H), 3.55 (s, 3H), 2.91 (ddd,  $J = 15.8, 10.5, 5.8$  Hz, 1H), 2.71 (ddd,  $J = 14.6, 7.9, 5.8$  Hz, 1H), 2.62 – 2.46 (m, 1H), 2.41 (ddd,  $J = 15.8, 10.2, 5.5$  Hz, 1H).  $^{13}\text{C NMR}$  (101 MHz, Methylene Chloride- $d_2$ )  $\delta$  166.95, 159.16, 147.95, 140.84, 139.25, 138.88, 137.20, 133.55, 131.14, 130.38, 128.60, 126.91, 125.81, 124.85, 122.03, 113.61, 110.99, 55.25, 51.38, 30.66, 28.59. **IR** (KBr,  $\text{cm}^{-1}$ ):  $\nu$  2948, 2847, 2839, 1717, 1606, 1524, 1500, 1434, 1346, 1253, 1171. **HRMS** (ESI): Calcd for  $\text{C}_{21}\text{H}_{20}\text{NO}_5^+$  ( $\text{M}+\text{H}^+$ ): 366.1336, found: 366.1337.

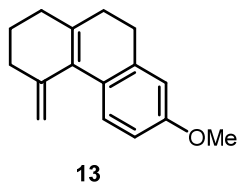

**13**: White solid. Melting point = 68–69 °C. (0.3 mmol scale, 54.4 mg, 80% yield, run with 0.9 mmol **12** instead of **2** and **3**).  $R_f = 0.60$  (hexane/ethyl acetate = 5:1).  $^1\text{H NMR}$  (400 MHz, Methylene Chloride- $d_2$ )  $\delta$  7.42 (d,  $J = 8.5$  Hz, 1H), 6.69 (d,  $J = 2.8$  Hz, 1H), 6.64 (dd,  $J = 8.5, 2.8$  Hz, 1H), 5.04 (d,  $J = 1.9$  Hz, 1H), 4.97 (s, 1H), 3.75 (s, 3H), 2.65 – 2.55 (m, 2H), 2.44 – 2.36 (m, 2H), 2.32 (t,  $J = 6.4$  Hz, 2H), 2.10 (t,  $J = 7.5$  Hz, 2H), 1.83 (tt,  $J = 8.9, 5.1$  Hz, 2H).  $^{13}\text{C NMR}$  (101 MHz, Methylene Chloride- $d_2$ )  $\delta$  157.52, 142.62, 139.01, 136.29, 129.32, 126.88, 126.55, 113.11, 110.12, 109.23, 55.03, 34.51, 31.68, 30.26, 28.62, 24.20. **IR** (KBr,  $\text{cm}^{-1}$ ):  $\nu$  2932, 2860, 2830, 1608, 1497, 1429, 1302, 1279, 1251, 1158. **HRMS** (ESI): Calcd for  $\text{C}_{16}\text{H}_{19}\text{O}^+$  ( $\text{M}+\text{H}^+$ ): 227.1430, found: 227.1438.



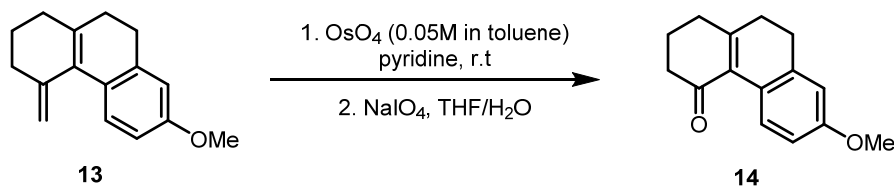

Following a reported procedure: To a solution of **13** (11.3 mg, 0.05 mmol) in 4 mL dry pyridine was added a solution of OsO<sub>4</sub> in toluene (0.05 M, 1.1 mL, 0.055 mmol). The dark reaction mixture was stirred overnight. Aqueous NaHSO<sub>3</sub> solution was added. After further reaction for 90 min, the mixture was diluted with water and extracted with CHCl<sub>3</sub> (3 × 10 mL) and then with ethyl acetate (3 × 10 mL). Drying over MgSO<sub>4</sub> and evaporation of the solvent from the organic phase gave residue that can be used directly in the next step. To a solution of the above crude diol in 3 mL THF/H<sub>2</sub>O (1:1) was added NaIO<sub>4</sub> (11.8 mg, 0.055 mmol) at 0 °C. The solution was warmed to room temperature and stirred for additional 3 hours, and then diluted with ethyl acetate before it was quenched with aqueous Na<sub>2</sub>S<sub>2</sub>O solution. The organic layer was separated, washed with water and brine, dried over anhydrous MgSO<sub>4</sub>, filtered and concentrated. The residue was purified by flash column chromatography to afford **14** in 52% yield over two steps.

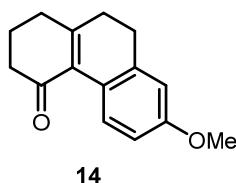

**14**: White solid. Melting point = 107–108 °C. (0.05 mmol scale, 5.9 mg, 52% yield).  $R_f$  = 0.25 (hexane/ethyl acetate = 5:1). **<sup>1</sup>H NMR** (400 MHz, Chloroform-*d*)  $\delta$  8.03 (d,  $J$  = 8.7 Hz, 1H), 6.76 (dd,  $J$  = 8.7, 2.8 Hz, 1H), 6.72 – 6.65 (m, 1H), 3.80 (s, 3H), 2.71 (t,  $J$  = 7.6 Hz, 2H), 2.60 – 2.50 (m, 4H), 2.46 – 2.32 (m, 2H), 2.03 (dq,  $J$  = 7.9, 6.2 Hz, 2H). **<sup>13</sup>C NMR** (101 MHz, Chloroform-*d*)  $\delta$  197.48, 158.31, 157.94, 137.58, 130.21, 128.35, 123.89, 113.27, 110.84, 55.22, 39.37, 32.13, 30.74, 27.83, 21.97. **IR** (KBr, cm<sup>-1</sup>):  $\nu$  2936, 2926, 1655, 1598, 1494, 1386, 1250. **HRMS** (ESI): Calcd for C<sub>15</sub>H<sub>17</sub>O<sub>2</sub><sup>+</sup> (M+H<sup>+</sup>): 229.1223, found: 229.1232.

Characterization of a typical side-product

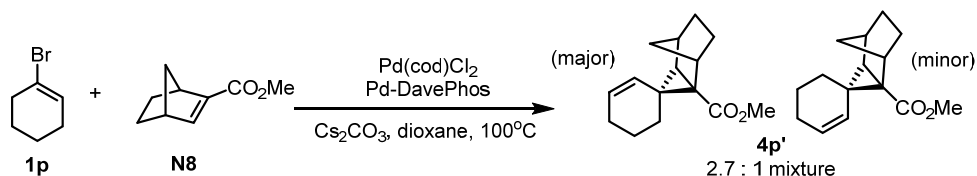

An oven-dried 8.0 mL vial was charged with  $\text{Pd}(\text{cod})\text{Cl}_2$  (8.6 mg, 0.03 mmol, 0.10 equiv), Ph-DavePhos (11.4 mg, 0.03 mmol, 0.10 equiv). The vial was partially capped and transferred in a nitrogen-filled glovebox. In the glovebox, 1,4-dioxane (1 mL) was addition and the mixture was stirred for 1 min. **1p** (53.1 mg, 0.33 mmol, 1.1 equiv), **N8** (45.6 mg, 0.3 mmol, 1.0 equiv),  $\text{Cs}_2\text{CO}_3$  (196 mg, 0.6 mmol, 2.0 equiv), and additional 1,4-dioxane (5 mL) were added to the vial. The vial was tightly sealed, transferred out of glovebox and stirred on a pie-block preheated to  $100^\circ\text{C}$  for 16 h. Upon completion of the reaction, the mixture was filtered through a thin pad of silica gel. The filter cake was washed with ethyl acetate, and the combined filtrate was concentrated. The residue was directly purified by flash column chromatography on silica gel to yield the desired product.

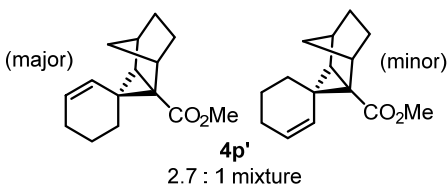

**4p'**: Colorless oil. (0.3 mmol scale, 50.6 mg, 73% yield)  $R_f = 0.25$  (hexane/ethyl acetate = 20:1). Isolated as an inseparable 2.7 : 1 mixture.

Major:  $^1\text{H NMR}$  (400 MHz, Chloroform-*d*)  $\delta$  5.86 (d,  $J = 10.2$ , 1H), 5.73 (dt,  $J = 10.2$ , 3.5, 1H), 3.67 (s, 3H), 2.71 – 2.74 (m, 1H), 2.47 – 2.42 (m, 1H), 2.15 – 1.99 (m, 2H), 1.81 – 1.60 (m, 3H), 1.60 – 1.35 (m, 4H), 1.36 – 1.18 (m, 3H), 0.83 (d,  $J = 11.1$ , 1H).  $^{13}\text{C NMR}$  (101 MHz, Chloroform-*d*)  $\delta$  173.4, 130.3, 128.5, 51.7, 41.6, 40.2, 39.6, 39.2, 36.8, 32.9, 31.2, 29.3, 29.0, 25.7, 22.2.

Minor:  $^1\text{H NMR}$  (400 MHz, Chloroform-*d*)  $\delta$  5.70 (dt,  $J = 10.3$ , 3.4, 1H), 5.16 (d,  $J = 10.3$ , 1H), 3.66 (s, 3H), 2.71 – 2.74 (m, 1H), 2.52 – 2.49 (m, 1H), 2.15 – 1.99 (m, 1H), 1.96 – 1.86 (m, 2H), 1.81 – 1.60 (m, 3H), 1.60 – 1.35 (m, 3H), 1.36 – 1.18 (m, 3H), 0.82 (d,  $J = 11.1$ , 1H).  $^{13}\text{C NMR}$  (101 MHz, Chloroform-*d*)  $\delta$  173.7, 132.4, 128.0, 51.7, 42.1, 40.2, 39.6, 39.2, 36.7, 33.1, 31.3, 29.3, 26.9, 24.5, 22.9.

**IR** (KBr,  $\text{cm}^{-1}$ ):  $\nu$  2950, 2877, 1726, 1434, 1308, 1247, 1226, 1189, 1149, 1111, 1083. **HRMS** (ESI): Calcd for  $\text{C}_{15}\text{H}_{21}\text{O}_2^+$  ( $\text{M}+\text{H}^+$ ): 233.1536, found: 233.1544.

The assignment of the major and minor structures was based on the following analysis:

1. The proton chemical shift for  $\text{H}_1$  in the major product is 5.86 ppm while that of the minor product ( $\text{H}_1'$ ) is 5.16 ppm. (*vide infra*)

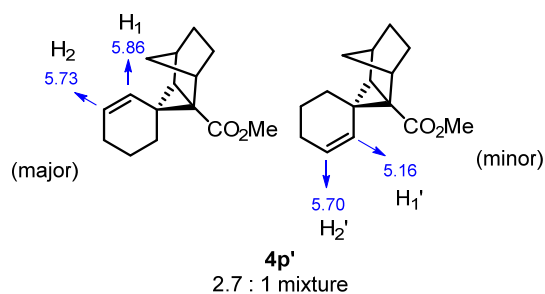

2. Based on NOESY, the  $\text{H}_1$  in the major component has nOe signals with the three protons highlighted below. The assignment of these three peaks were confirmed by COSY. In contrast, the  $\text{H}_1'$  in the minor component only has one nOe signal.

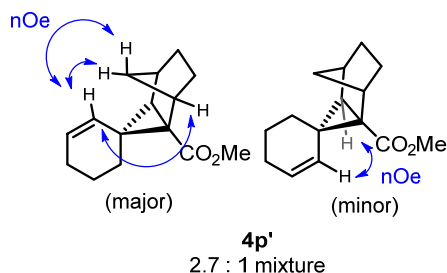

To further prove our structure, chemical shifts for the two structures were predicted at mPW1PW91/6-311+G(2d,p) (giao, smd)// B3LYP/6-31+G(d,p) (gas phase) level of theory, following a method described by Tantillo.<sup>20</sup> Calculated chemical shifts matched well with experimental data.

Calculated  $^1\text{H}$  NMR data

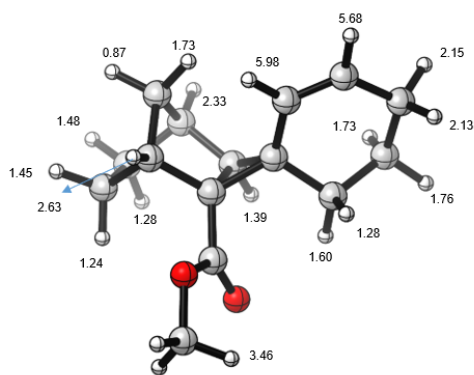

major

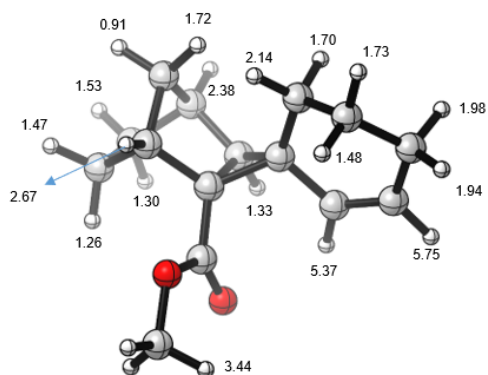

minor

Calculated  $^{13}\text{C}$  NMR data

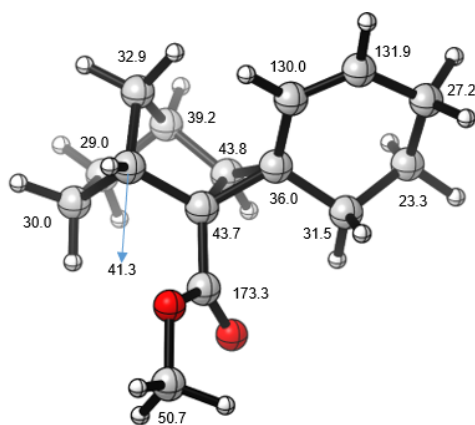

major

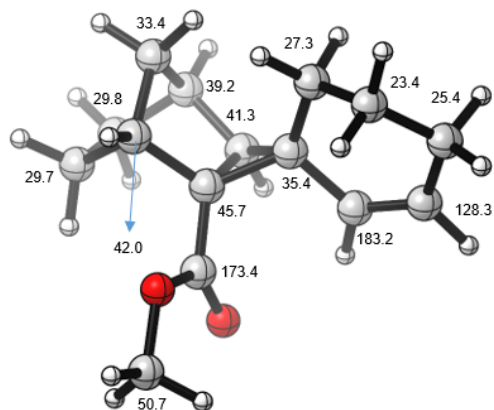

minor

### III. Kinetic Studies

#### General method

The reaction between vinyl triflate **5a**, butyl iodide **2a**, and methyl acrylate **3a** was selected as the model reaction for the kinetic studies (see the scheme below). The kinetics of the alkenyl Catellani reaction was monitored by  $^1\text{H}$  NMR. The reaction procedure was similar to that described in the general procedure section. Stock solutions of **5a**, **2a**, **3a**, **N11**, and 5-trifluoromethyl-2-pyridinol in 1,4-dioxane were prepared prior to use. Six identical reactions were set up in six different vials. For each reaction,  $\text{Pd}(\text{cod})\text{Cl}_2$ , **L1**, and  $\text{Cs}_2\text{CO}_3$  were weighted into a 4 mL vial, and indicated volume of the above stock solutions were added to the vial by syringe in the glovebox. The vials were transferred out of the glovebox and put into an aluminum block preheated to 100 °C. Timing was started and a vial was taken out of the pie-block every 20 min. The sampled reaction mixture was quickly filtered through a thin pad of silica gel. The filter cake was washed with ethyl acetate, and the combined filtrate was concentrated. The yields were determined by  $^1\text{H}$  NMR using dichloroethane as the internal standard.

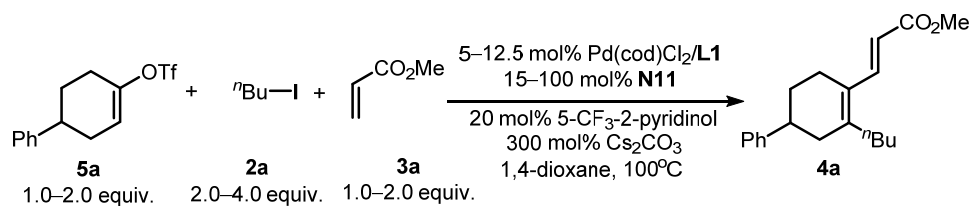

#### Dependence of initial rate on **5a**

Supplementary Table 1. Initial-Rate Dependence on [**5a**]

|                                                         |        |        |        |        |        |
|---------------------------------------------------------|--------|--------|--------|--------|--------|
| Equivalency of <b>5a</b>                                | 1.0    | 1.25   | 1.5    | 1.75   | 2.0    |
| [ <b>5a</b> ]/M                                         | 0.05   | 0.0625 | 0.075  | 0.0875 | 0.10   |
| [ <b>2a</b> ]/M                                         | 0.15   | 0.15   | 0.15   | 0.15   | 0.15   |
| [ <b>3a</b> ]/M                                         | 0.075  | 0.075  | 0.075  | 0.075  | 0.075  |
| [ <b>N11</b> ]/M                                        | 0.025  | 0.025  | 0.025  | 0.025  | 0.025  |
| [ $\text{Pd}(\text{cod})\text{Cl}_2$ ]/mM               | 5.0    | 5.0    | 5.0    | 5.0    | 5.0    |
| [ <b>L1</b> ]/mM                                        | 5.0    | 5.0    | 5.0    | 5.0    | 5.0    |
| [5- $\text{CF}_3$ -pyridinone]/M                        | 0.01   | 0.01   | 0.01   | 0.01   | 0.01   |
| $\text{Cs}_2\text{CO}_3/\text{mmol}\cdot\text{mL}^{-1}$ | 0.15   | 0.15   | 0.15   | 0.15   | 0.15   |
| initial rate/ $\text{mM}\cdot\text{min}^{-1}$           | 0.1648 | 0.1603 | 0.1596 | 0.1644 | 0.1571 |

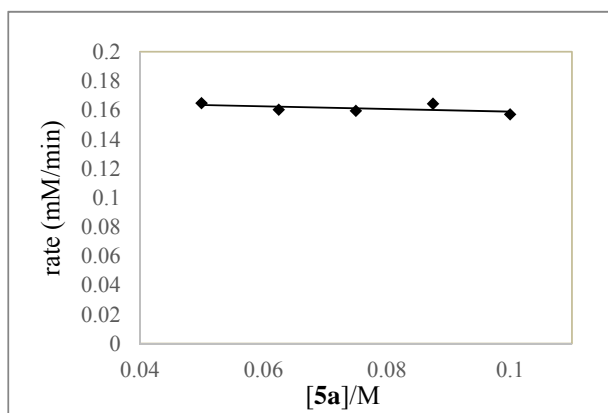

**Supplementary Figure 1.** Initial-rate dependence on [5a]. Conditions: [5a] = 0.05-0.10 M, [2a] = 0.15 M, [3a] = 0.075 M, [N11] = 0.025 M, [Pd(cod)Cl<sub>2</sub>] = 5.0 mM, [L1] = 5.0 mM, [5-CF<sub>3</sub>-pyridinone] = 0.01 M, Cs<sub>2</sub>CO<sub>3</sub> 0.15 mmol·mL<sup>-1</sup>.

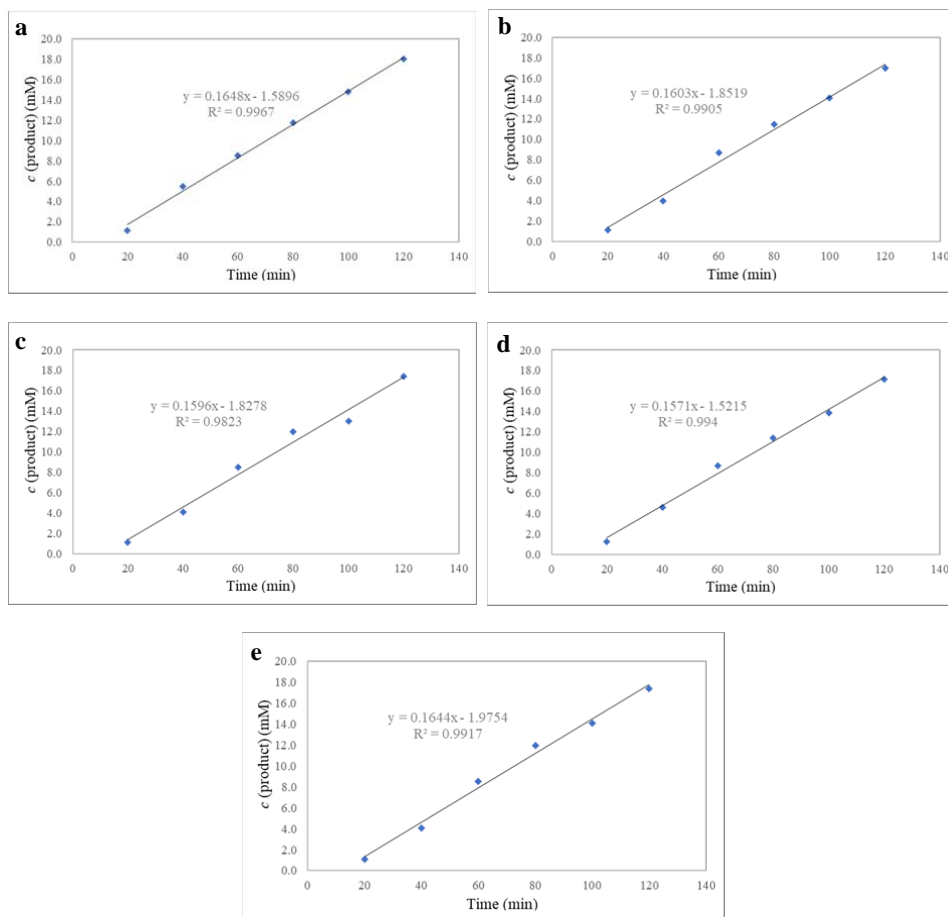

**Supplementary Figure 2.** Kinetic time courses for measuring initial-rate dependence on [5a].  
 a: [5a] = 0.05 M, b: [5a] = 0.0625 M, c: [5a] = 0.075 M, d: [5a] = 0.0875 M, e: [5a] = 0.10 M.

Dependence of initial rate on **2a**

**Supplementary Table 2.** Initial-Rate Dependence on [**2a**]

|                                                        |        |        |        |        |        |
|--------------------------------------------------------|--------|--------|--------|--------|--------|
| Equivalency of <b>2a</b>                               | 2.0    | 2.5    | 3.0    | 3.5    | 4.0    |
| [ <b>2a</b> ]/M                                        | 0.10   | 0.125  | 0.15   | 0.175  | 0.20   |
| [ <b>5a</b> ]/M                                        | 0.05   | 0.05   | 0.05   | 0.05   | 0.05   |
| [ <b>3a</b> ]/M                                        | 0.075  | 0.075  | 0.075  | 0.075  | 0.075  |
| [ <b>N11</b> ]/M                                       | 0.025  | 0.025  | 0.025  | 0.025  | 0.025  |
| [Pd(cod)Cl <sub>2</sub> ]/mM                           | 5.0    | 5.0    | 5.0    | 5.0    | 5.0    |
| [ <b>L1</b> ]/mM                                       | 5.0    | 5.0    | 5.0    | 5.0    | 5.0    |
| [5-CF <sub>3</sub> -pyridinone]/M                      | 0.01   | 0.01   | 0.01   | 0.01   | 0.01   |
| Cs <sub>2</sub> CO <sub>3</sub> /mmol·mL <sup>-1</sup> | 0.15   | 0.15   | 0.15   | 0.15   | 0.15   |
| initial rate/mM·min <sup>-1</sup>                      | 0.1642 | 0.1646 | 0.1648 | 0.1623 | 0.1659 |

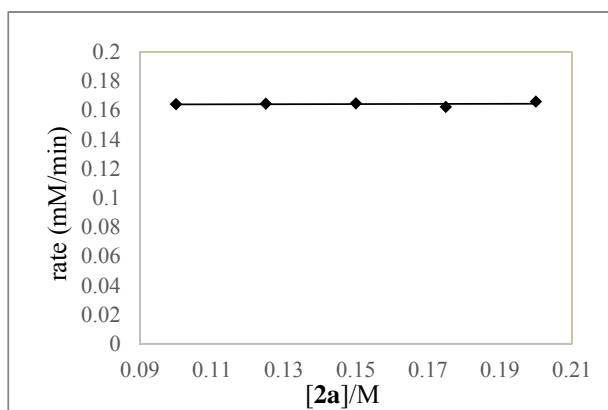

**Supplementary Figure 3.** Initial-rate dependence on [**2a**]. Conditions: [**2a**] = 0.10-0.20 M, [**5a**] = 0.05 M, [**3a**] = 0.075 M, [**N11**] = 0.025 M, [Pd(cod)Cl<sub>2</sub>] = 5.0 mM, [**L1**] = 5.0 mM, [5-CF<sub>3</sub>-pyridinone] = 0.01 M, Cs<sub>2</sub>CO<sub>3</sub> 0.15 mmol·mL<sup>-1</sup>.

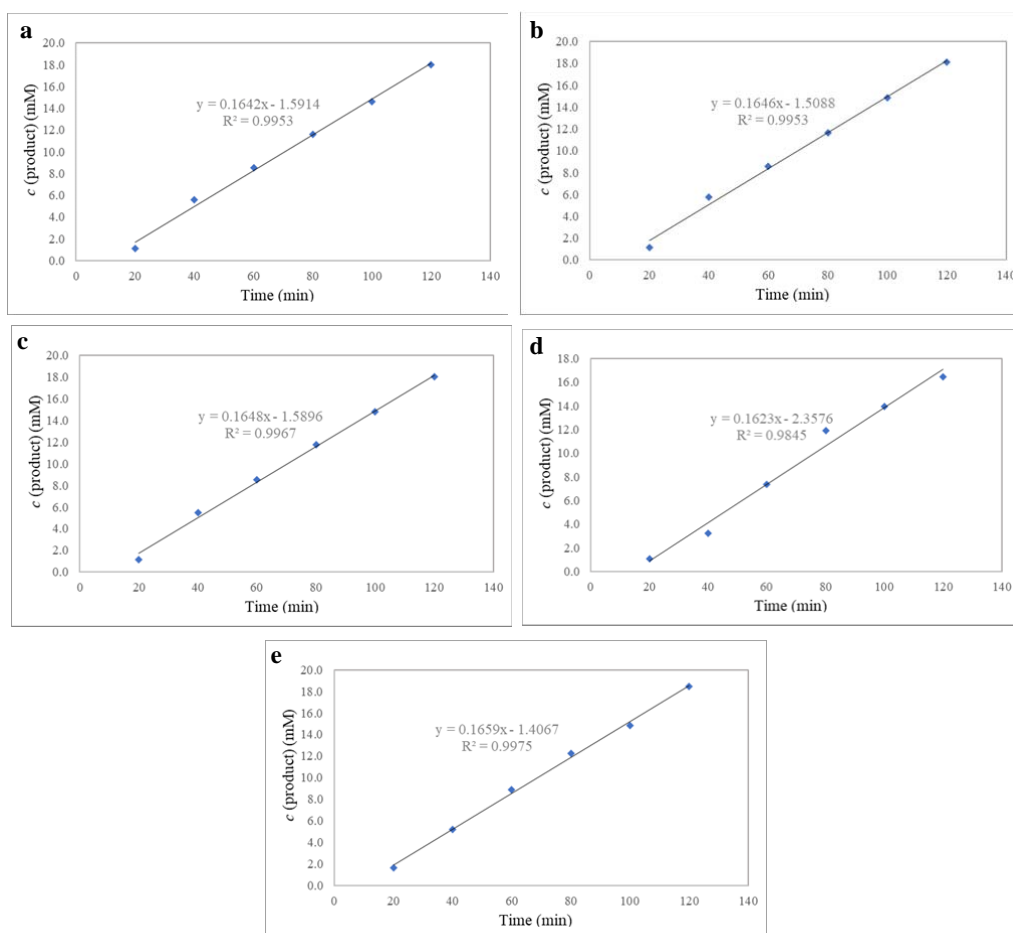

**Supplementary Figure 4.** Kinetic time courses for measuring initial-rate dependence on [5a].

a: [5a] = 0.10 M, b: [5a] = 0.125 M, c: [5a] = 0.15 M, d: [5a] = 0.175 M, e: [5a] = 0.20 M.

*Dependence of initial rate on 3a*

**Supplementary Table 3.** Initial-Rate Dependence on [3a]

|                                                        |        |        |        |        |        |
|--------------------------------------------------------|--------|--------|--------|--------|--------|
| Equivalency of <b>3a</b>                               | 1.0    | 1.25   | 1.5    | 1.75   | 2.0    |
| [ <b>3a</b> ]/M                                        | 0.05   | 0.0625 | 0.075  | 0.0875 | 0.10   |
| [ <b>2a</b> ]/M                                        | 0.15   | 0.15   | 0.15   | 0.15   | 0.15   |
| [ <b>5a</b> ]/M                                        | 0.05   | 0.05   | 0.05   | 0.05   | 0.05   |
| [ <b>N11</b> ]/M                                       | 0.025  | 0.025  | 0.025  | 0.025  | 0.025  |
| [Pd(cod)Cl <sub>2</sub> ]/mM                           | 5.0    | 5.0    | 5.0    | 5.0    | 5.0    |
| [ <b>L1</b> ]/mM                                       | 5.0    | 5.0    | 5.0    | 5.0    | 5.0    |
| [5-CF <sub>3</sub> -pyridinone]/M                      | 0.01   | 0.01   | 0.01   | 0.01   | 0.01   |
| Cs <sub>2</sub> CO <sub>3</sub> /mmol·mL <sup>-1</sup> | 0.15   | 0.15   | 0.15   | 0.15   | 0.15   |
| initial rate/mM·min <sup>-1</sup>                      | 0.1521 | 0.1578 | 0.1648 | 0.1638 | 0.1703 |



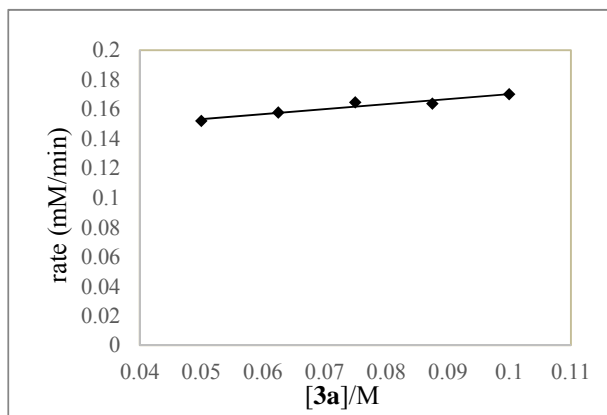

**Supplementary Figure 5.** Initial-rate dependence on [3a]. Conditions: [3a] = 0.05-0.10 M, [2a] = 0.15 M, [5a] = 0.05 M, [N11] = 0.025 M, [Pd(cod)Cl<sub>2</sub>] = 5.0 mM, [L1] = 5.0 mM, [5-CF<sub>3</sub>-pyridinone] = 0.01 M, Cs<sub>2</sub>CO<sub>3</sub> 0.15 mmol·mL<sup>-1</sup>.

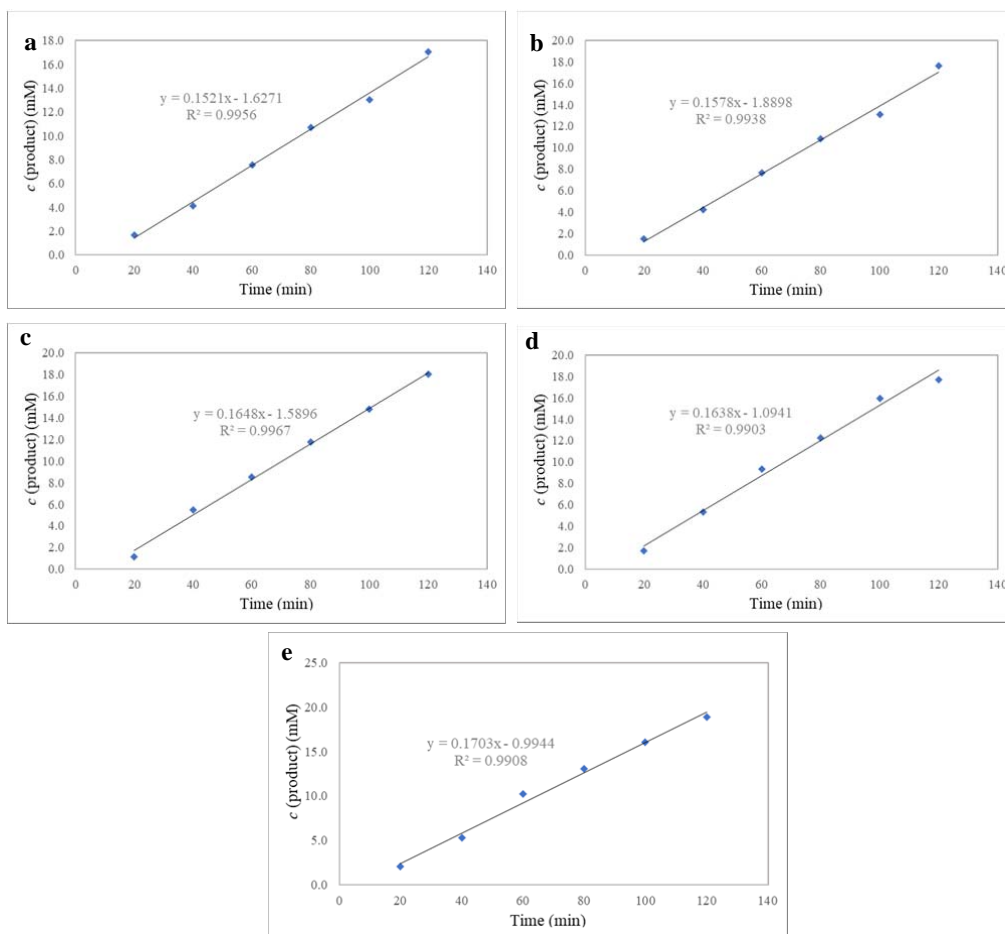

**Supplementary Figure 6.** Kinetic time courses for measuring initial-rate dependence on [3a].  
**a:** [3a] = 0.05 M, **b:** [3a] = 0.0625 M, **c:** [3a] = 0.075 M, **d:** [3a] = 0.0875 M, **e:** [3a] = 0.10 M.

Dependence of initial rate on *NII*

**Supplementary Table 4.** Initial-Rate Dependence on [N11]

|                                                        |        |        |        |        |        |        |
|--------------------------------------------------------|--------|--------|--------|--------|--------|--------|
| Equivalency of N11                                     | 0.15   | 0.20   | 0.25   | 0.5    | 0.75   | 1.00   |
| [N11]/M                                                | 0.0075 | 0.01   | 0.0125 | 0.025  | 0.0375 | 0.05   |
| [2a]/M                                                 | 0.15   | 0.15   | 0.15   | 0.15   | 0.15   | 0.15   |
| [3a]/M                                                 | 0.075  | 0.075  | 0.075  | 0.075  | 0.075  | 0.075  |
| [5a]/M                                                 | 0.05   | 0.05   | 0.05   | 0.05   | 0.05   | 0.05   |
| [Pd(cod)Cl <sub>2</sub> ]/mM                           | 5.0    | 5.0    | 5.0    | 5.0    | 5.0    | 5.0    |
| [L1]/mM                                                | 5.0    | 5.0    | 5.0    | 5.0    | 5.0    | 5.0    |
| [5-CF <sub>3</sub> -pyridinone]/M                      | 0.01   | 0.01   | 0.01   | 0.01   | 0.01   | 0.01   |
| Cs <sub>2</sub> CO <sub>3</sub> /mmol·mL <sup>-1</sup> | 0.15   | 0.15   | 0.15   | 0.15   | 0.15   | 0.15   |
| initial rate/mM·min <sup>-1</sup>                      | 0.1591 | 0.1652 | 0.1535 | 0.1648 | 0.1625 | 0.1612 |

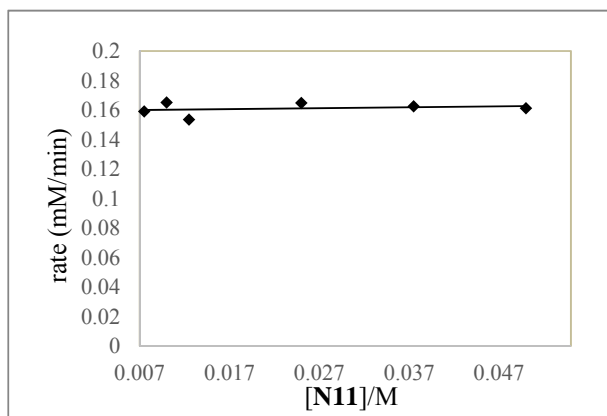

**Supplementary Figure 7.** Initial-rate dependence on [N11]. Conditions: [N11] = 0.0075-0.05 M, [2a] = 0.15 M, [3a] = 0.075 M, [5a] = 0.05 M, [Pd(cod)Cl<sub>2</sub>] = 5.0 mM, [L1] = 5.0 mM, [5-CF<sub>3</sub>-pyridinone] = 0.01 M, Cs<sub>2</sub>CO<sub>3</sub> 0.15 mmol·mL<sup>-1</sup>.

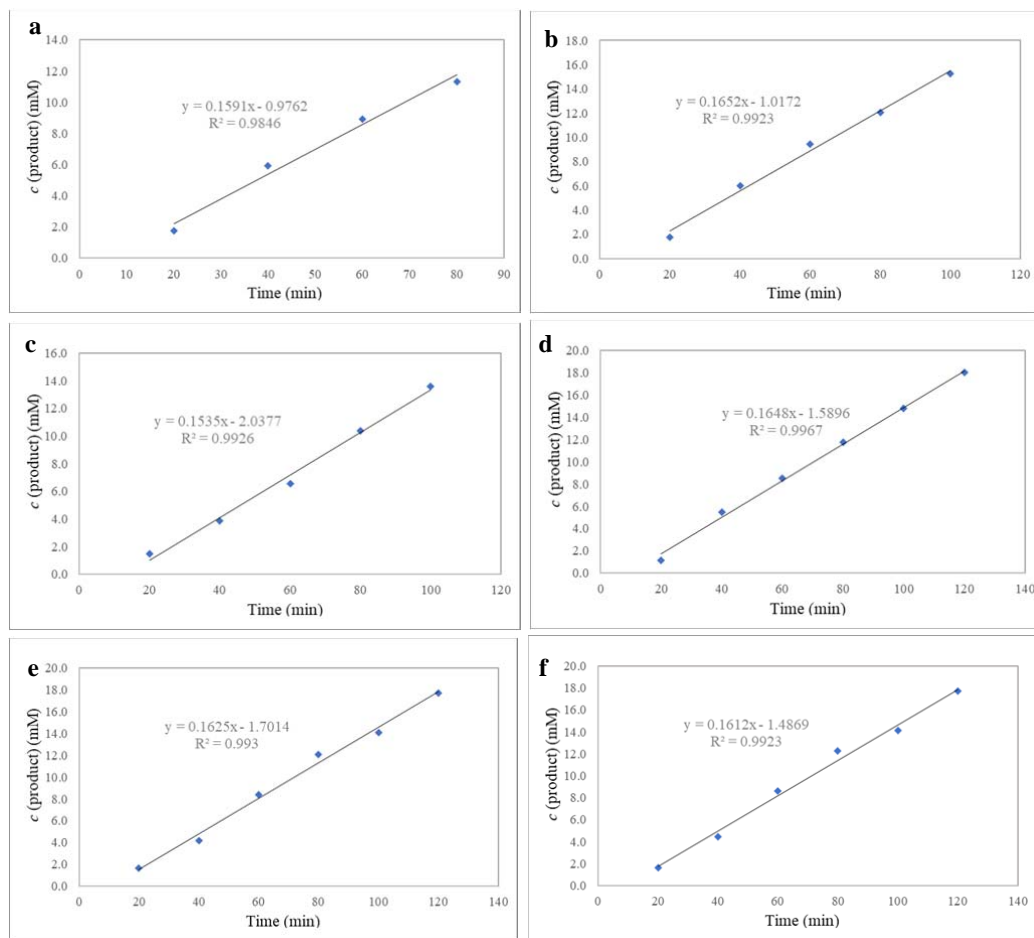

**Supplementary Figure 8.** Kinetic time courses for measuring initial-rate dependence on [N11].

**a:** [N11] = 0.0075 M, **b:** [N11] = 0.01 M, **c:** [N11] = 0.0125 M, **d:** [N11] = 0.025 M, **e:** [N11] = 0.0375 M, **f:** [N11] = 0.05 M

*Dependence of initial rate on Pd/L1*

**Supplementary Table 5.** Initial-Rate Dependence on [Pd/L1]

|                                                        |        |        |        |        |
|--------------------------------------------------------|--------|--------|--------|--------|
| Equivalency of Pd/L1                                   | 0.05   | 0.075  | 0.10   | 0.125  |
| [Pd(cod)Cl <sub>2</sub> ]/mM                           | 2.5    | 3.75   | 5.0    | 6.25   |
| [L1]/mM                                                | 2.5    | 3.75   | 5.0    | 6.25   |
| [2a]/M                                                 | 0.15   | 0.15   | 0.15   | 0.15   |
| [3a]/M                                                 | 0.075  | 0.075  | 0.075  | 0.075  |
| [5a]/M                                                 | 0.05   | 0.05   | 0.05   | 0.05   |
| [N11]/M                                                | 0.025  | 0.025  | 0.025  | 0.025  |
| [5-CF <sub>3</sub> -pyridinone]/M                      | 0.01   | 0.01   | 0.01   | 0.01   |
| Cs <sub>2</sub> CO <sub>3</sub> /mmol·mL <sup>-1</sup> | 0.15   | 0.15   | 0.15   | 0.15   |
| initial rate/mM·min <sup>-1</sup>                      | 0.0712 | 0.1140 | 0.1648 | 0.1782 |

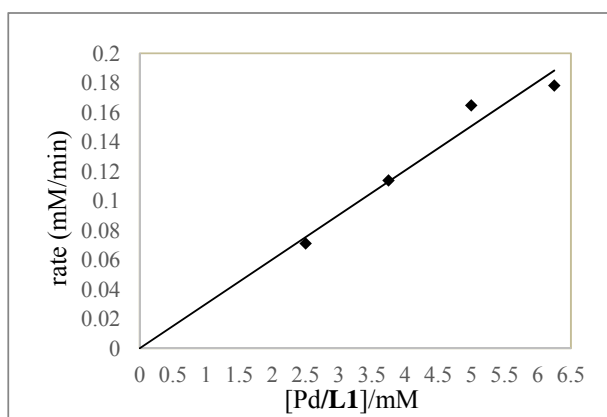

**Supplementary Figure 9.** Initial-rate dependence on [Pd/L1]. Conditions: [Pd/L1] = 2.5-6.25 mM, [2a] = 0.5 M, [3a] = 0.075 M, [5a] = 0.05 M, [5-CF<sub>3</sub>-pyridinone] = 0.01 M, [2a] = 0.15 M, Cs<sub>2</sub>CO<sub>3</sub> 0.15 mmol·mL<sup>-1</sup>.

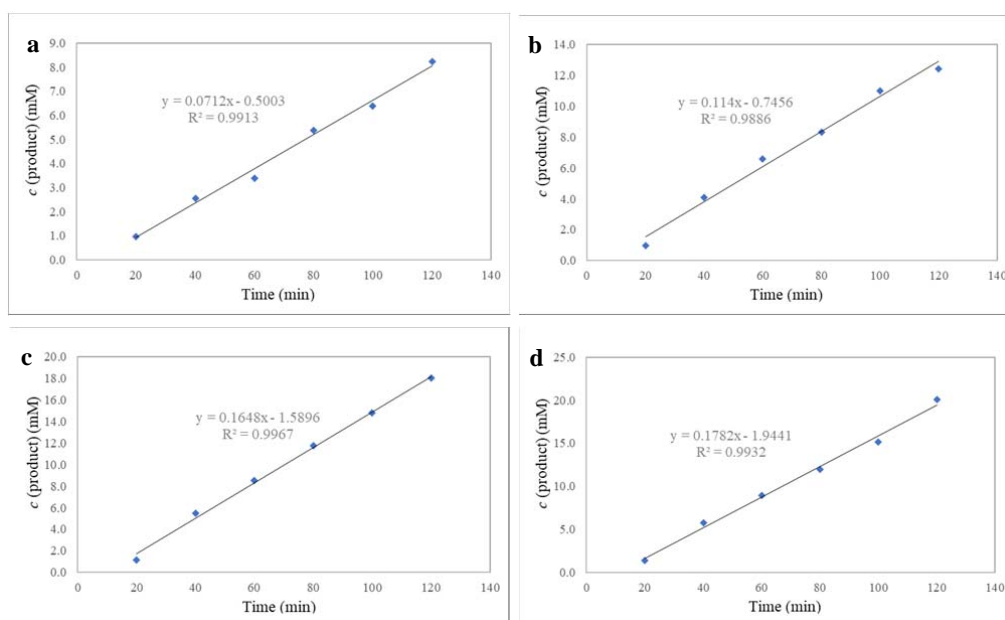

**Supplementary Figure 10.** Kinetic time courses for measuring initial-rate dependence on [Pd/L1]. **a:** [Pd/L1] = 2.5 mM, **b:** [Pd/L1] = 3.75 mM, **c:** [Pd/L1] = 5.0 mM, **d:** [Pd/L1] = 6.25 mM.

Dependence of initial rate for side-product **4a''** on **N11**

**Supplementary Table 6.** Initial-Rate Dependence for Side-product **4a''** on **[N11]**

|                                                        |        |        |        |
|--------------------------------------------------------|--------|--------|--------|
| Equivalency of <b>N11</b>                              | 0.15   | 0.20   | 0.25   |
| <b>[N11]</b> /M                                        | 0.0075 | 0.01   | 0.0125 |
| Effective <b>[N11]</b> /M                              | 0.0025 | 0.0050 | 0.0075 |
| <b>[2a]</b> /M                                         | 0.15   | 0.15   | 0.15   |
| <b>[3a]</b> /M                                         | 0.075  | 0.075  | 0.075  |
| <b>[5a]</b> /M                                         | 0.05   | 0.05   | 0.05   |
| [Pd(cod)Cl <sub>2</sub> ]/mM                           | 5.0    | 5.0    | 5.0    |
| <b>[L1]</b> /mM                                        | 5.0    | 5.0    | 5.0    |
| [5-CF <sub>3</sub> -pyridinone]/M                      | 0.01   | 0.01   | 0.01   |
| Cs <sub>2</sub> CO <sub>3</sub> /mmol·mL <sup>-1</sup> | 0.15   | 0.15   | 0.15   |
| initial rate/mM·min <sup>-1</sup>                      | 0.2365 | 0.1154 | 0.0601 |

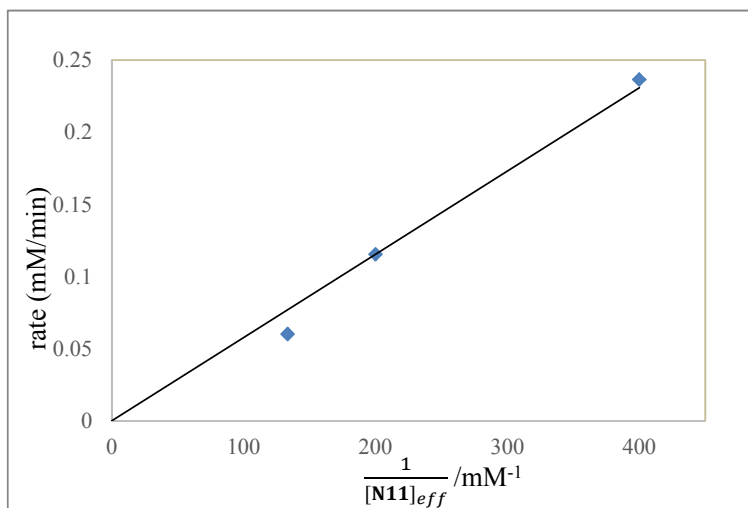

**Supplementary Figure 11.** Initial-rate dependence on **[N11]**. Conditions: **[N11]** = 0.0075-0.0125 M, **[2a]** = 0.15 M, **[3a]** = 0.075 M, **[5a]** = 0.05 M, [Pd(cod)Cl<sub>2</sub>] = 5.0 mM, **[L1]** = 5.0 mM, [5-CF<sub>3</sub>-pyridinone] = 0.01 M, Cs<sub>2</sub>CO<sub>3</sub> 0.15 mmol·mL<sup>-1</sup>.

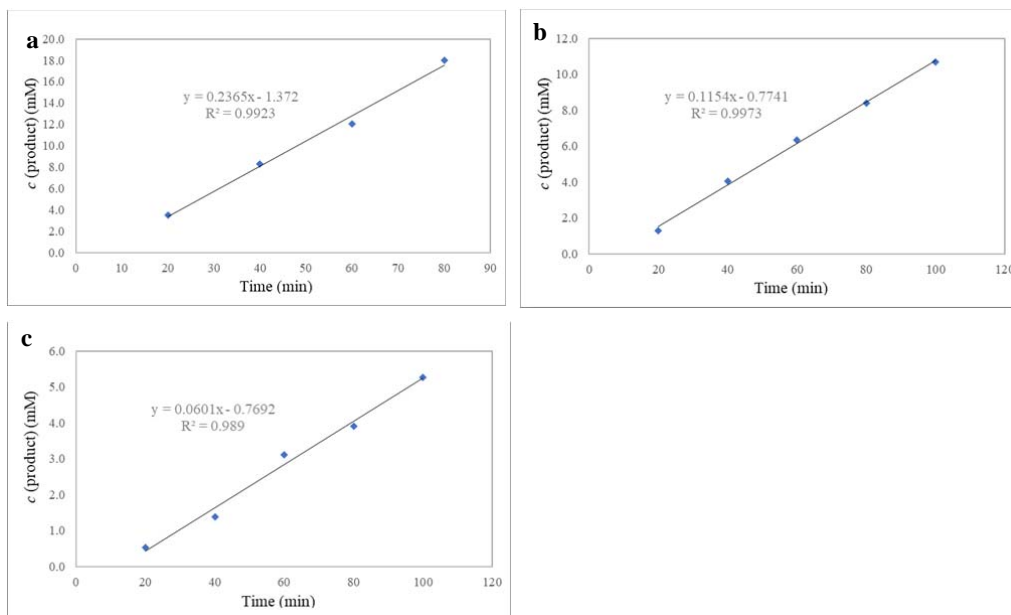

**Supplementary Figure 12.** Kinetic time courses for measuring initial-rate dependence on [N11]. **a:** [N11] = 0.0075 M, **b:** [N11] = 0.01 M, **c:** [N11] = 0.0125 M.

**Supplementary Table 7.** Yield Dependence for **4a** and **4a''** on [N11]

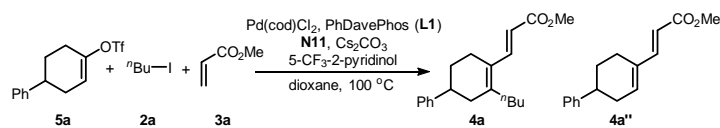

| [N11]    | Yield ( <b>4a</b> ) | Yield ( <b>4a''</b> ) |
|----------|---------------------|-----------------------|
| 100 mol% | 77                  | n.d.                  |
| 50 mol%  | 76                  | 4                     |
| 25 mol%  | 53                  | 14                    |
| 20 mol%  | 40                  | 20                    |
| 15 mol%  | 28                  | 36                    |

### Derivation of the rate law:

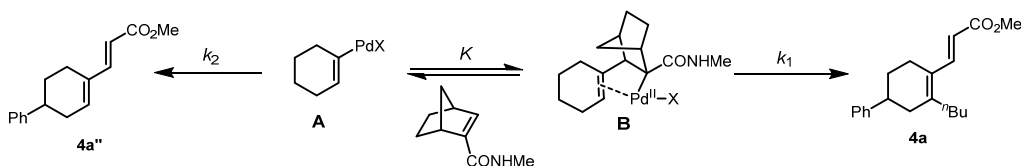

### Supplementary Figure 13. Simplified scheme for the formation of **4a** and **4a''**

The rate for the formation of product **4a** has a zero-order dependence of  $[\mathbf{N11}]$ ; while the rate for the formation of side-product **4a''** has a negative first-order dependence of  $[\mathbf{N11}]_{\text{eff}}$ . These kinetic data are most consistent with the scenario that norbornene insertion/de-insertion is a pre-equilibrium before the turnover-limiting steps ( $k_1$  and  $k_2$ ).

If we assume  $[A] + [B] = [\text{Pd}]$ , which should be proportional to the total amount of palladium pre-catalyst added in the reaction mixture, then:

$$\frac{d[\mathbf{4a}]}{dt} = k_1 \frac{K[\mathbf{N11}]}{1 + K[\mathbf{N11}]} [\text{Pd}]$$
$$\frac{d[\mathbf{4a''}]}{dt} = k_2 \frac{1}{1 + K[\mathbf{N11}]} [\text{Pd}]$$

If  $K$  is very large, then:

$$\frac{d[\mathbf{4a}]}{dt} = k_1 [\text{Pd}]$$
$$\frac{d[\mathbf{4a''}]}{dt} = k_2 \frac{1}{K[\mathbf{N11}]} [\text{Pd}]$$

Therefore, these kinetic data suggest that the equilibrium for norbornene **N11** insertion favors B over A. Although in theory only a catalytic amount (10 mol%) of **N11** was required, 50 mol% of **N11** is needed in this reaction in order to suppress Heck side product **4a''** by shifting the pre-equilibrium towards B.

Measurement of the kinetic isotopic effect (KIE):

**Parallel kinetic isotope effect:** following the general method, parallel kinetic isotope effect (KIE) in the C–H metallation process was measured by two sets of parallel experiments employing **5a** and **5a-d<sub>3</sub>**, respectively. The KIE was obtained by the ratio of reaction rates ( $k_H/k_D$ ):

$$KIE = \frac{k_H}{k_D} = \frac{0.1648}{0.1129} = 1.5$$

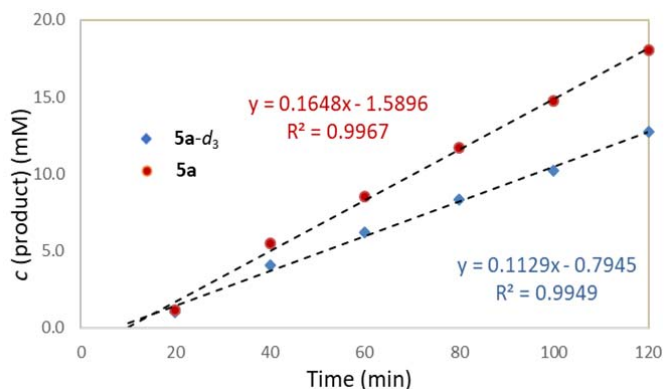

**Supplementary Figure 14.** Kinetic time courses for measuring the parallel KIE.

**Competition kinetic isotope effect:** following the general procedure, the reaction was run with a mixture of **5a** (50 mol%) and **5a-d<sub>3</sub>** (50 mol%) as the reactants. The reaction was stopped at 1h and 2h, respectively. After isolation of the products by column chromatography, the competition KIE was obtained by the ratio of yields of products **4a** and **4a-d<sub>2</sub>** ( $P_H/P_D$ ):

**Supplementary Table 8.** Competition KIE values obtained from different reaction times

| Reaction time | Ratio of <b>4a</b> : <b>4a-d<sub>2</sub></b> | KIE |
|---------------|----------------------------------------------|-----|
| 1 h           | 61.5% : 38.5%                                | 1.6 |
| 2 h           | 60.5% : 39.5%                                | 1.5 |



## Discussion:

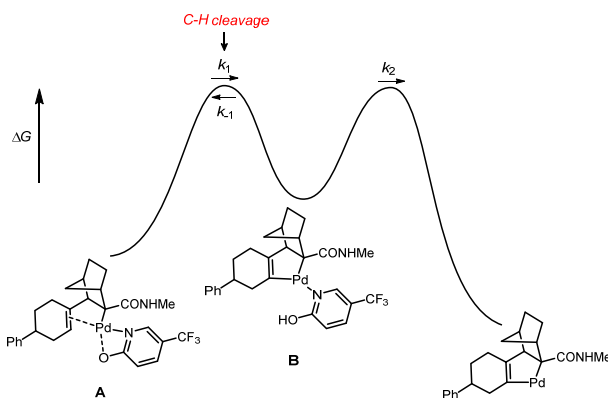

**Supplementary Figure 15.** Hypothetical reaction profile.

According to the literature,<sup>21</sup> a parallel KIE of 1.5 and competition KIE of 1.6 are most consistent with the reaction profile in Supplementary Figure 15.

Consider the rate law for the reaction profile above:

$$\frac{d[P]}{dt} = k_2[B] = \frac{k_1 k_2 [A]}{k_{-1} + k_2} \quad (\text{eq 1})$$

(1) If  $k_{-1} \ll k_2$ , then (eq 1) could be reduced to:

$$\frac{d[P]}{dt} = k_1[A]$$

a **large primary** KIE ( $>3$ ) would be expected.

(2) If  $k_{-1} \gg k_2$ , then (eq 1) could be reduced to:

$$\frac{d[P]}{dt} = \frac{k_1 k_2}{k_{-1}} [A]$$

an equilibrium isotope effect (in this case, close to 1 or less than 1) would be expected.

(3) If  $k_{-1} \approx k_2$ , C–H cleavage is only partially turnover-limiting and that another elementary step either before or after C–H cleavage (*e.g.* ligand dissociation/exchange) also contributes to the catalytic turnover rate. We are expecting to get a **small primary** KIE in this case. This scenario is most consistent with our experimental results.

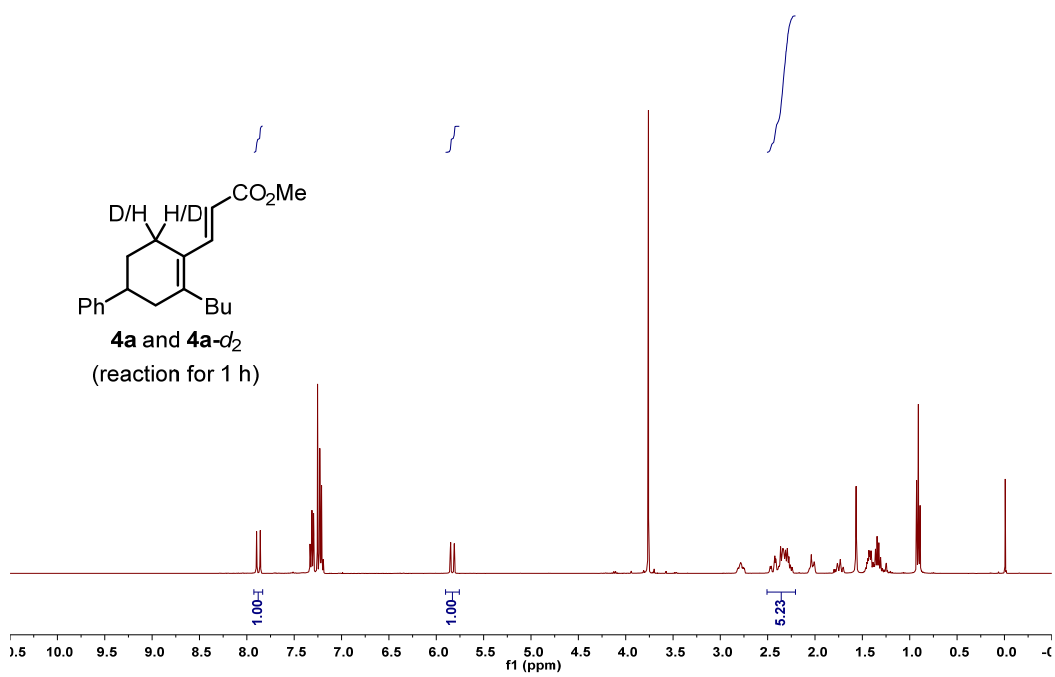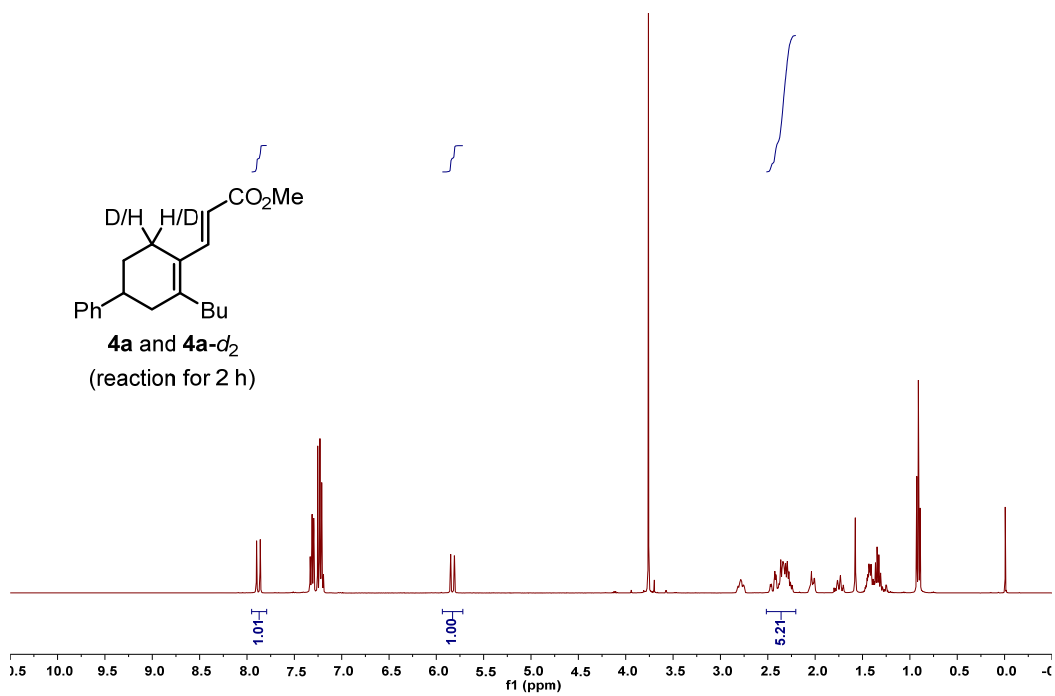

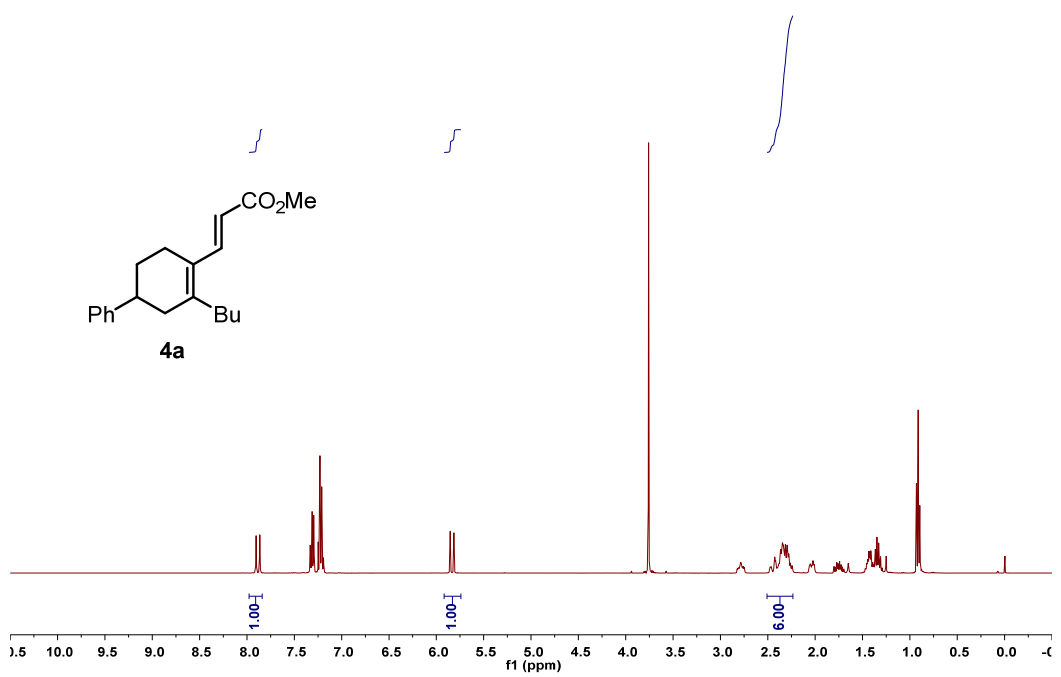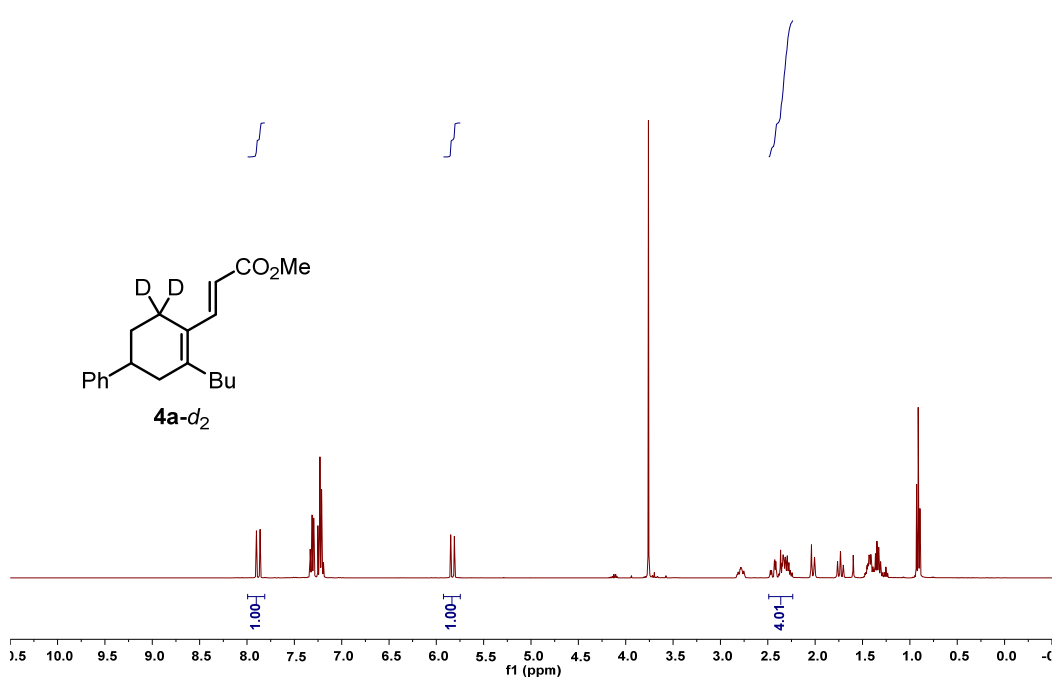

Preparation of **5a-d<sub>3</sub>**:

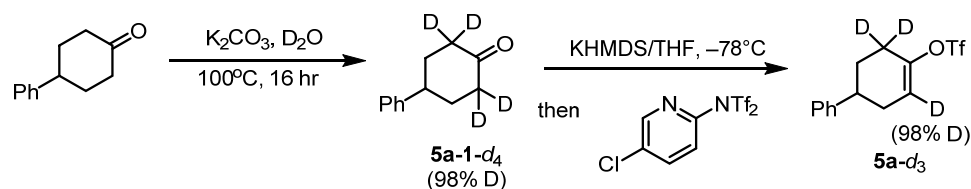

A suspension containing 4-phenylcyclohexan-1-one (3.48 g, 20 mmol, 1.0 equiv.) and potassium carbonate (5.52 g, 40 mmol, 2.0 equiv.) in 35 mL of deuterium oxide and 5 mL of acetone- $d_6$  was heated at reflux for 16 h. After cooling, the reaction mixture was extracted with ether, and the combined organic phase was concentrated under reduced pressure. H/D exchange was repeated to afford **5a-1-d<sub>4</sub>**, which was directly used in the next step without further purification.

To the solution of KHMDS (955 mg, 4.8 mmol, 1.2 equiv.) in anhydrous THF (5 mL) was slowly added a solution of **5a-1-d<sub>4</sub>** (712 mg, 4.0 mmol, 1.0 equiv.) in anhydrous THF (10 mL) at  $-78^\circ C$ . After 1 h at  $-78^\circ C$  under a nitrogen atmosphere, a solution of Comin's reagent (1.89 g, 4.8 mmol, 1.2 equiv.) in anhydrous THF (10 mL) was slowly added to the reaction mixture at  $-78^\circ C$ . The solution mixture was allowed to warm to room temperature over 1 h and stirred for additional 3 h. The resulting solution was treated with saturated aqueous  $NaHCO_3$  (20 mL) and extracted with  $Et_2O$  ( $3 \times 20$  mL). The combined organic extracts were washed with brine (20 mL), dried over anhydrous  $MgSO_4$ , and filtered. The solvent was removed in vacuo. The resulting crude product was purified by column chromatography.

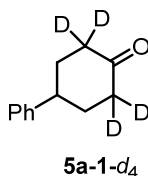

**5a-1-d<sub>4</sub>**: White solid. Melting point =  $75-76^\circ C$ . (20 mmol scale, 3.14 g, 90% yield, 98% D).  $R_f = 0.80$  (hexane/ethyl acetate = 20:1). **<sup>1</sup>H NMR** (400 MHz, Chloroform- $d$ )  $\delta$  7.36 – 7.30 (m, 2H), 7.27 – 7.20 (m, 3H), 3.03 (tt,  $J = 12.1, 3.5$  Hz, 1H), 2.27 – 2.16 (m, 2H), 1.94 (t,  $J = 12.8$  Hz, 2H). **<sup>13</sup>C NMR** (101 MHz, Chloroform- $d$ )  $\delta$  144.80, 128.62, 126.69, 126.59, 42.74, 33.89. **IR** (KBr,  $cm^{-1}$ ):  $\nu$  2937, 2867, 2360, 1694, 1451, 1239, 1145. **HRMS** (ESI): Calcd for  $C_{12}H_{11}D_4O^+$  ( $M+H^+$ ): 179.1368, found: 179.1364.

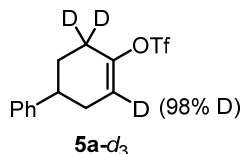

**5a-d<sub>3</sub>**: Colorless oil. (4.0 mmol scale, 0.59 g, 48% yield, 98% D).  $R_f = 0.65$  (hexane/ethyl acetate = 20:1). **<sup>1</sup>H NMR** (400 MHz, Chloroform-*d*)  $\delta$  7.33 (tt,  $J = 7.1, 1.0$  Hz, 2H), 7.26 – 7.20 (m, 3H), 2.85 (dddd,  $J = 11.5, 10.0, 5.3, 3.1$  Hz, 1H), 2.47 (ddd,  $J = 17.7, 5.3, 1.6$  Hz, 1H), 2.33 (dd,  $J = 17.7, 10.1$  Hz, 1H), 2.07 (ddd,  $J = 12.9, 3.0, 1.5$  Hz, 1H), 1.95 (t,  $J = 12.4$  Hz, 1H). **<sup>13</sup>C NMR** (101 MHz, Chloroform-*d*)  $\delta$  144.57, 128.64, 126.75, 126.66, 38.69, 31.46, 29.49. **IR** (KBr,  $\text{cm}^{-1}$ ):  $\nu$  3030, 2926, 1674, 1454, 1417, 1210, 1143, 1013. **HRMS** (ESI): Calcd for  $\text{C}_{13}\text{H}_{11}\text{D}_3\text{F}_3\text{O}_3\text{S}^+$  ( $\text{M}+\text{H}^+$ ): 310.0799, found: 310.0792.

Characterization data of **4a-d<sub>2</sub>**:

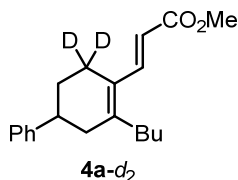

**4a-d<sub>2</sub>**: Light yellow oil.  $R_f = 0.35$  (hexane/ethyl acetate = 10:1).  $R_f = 0.35$  (hexane/ethyl acetate = 10:1). **<sup>1</sup>H NMR** (400 MHz, Chloroform-*d*)  $\delta$  7.89 (d,  $J = 15.6$  Hz, 1H), 7.37 – 7.29 (m, 2H), 7.25 – 7.19 (m, 3H), 5.84 (d,  $J = 15.6$  Hz, 1H), 3.77 (s, 3H), 2.85 – 2.73 (m, 1H), 2.51 – 2.23 (m, 4H), 2.03 (d,  $J = 12.8$  Hz, 1H), 1.74 (t,  $J = 12.4$  Hz, 1H), 1.51 – 1.25 (m, 4H), 0.92 (t,  $J = 7.2$  Hz, 3H). **<sup>13</sup>C NMR** (101 MHz, Chloroform-*d*)  $\delta$  168.49, 147.76, 146.28, 142.38, 128.49, 126.79, 126.72, 126.26, 114.82, 51.46, 39.99, 39.77, 33.37, 31.50, 29.22, 22.81, 13.99. **IR** (KBr,  $\text{cm}^{-1}$ ):  $\nu$  2954, 2929, 2871, 1718, 1618, 1434, 1299, 1172. **HRMS** (ESI): Calcd for  $\text{C}_{20}\text{H}_{25}\text{D}_2\text{O}_2^+$  ( $\text{M}+\text{H}^+$ ): 301.2131, found: 301.2140.

### Identification of the actual ligand:

The isolation of cyclic phosphine oxide **10** and by-product **11** led us to propose a reaction mechanism of how the active catalyst was generated.<sup>22</sup> The reaction is initiated by the C–H palladation of **L2** with PdX<sub>2</sub> to form the cyclopalladated complex **A**. Subsequent reductive elimination from **A** leads to the formation of phosphonium **B** along with Pd(0). The phosphonium **B** can then undergo oxidative addition with Pd(0), which provides complex **C** through cleavage of the C–P bond. The resulting phenyl Pd(II) species could undergo migratory insertion into **N11**, and further a normal Catellani reaction takes place to give the actual catalyst **E** along with **11** as the by-product.

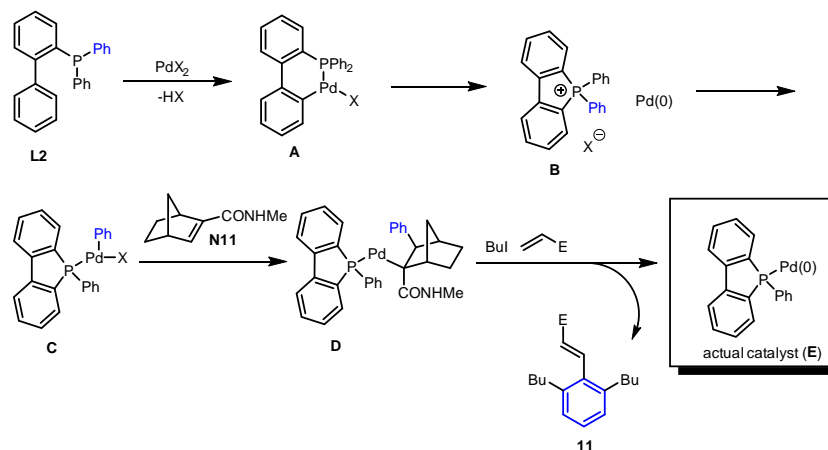

**Supplementary Figure 16.** Proposed mechanism for the formation of the active catalyst.

To confirm that **L7** was the actual active ligand, the parallel kinetic study of reactions using **L2** or **L7** as the ligand was conducted, following the general method. A sacrificial additional 10 mol% of **L7** was used to reduce Pd(II) into Pd(0), which was not required in the case of **L2**.

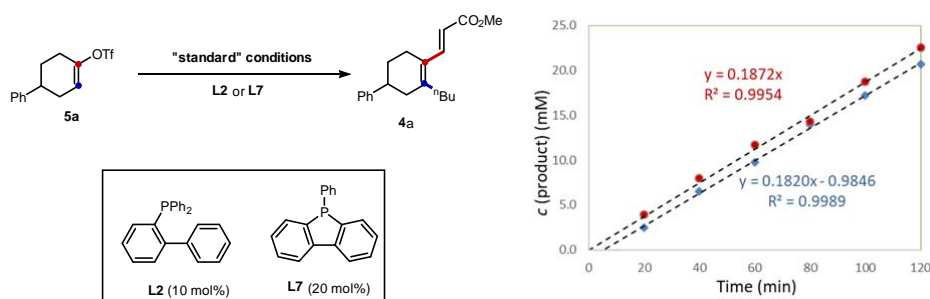

**Supplementary Figure 17.** Kinetic time courses for reactions using **L2** and **L7**.

**Supplementary Table 9.** Performance of **L2**, **L7** and **L6** (PPh<sub>3</sub>) in the standard conditions

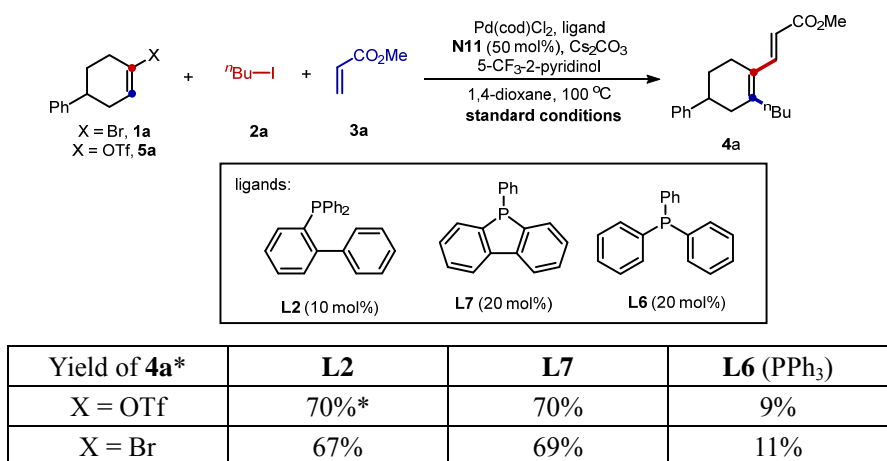

\* Yields were determined by <sup>1</sup>H NMR using 1,1,2,2-tetrachloroethane as the internal standard.

**Supplementary Table 10.** Ligand effect

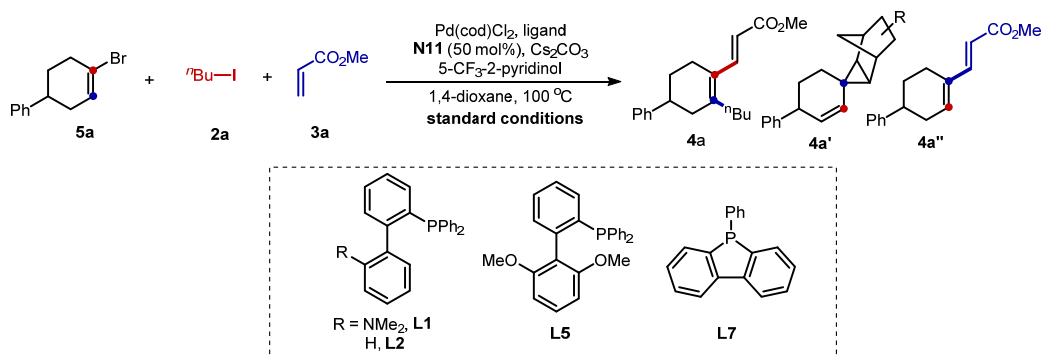

|                                         | Yield of <b>4a</b> * | Yield of <b>4a'</b> ** | Yield of <b>4a''</b> ** |
|-----------------------------------------|----------------------|------------------------|-------------------------|
| <b>L1</b> (10 mol%)                     | 74%                  | <5%                    | 6%                      |
| <b>L2</b> (10 mol%)                     | 67%                  | <5%                    | 6%                      |
| <b>L7</b> (20 mol%)                     | 69%                  | <5%                    | 6%                      |
| <b>L5</b> (10 mol%)                     | 12%                  | 6%                     | 10%                     |
| PPh <sub>3</sub> (20 mol%) <sup>a</sup> | 11%                  | <5%                    | 5%                      |
| dppe (10 mol%)                          | 14%                  | 6%                     | 6%                      |
| P(2-furyl) <sub>3</sub> (20 mol%)       | 3%                   | 9%                     | 5%                      |
| CyJohnPhos (10 mol%)                    | 3%                   | 18%                    | 20%                     |
| DPEPhos (10 mol%)                       | 10%                  | 9%                     | 6%                      |
| PCy <sub>3</sub> (20 mol%) <sup>b</sup> | <5%                  | 9%                     | 7%                      |
| PPh <sub>2</sub> Me (20 mol%)           | 20%                  | 21%                    | 6%                      |

\* Yields were determined by <sup>1</sup>H NMR using 1,1,2,2-tetrachloroethane as the internal standard. <sup>a</sup> 19% of **5a** was decomposed to corresponding diene. <sup>b</sup> Conversion is 60%.

# IV. Spectra

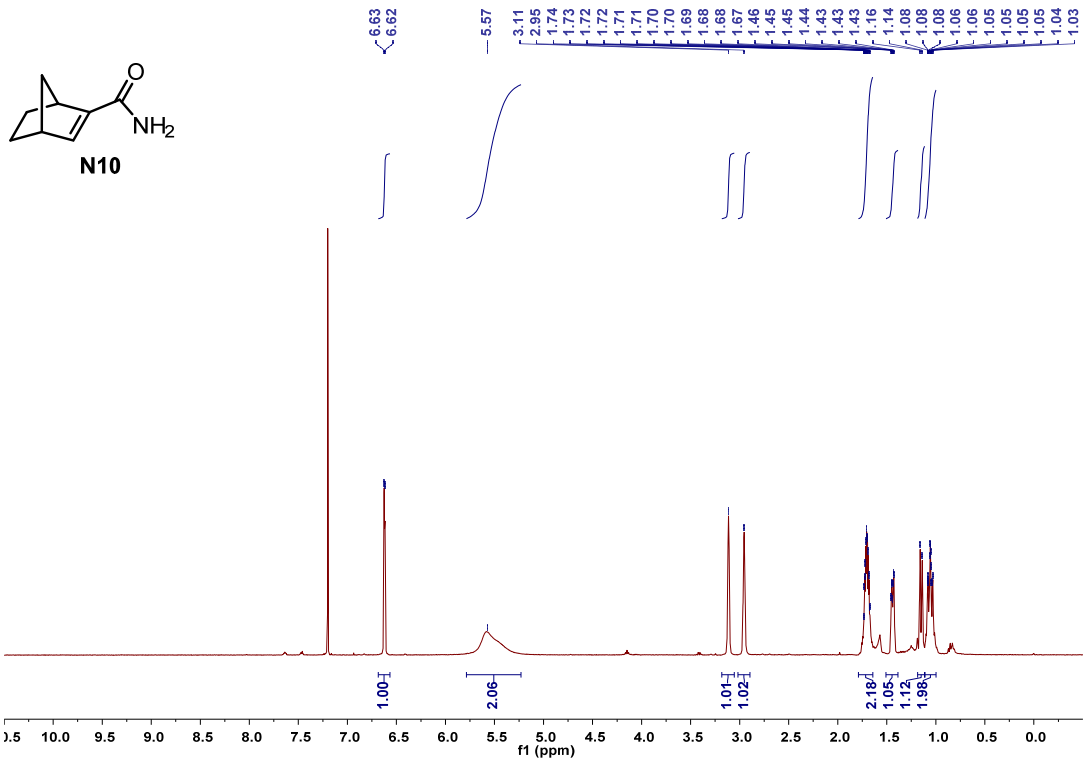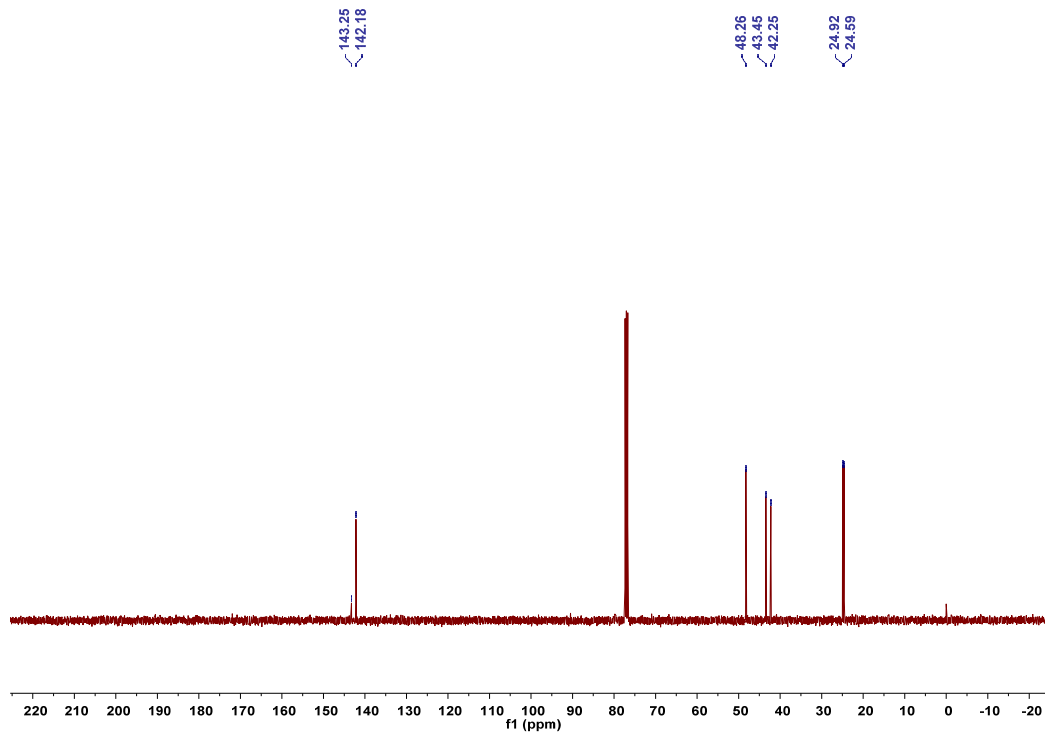



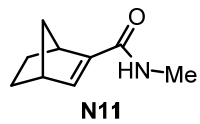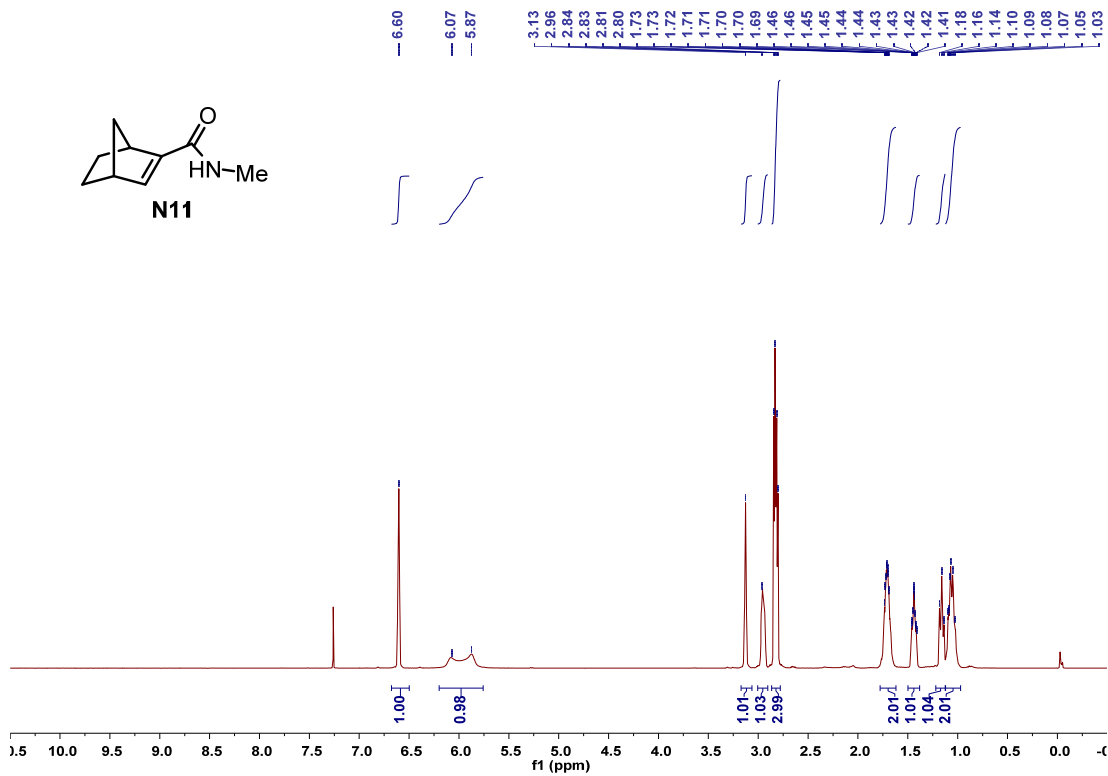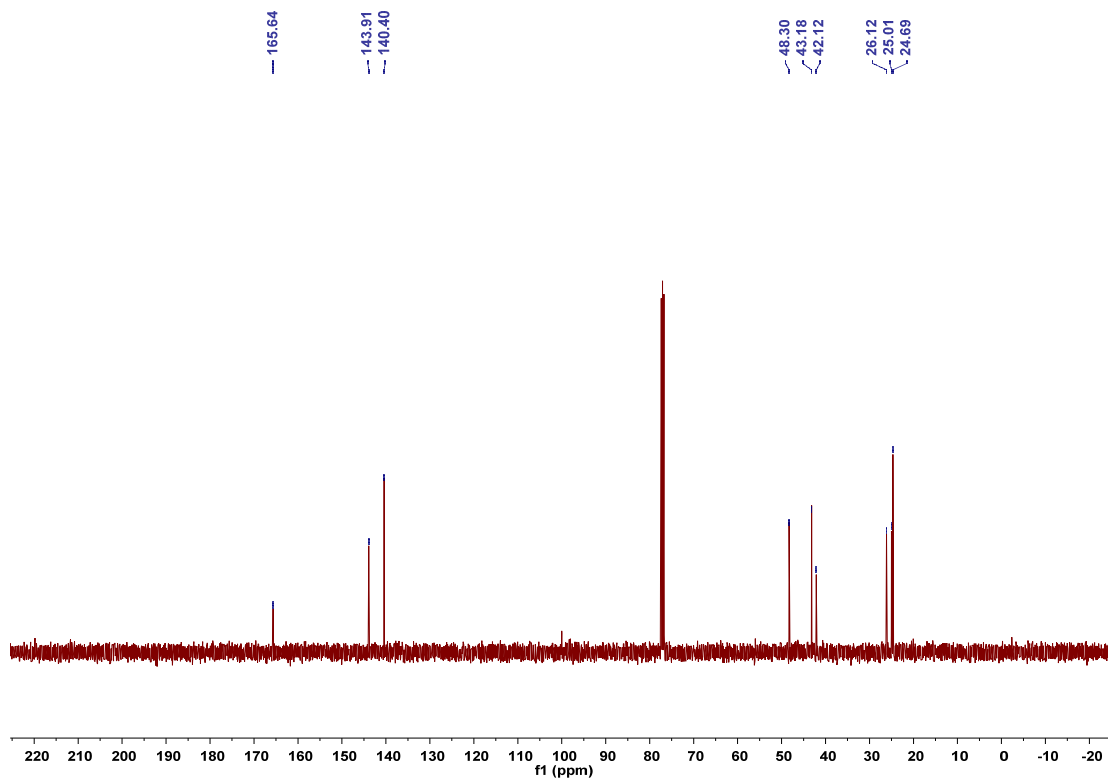

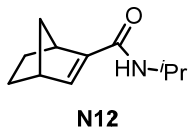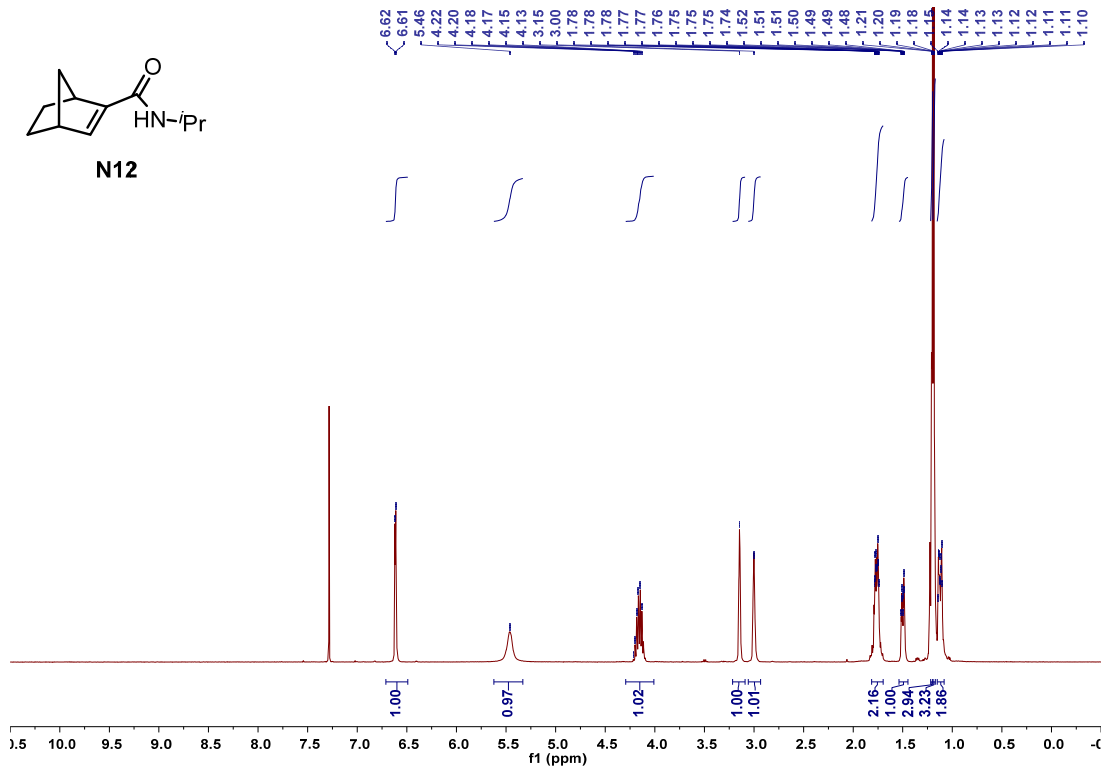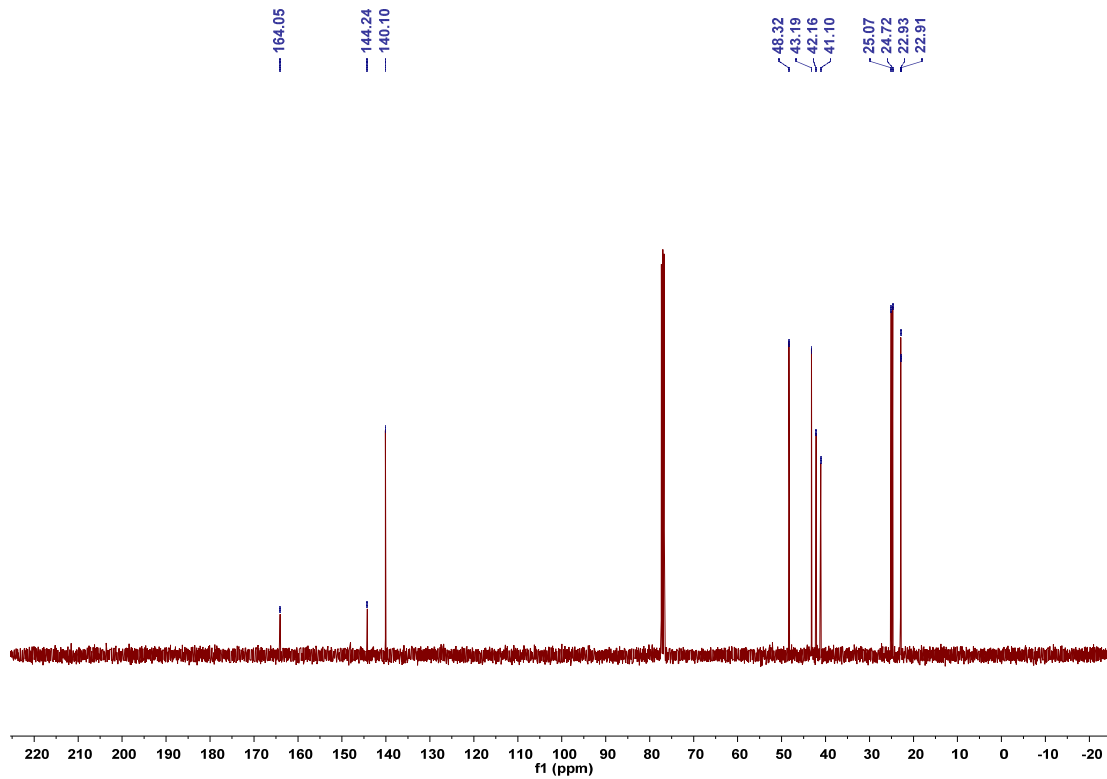

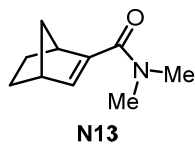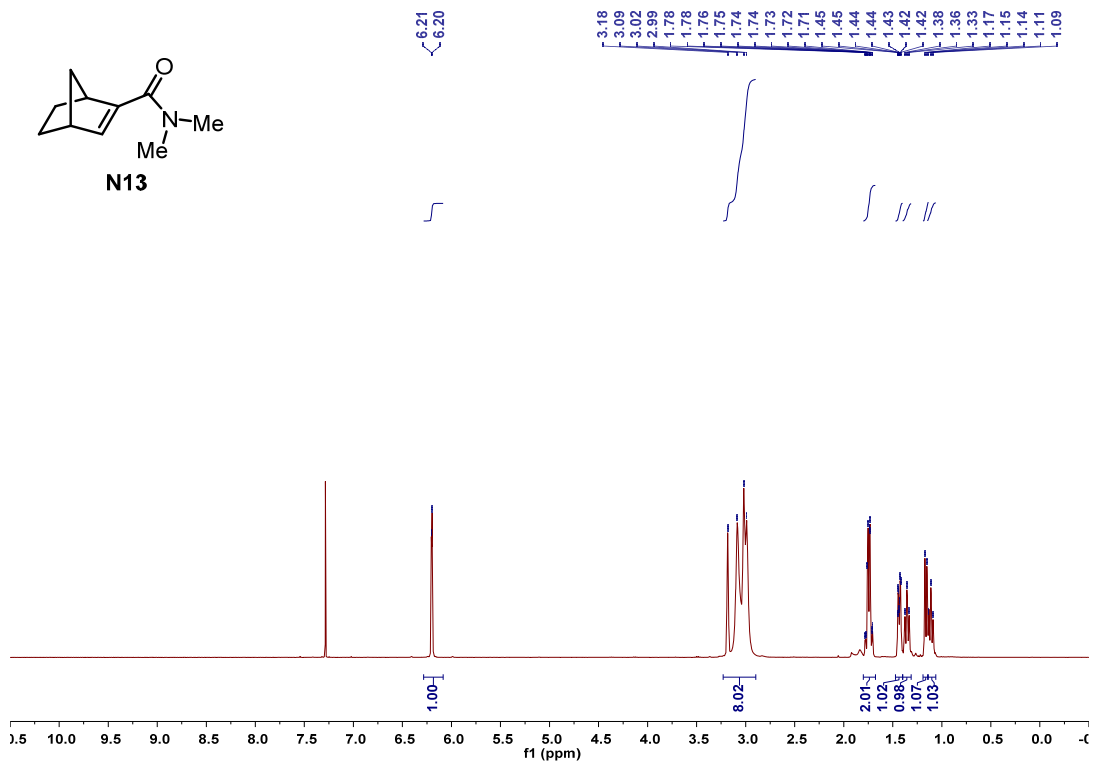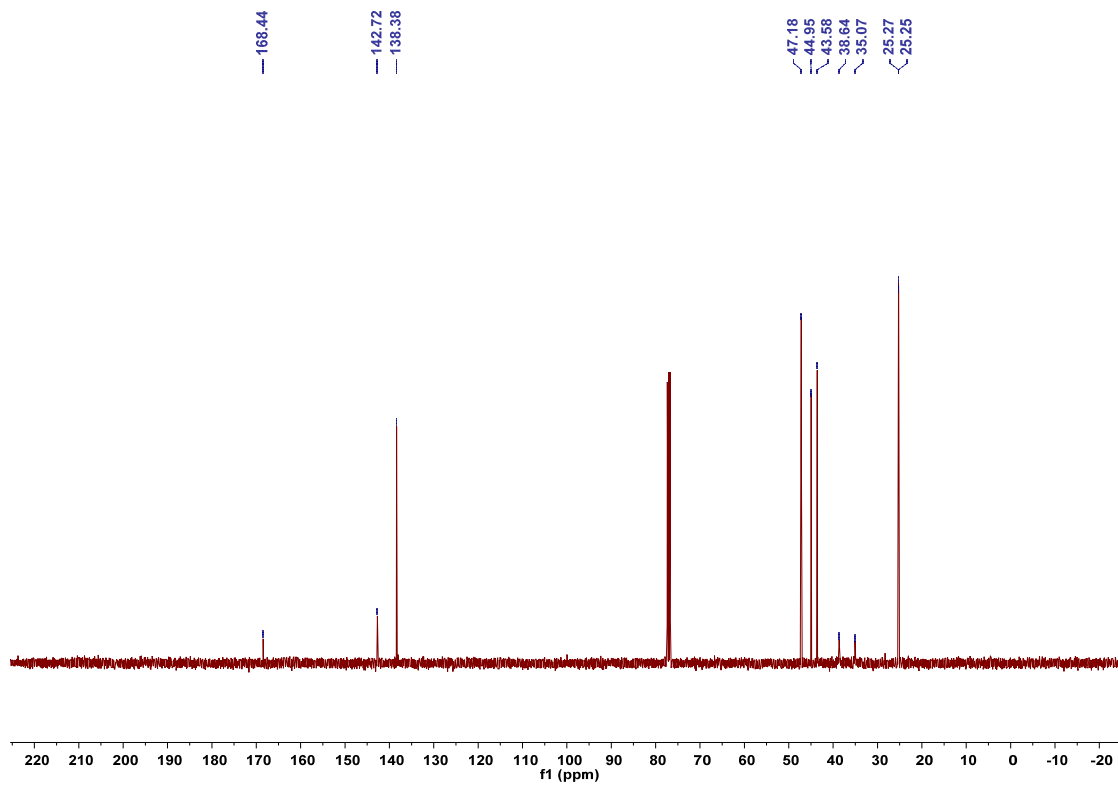

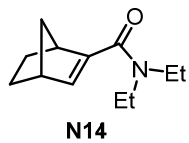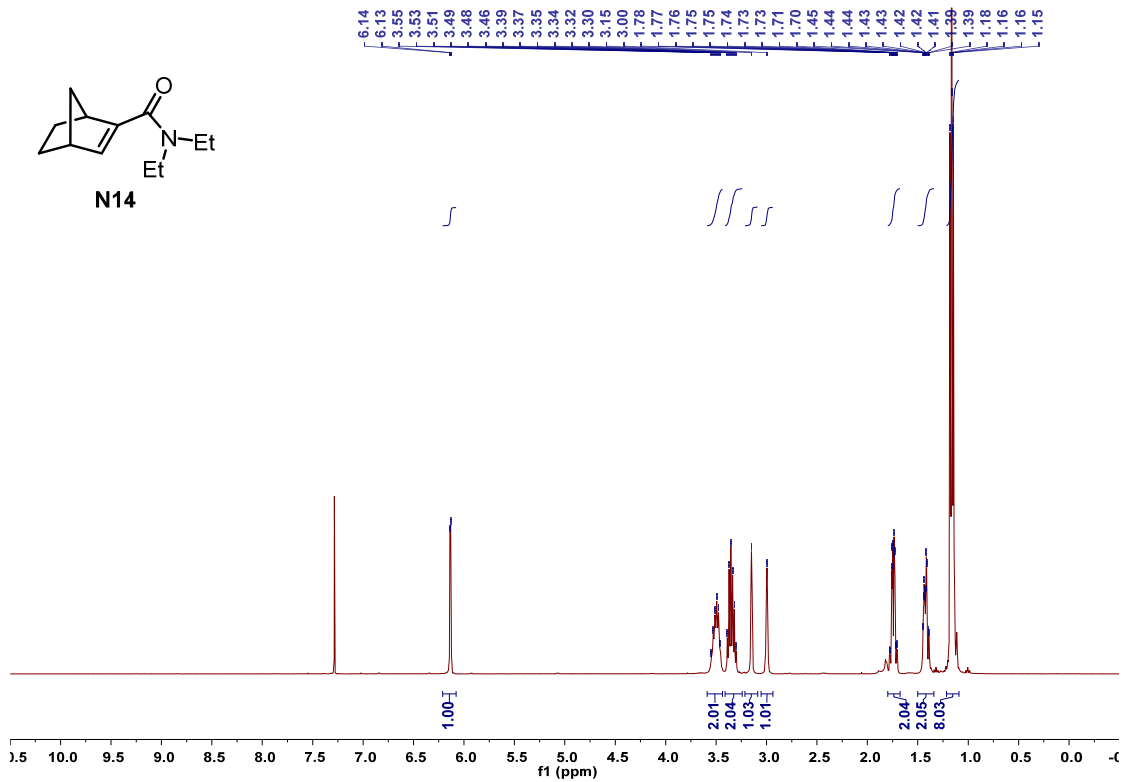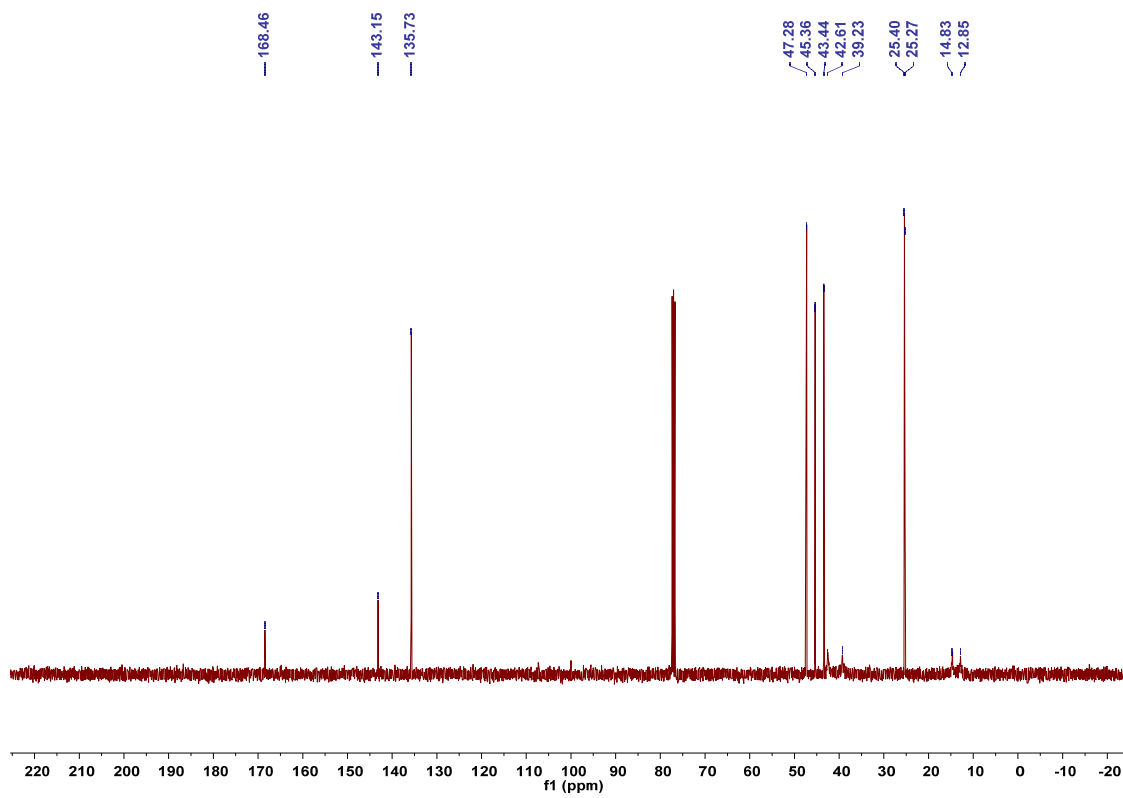

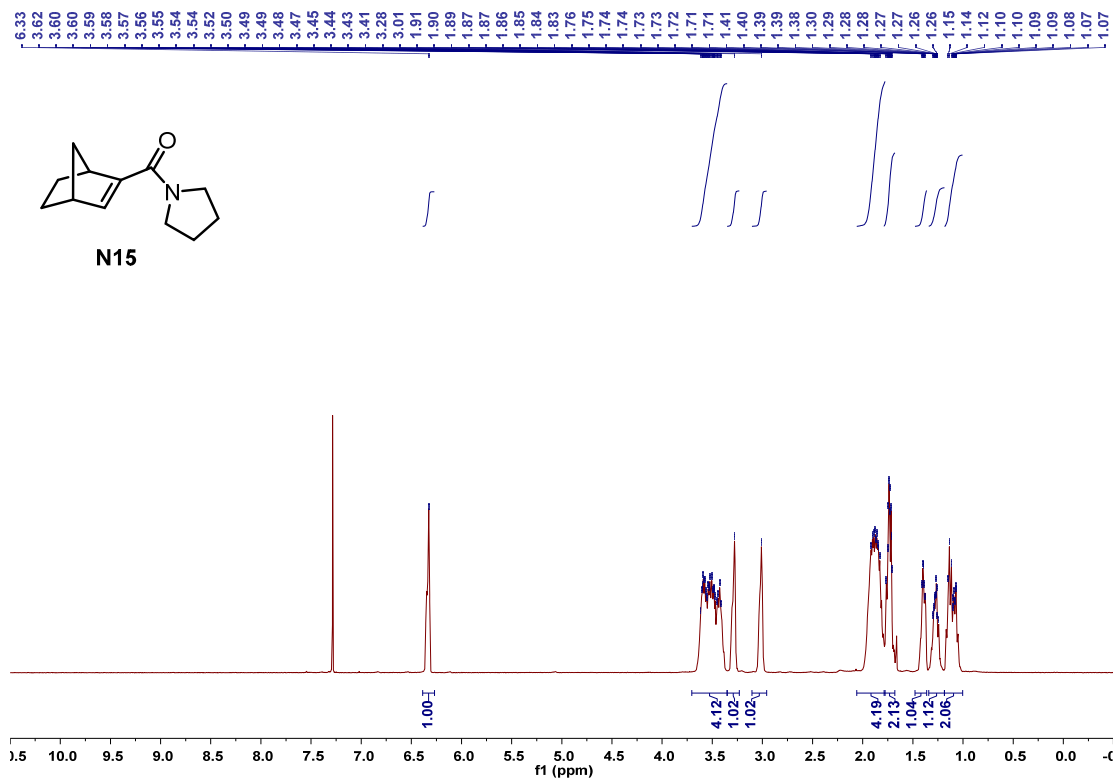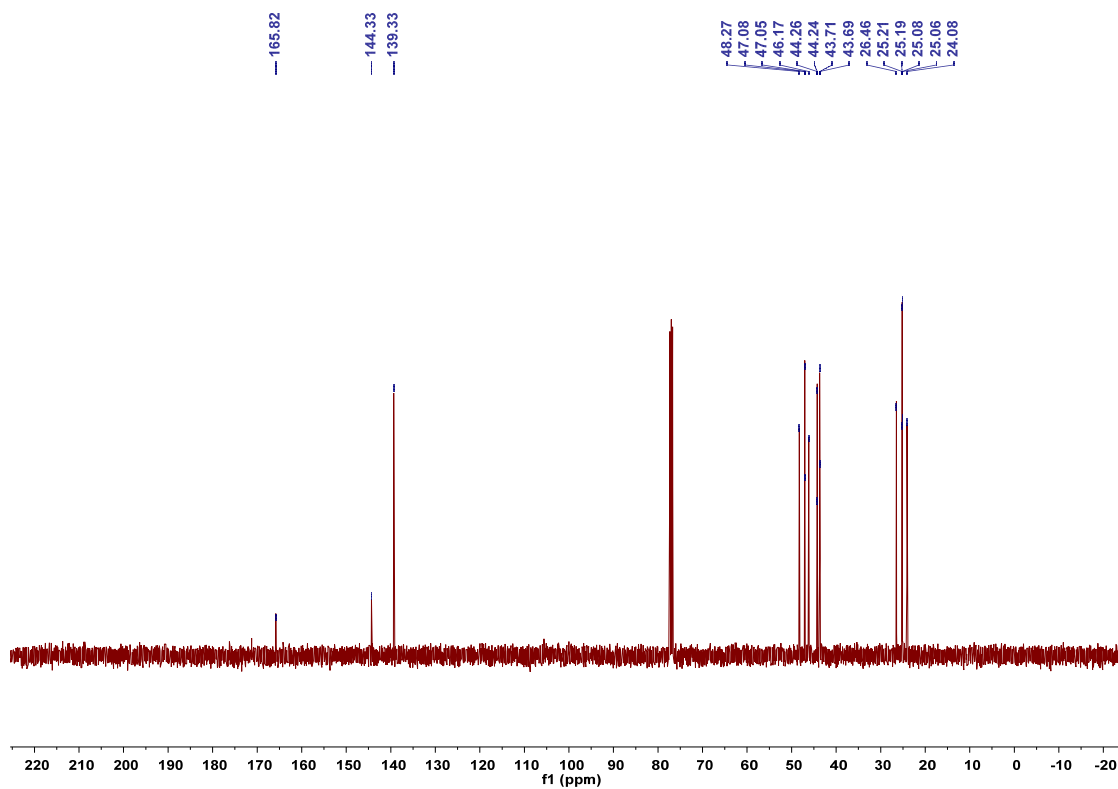

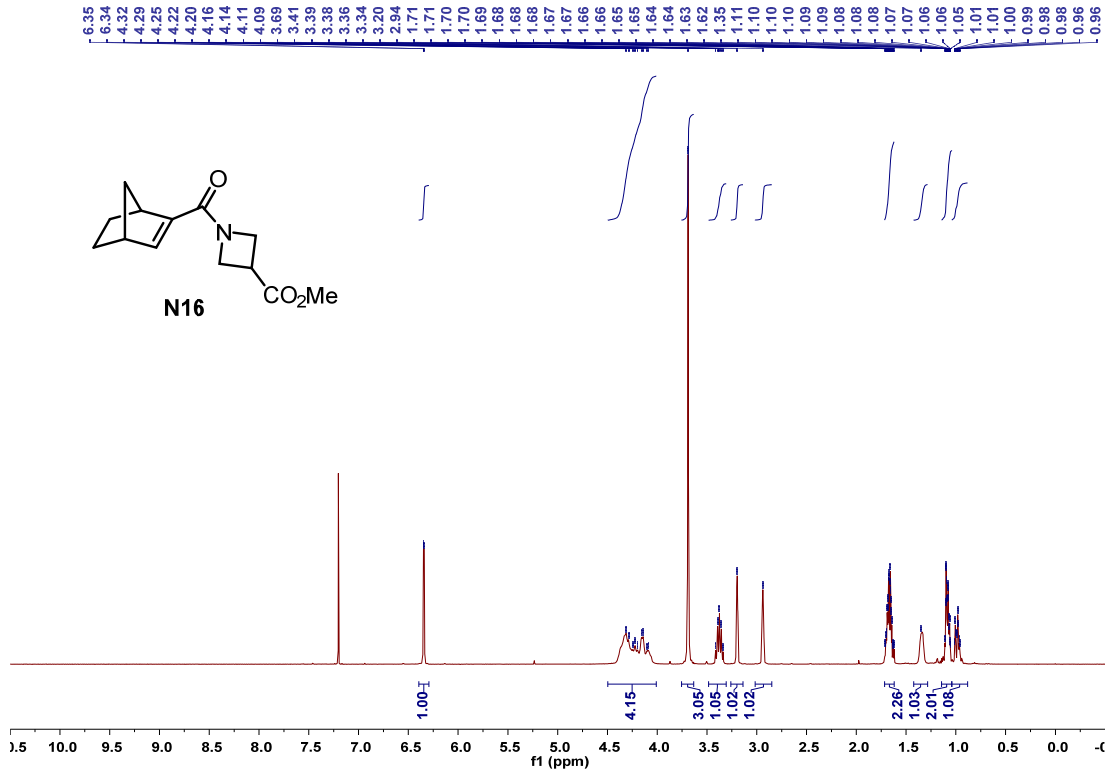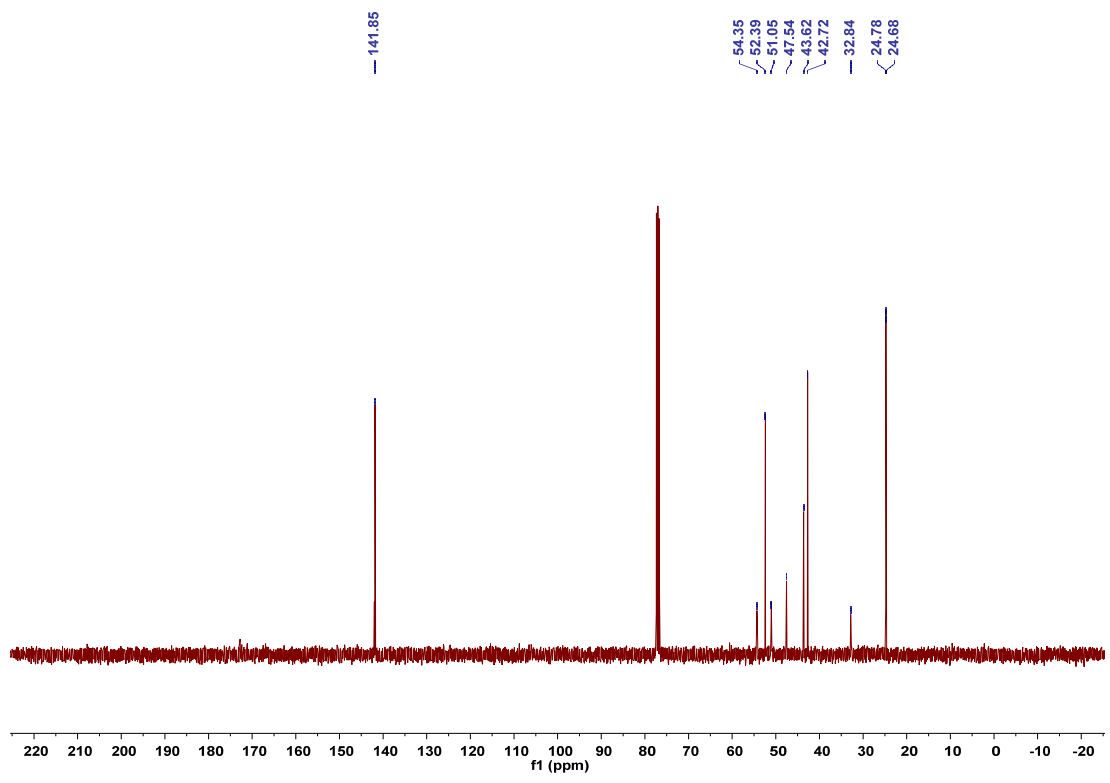



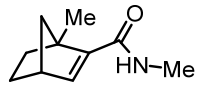

**N18**

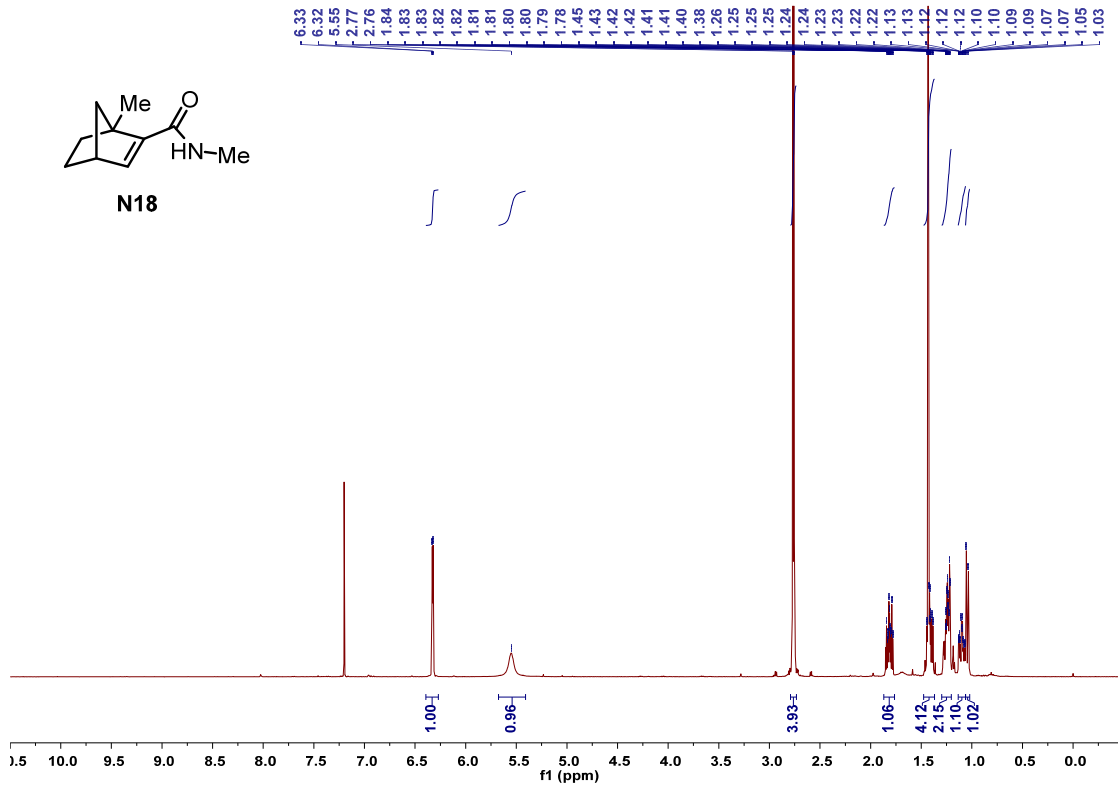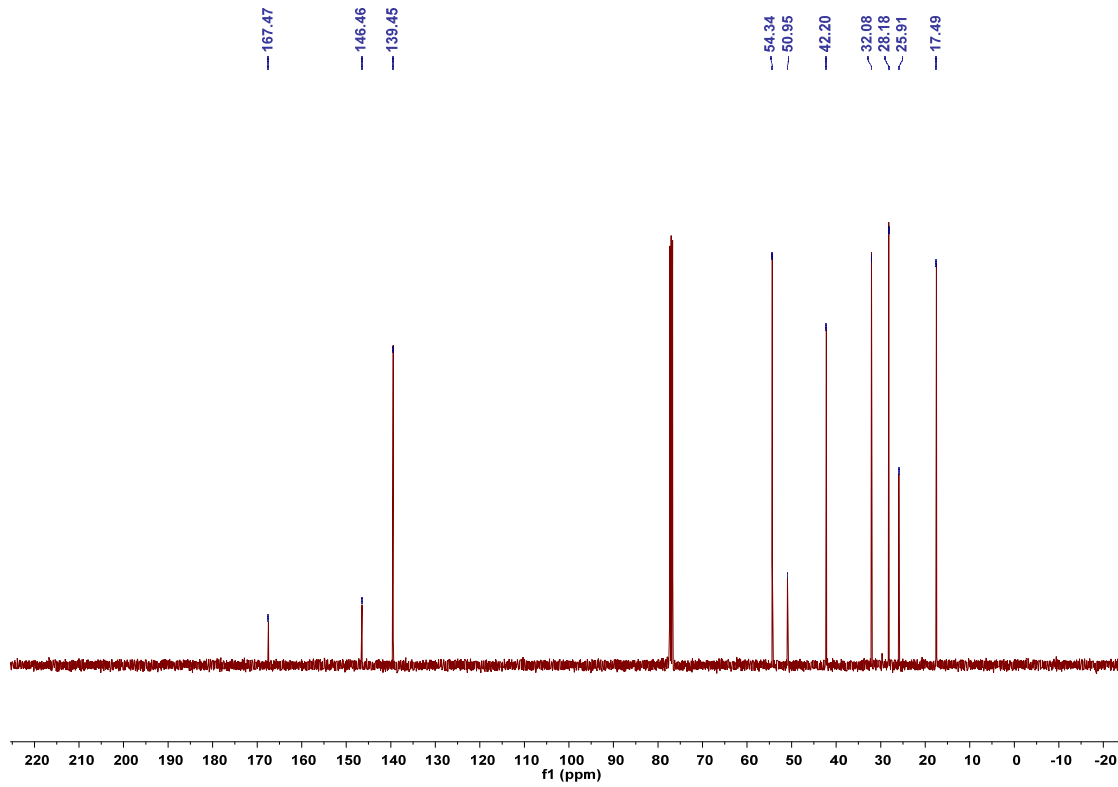



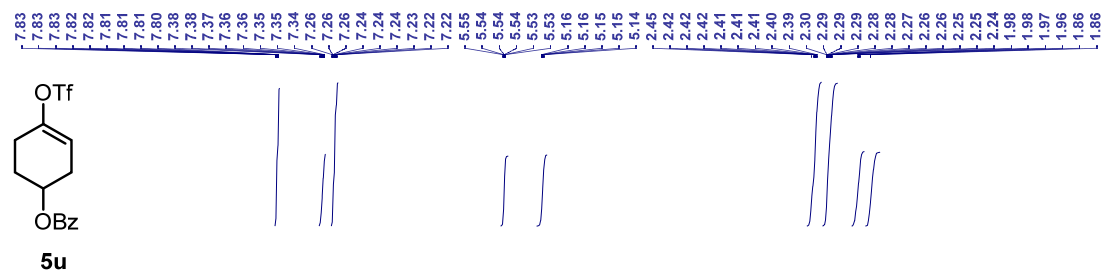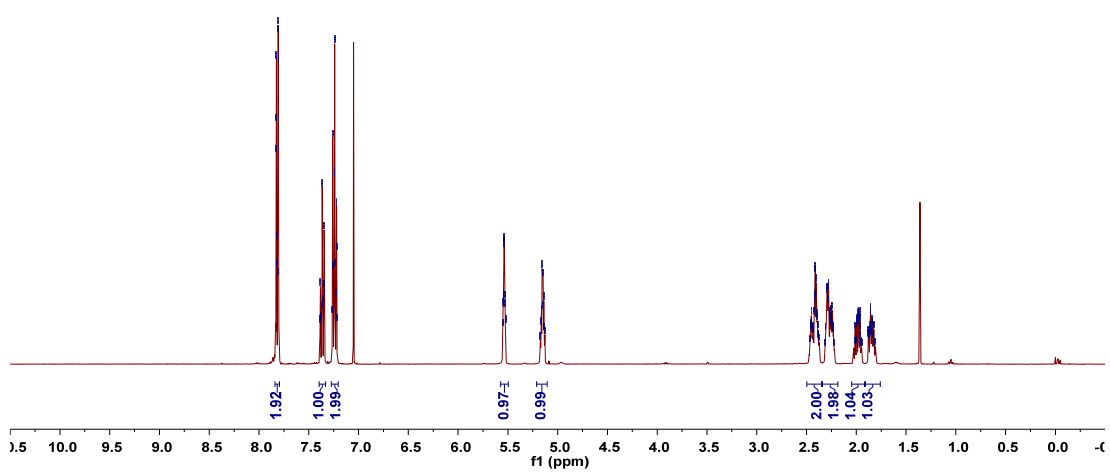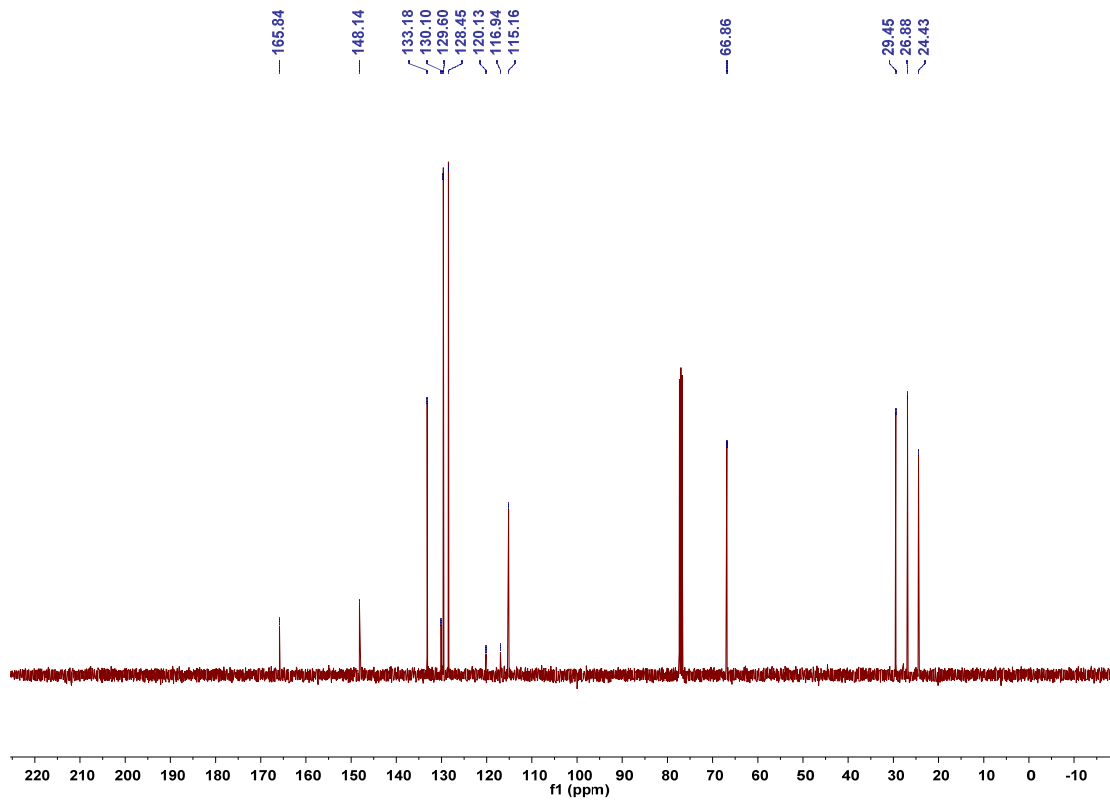

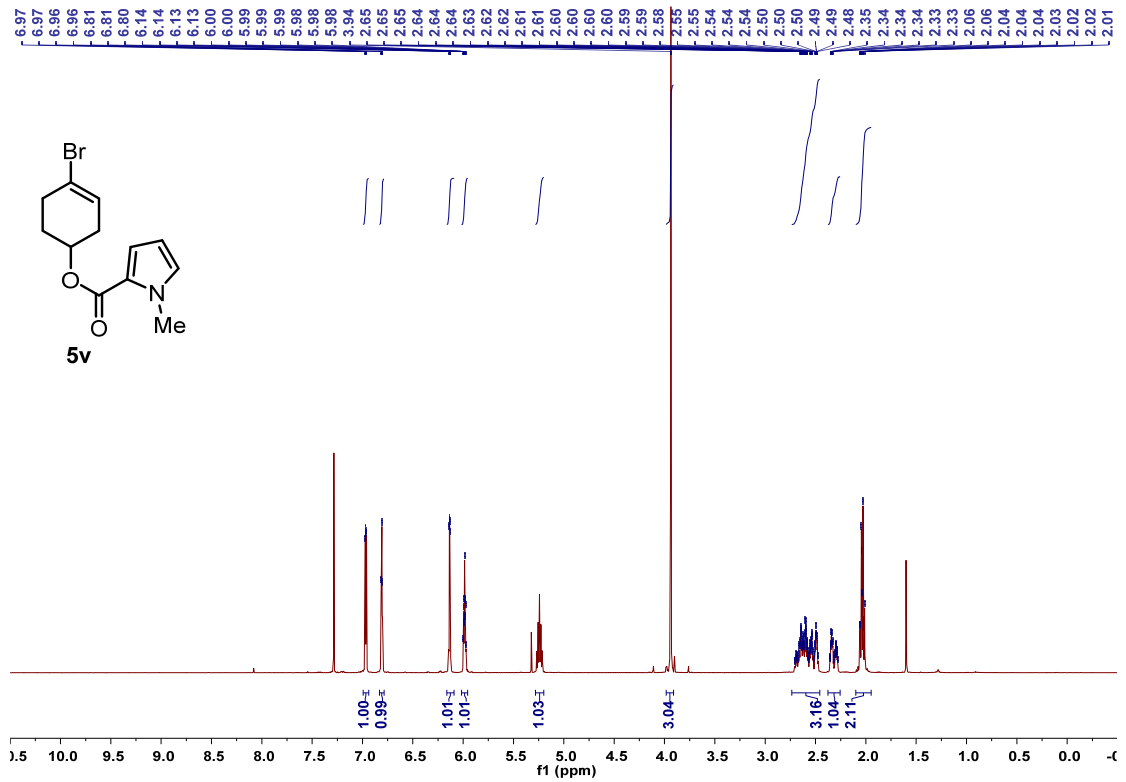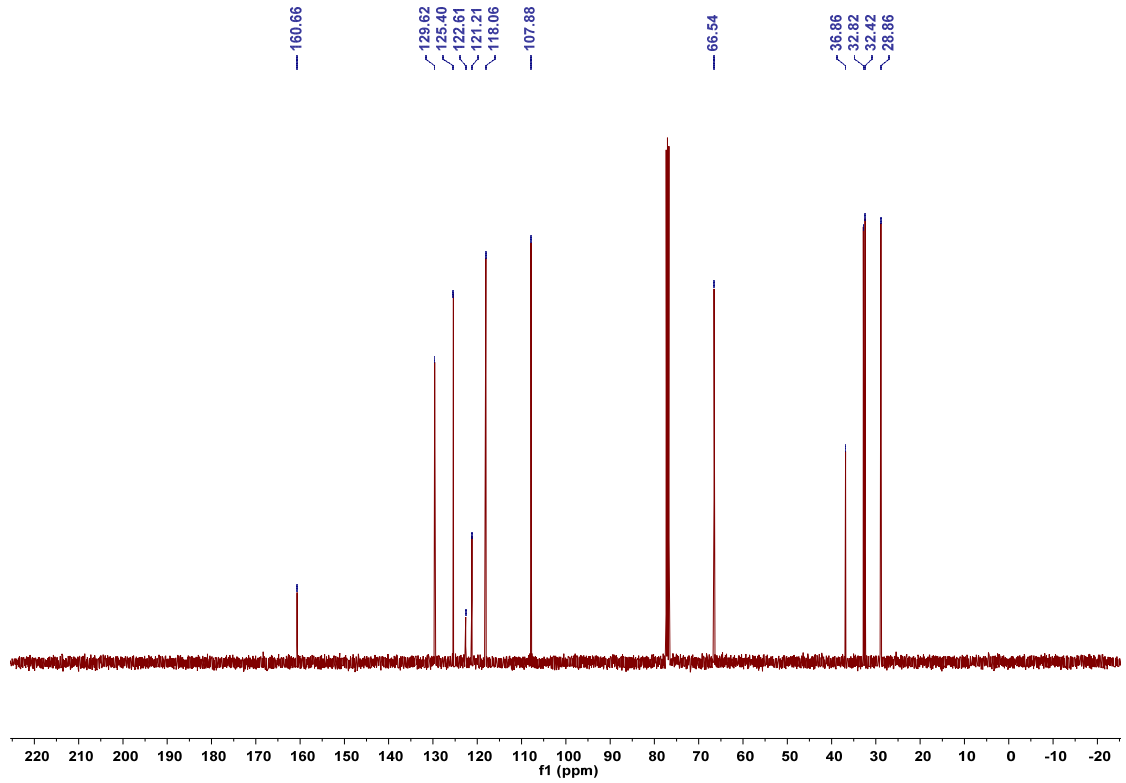

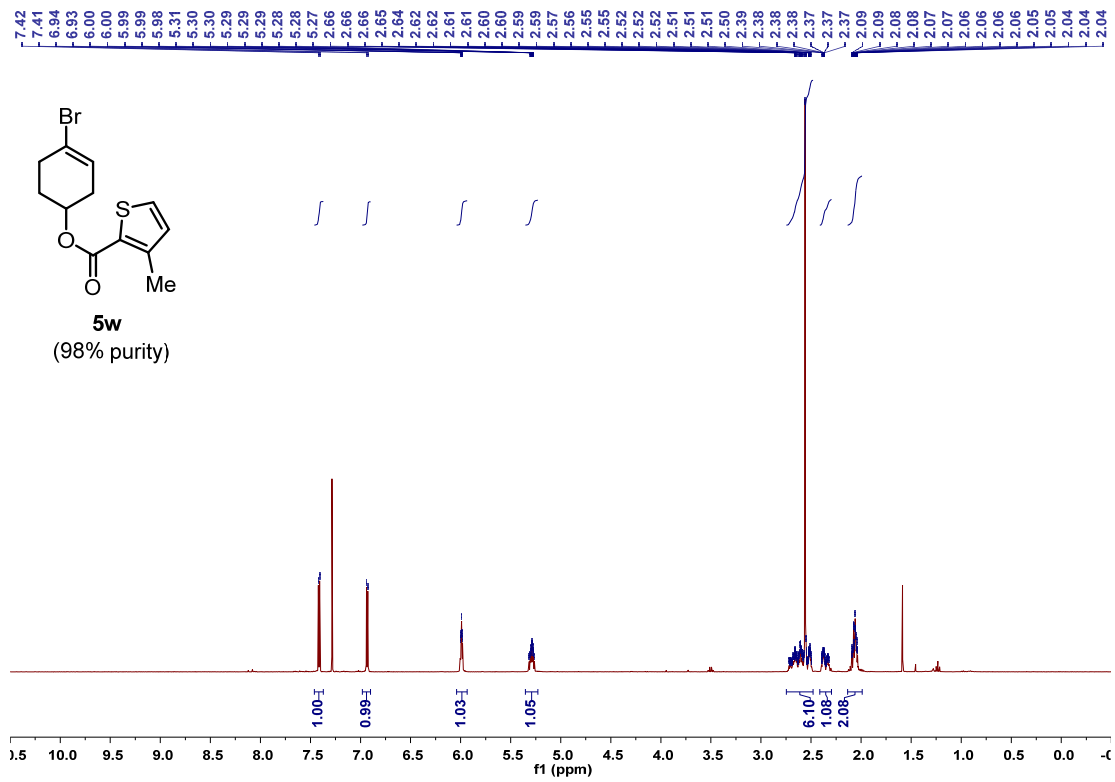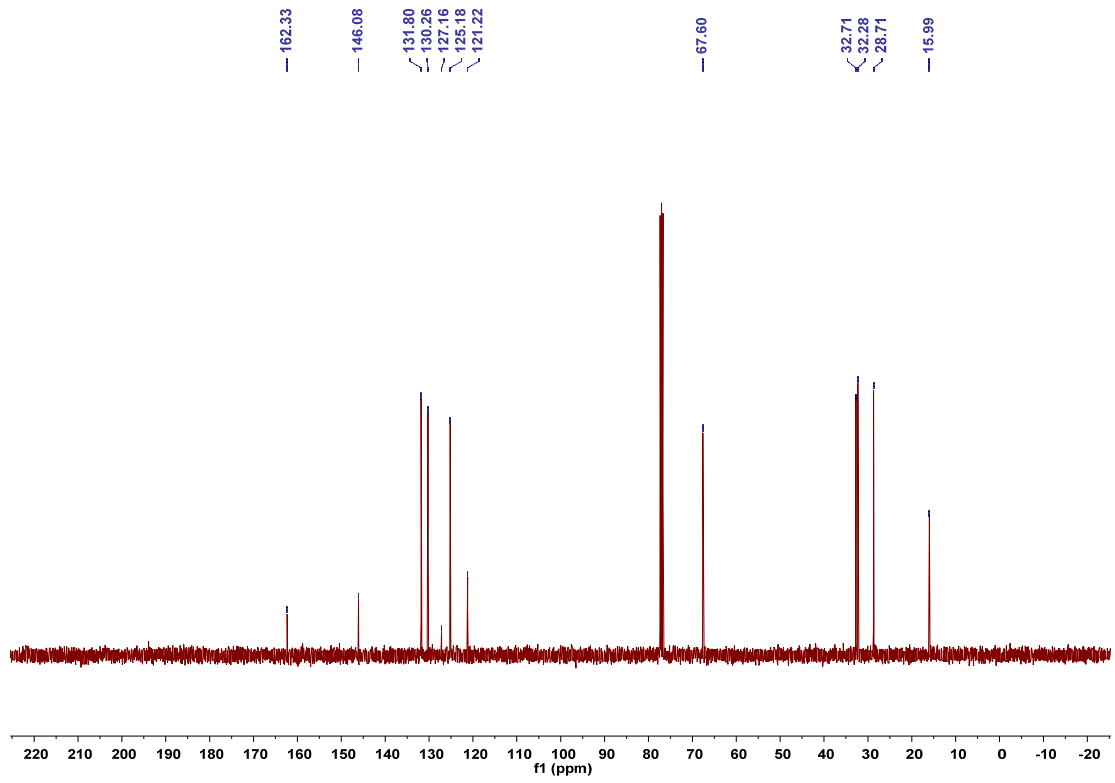

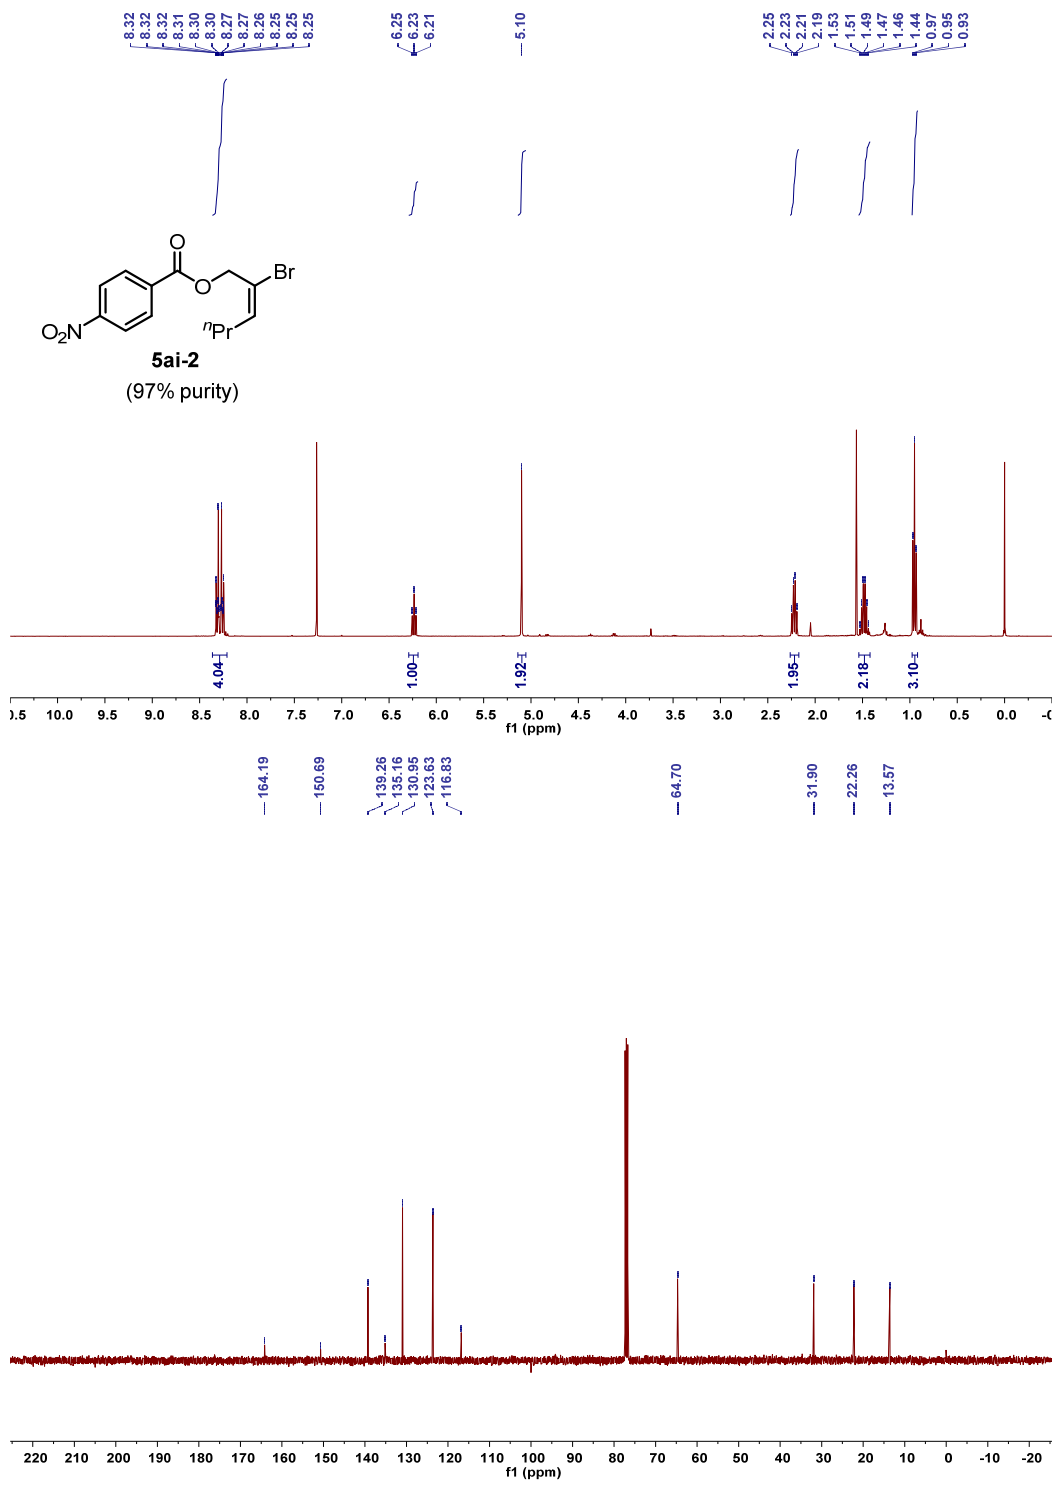

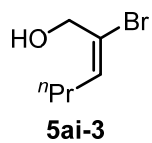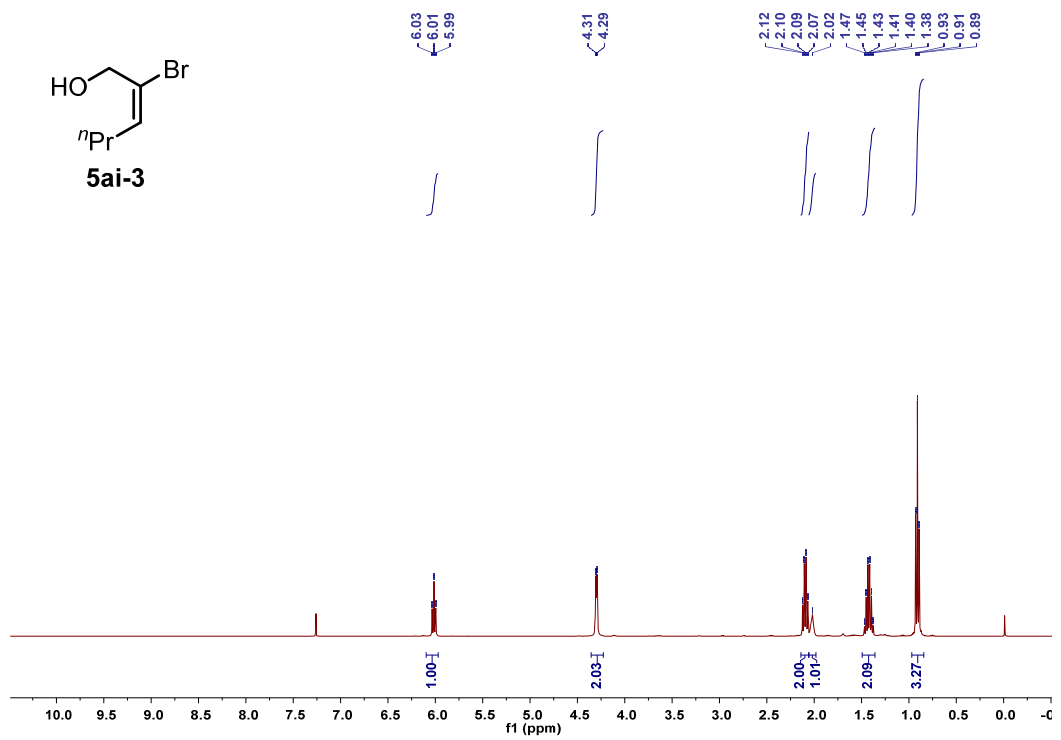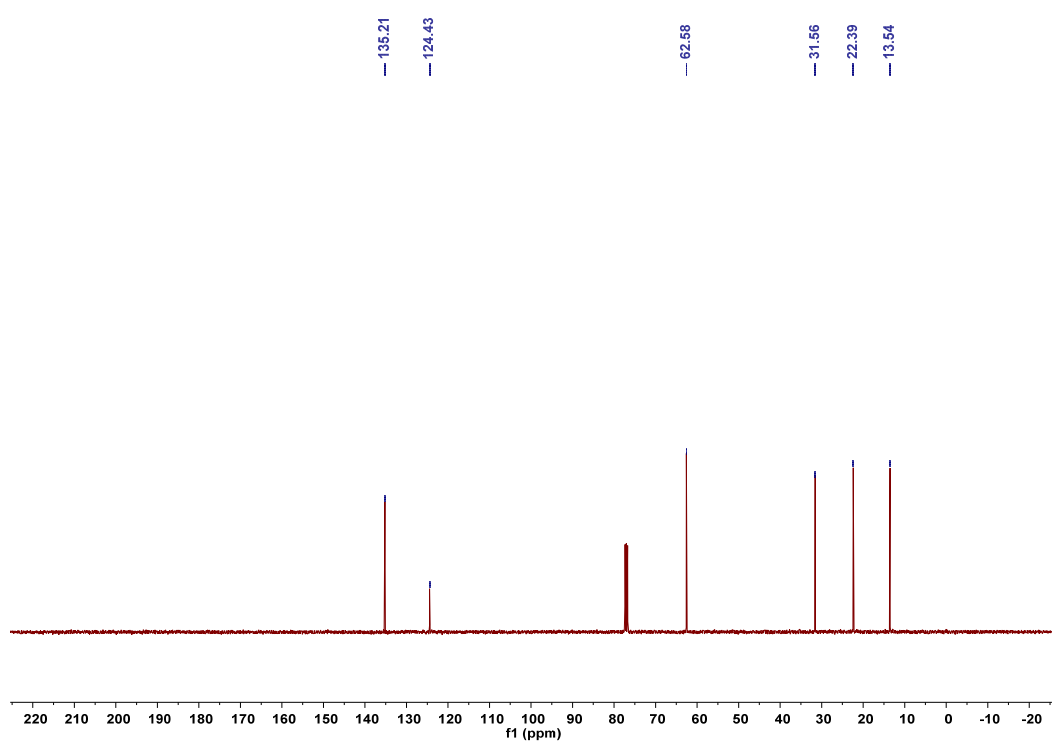

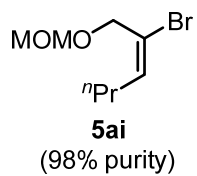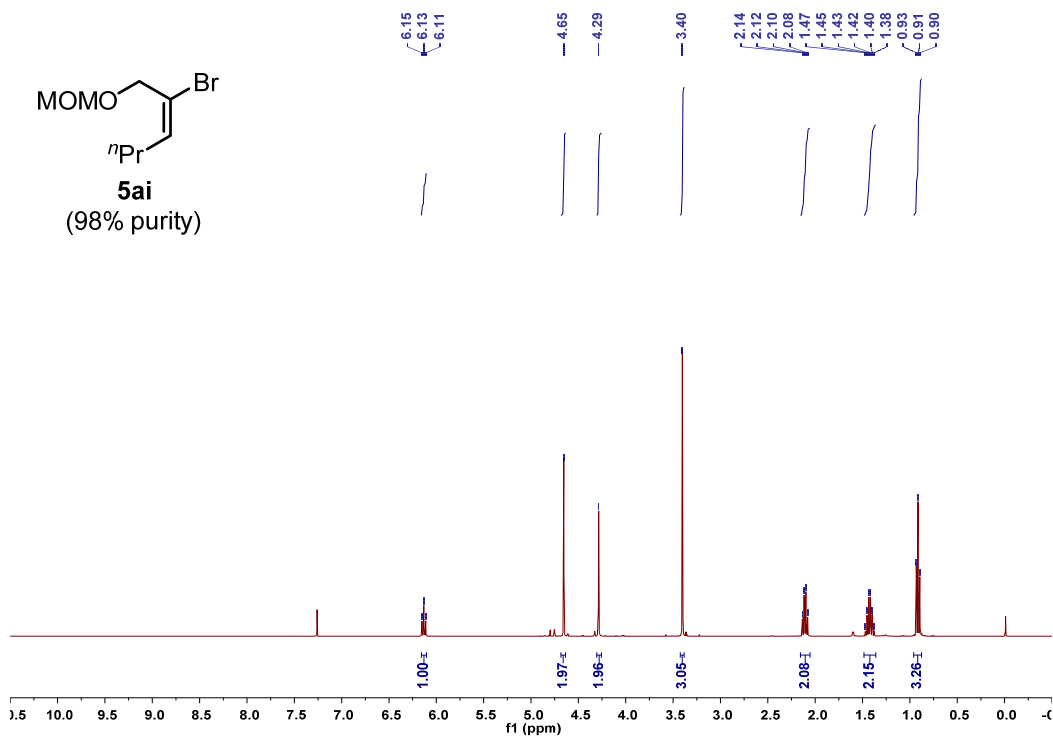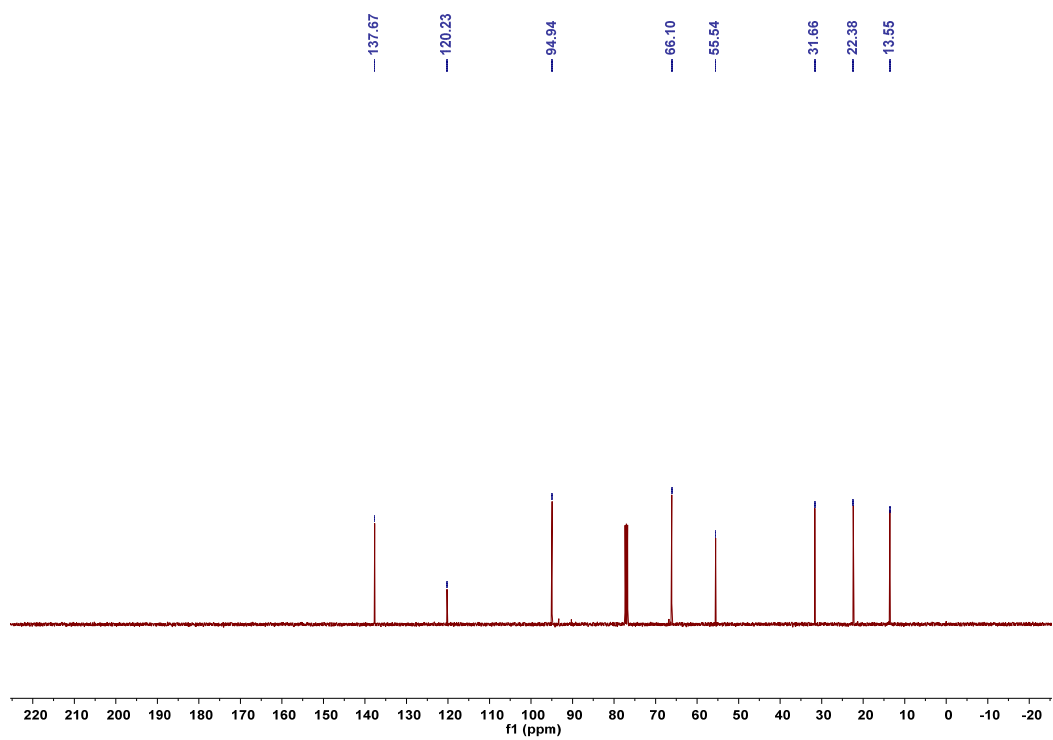

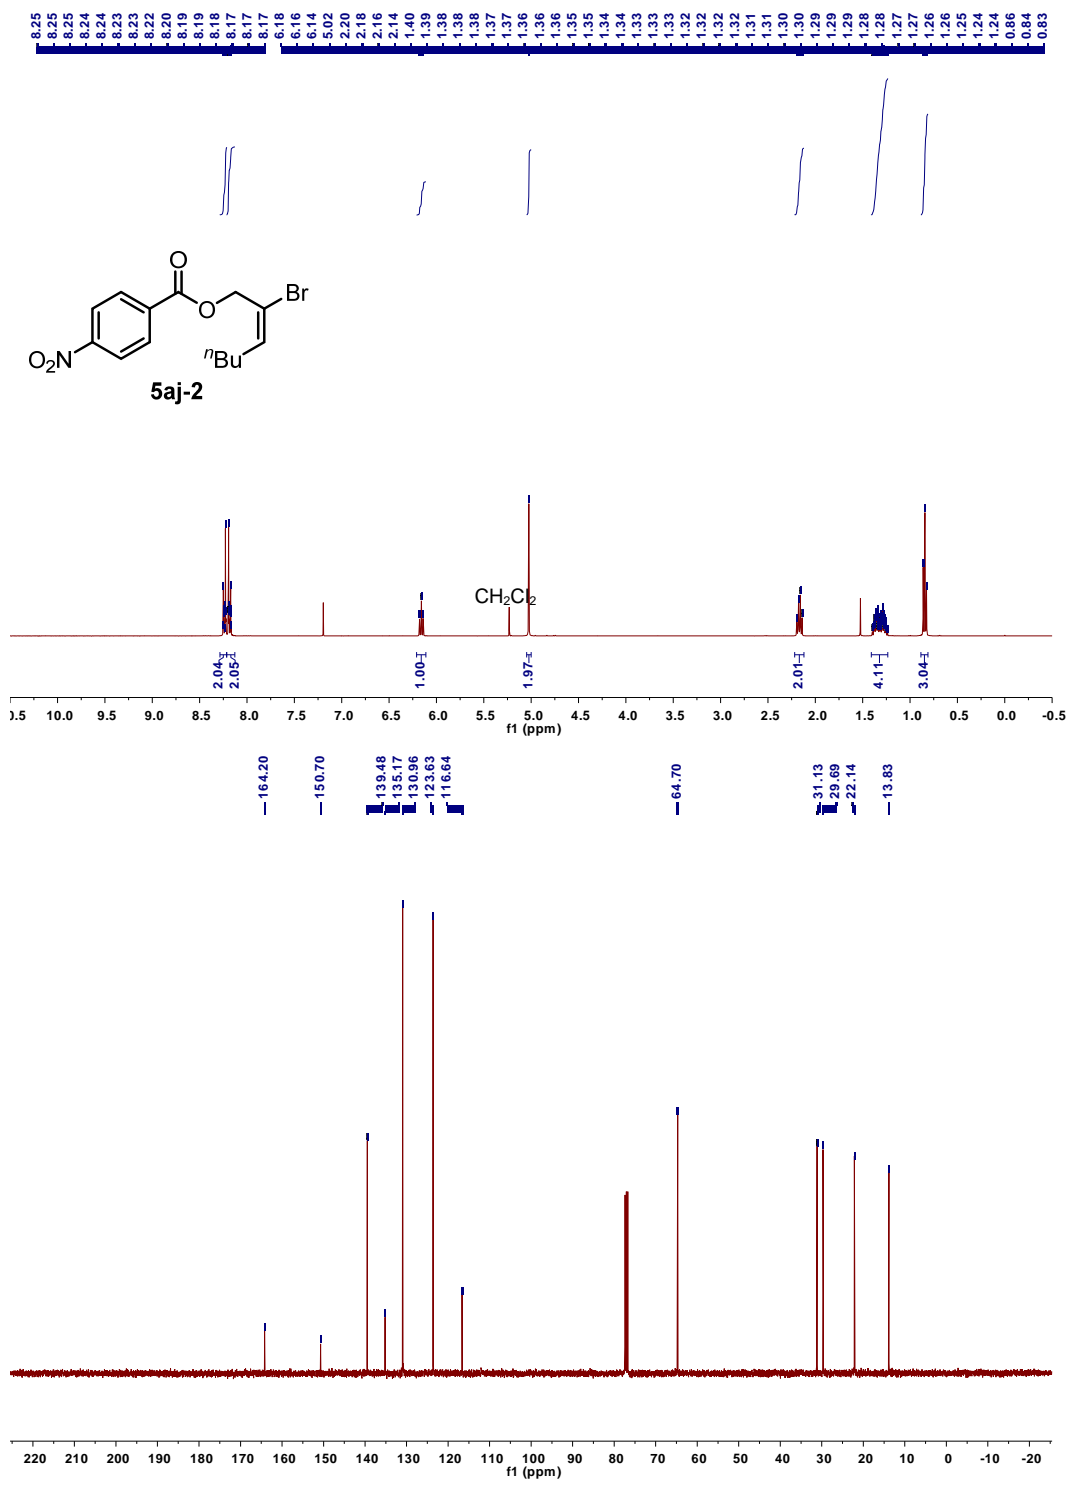

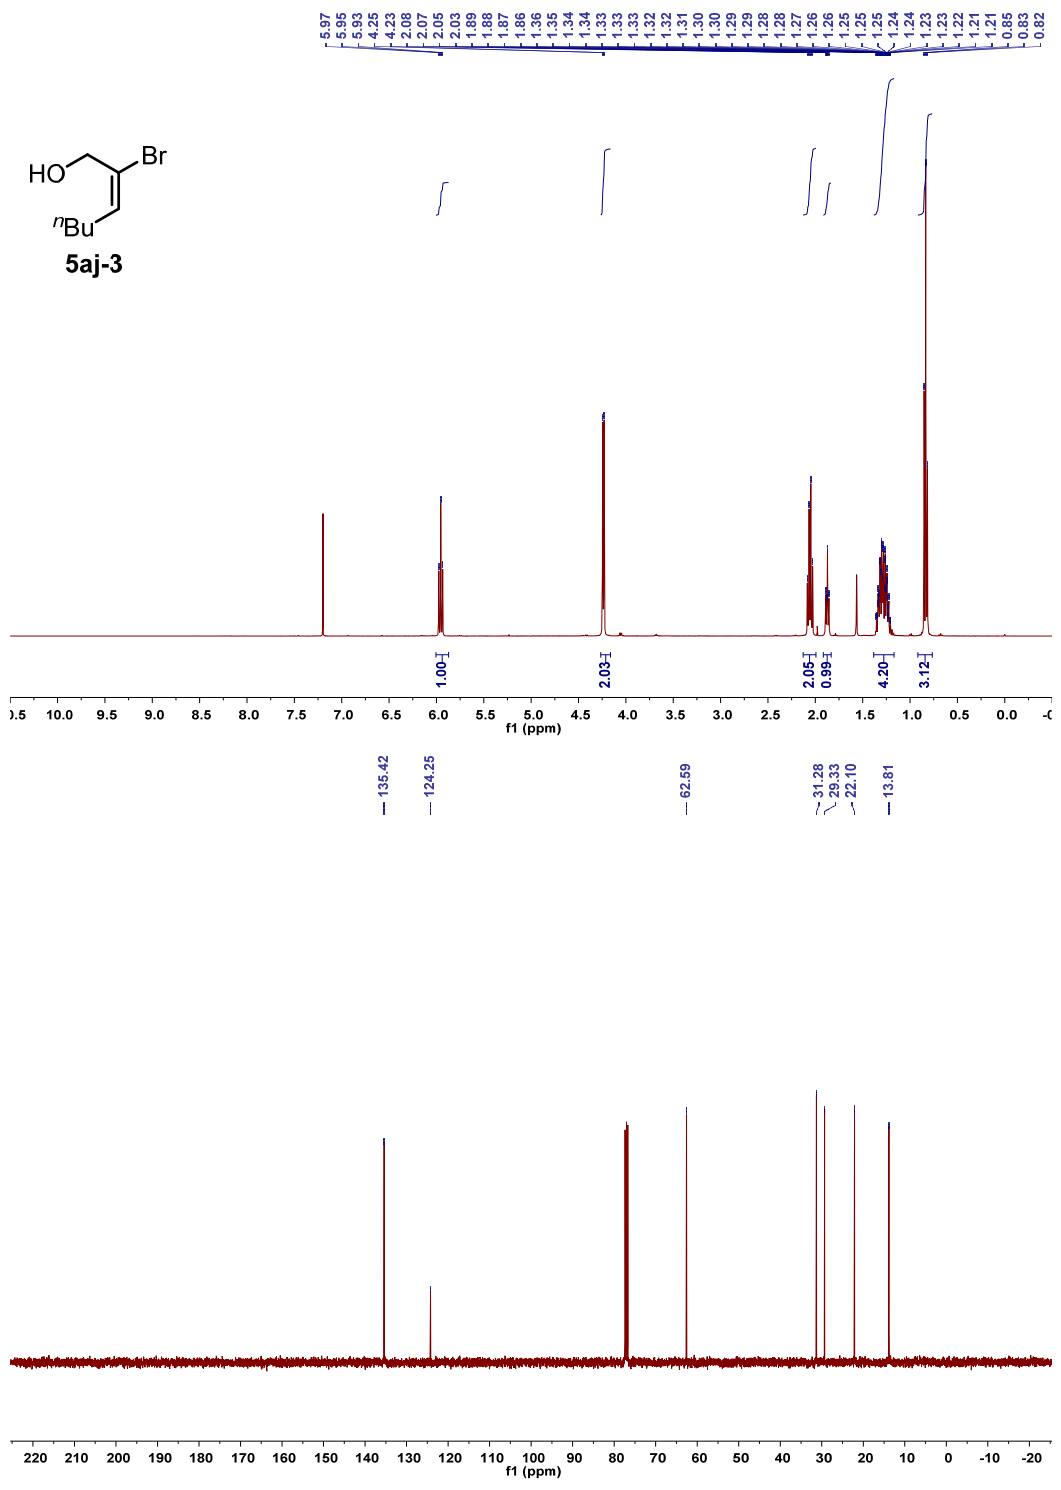



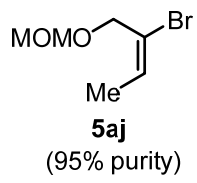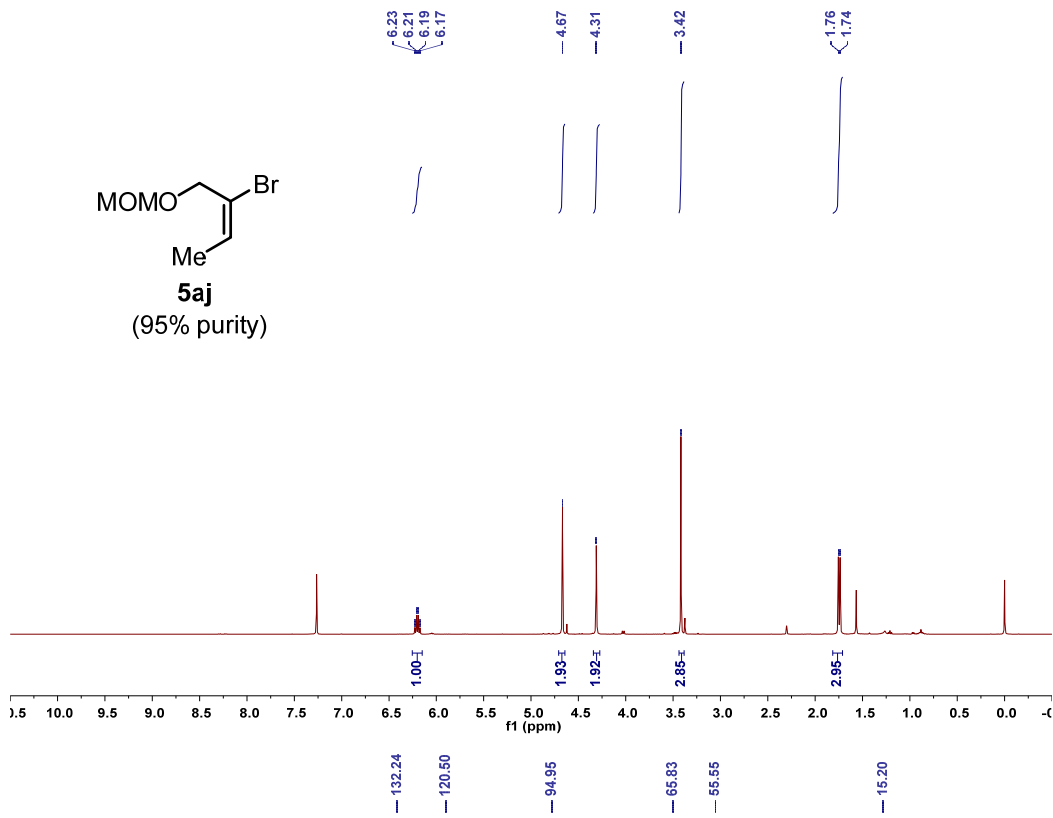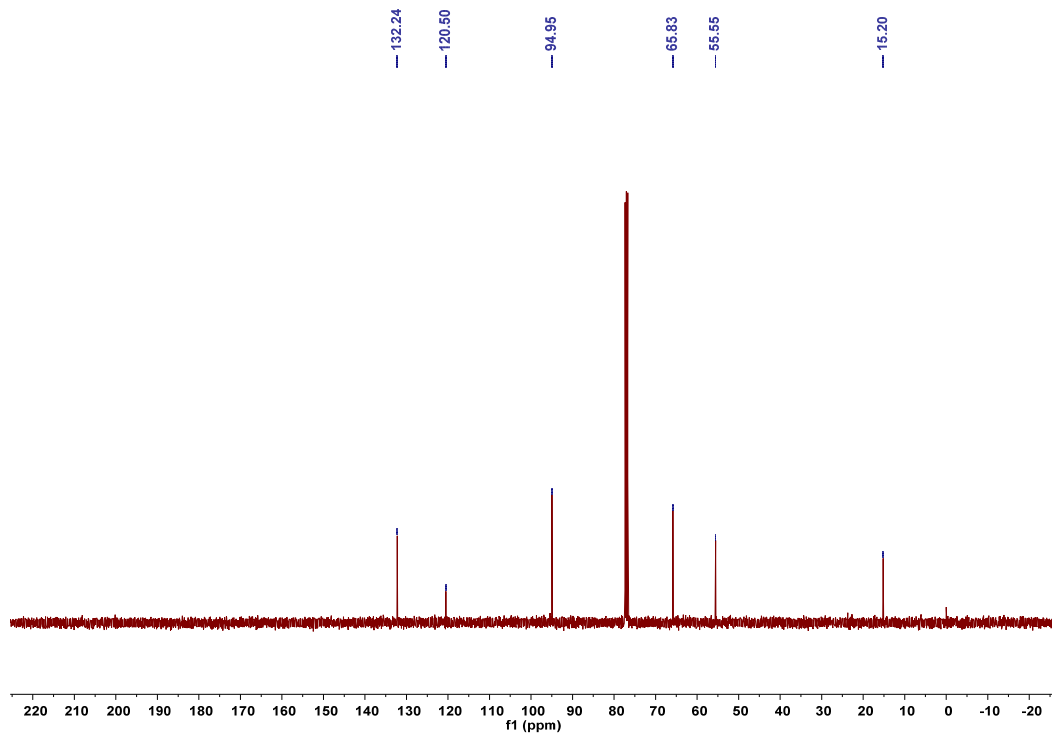

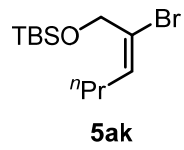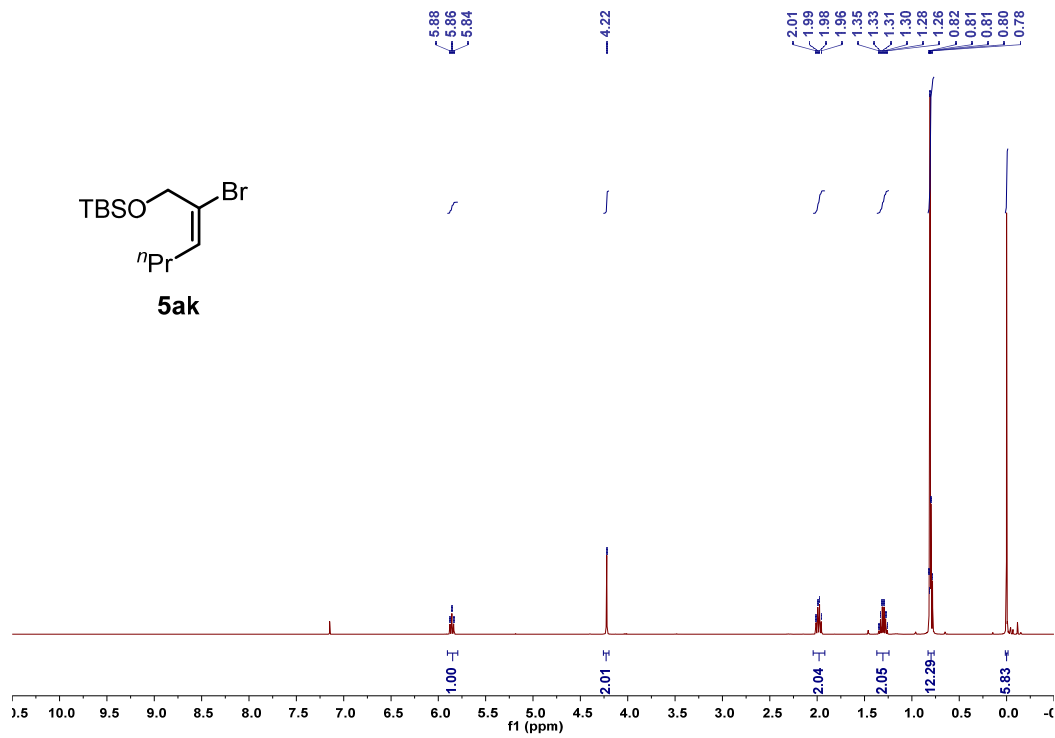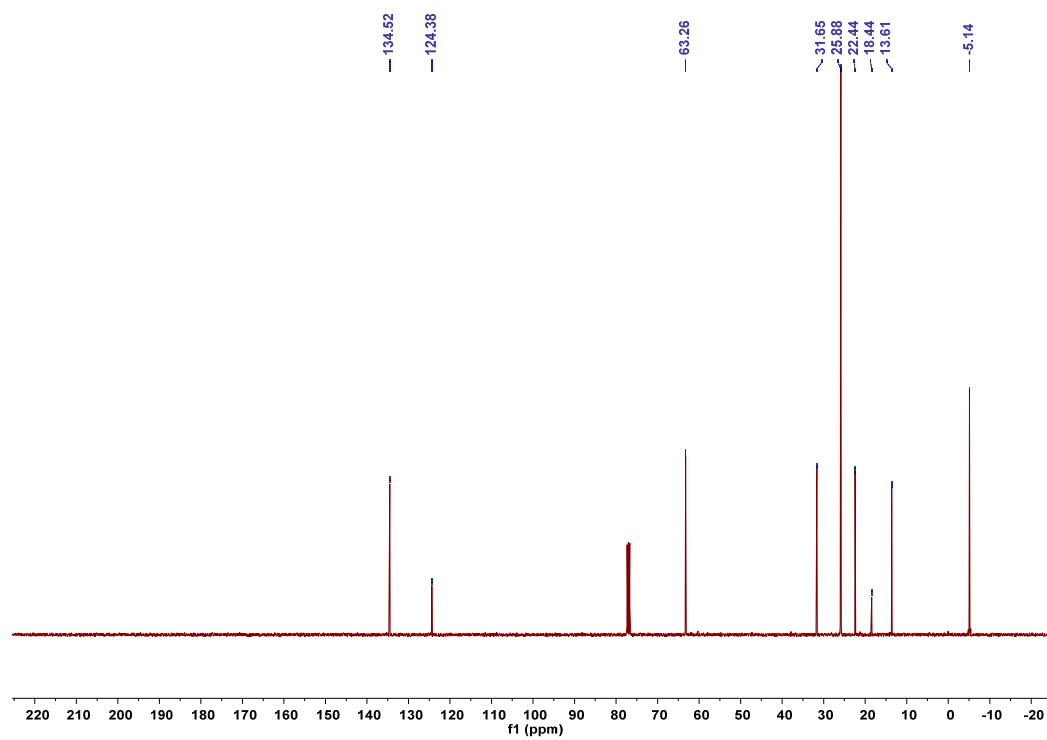

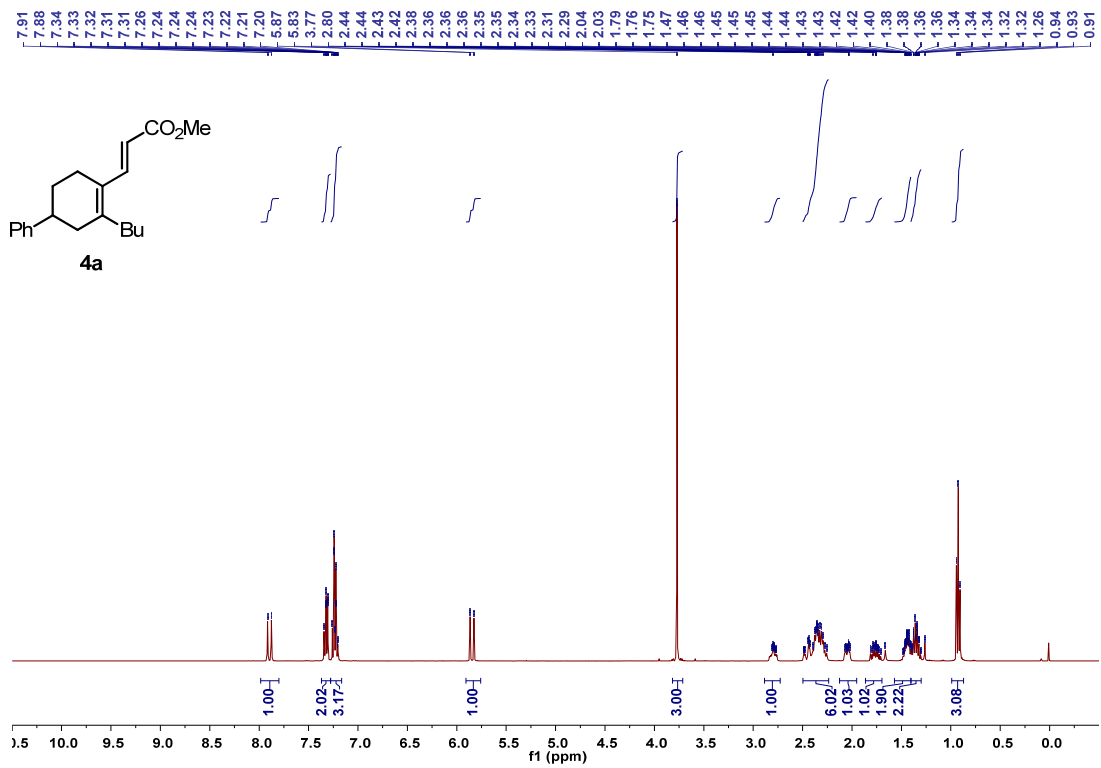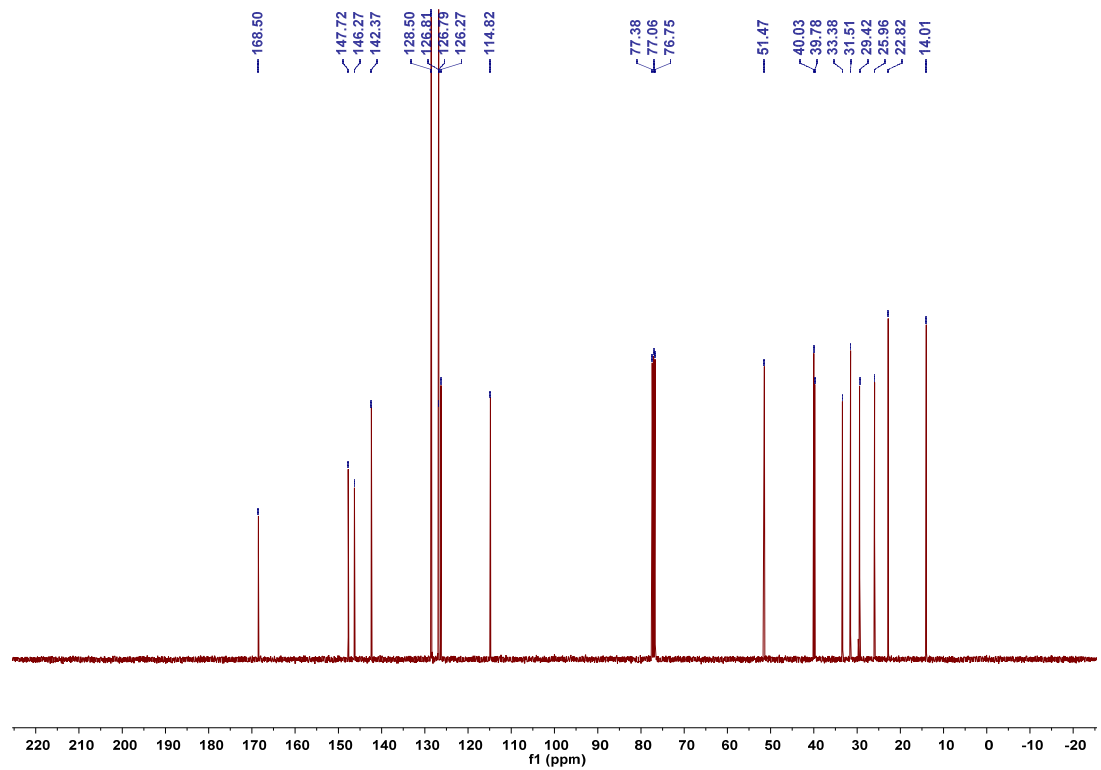

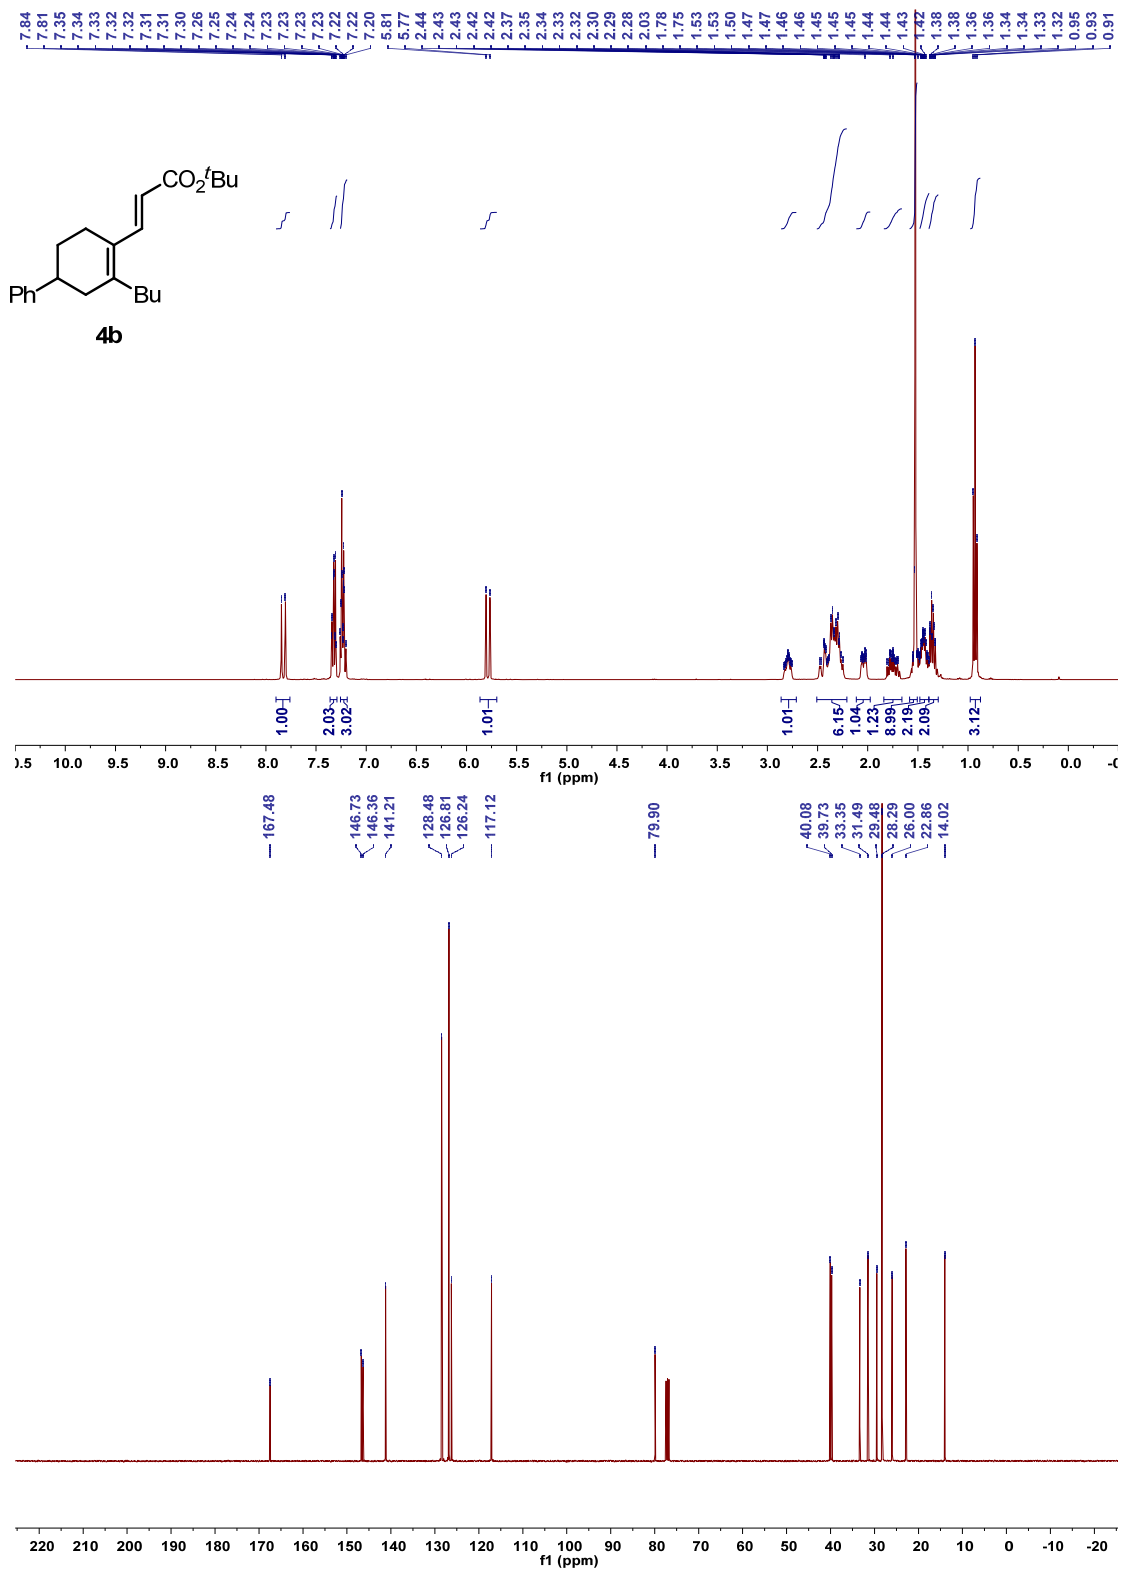

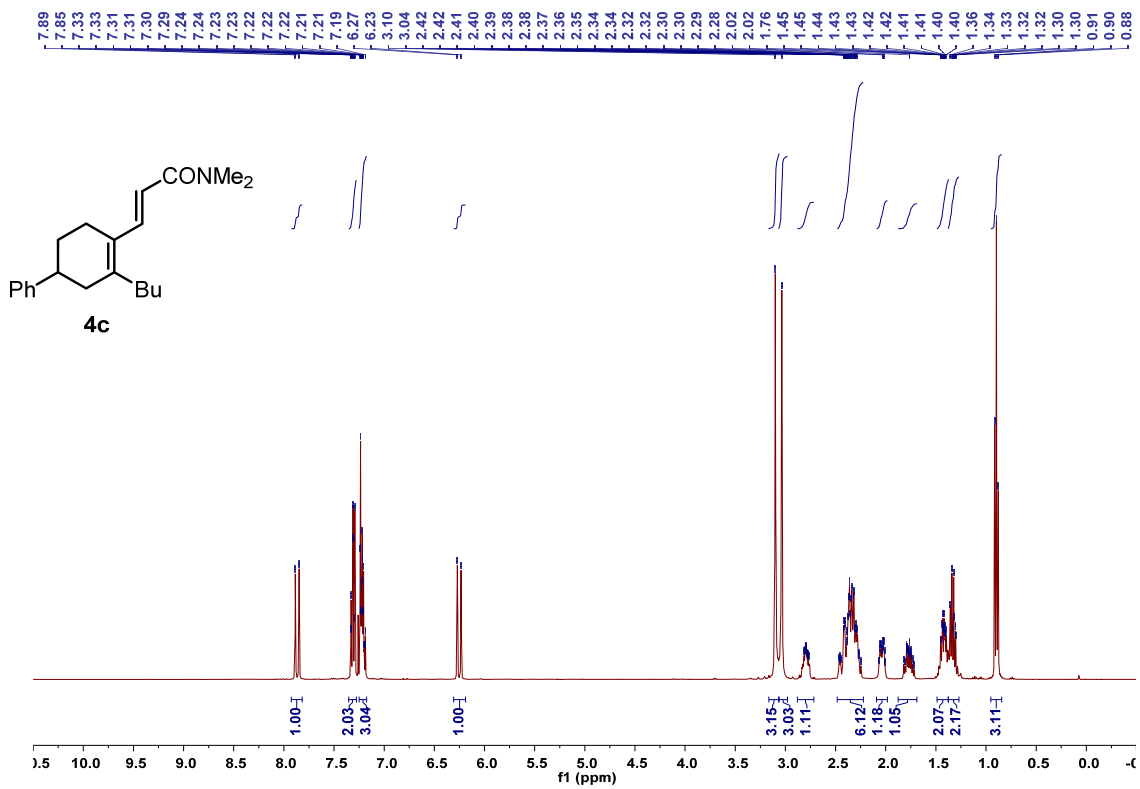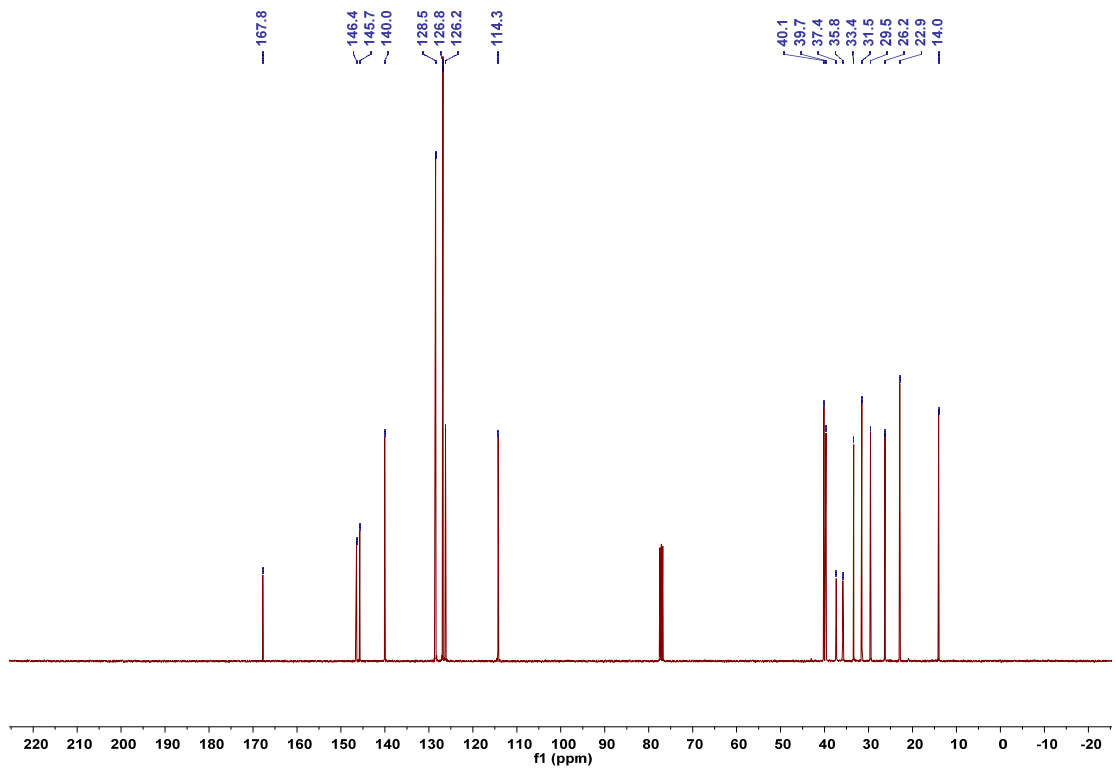

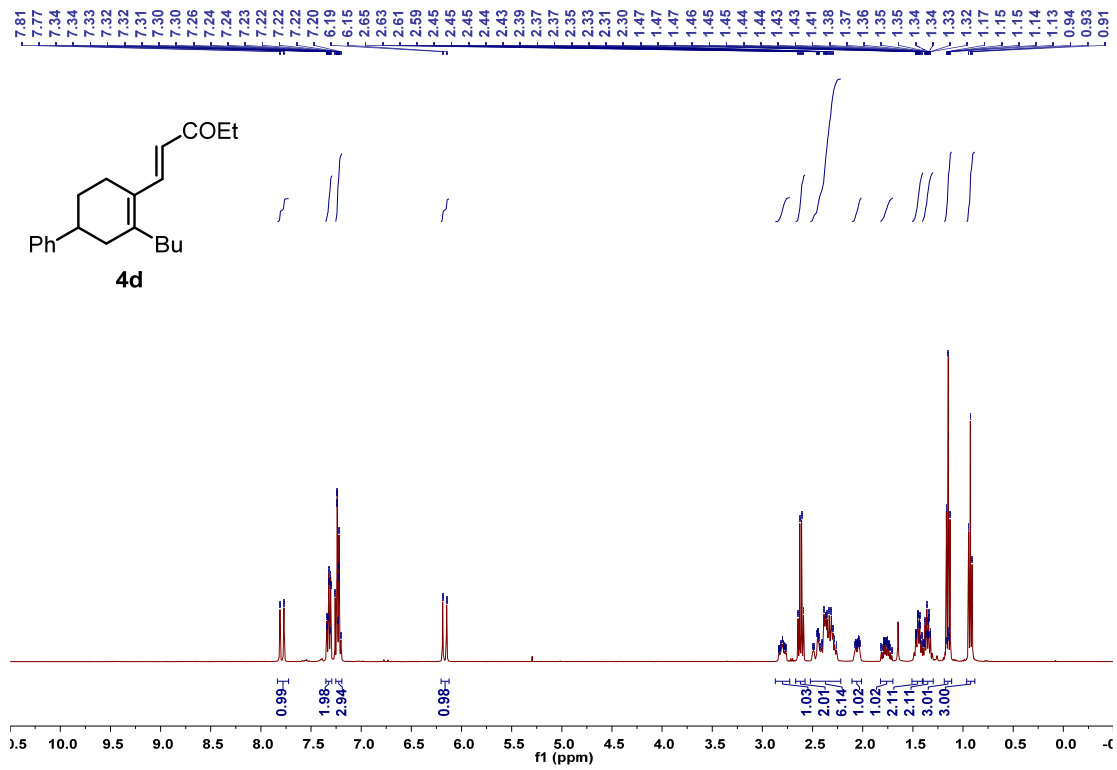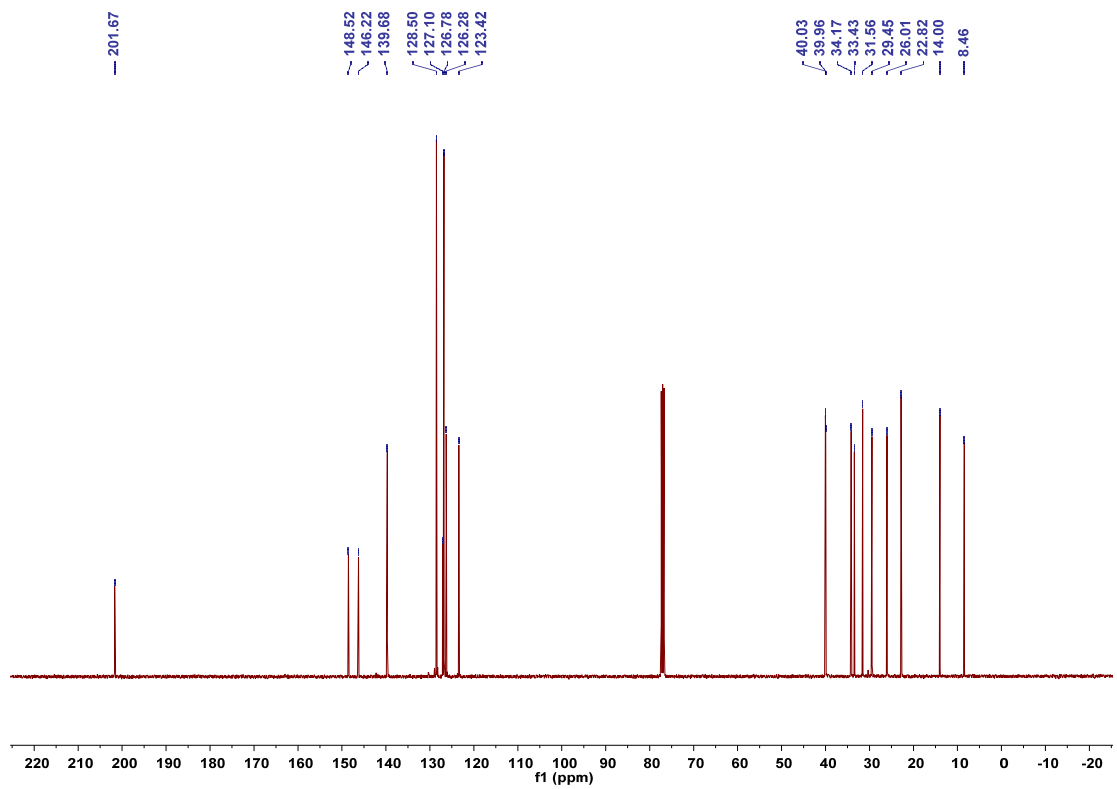

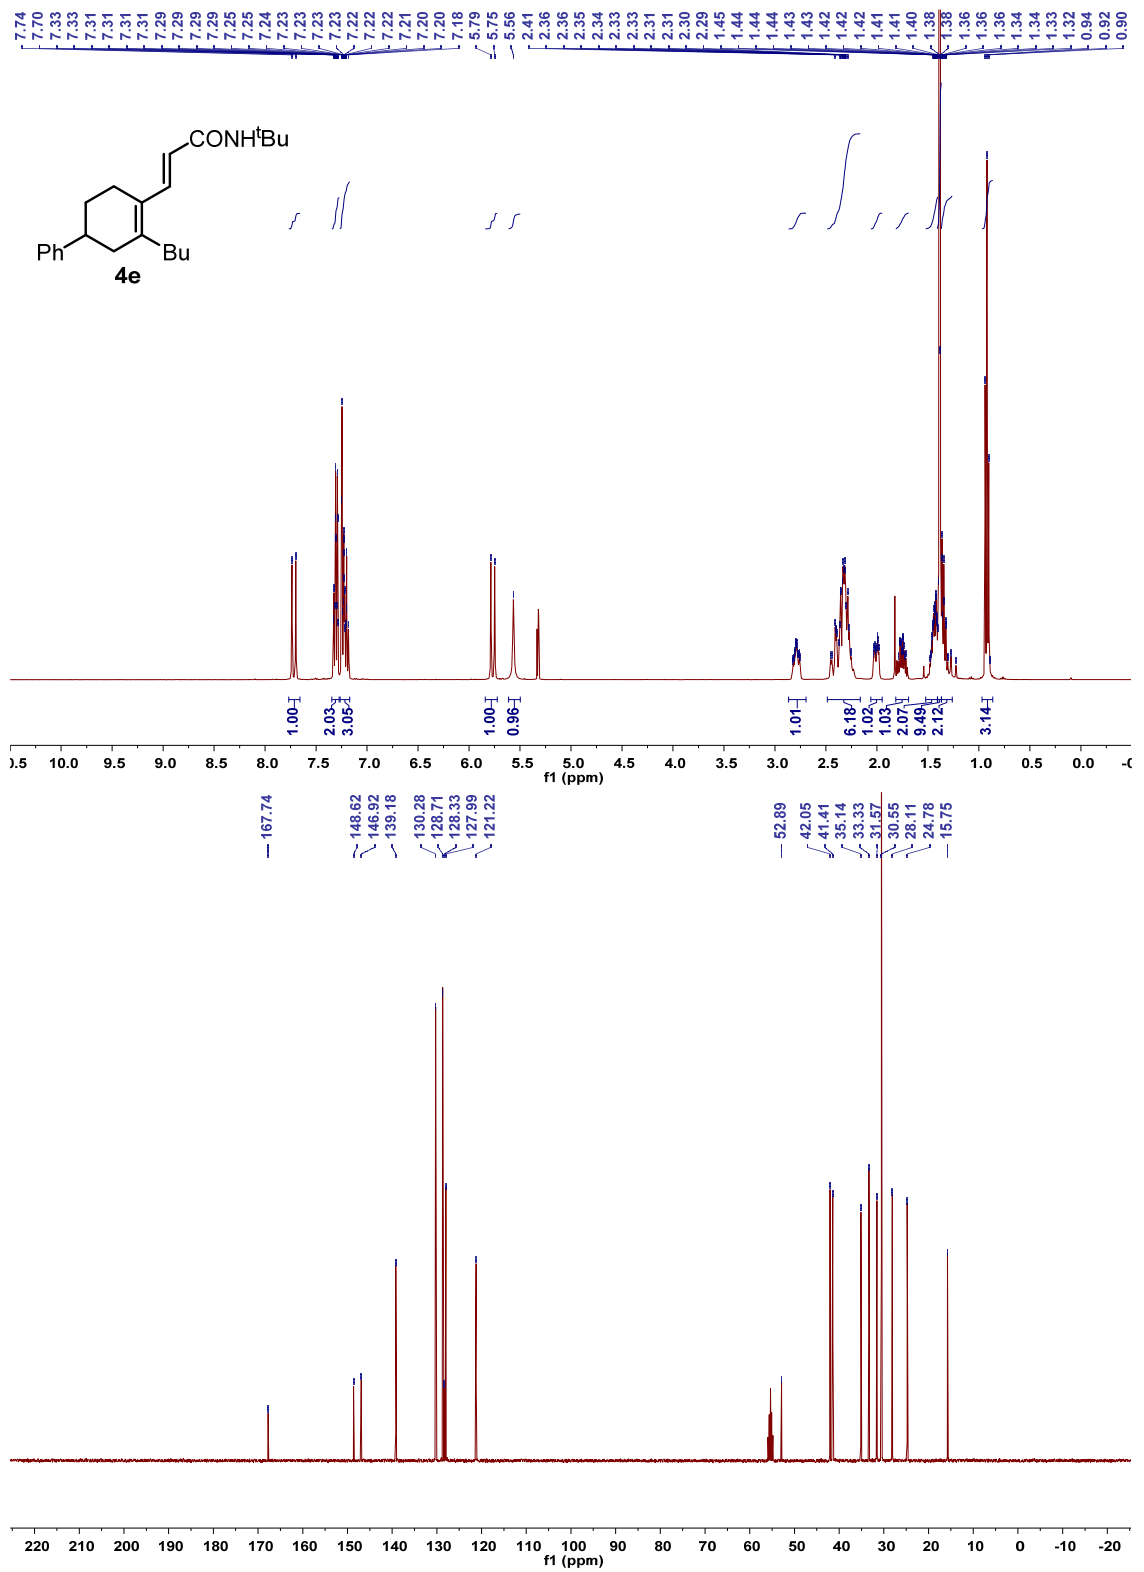

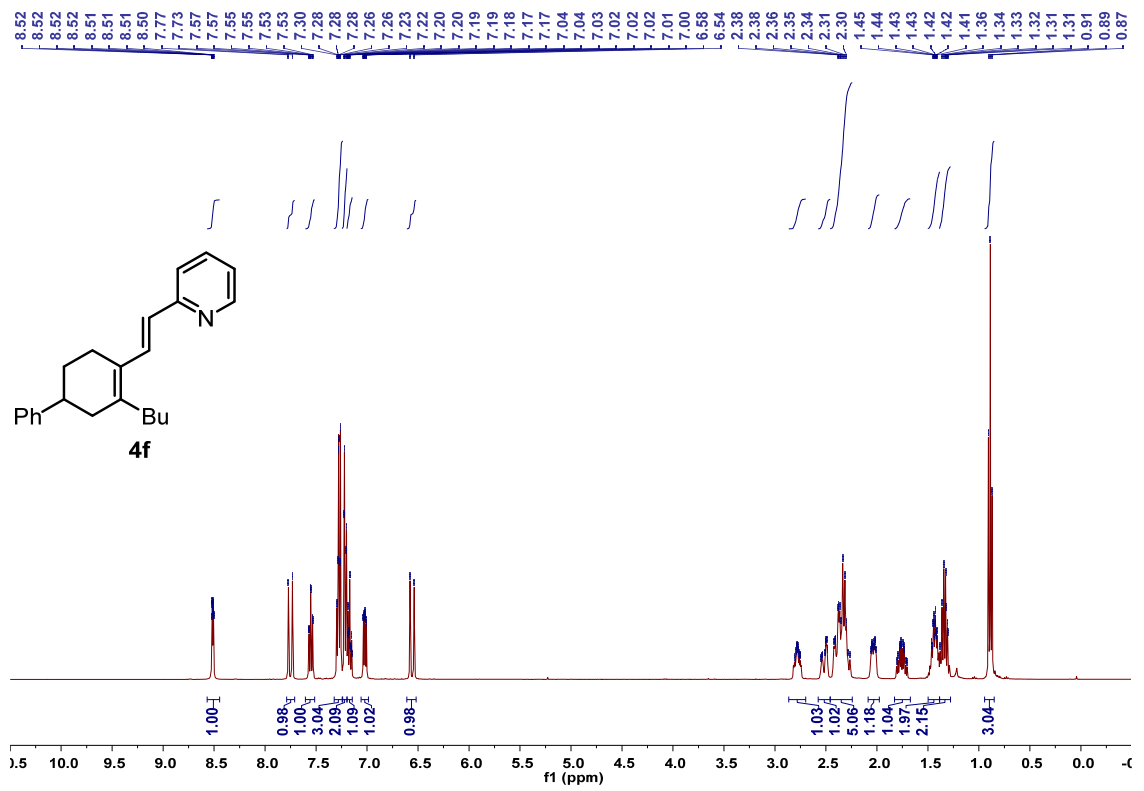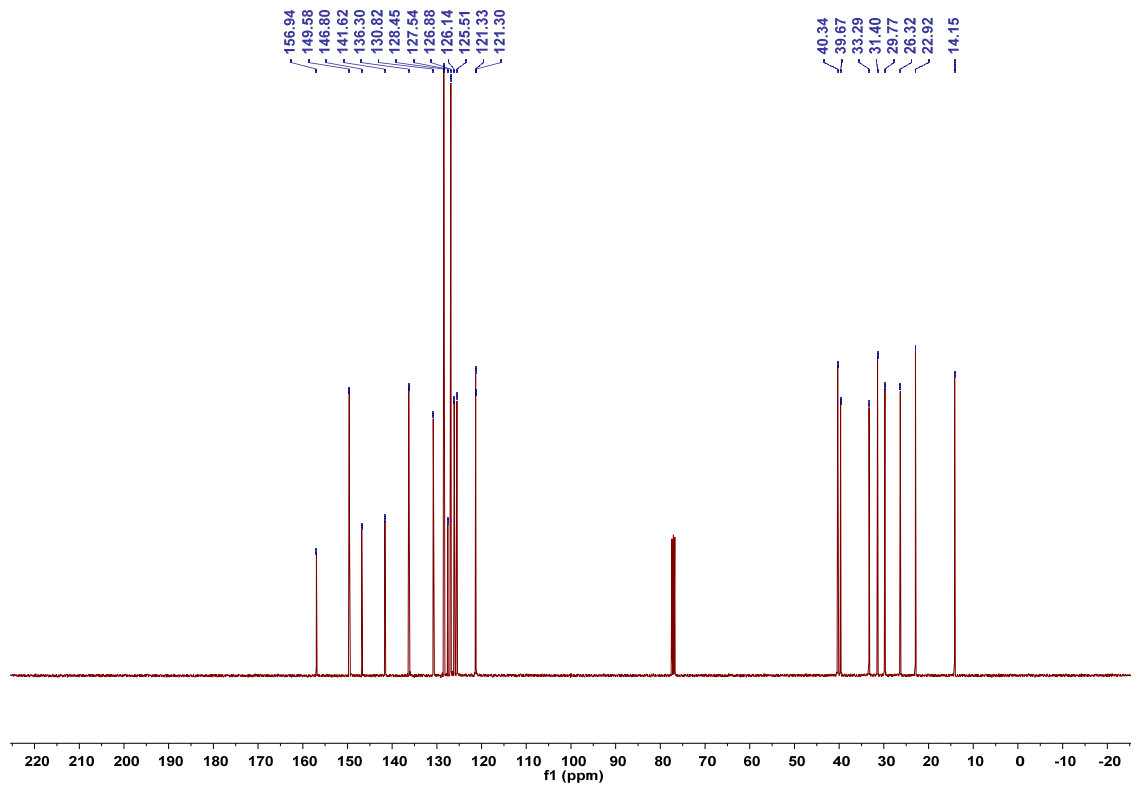



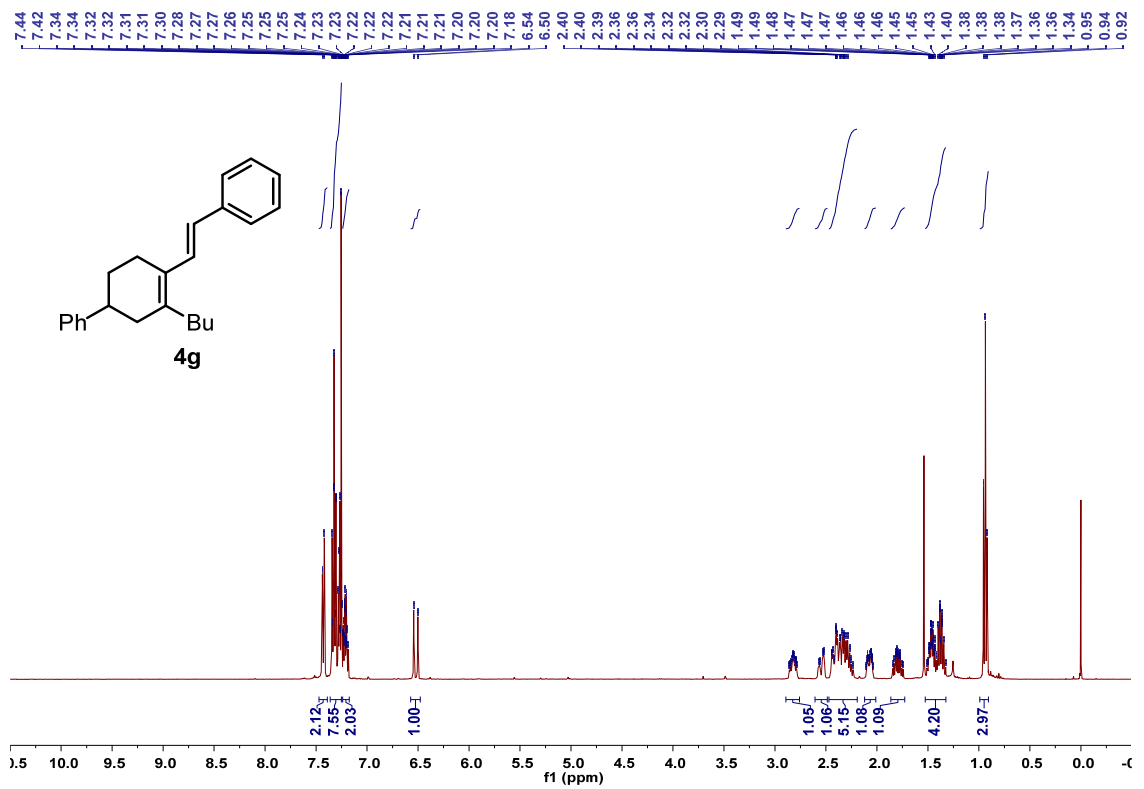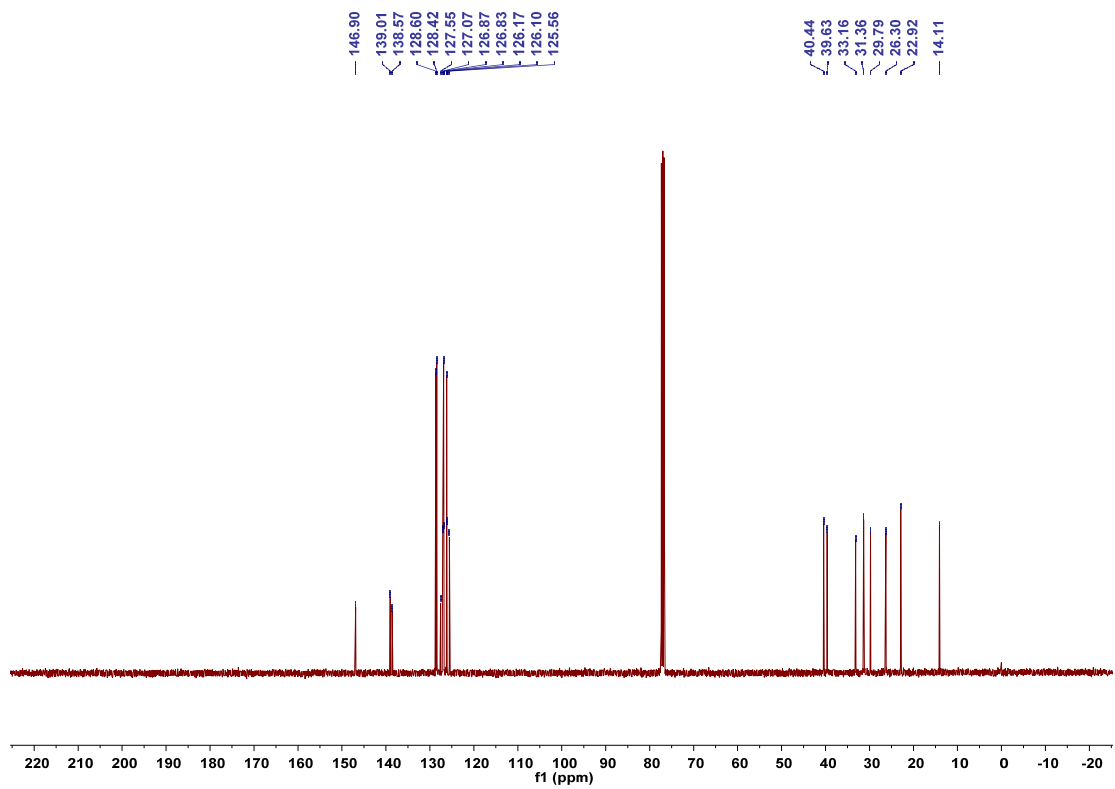

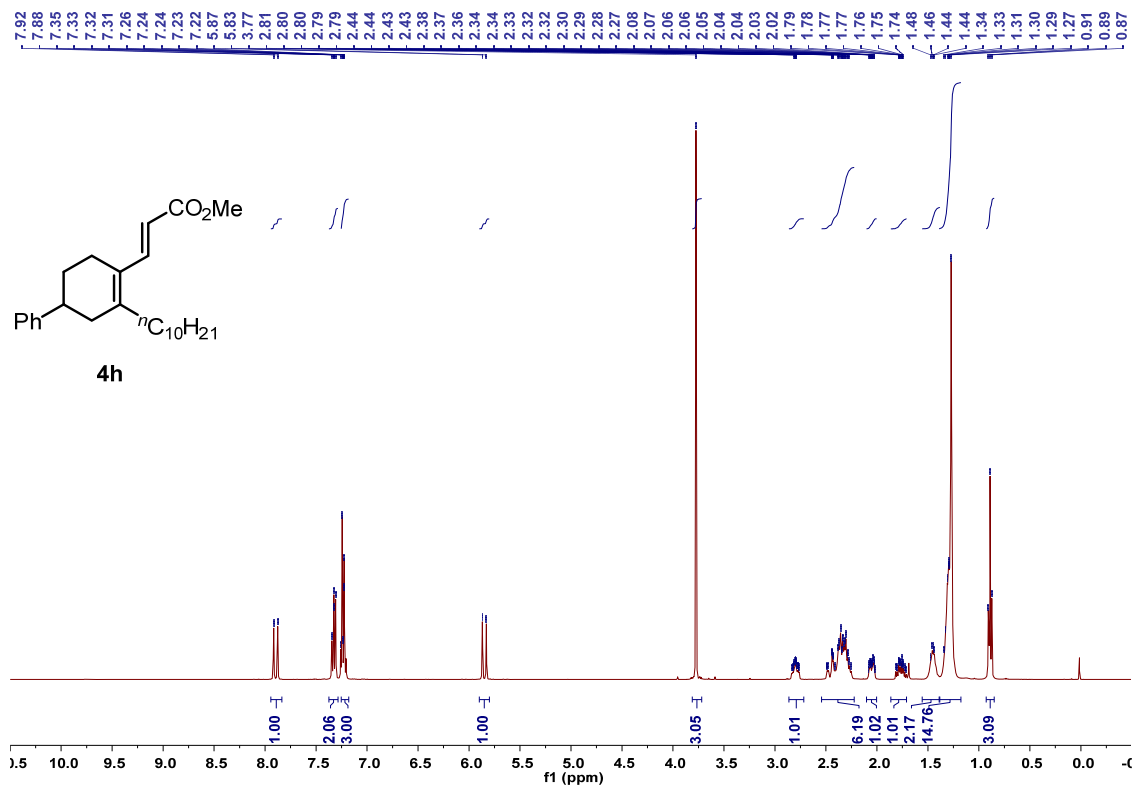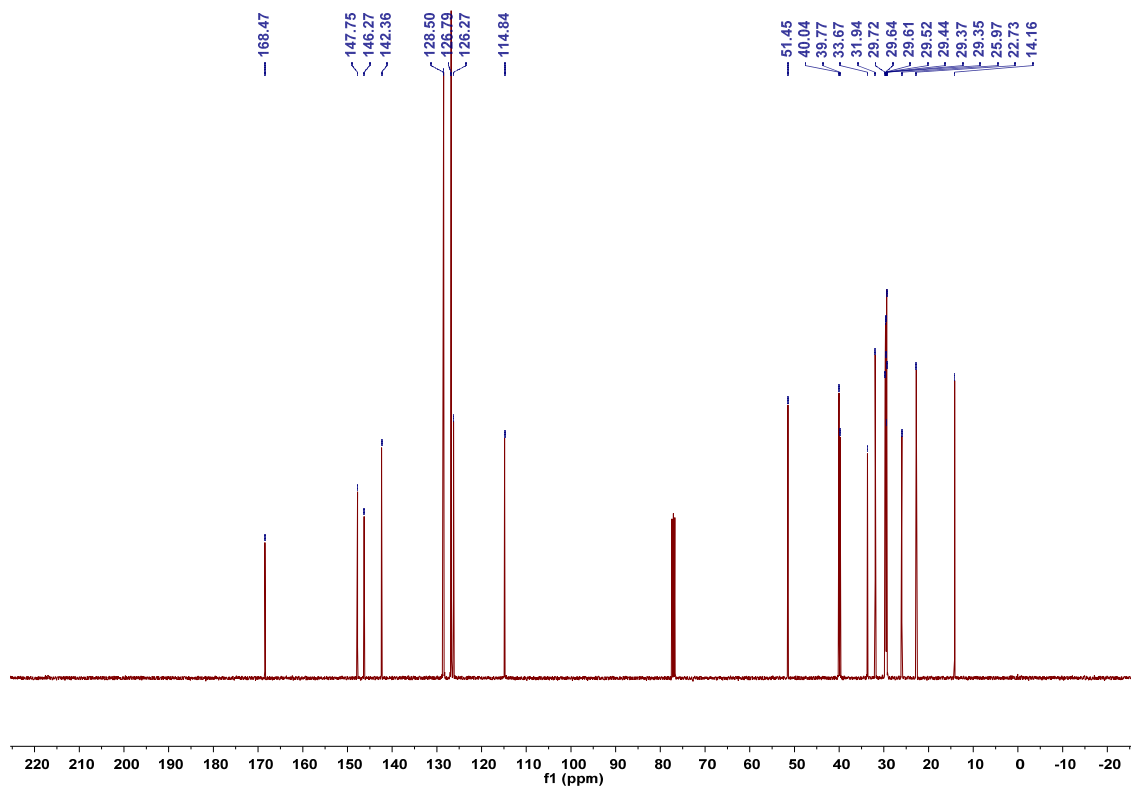

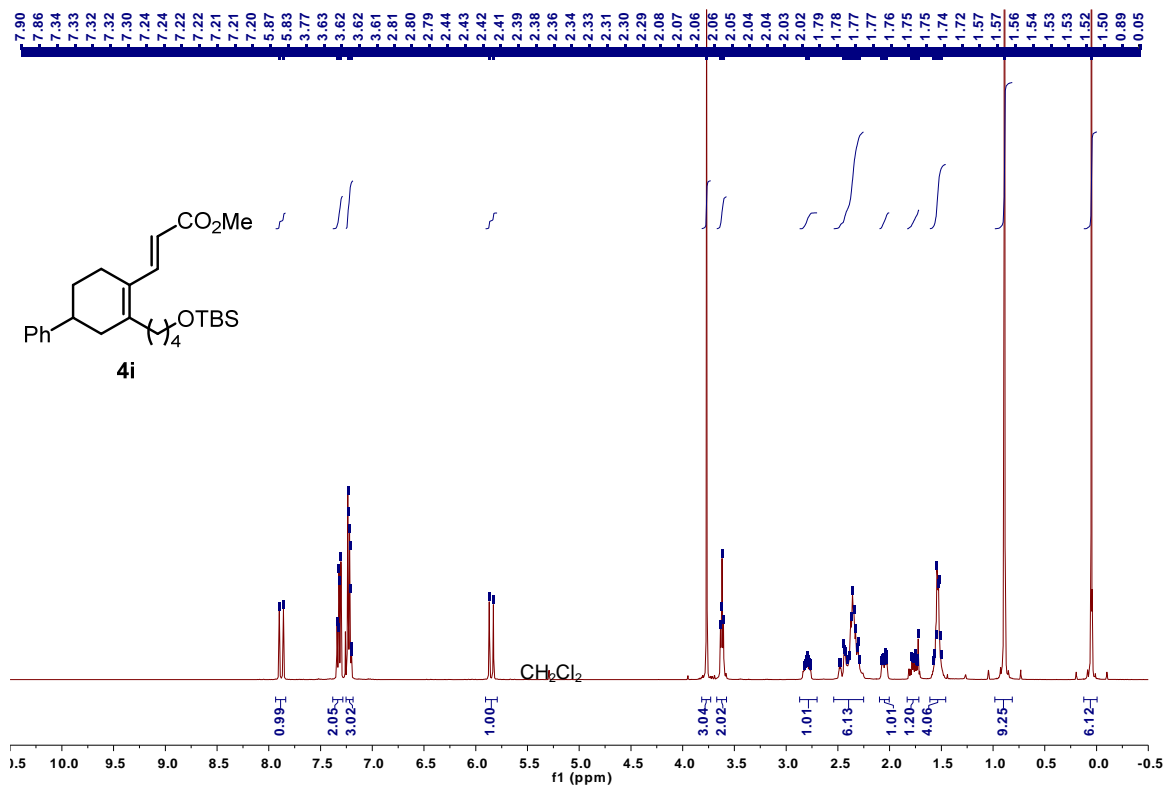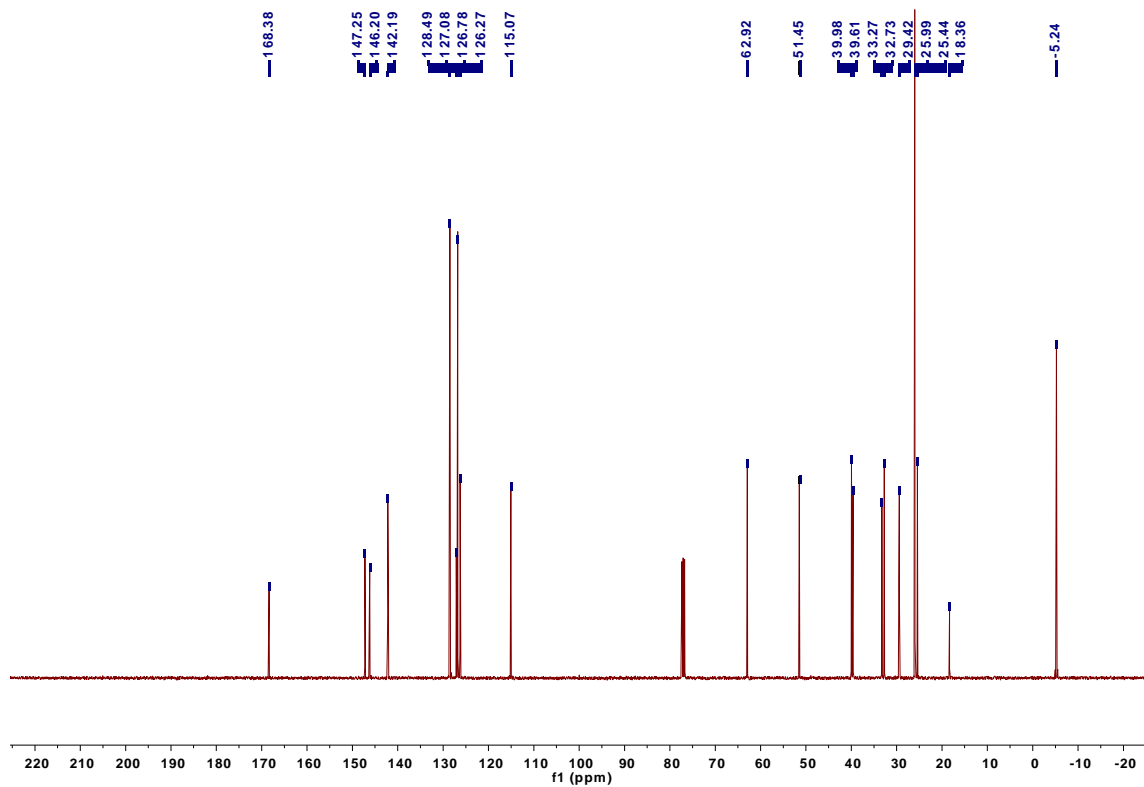

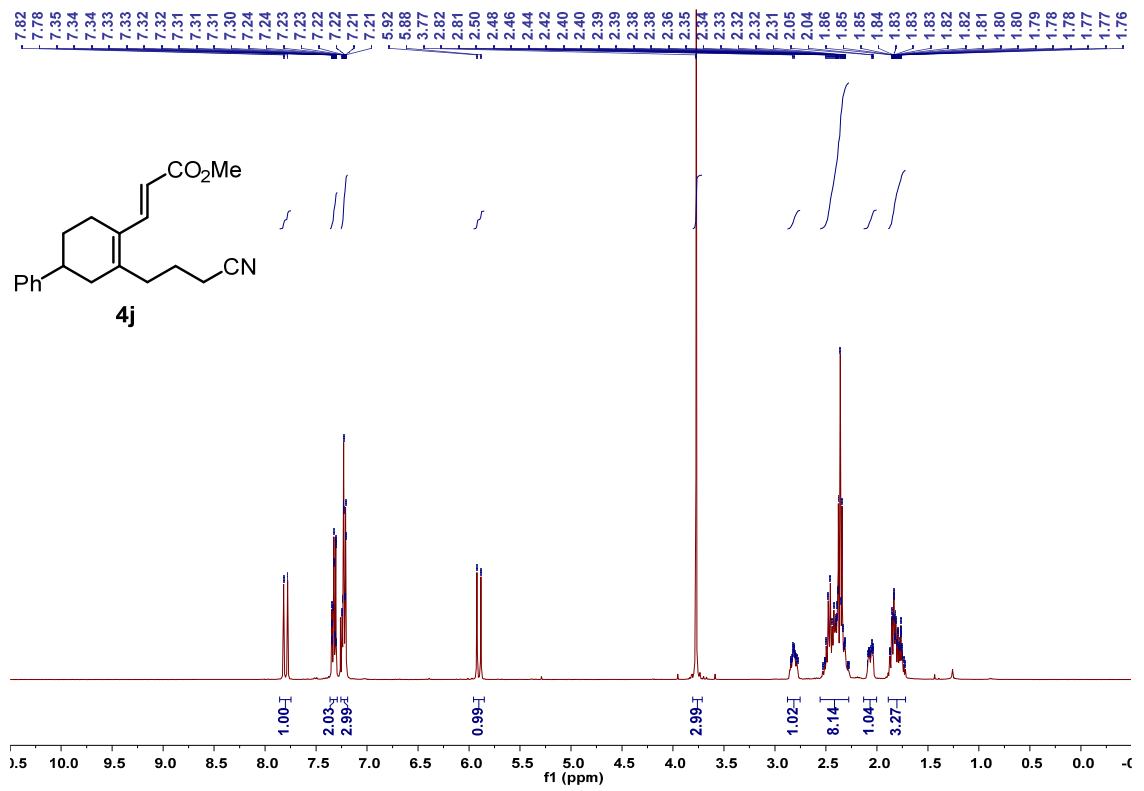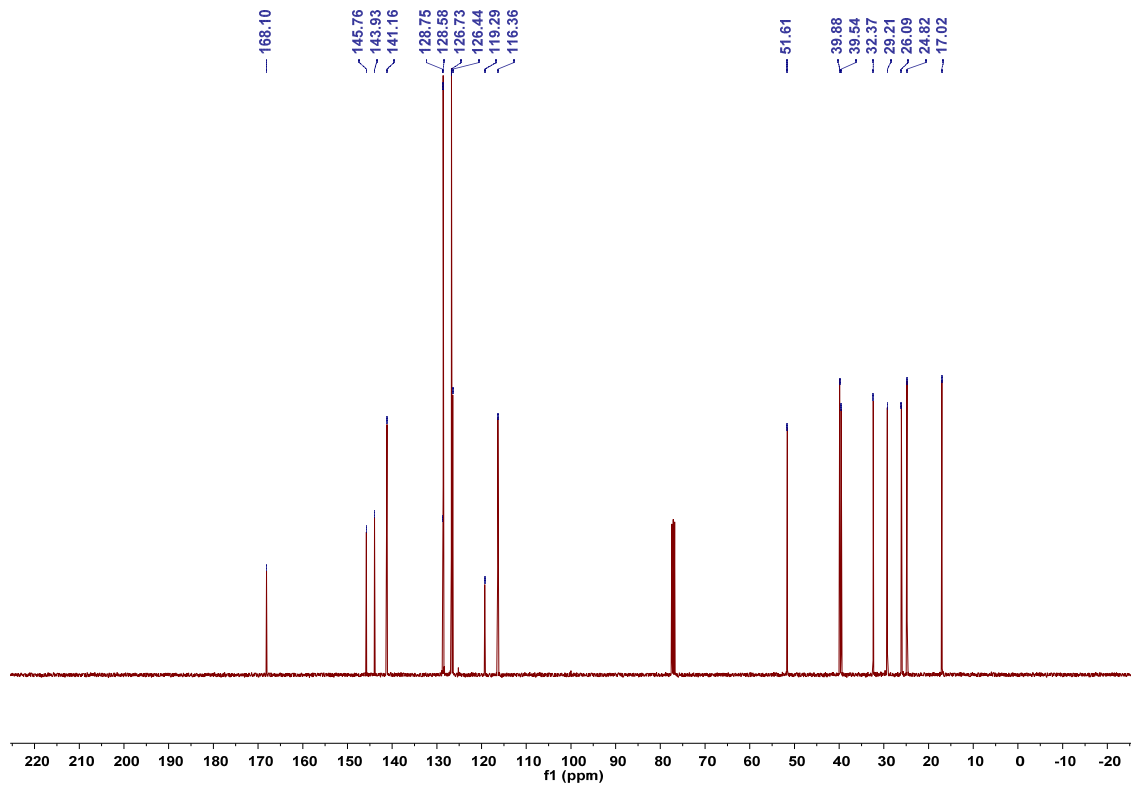

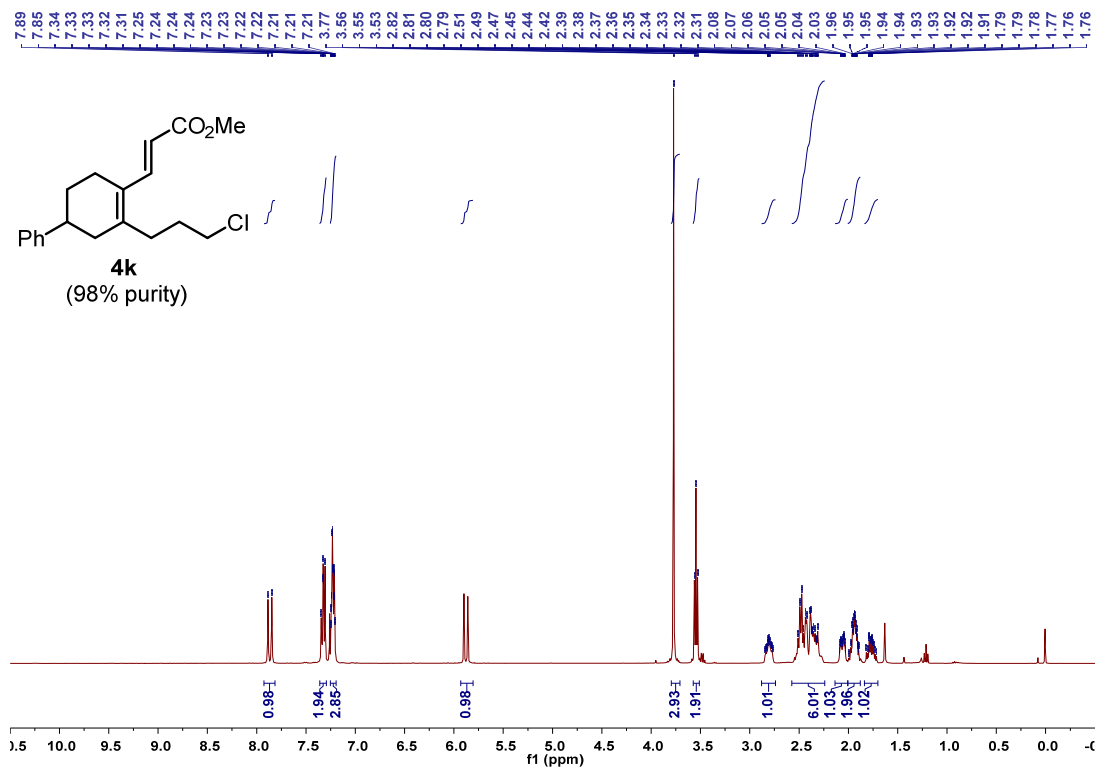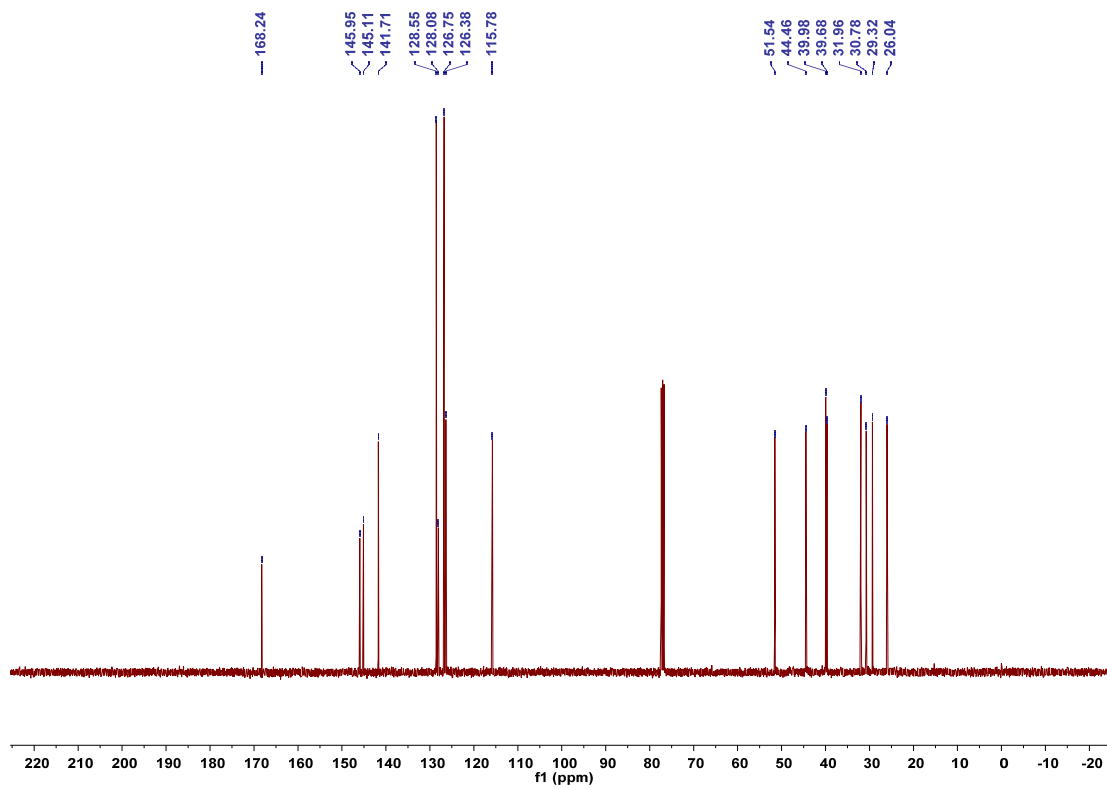

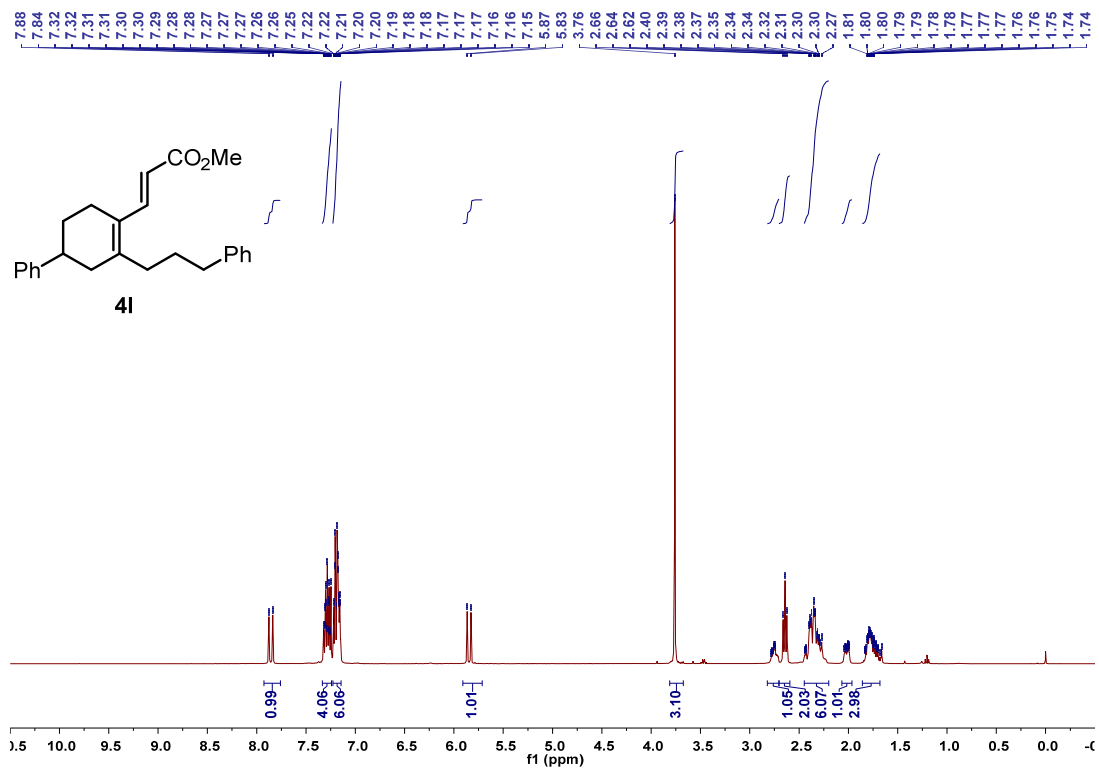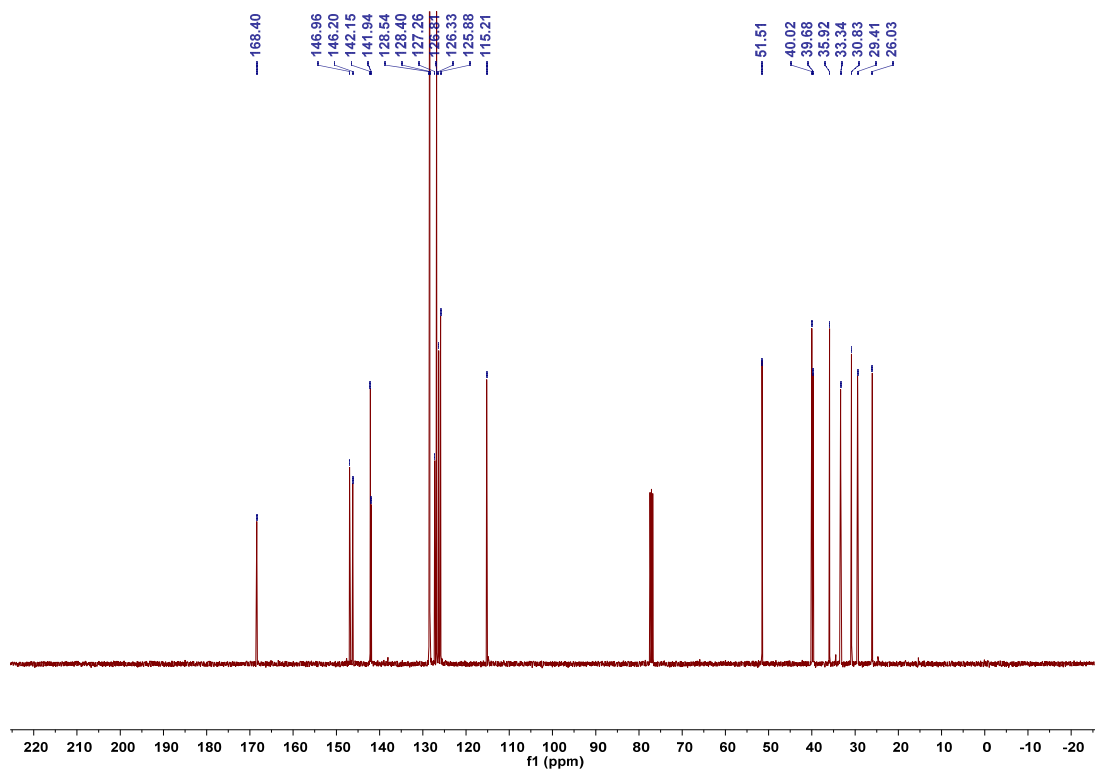

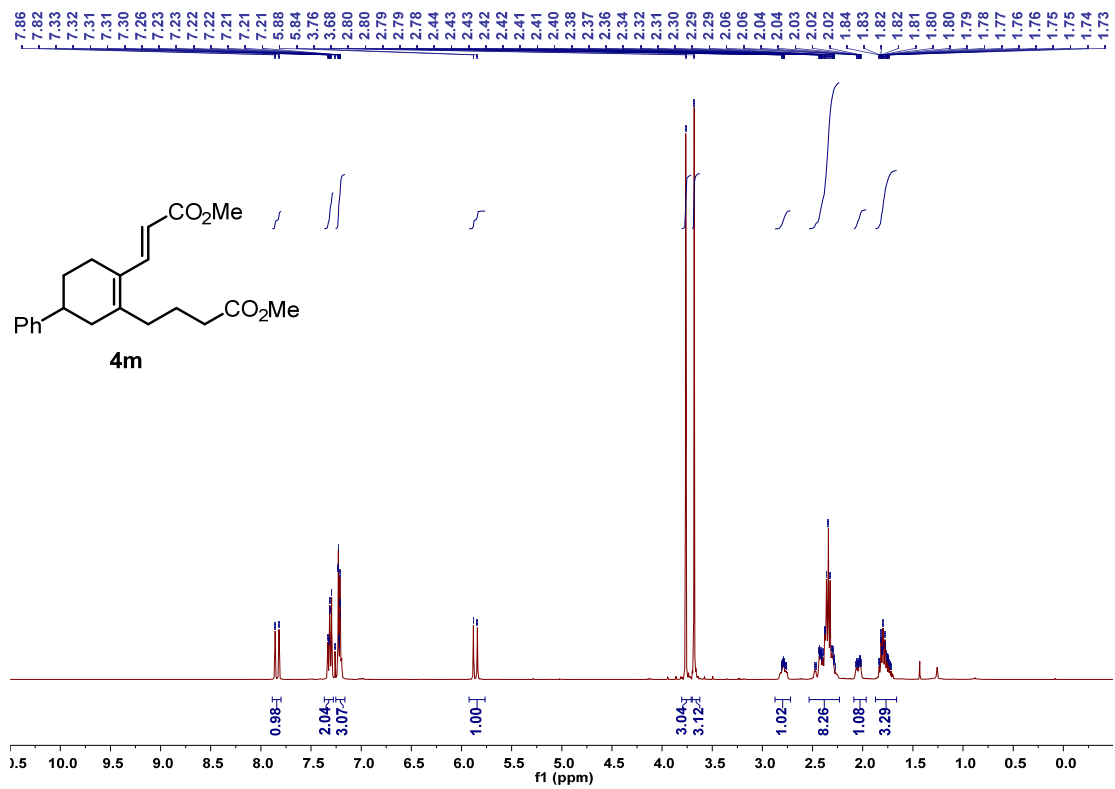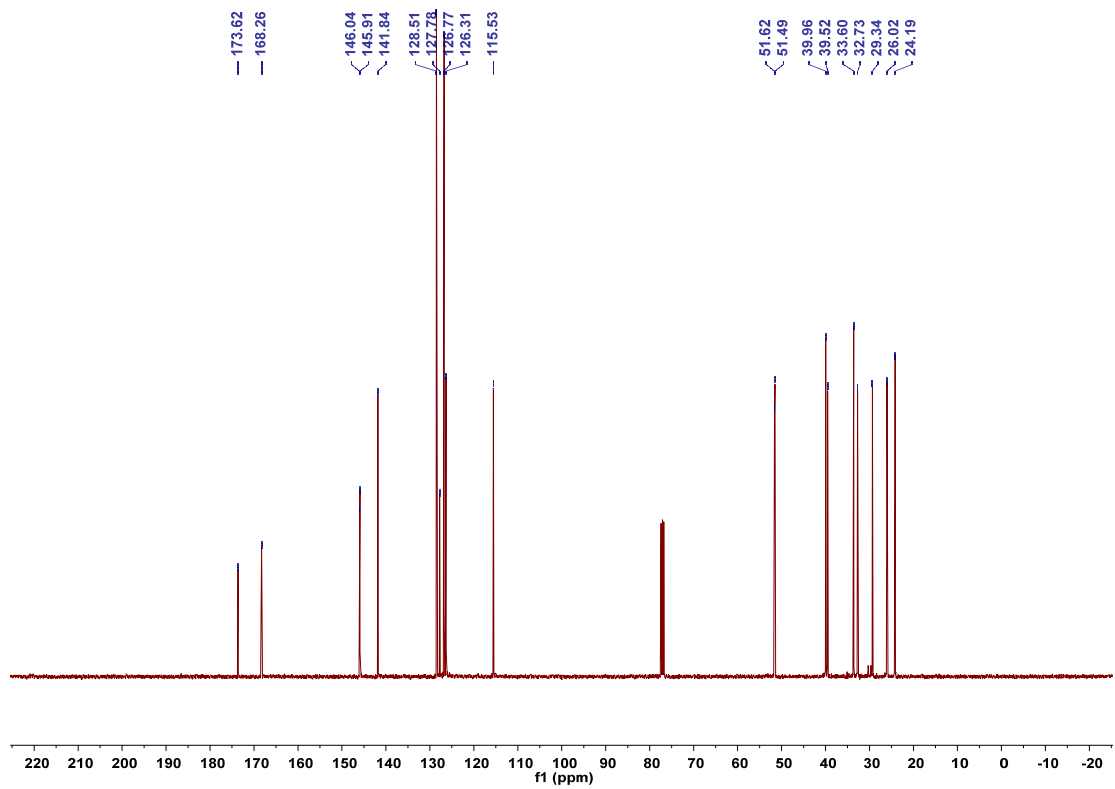

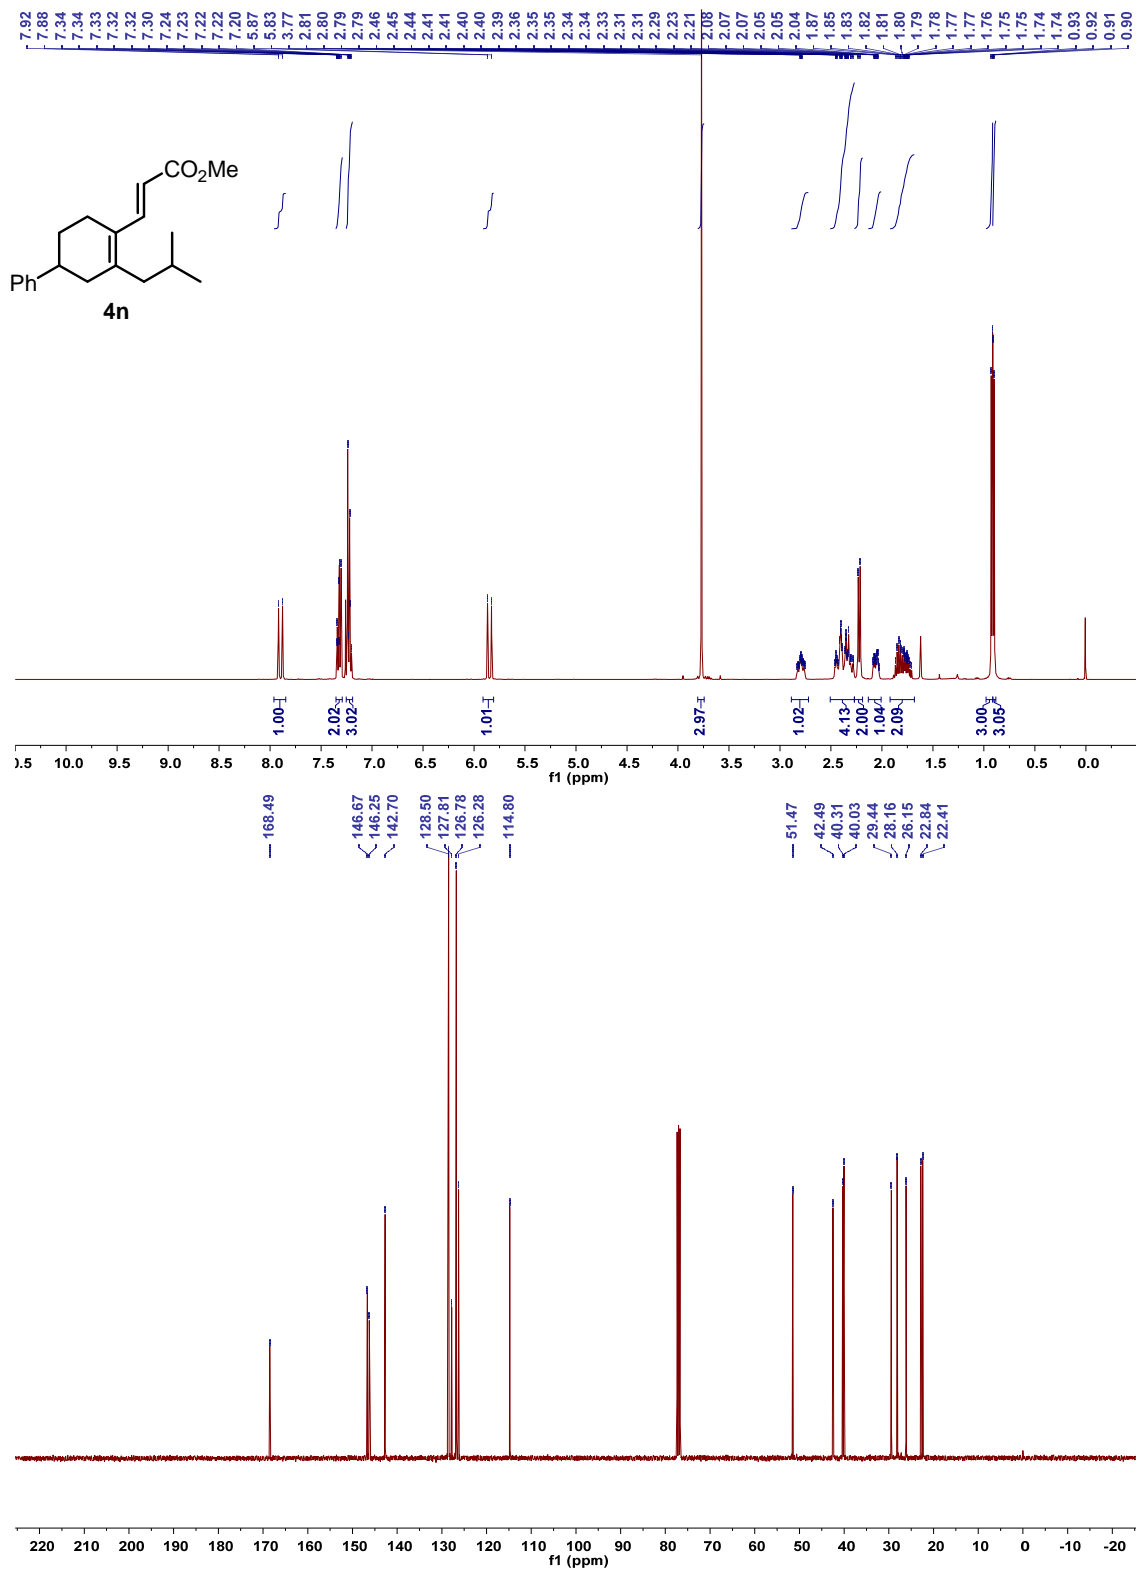



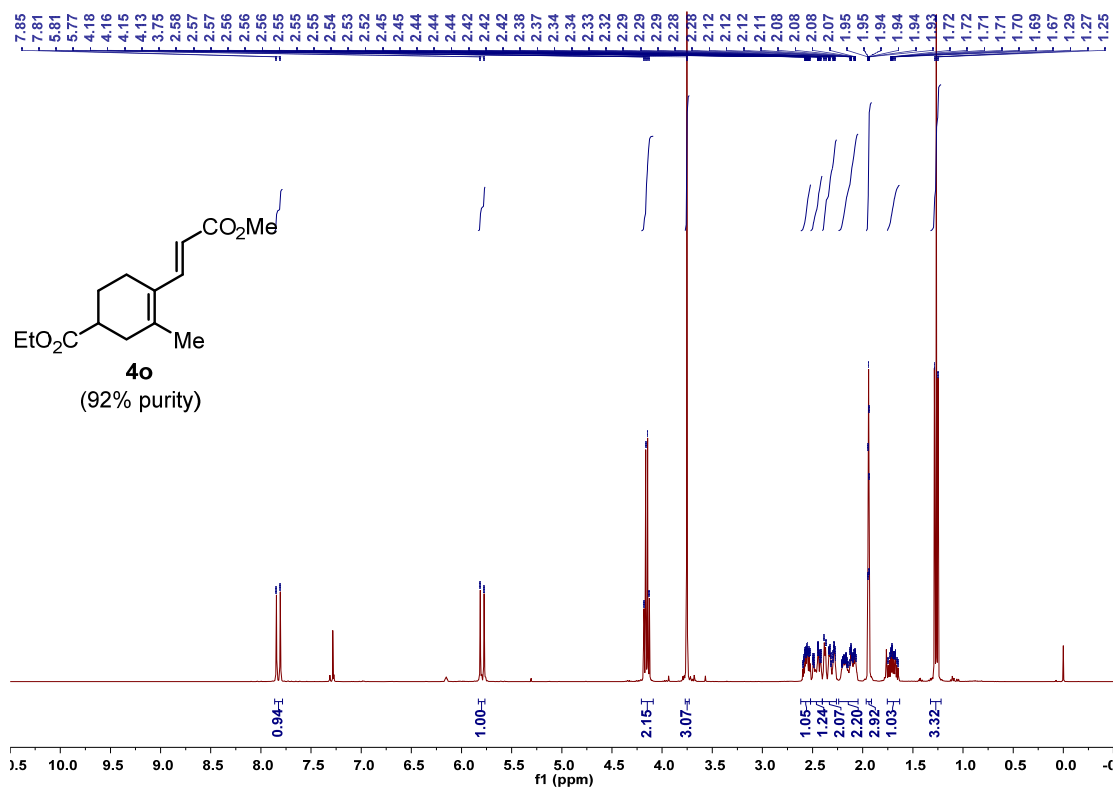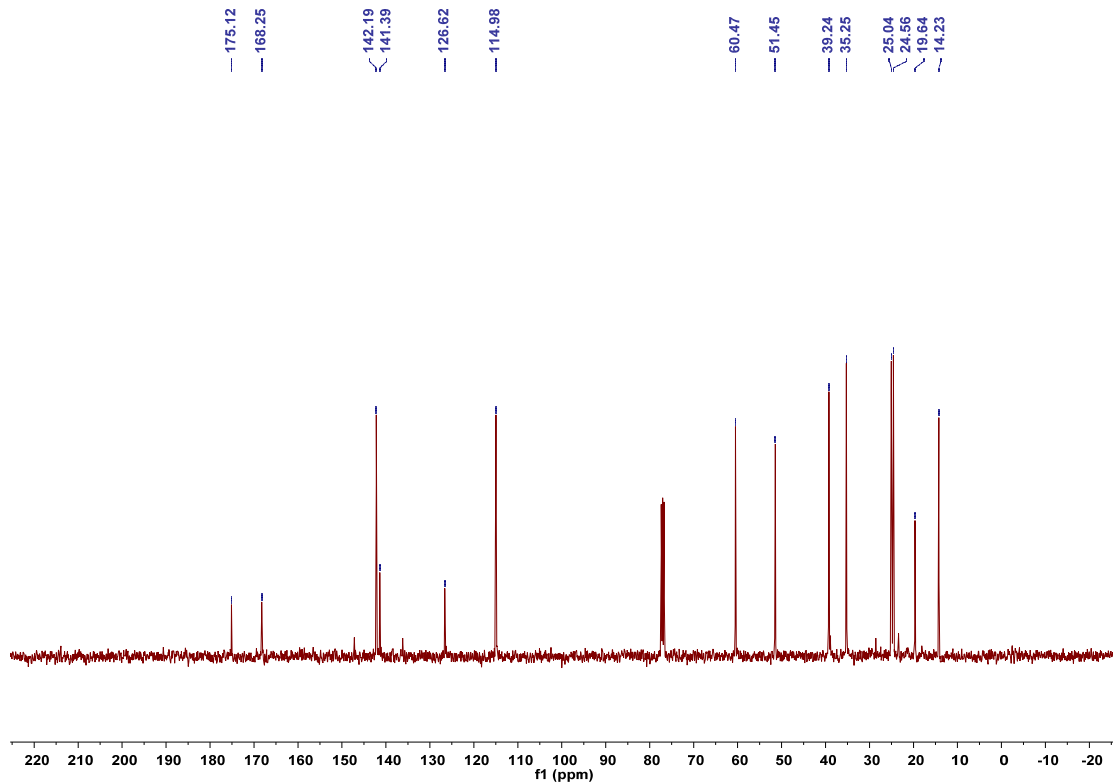

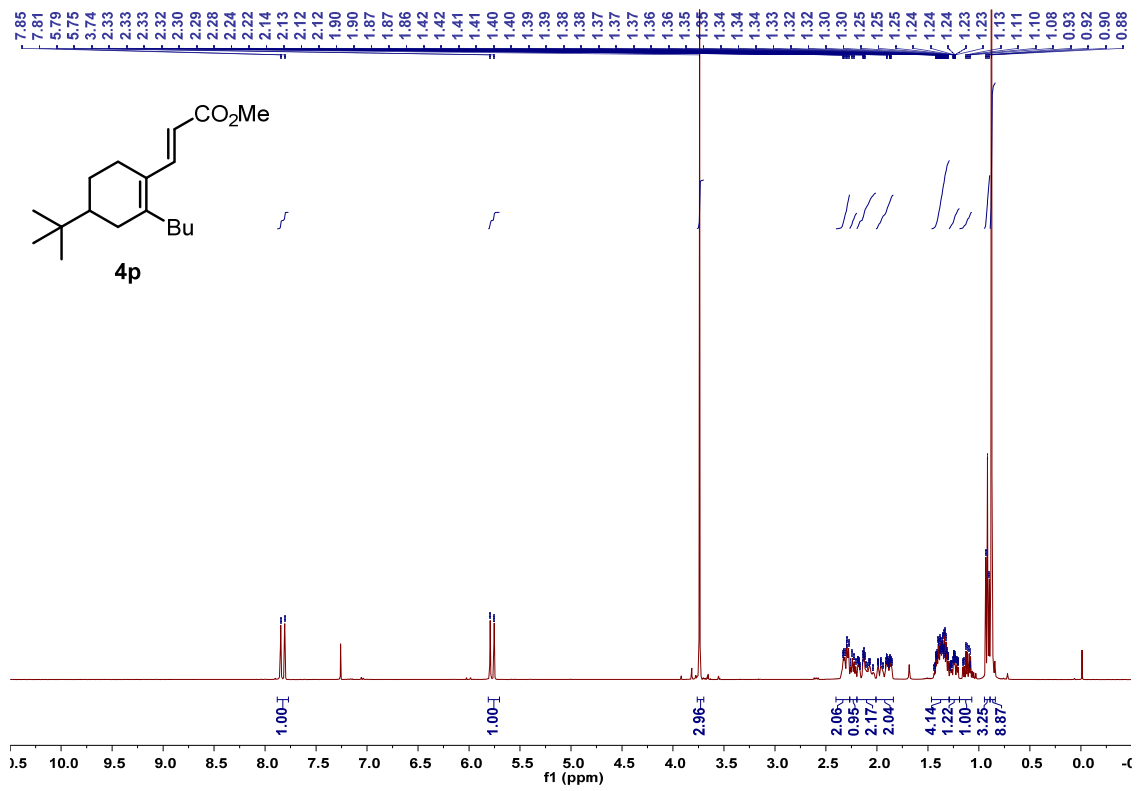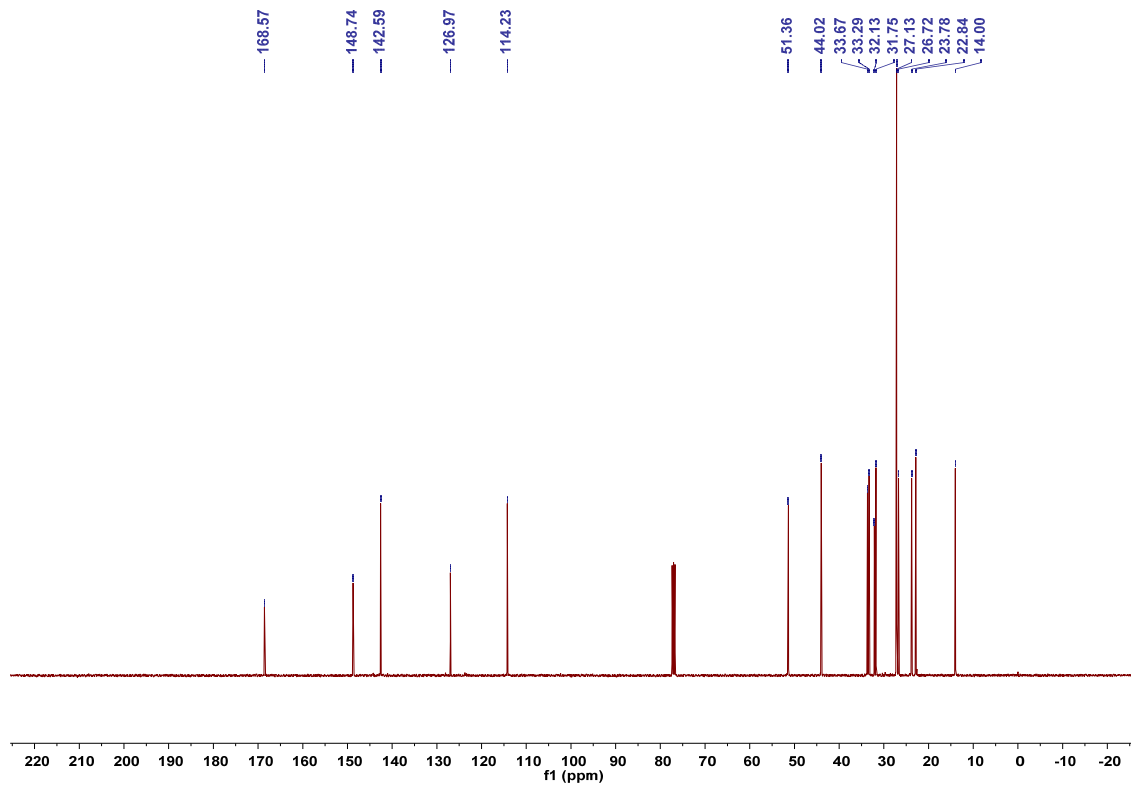

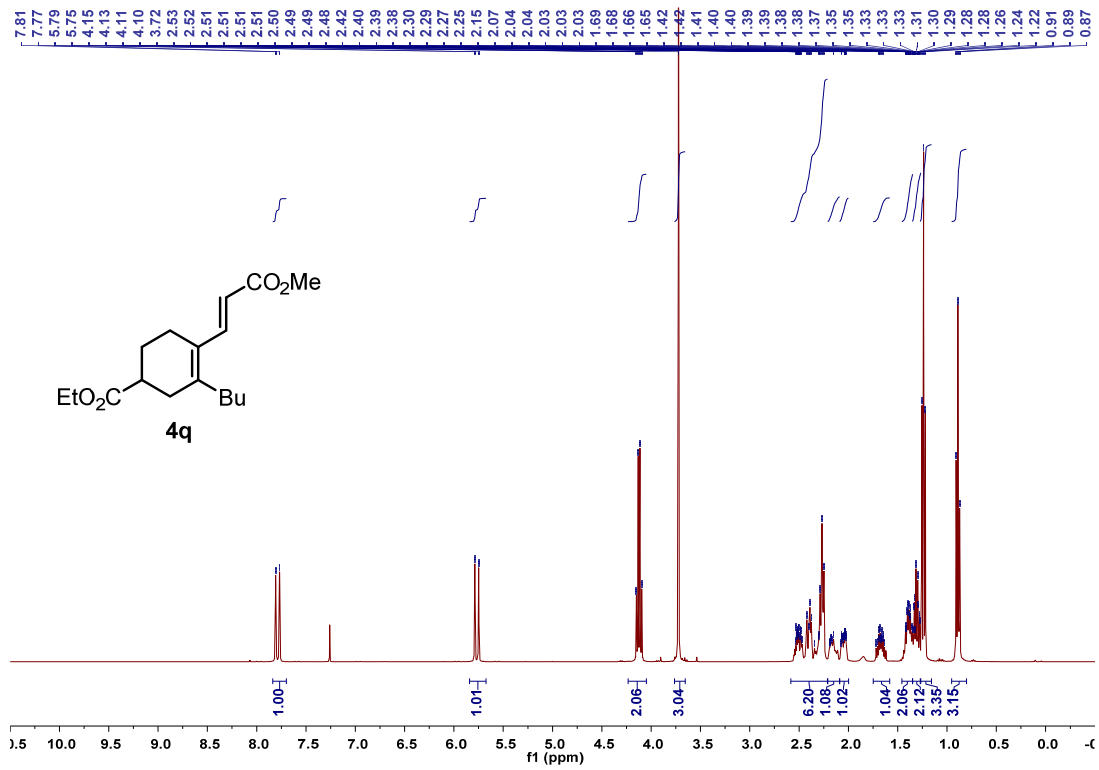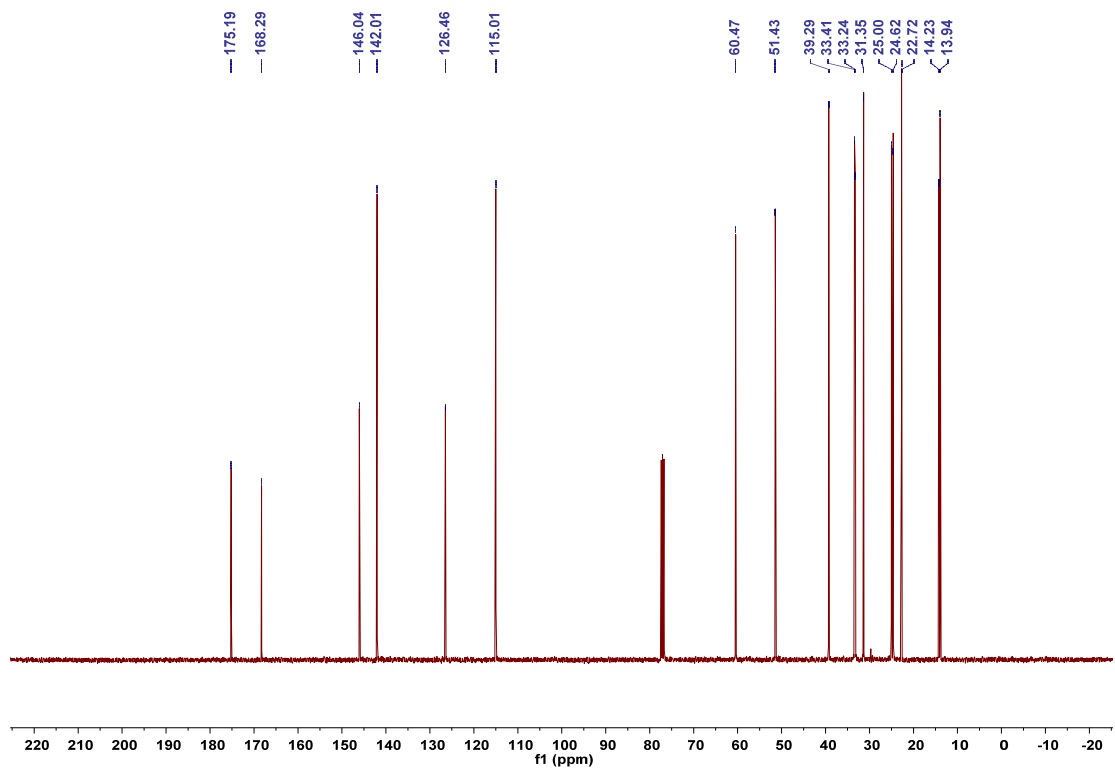



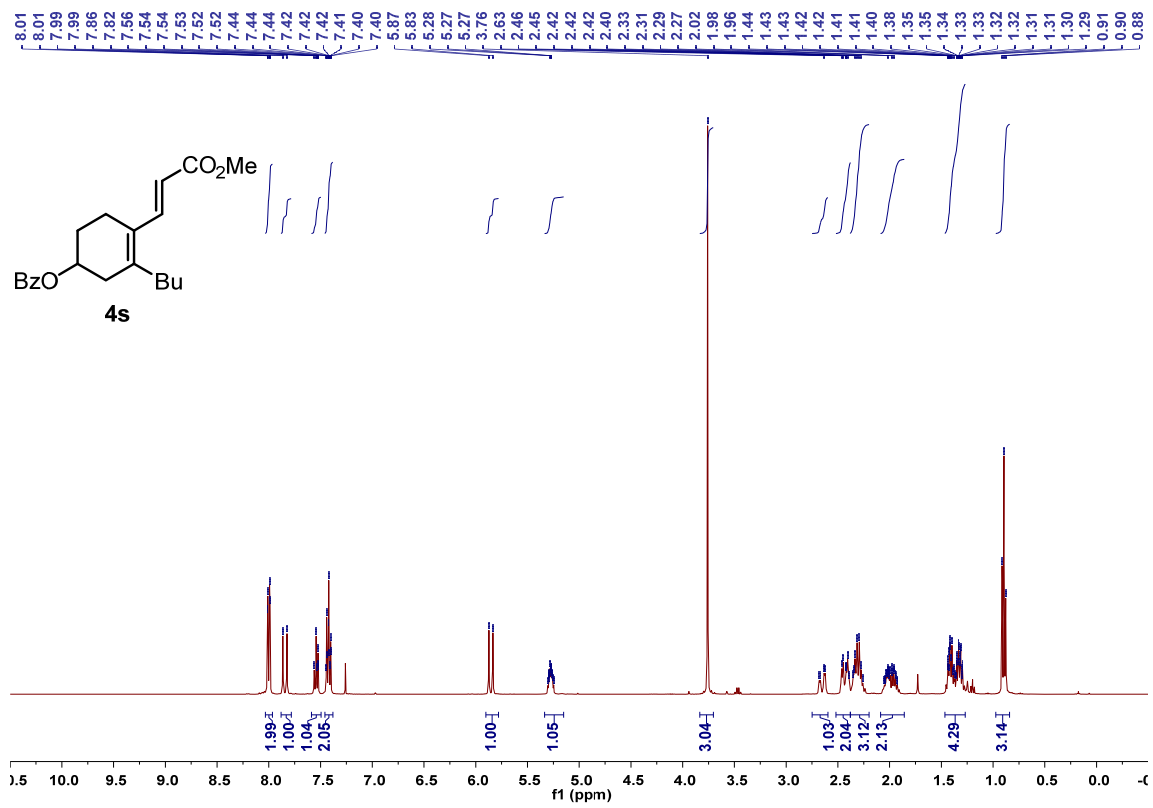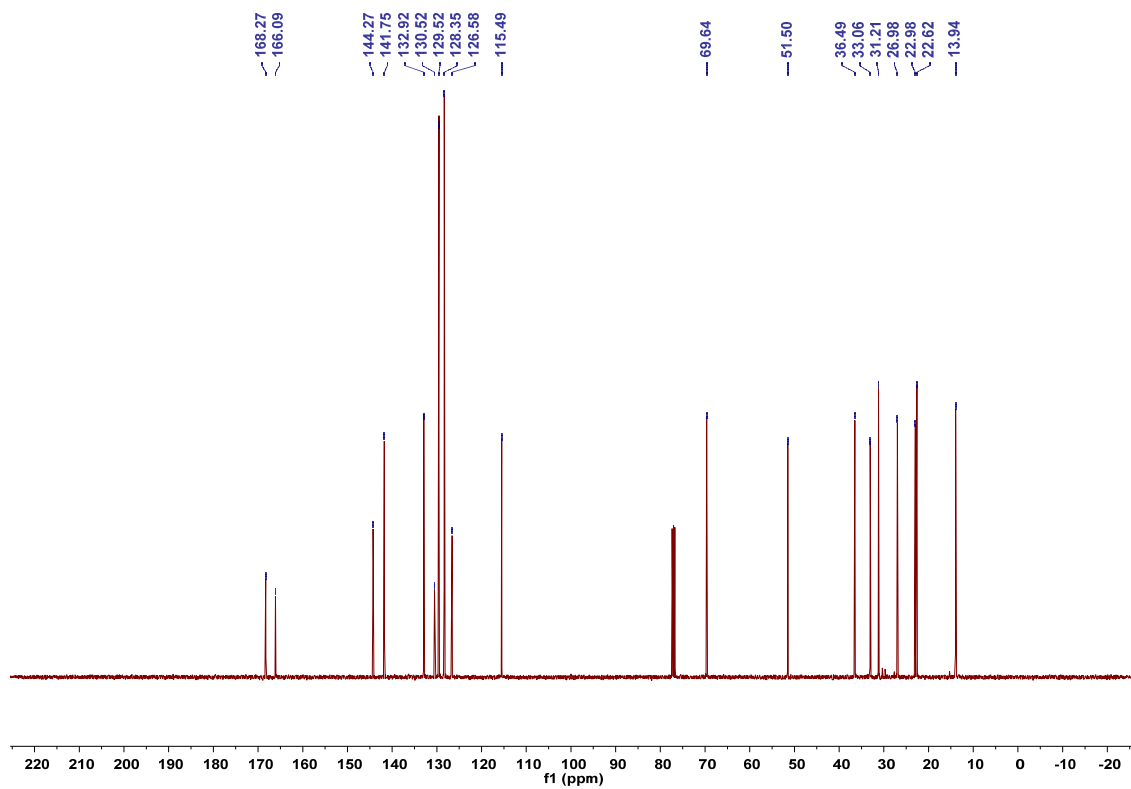

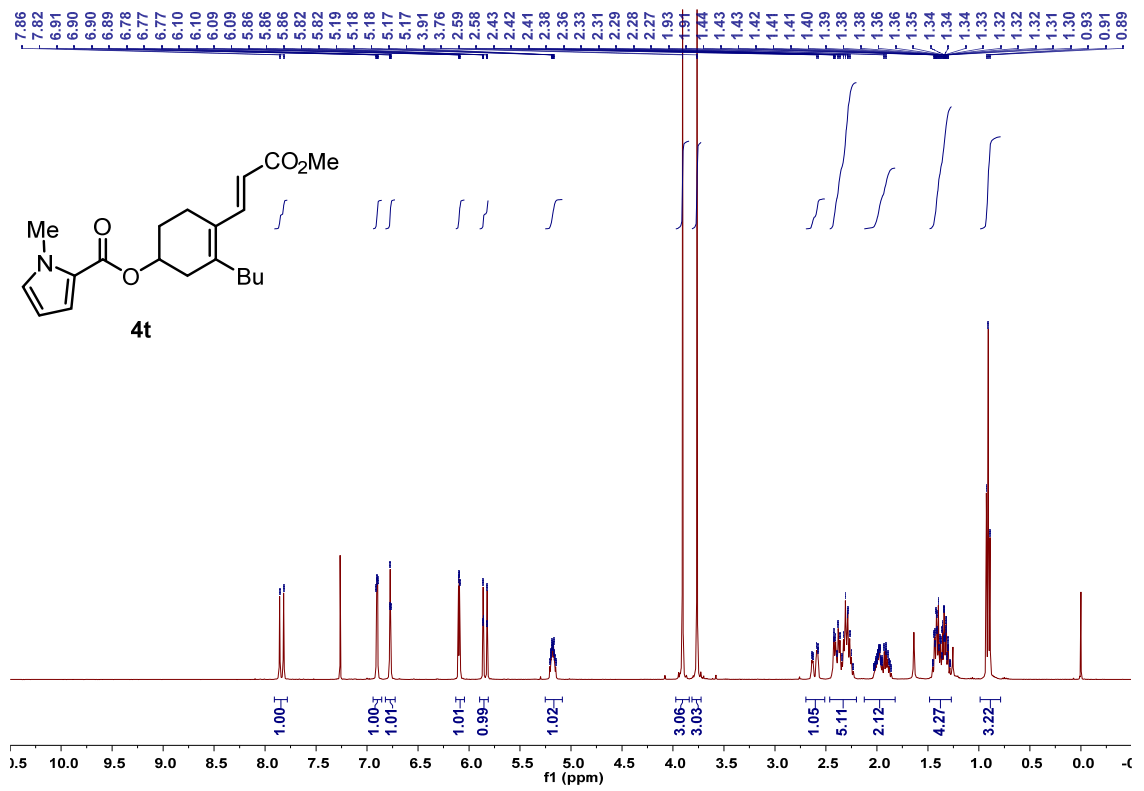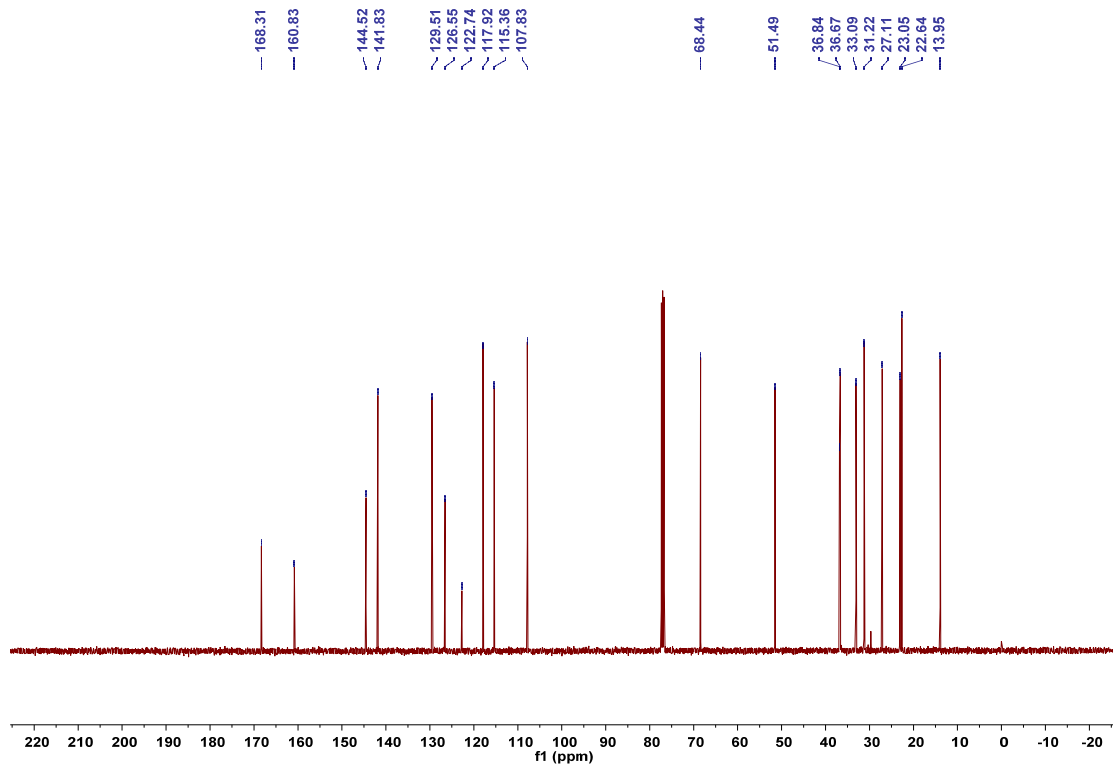

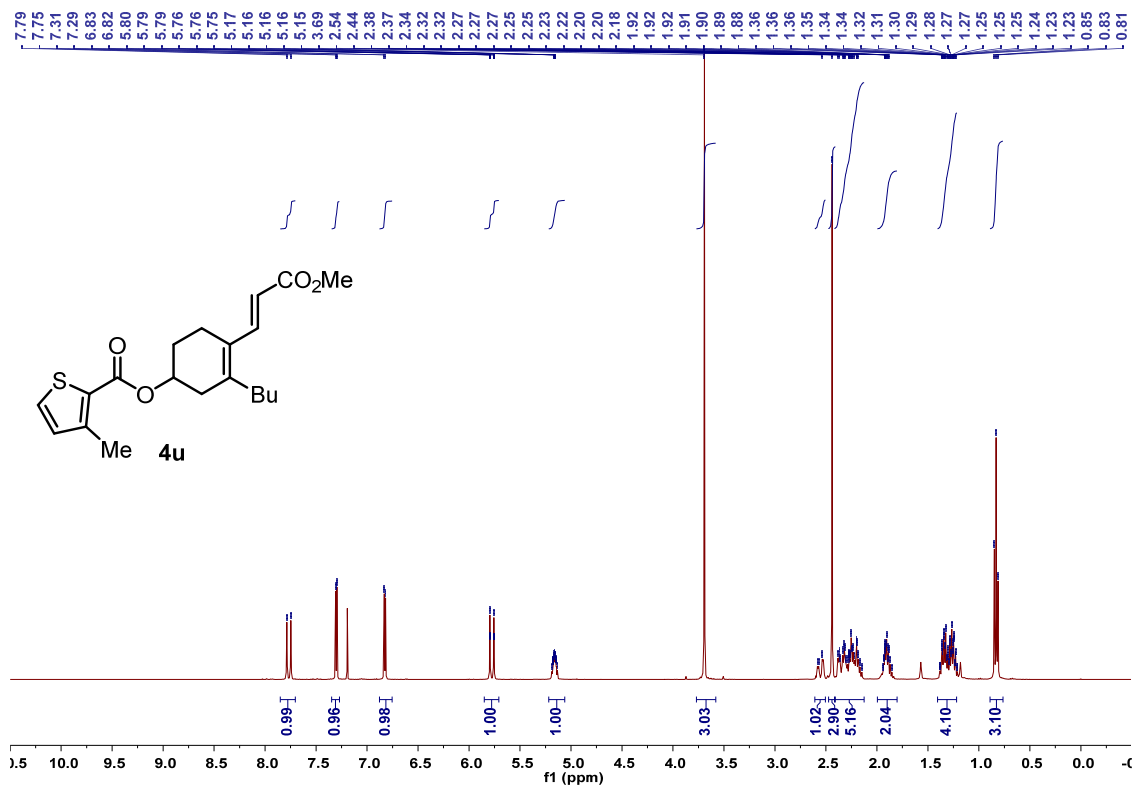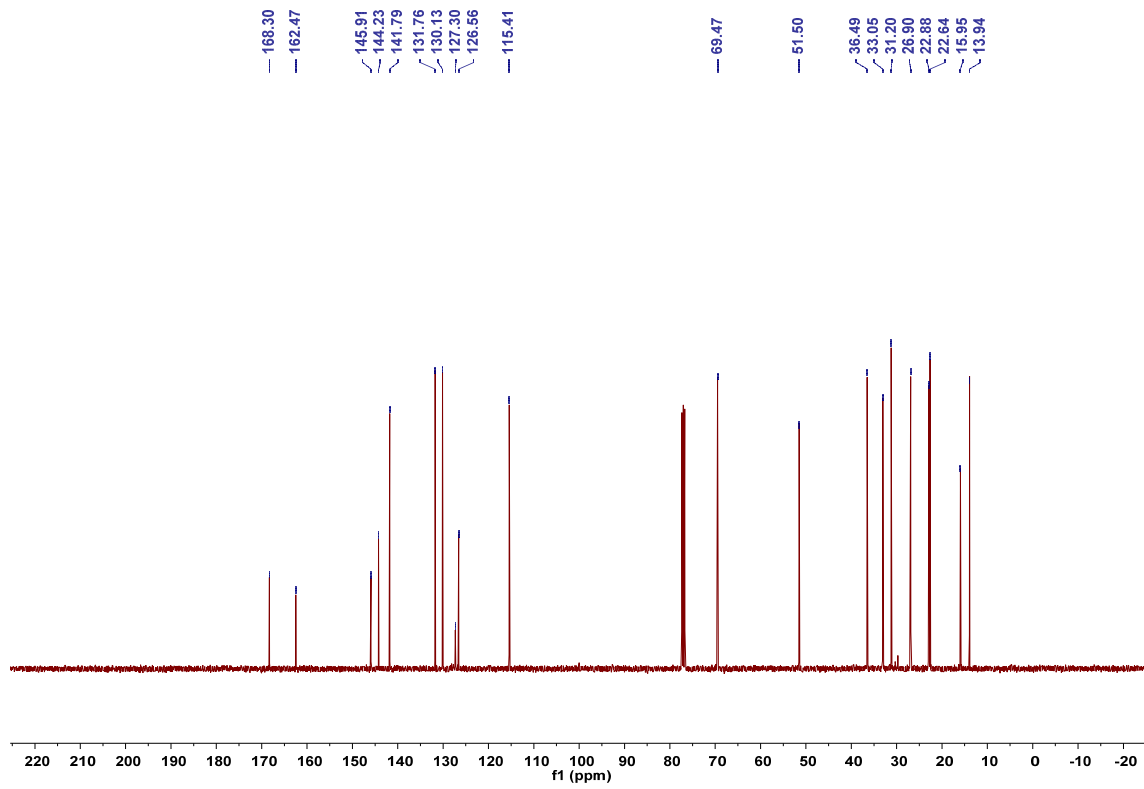

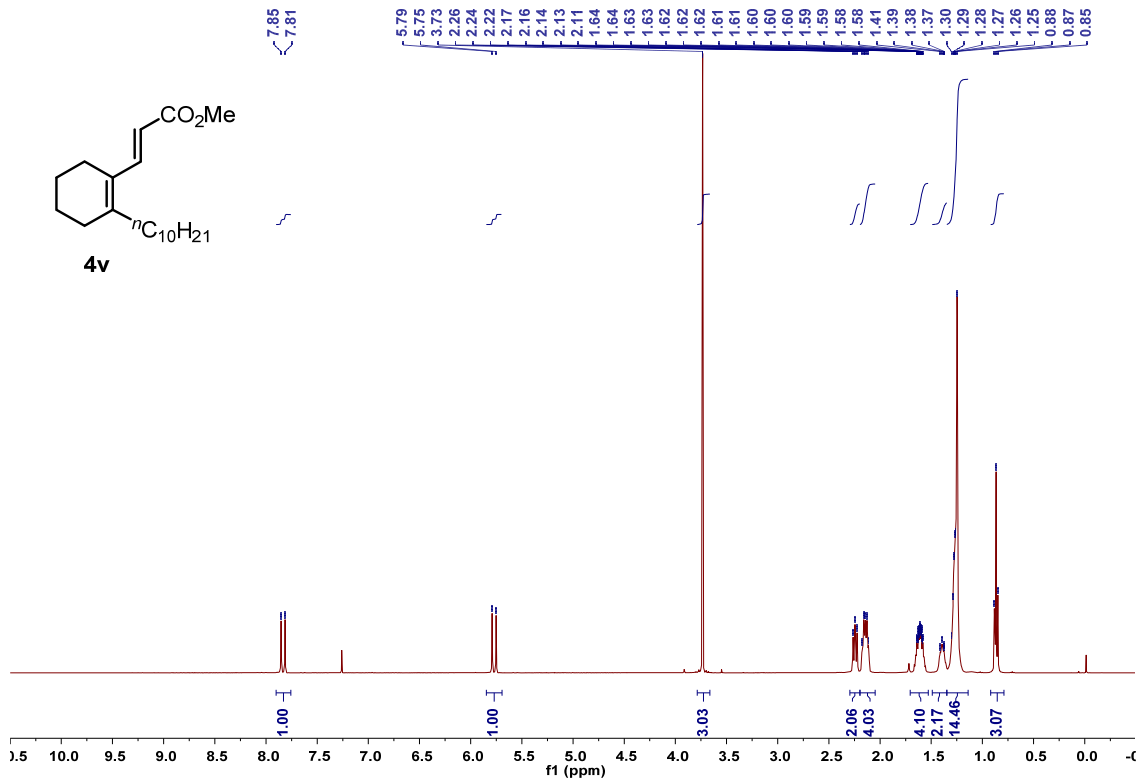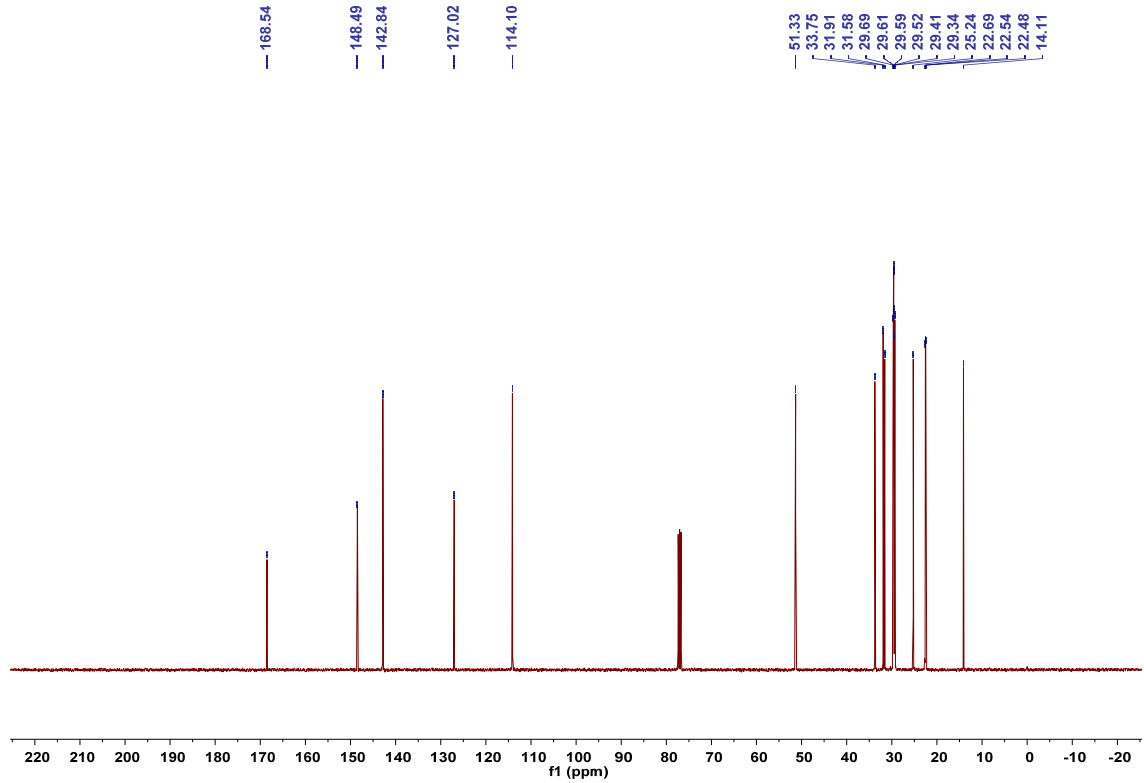



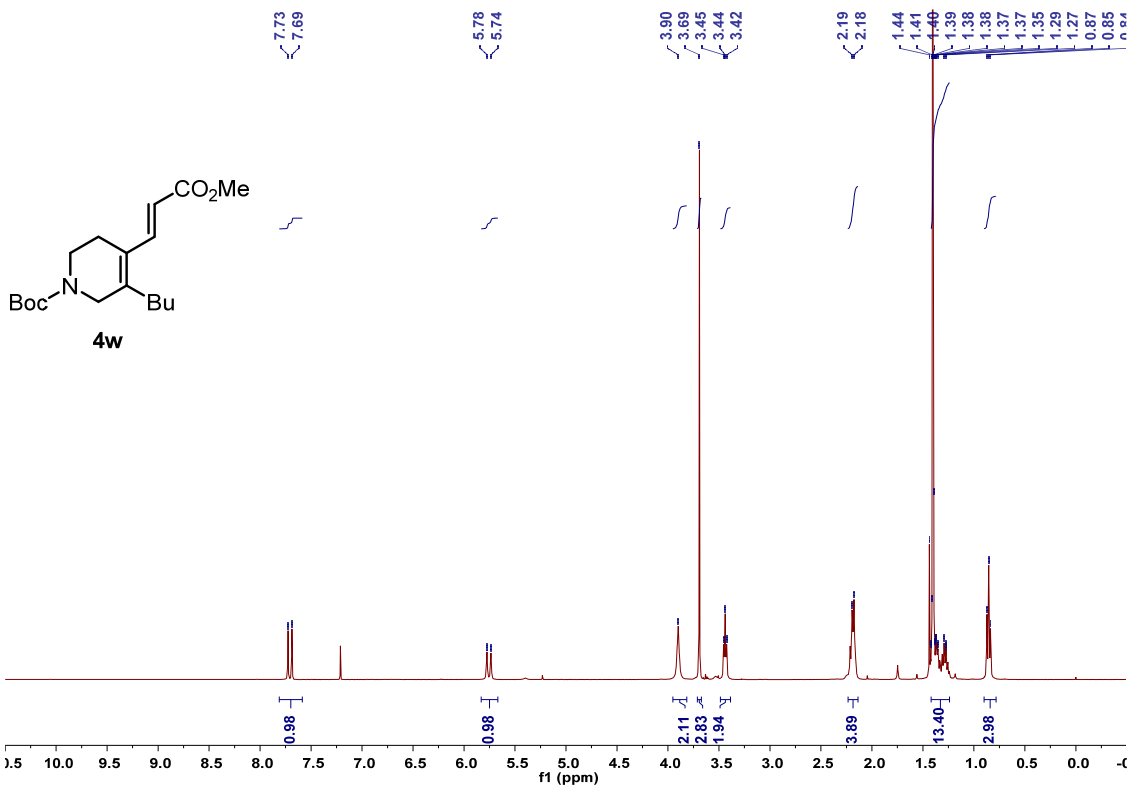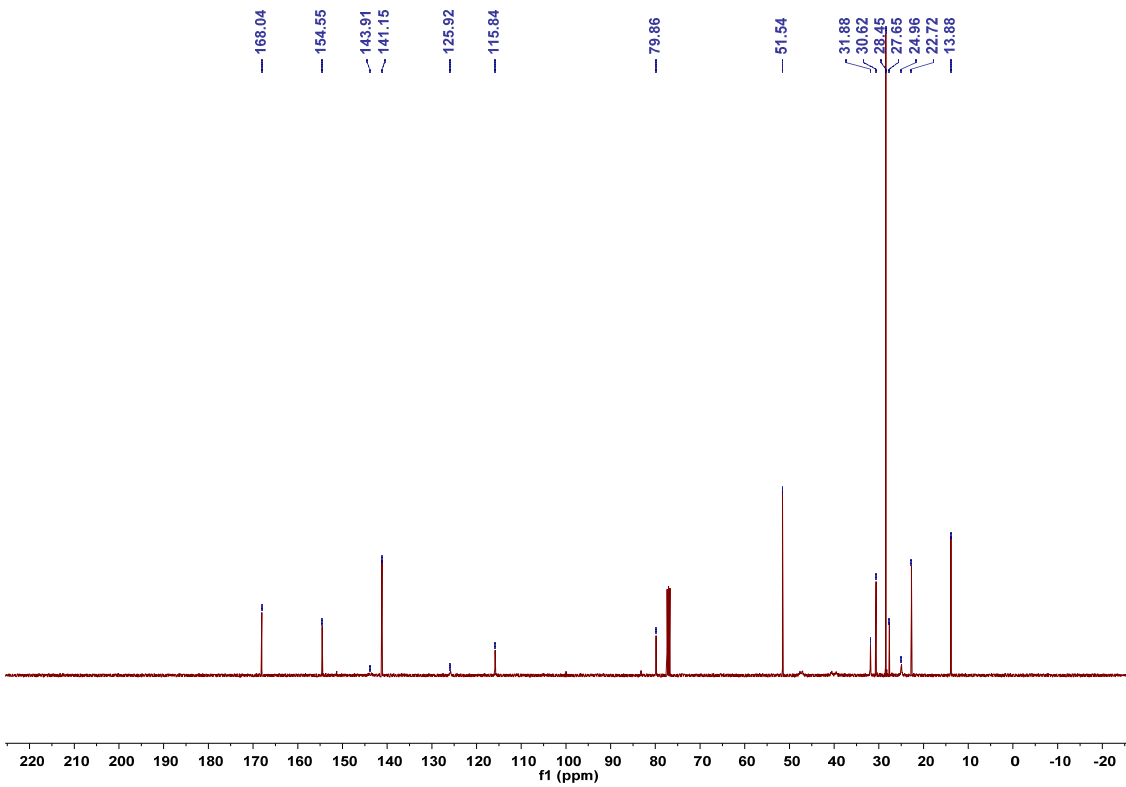

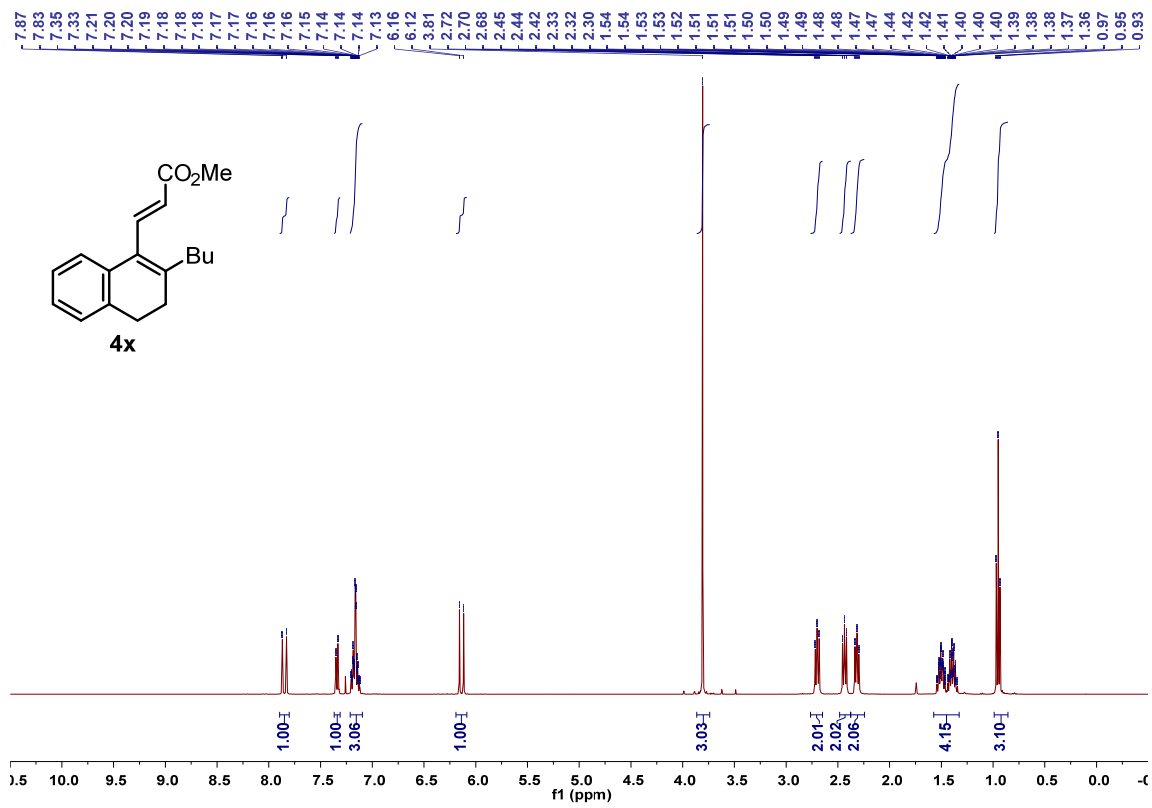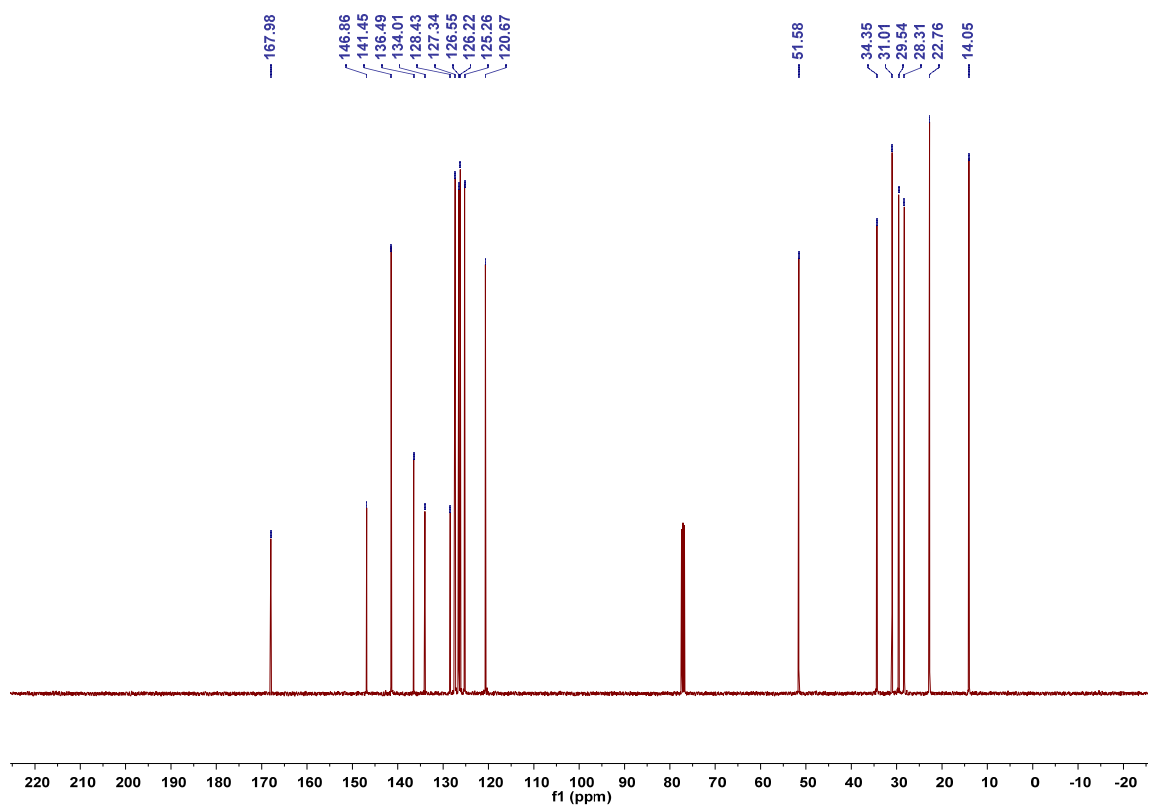

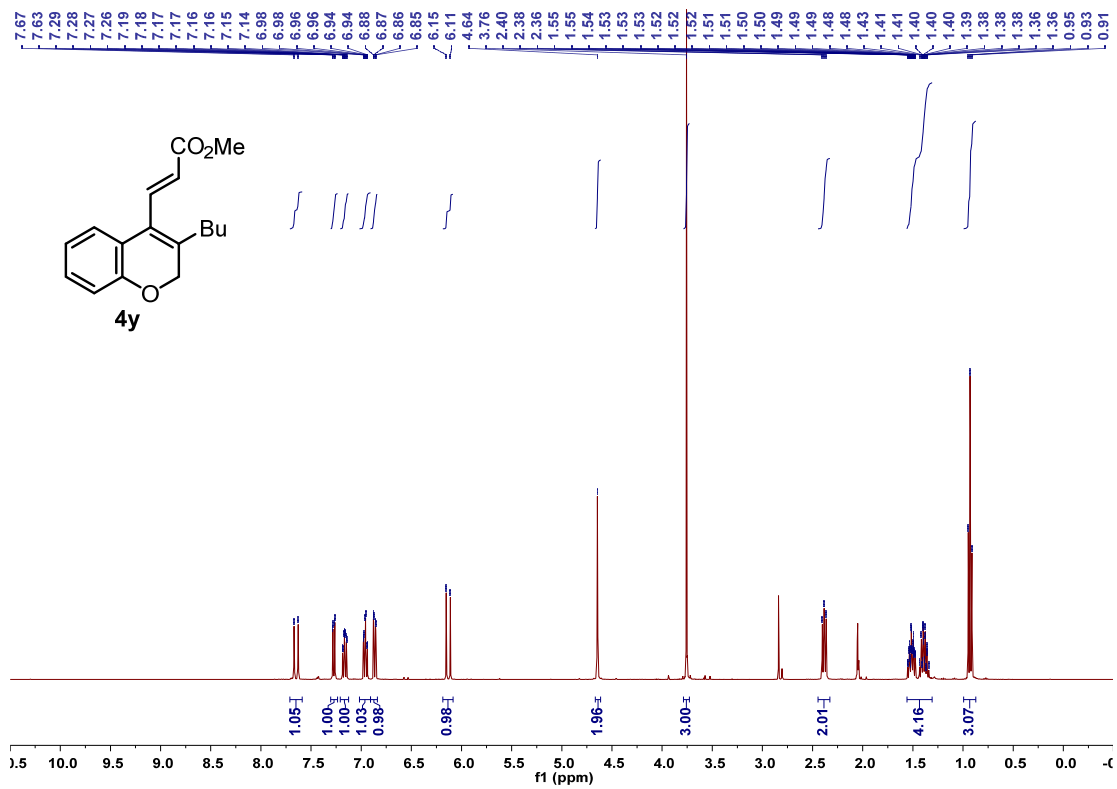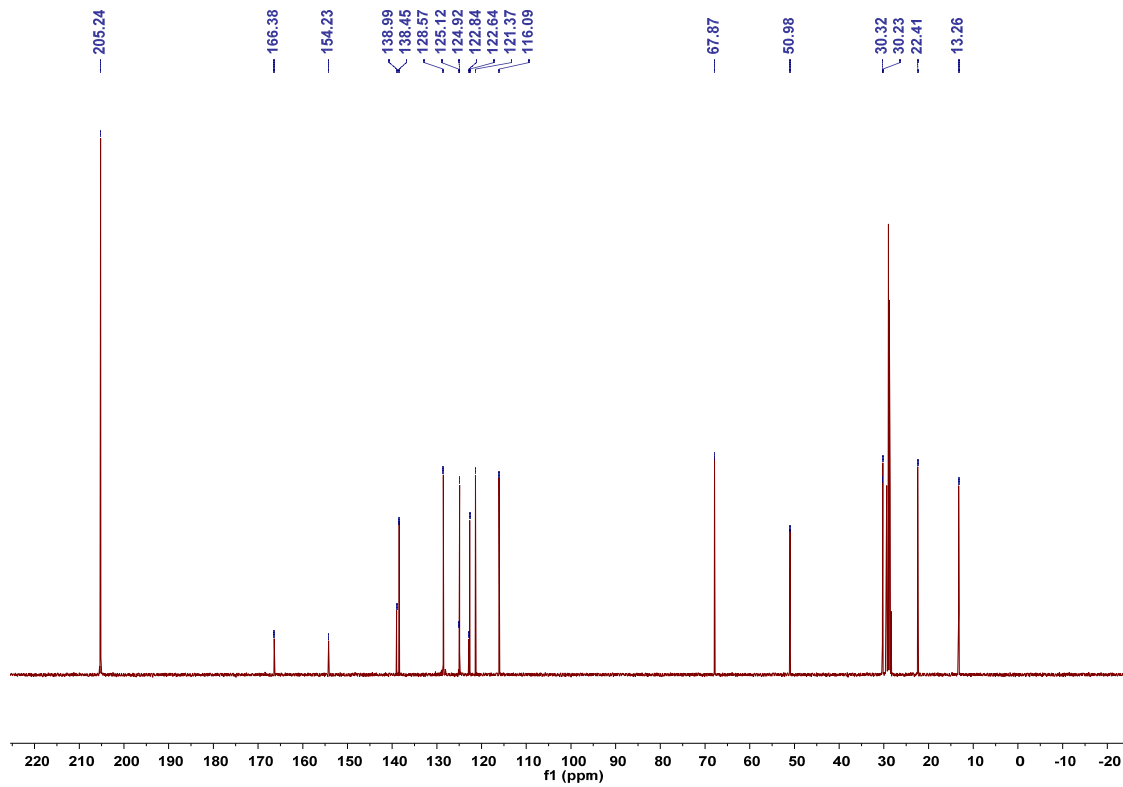

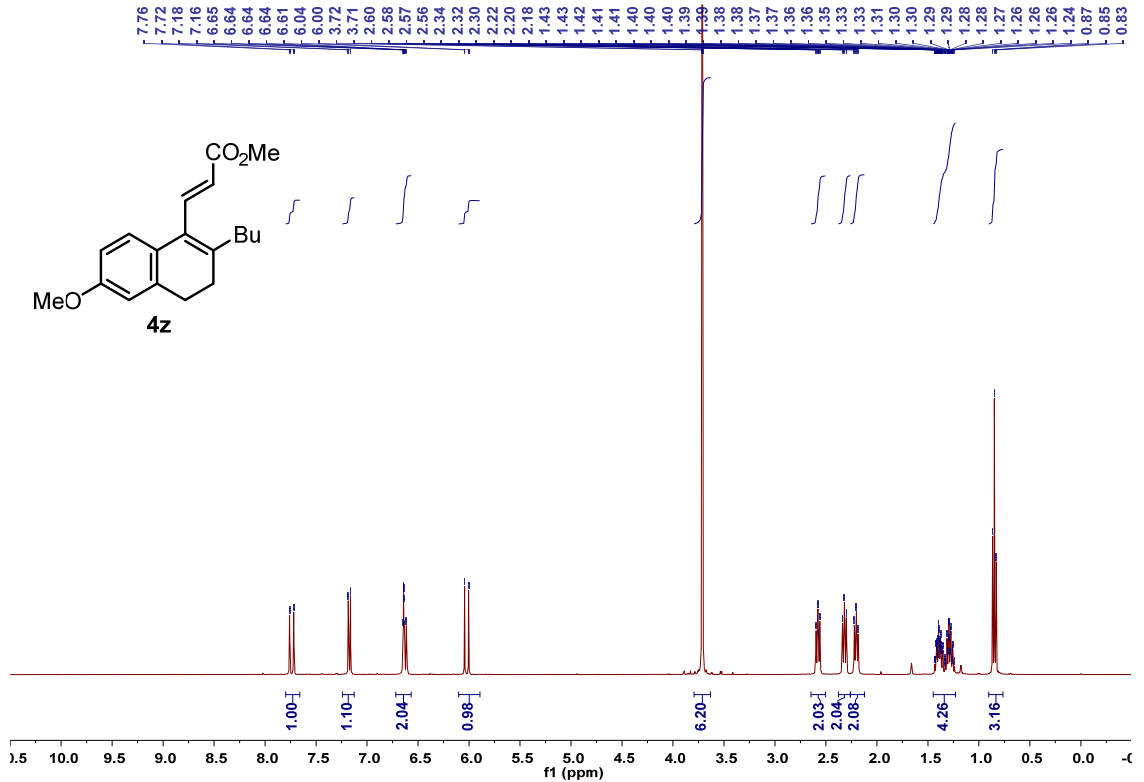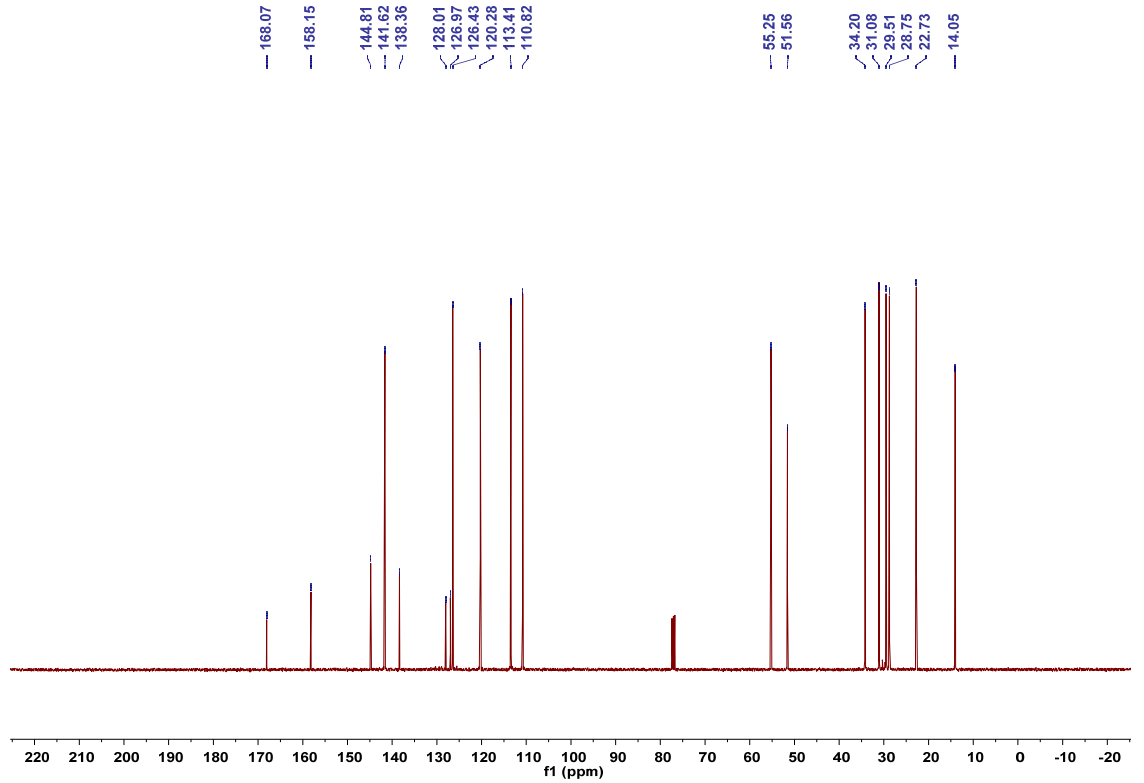

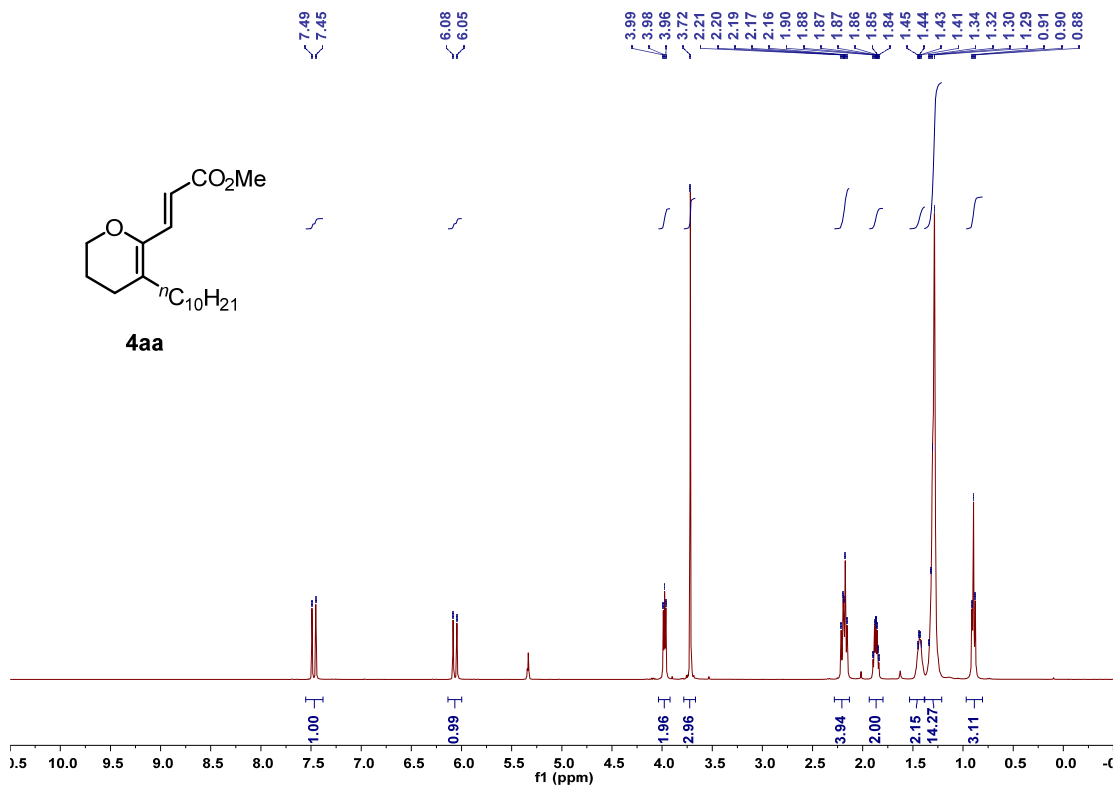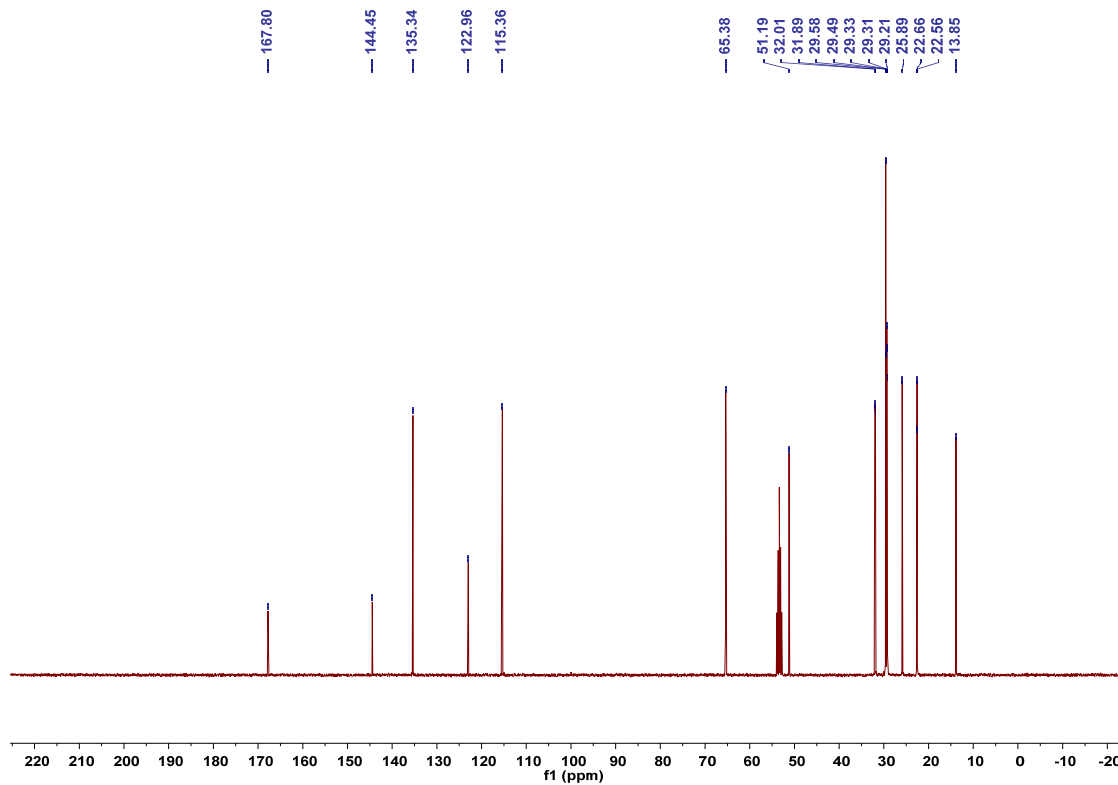

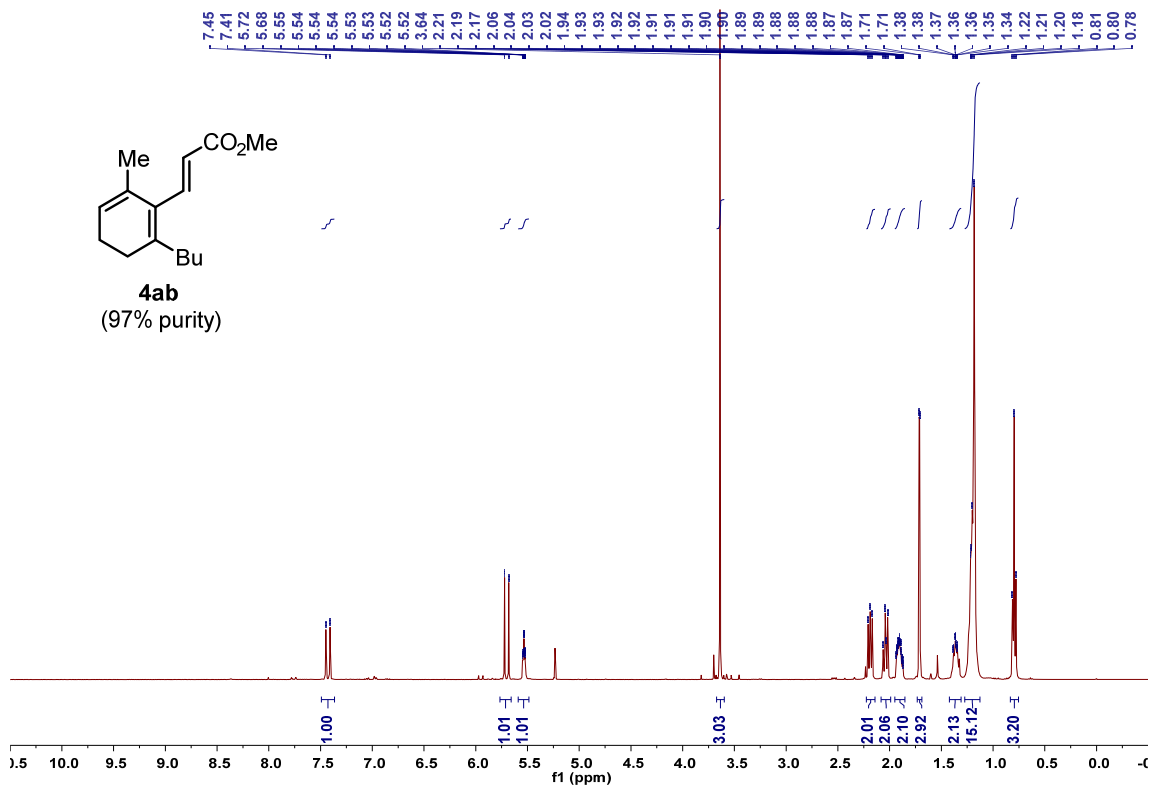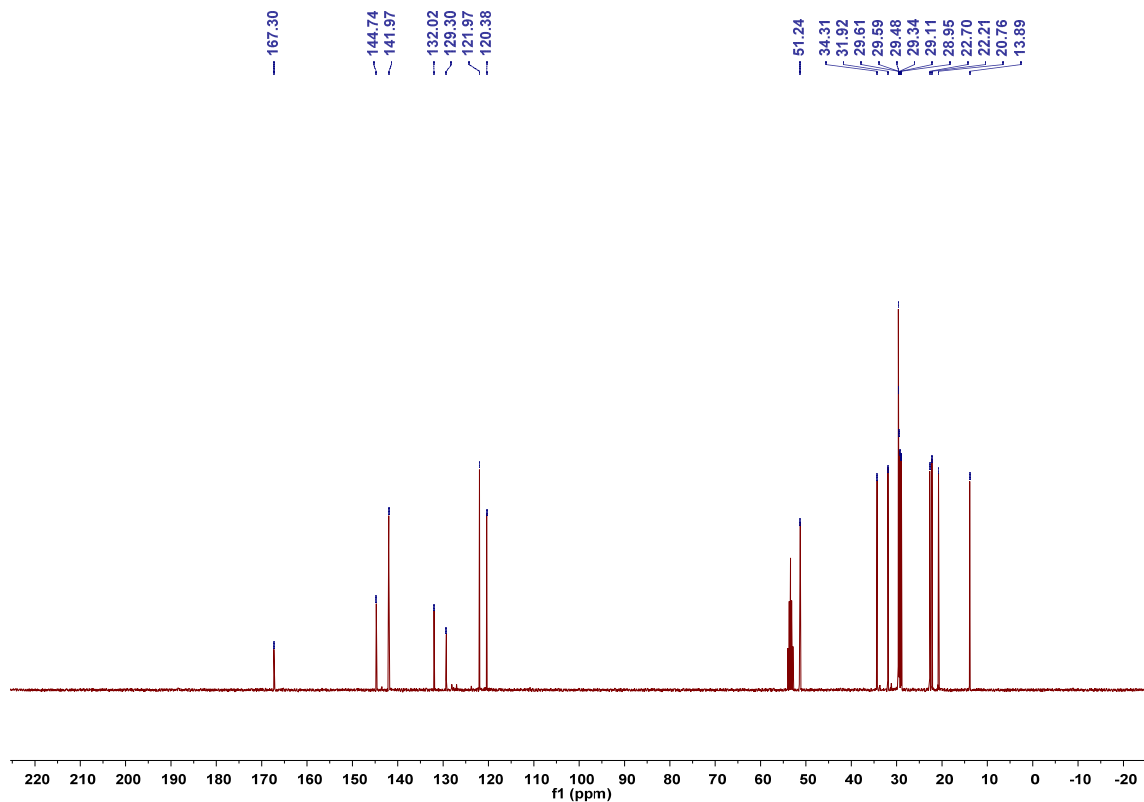

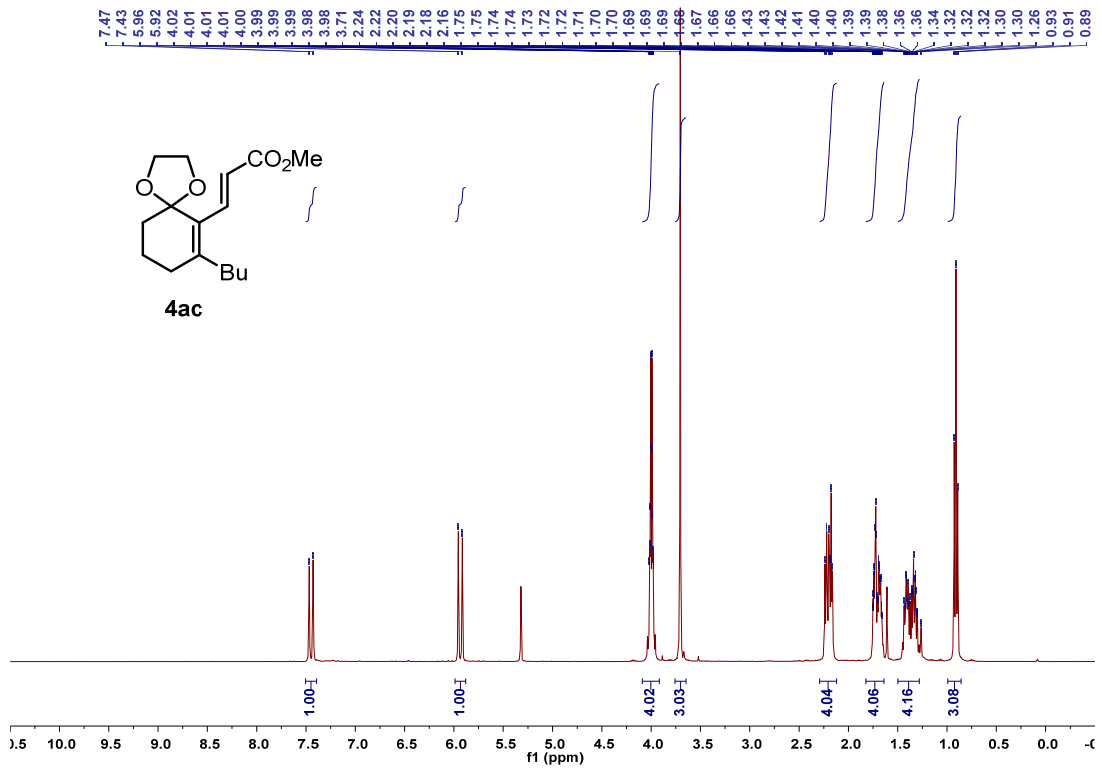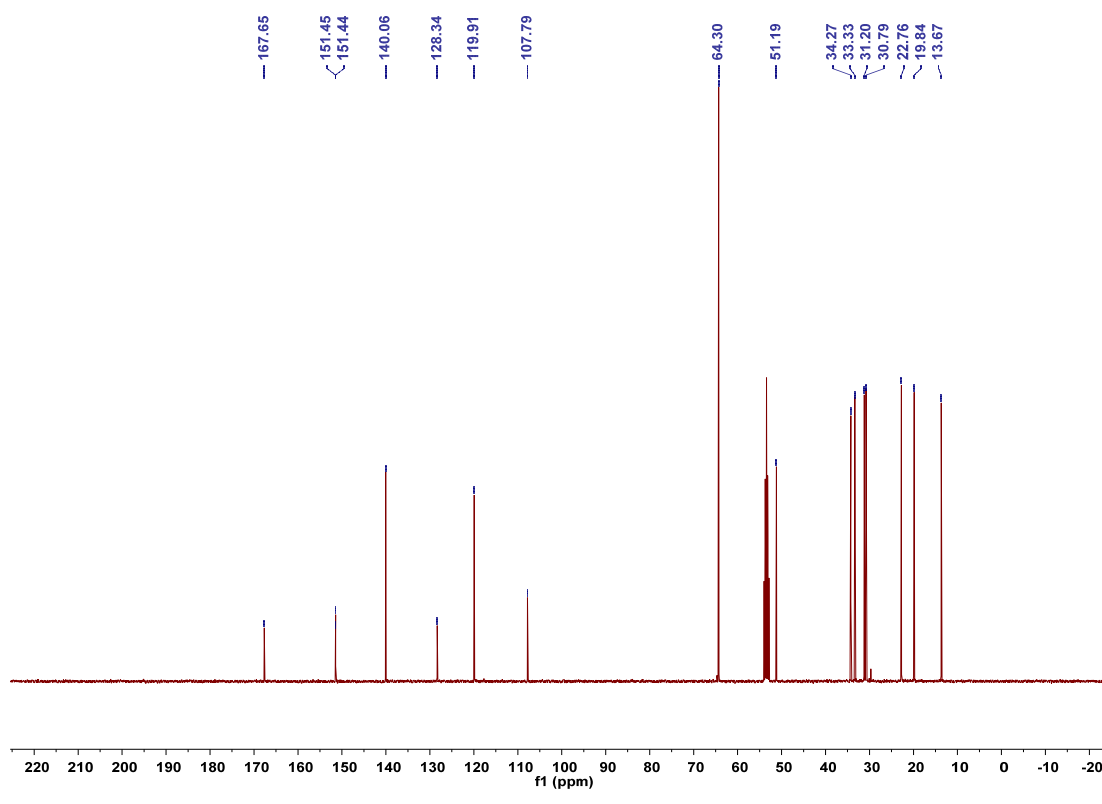

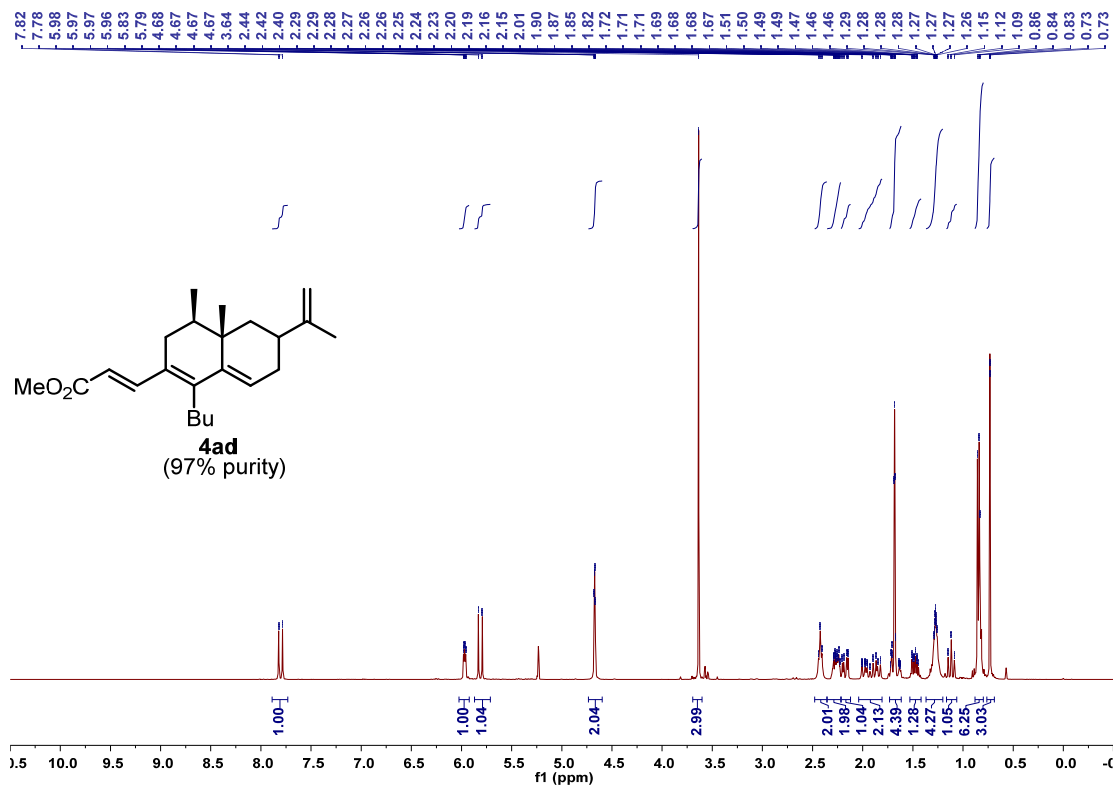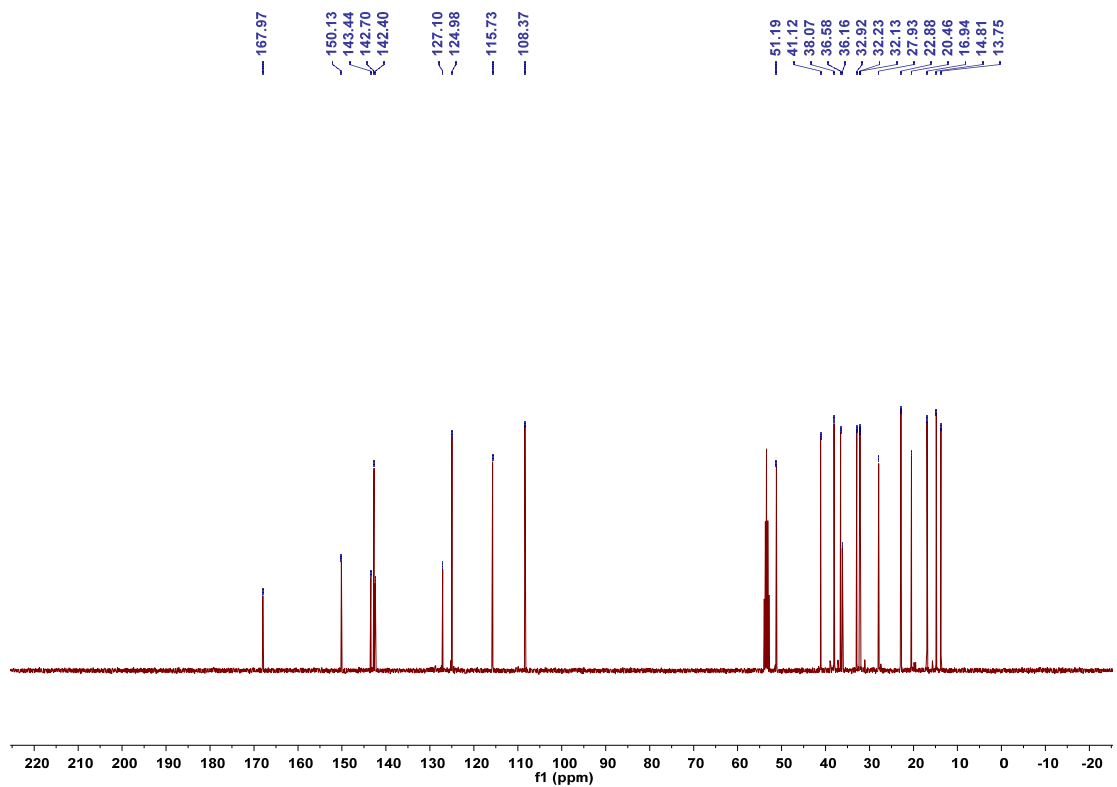



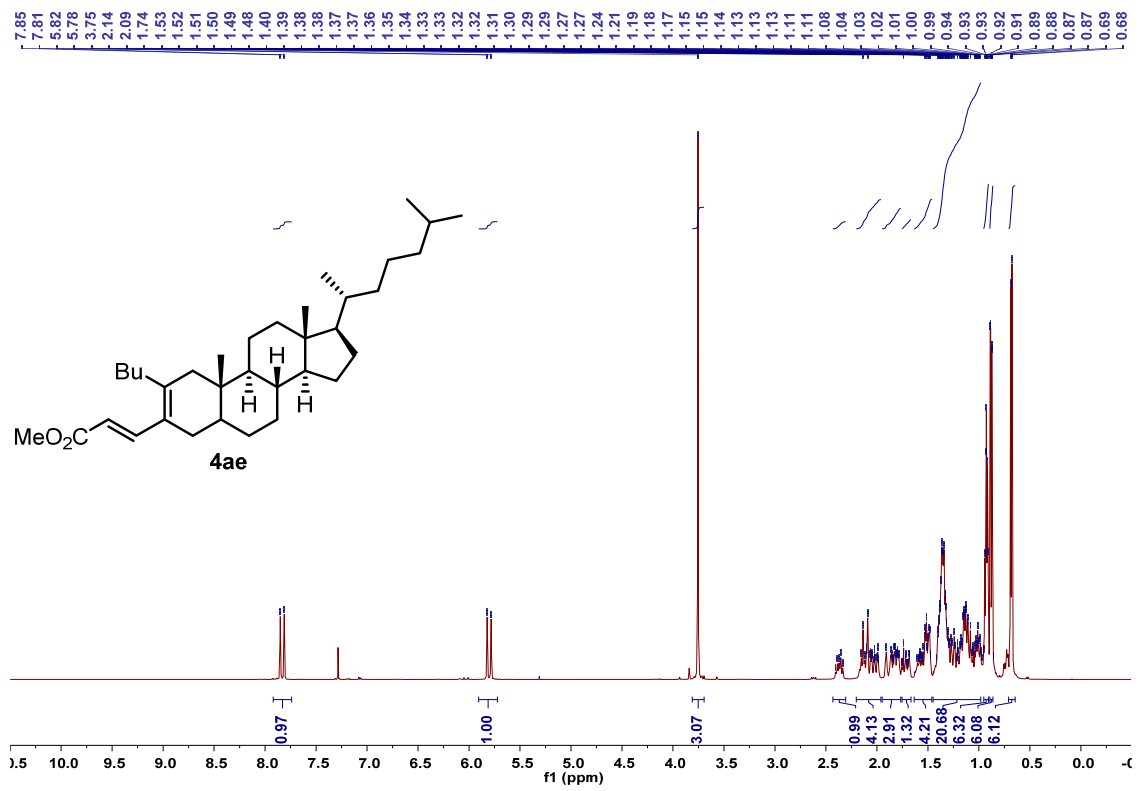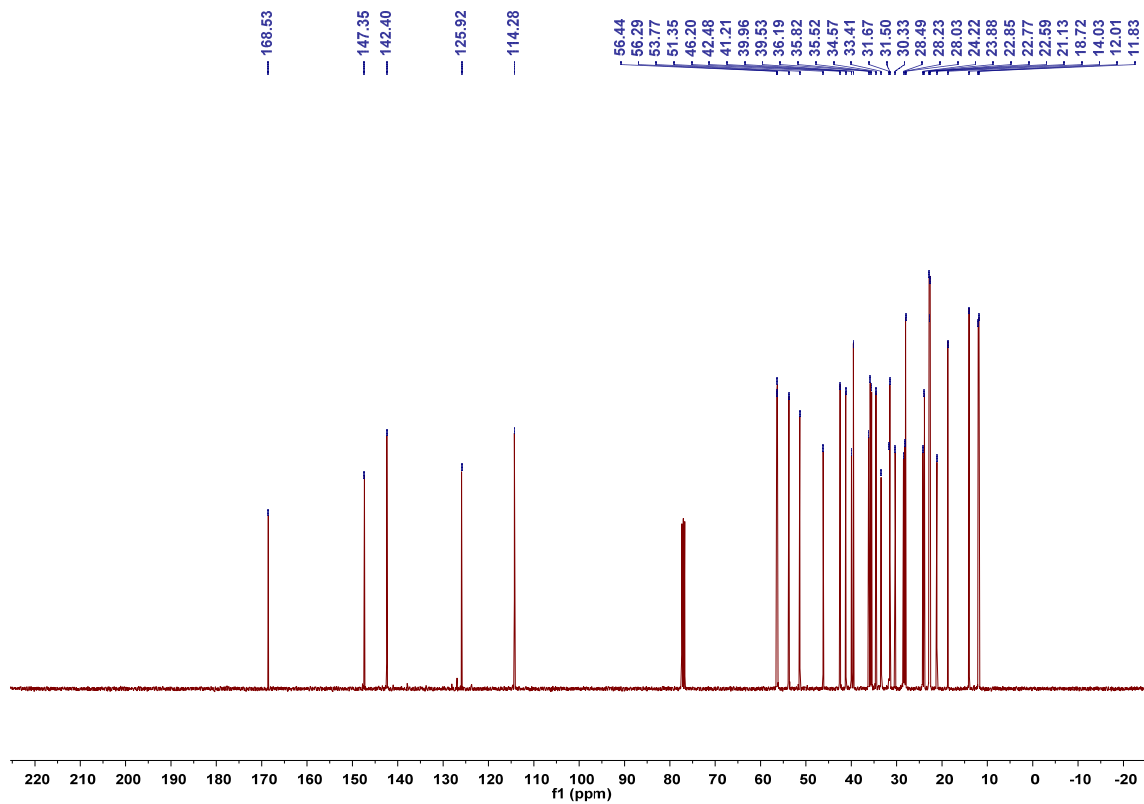

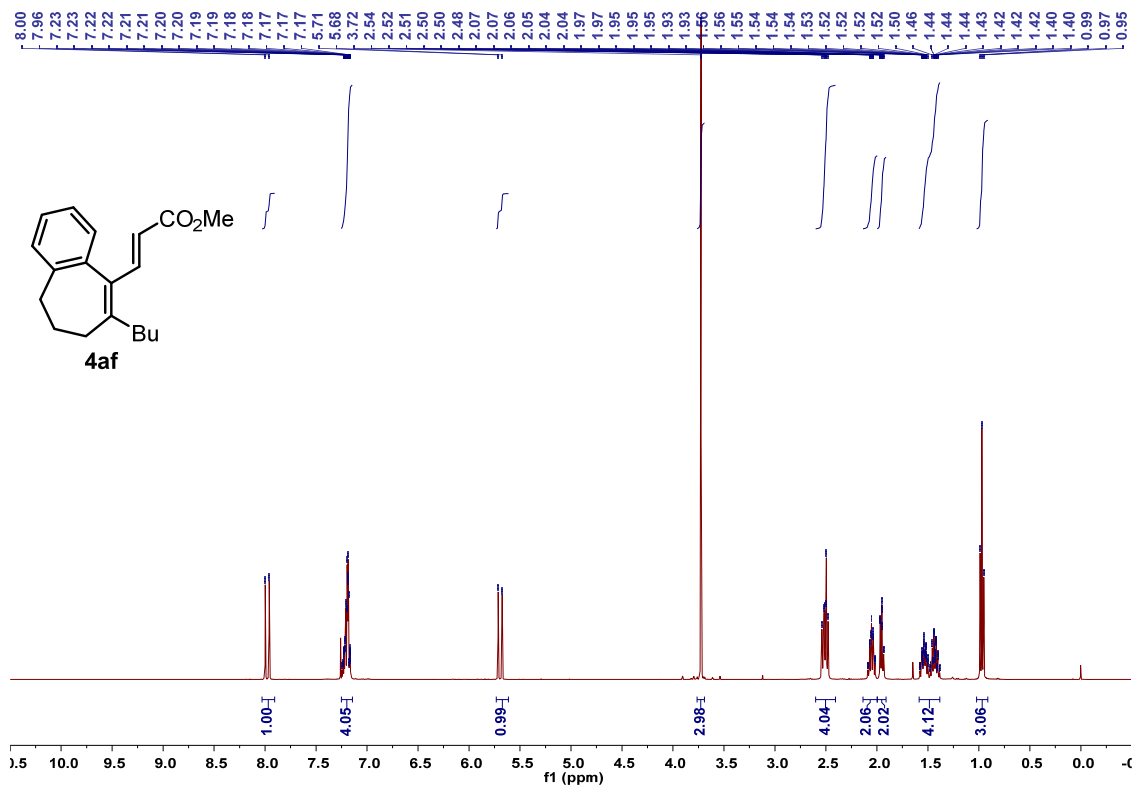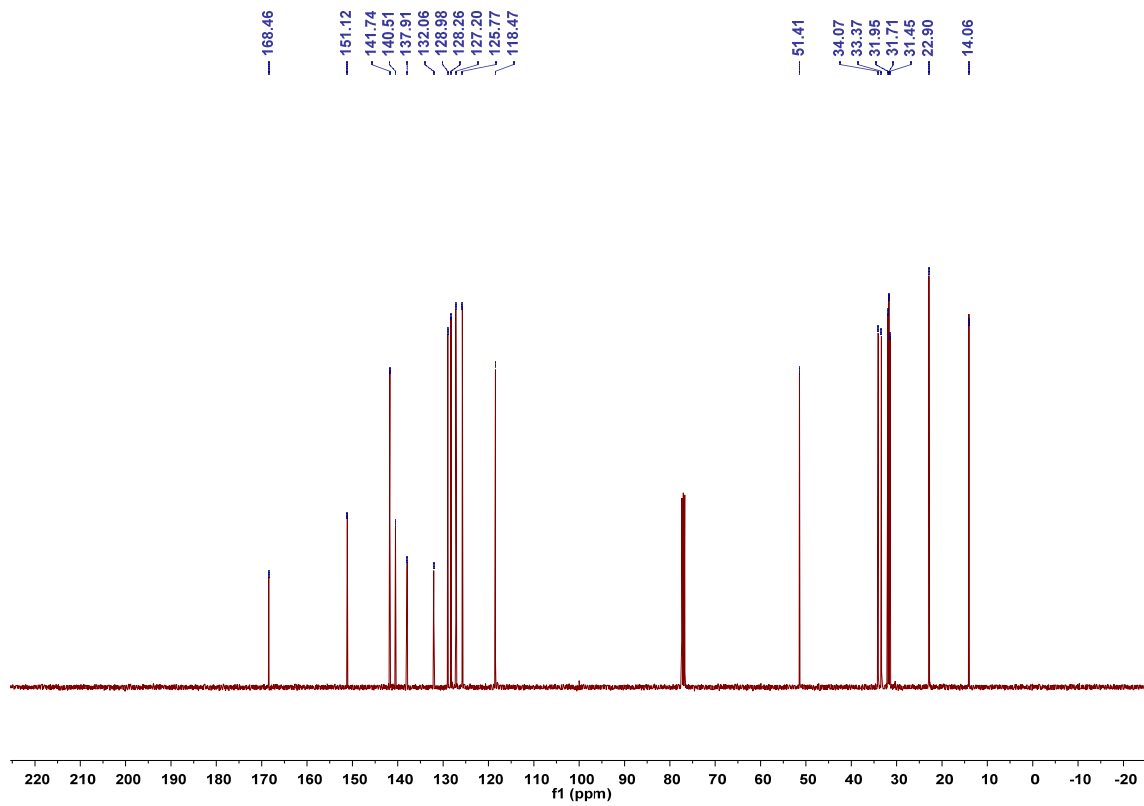

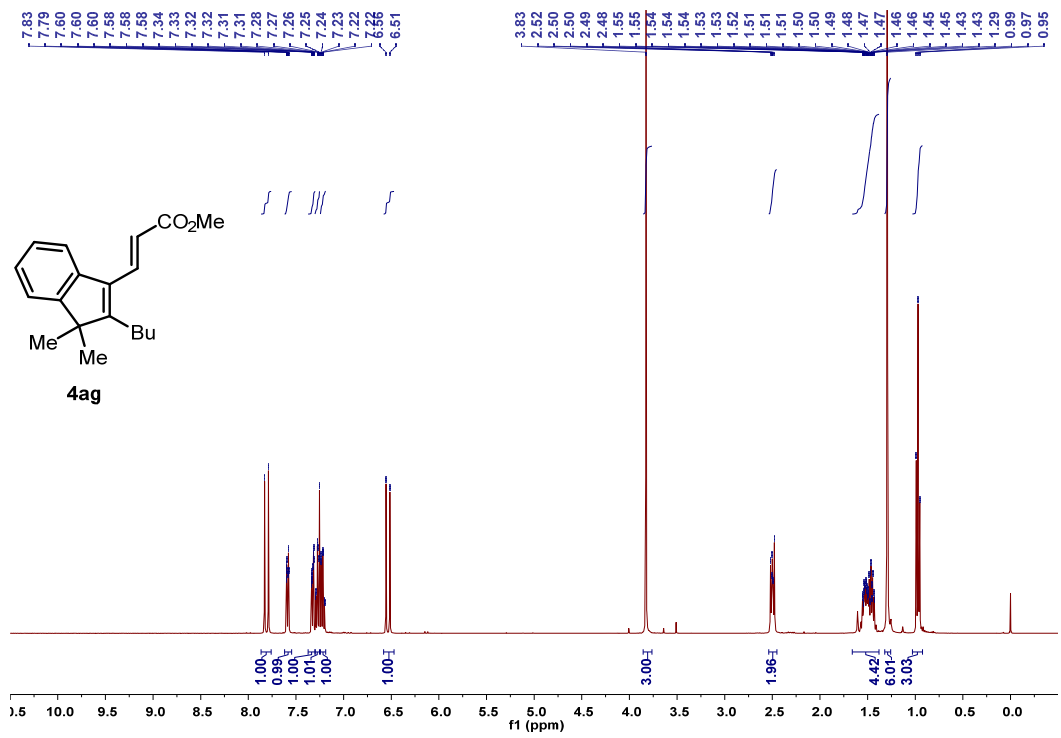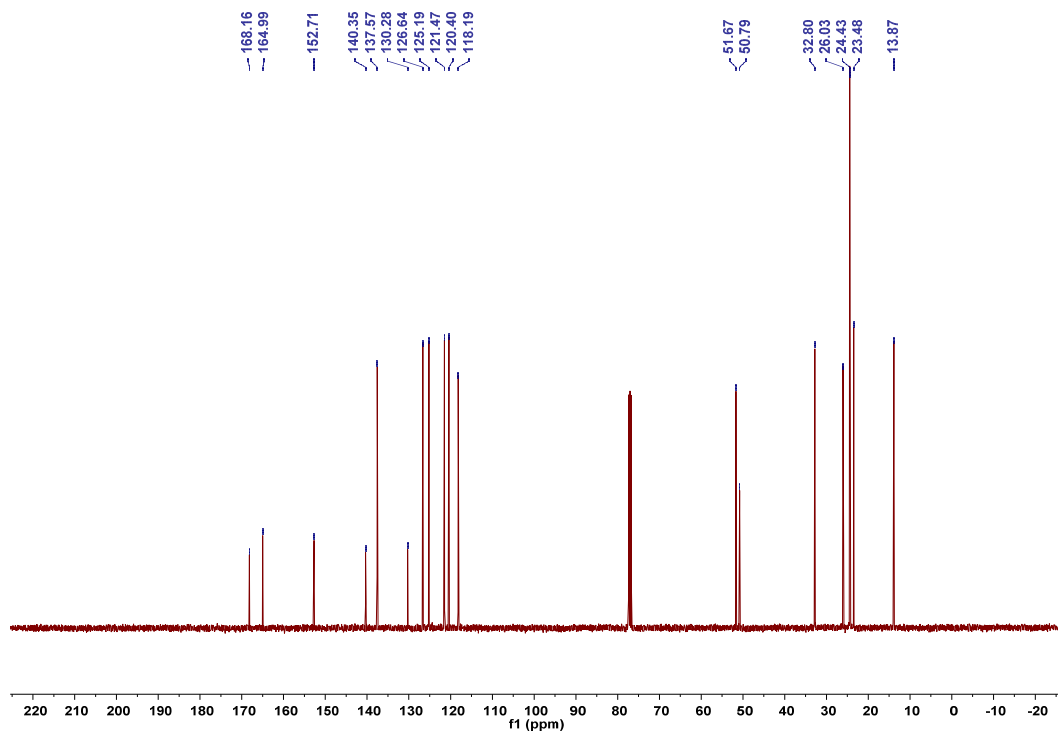

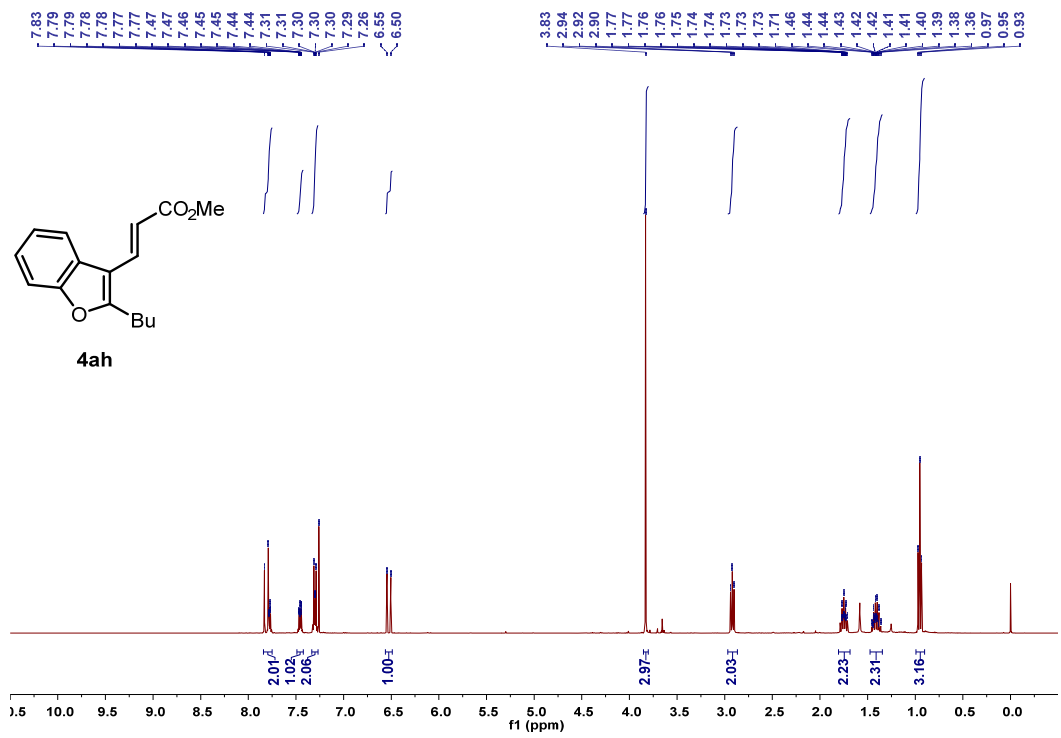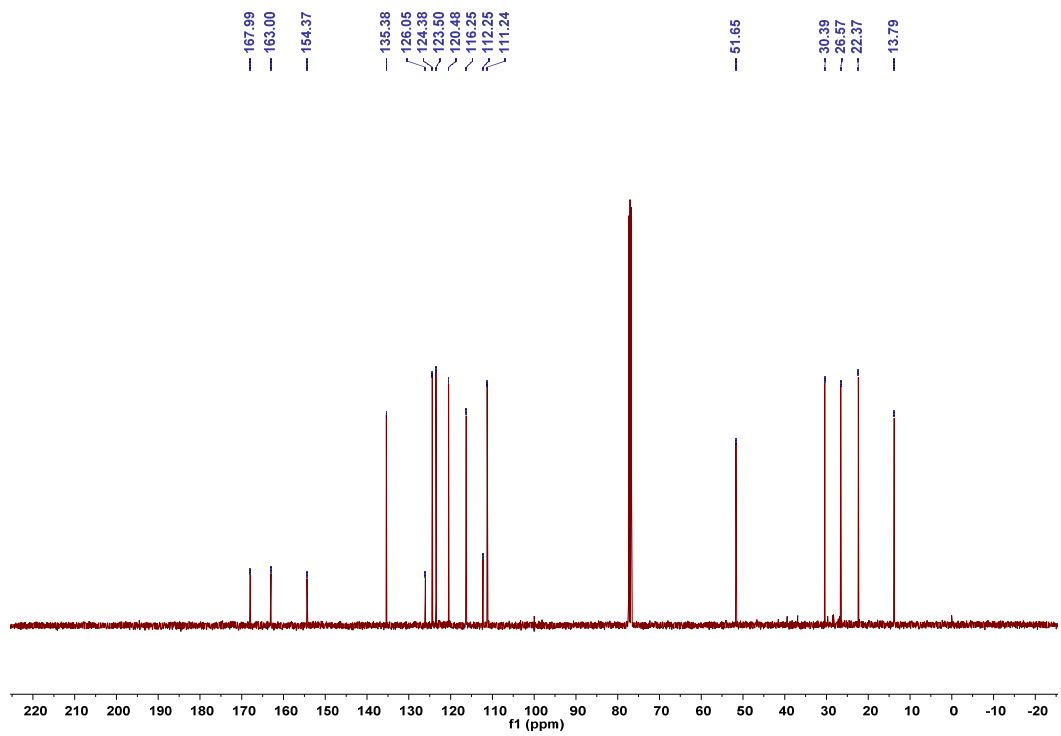



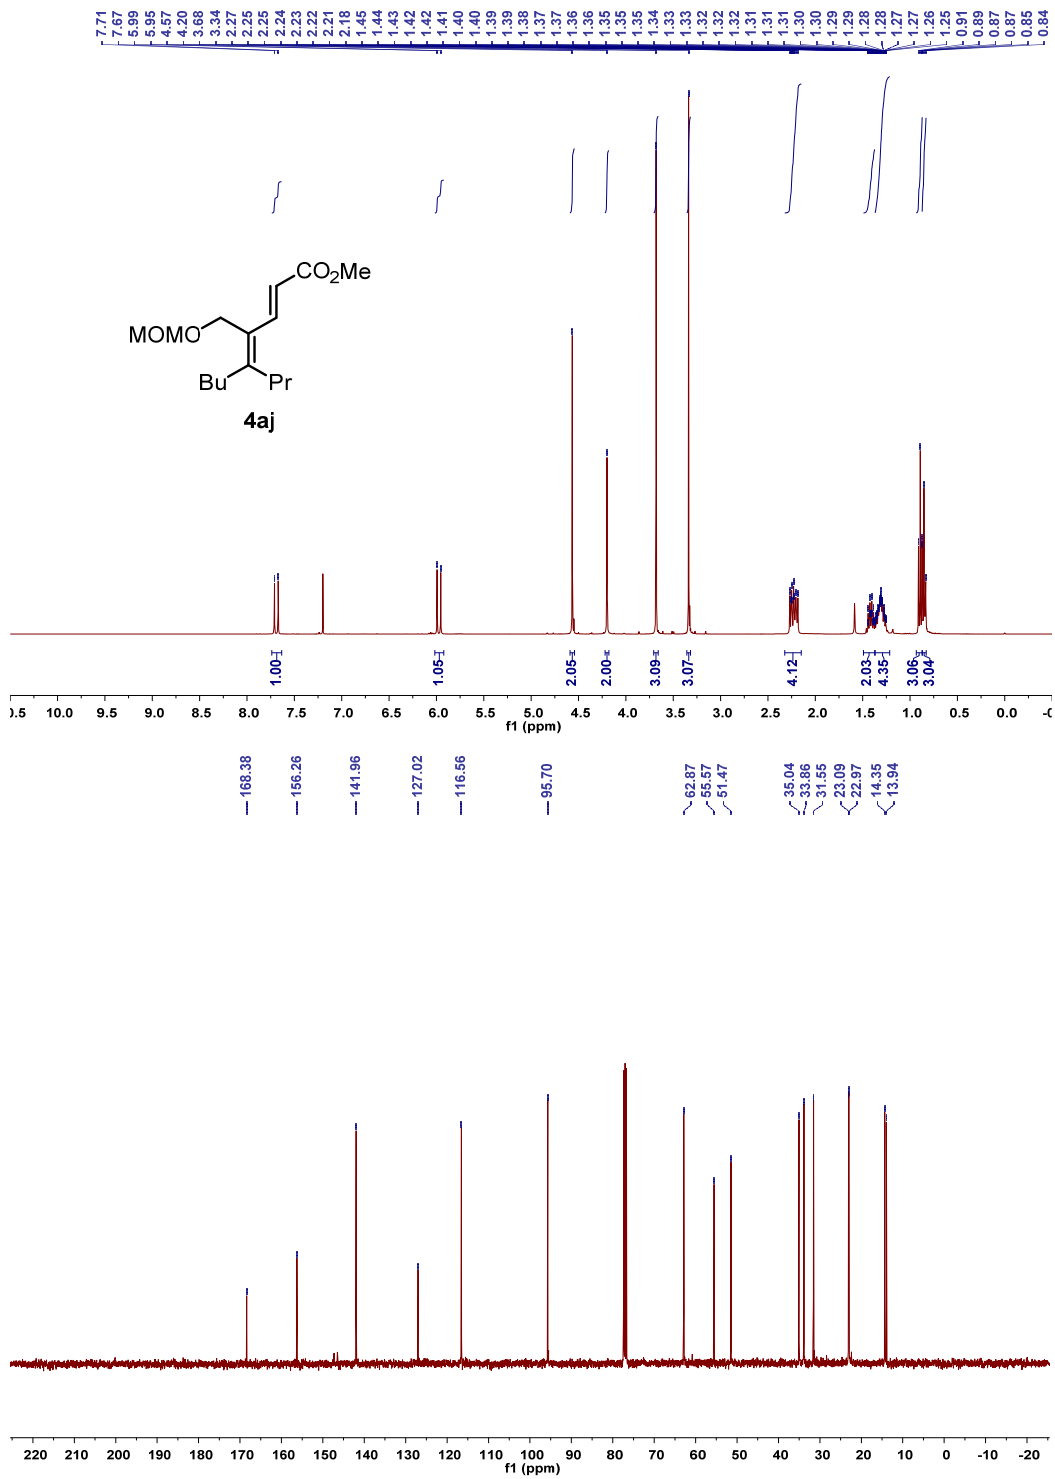

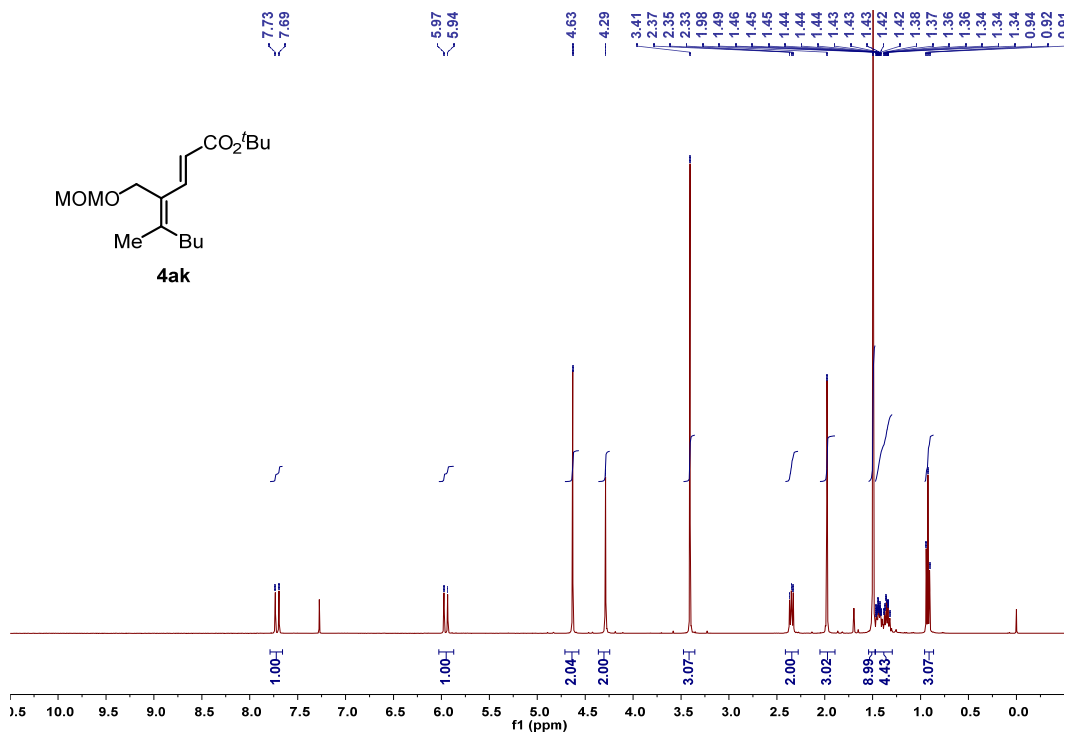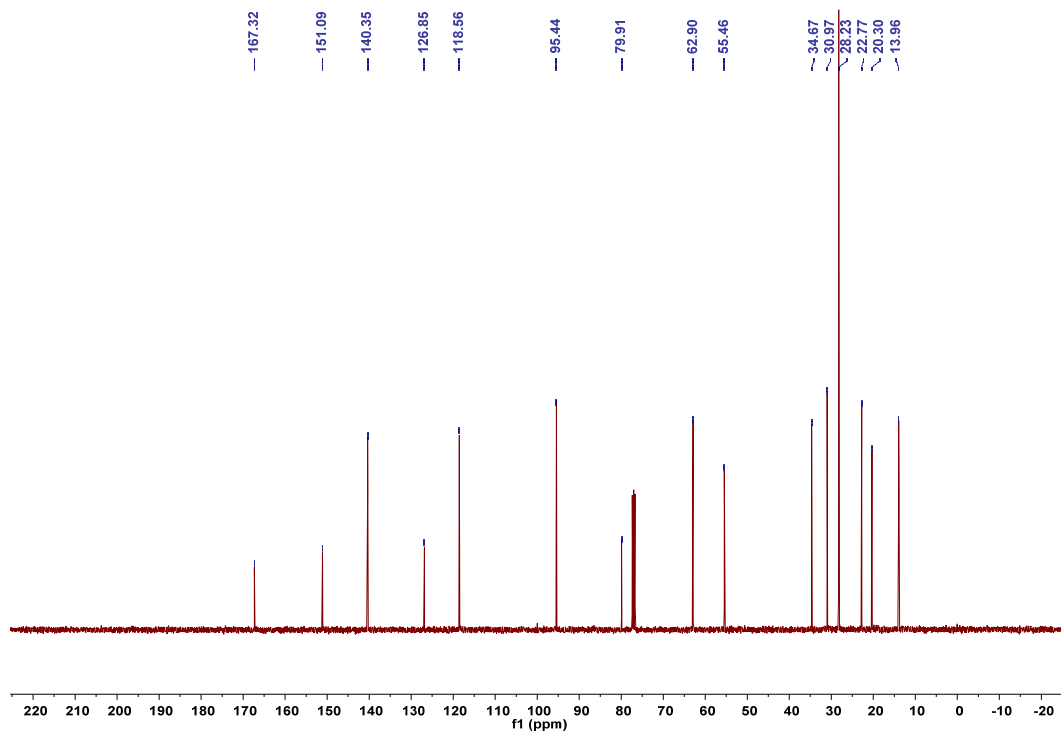

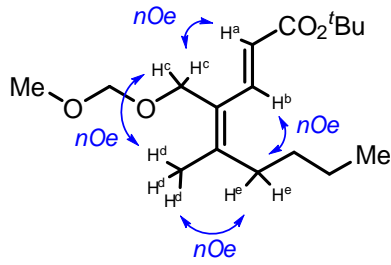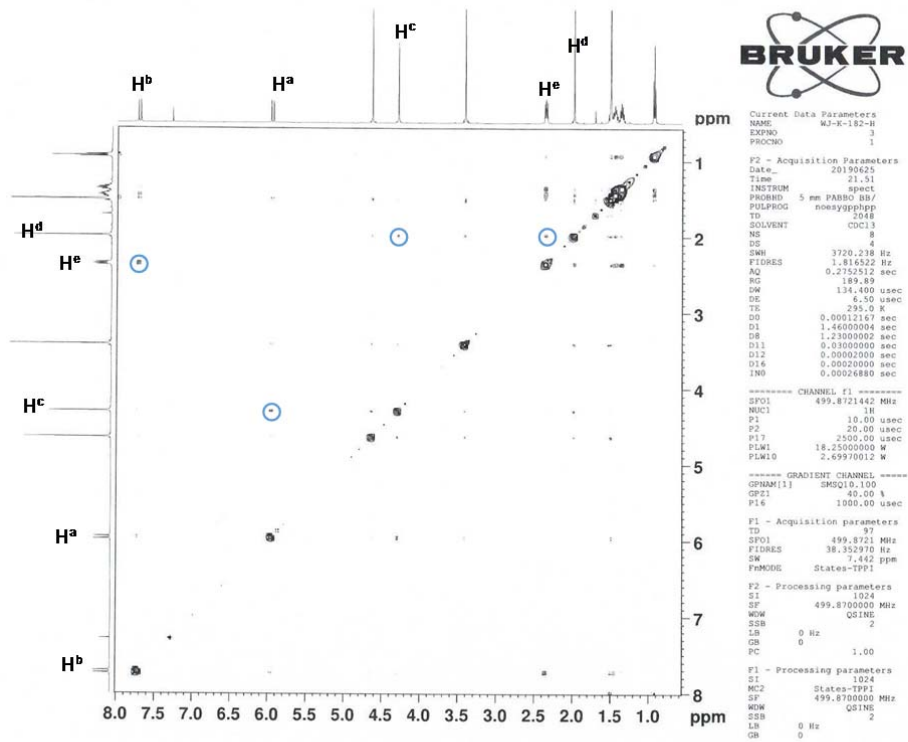



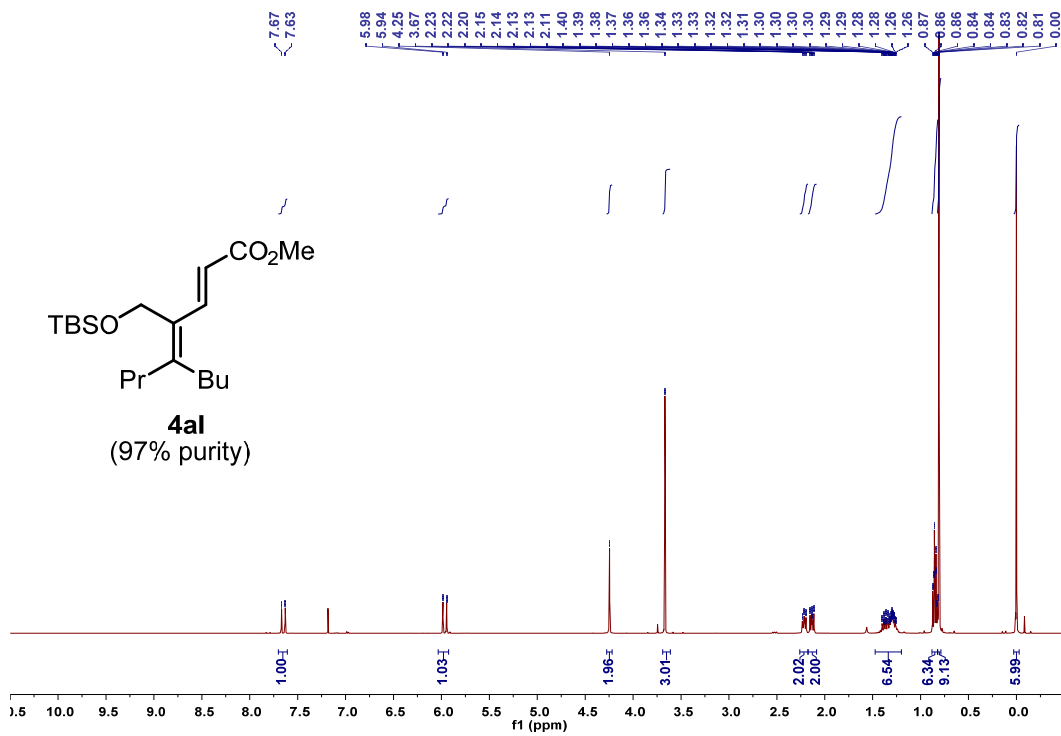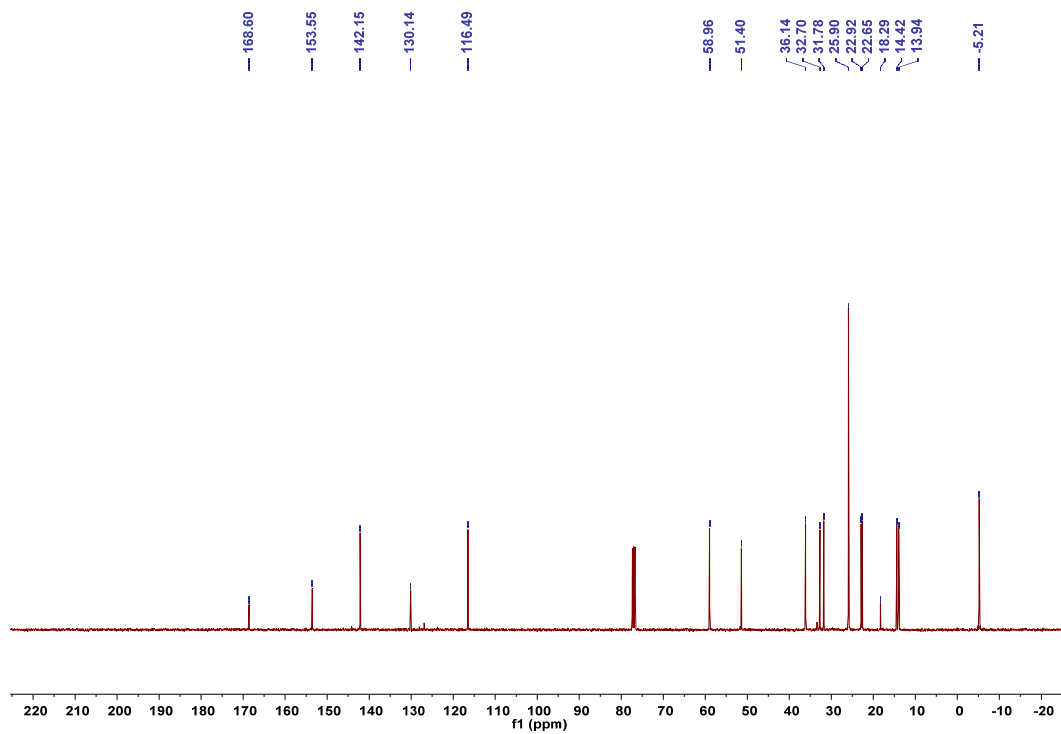

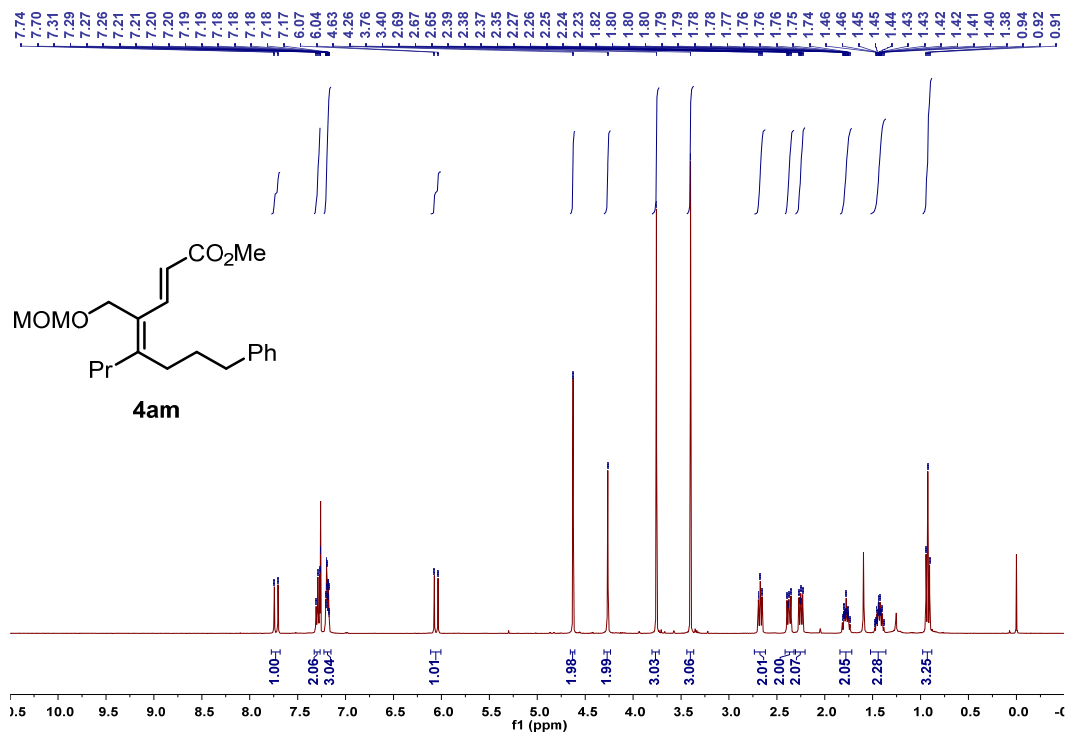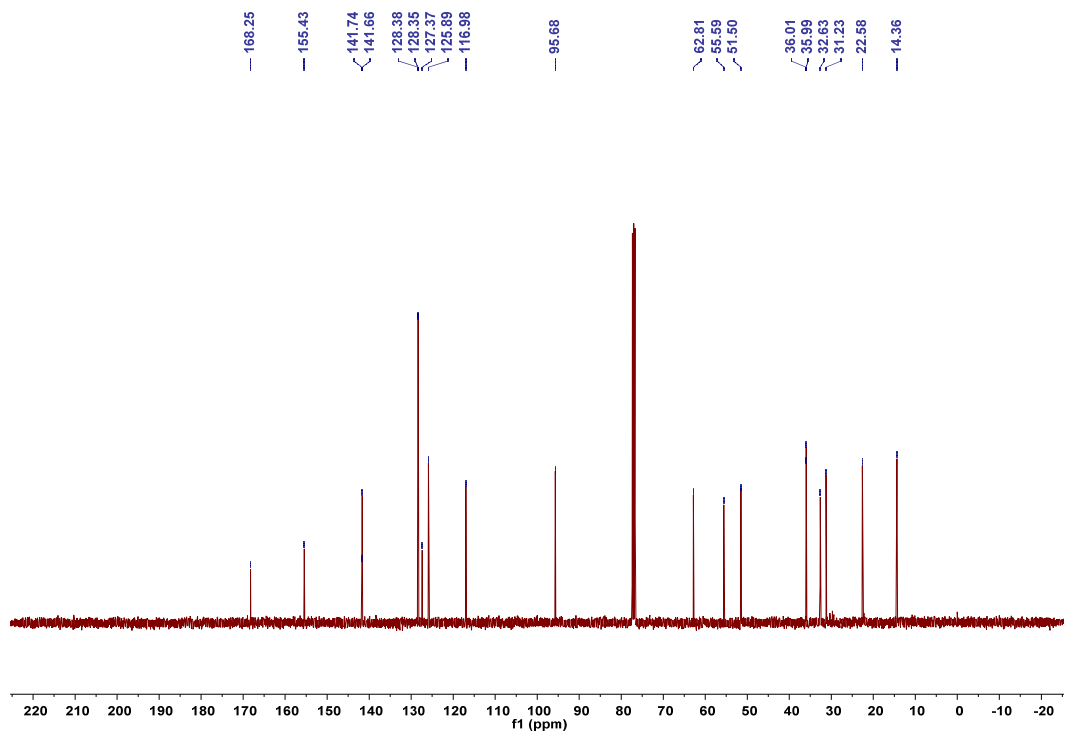

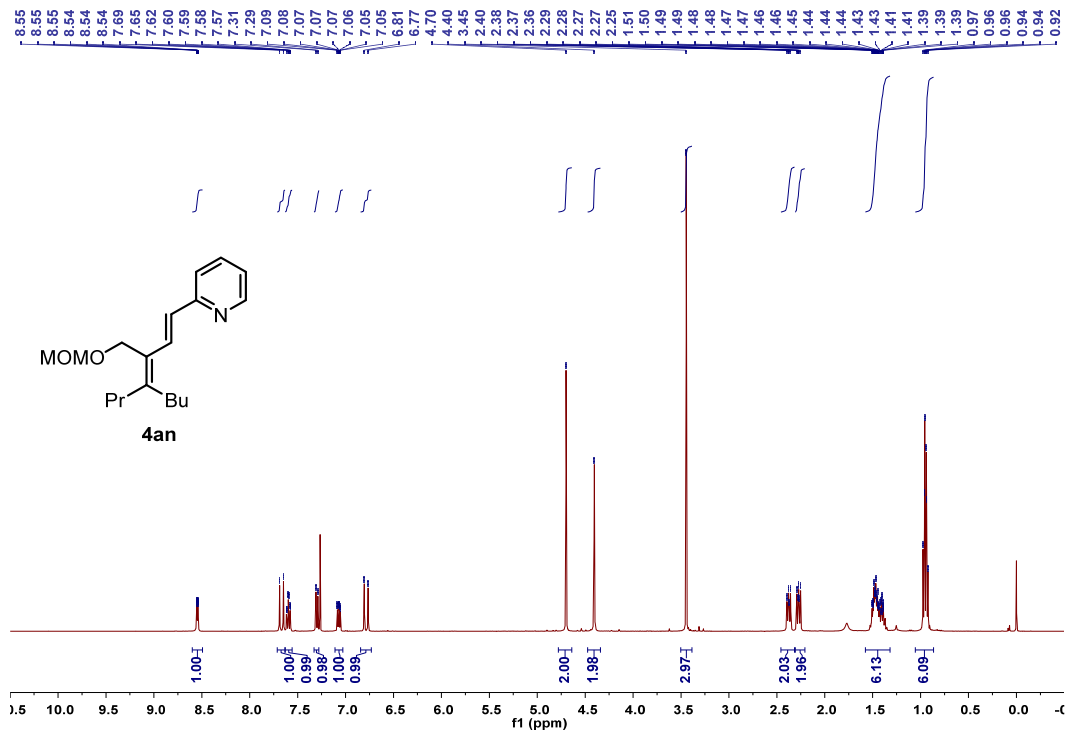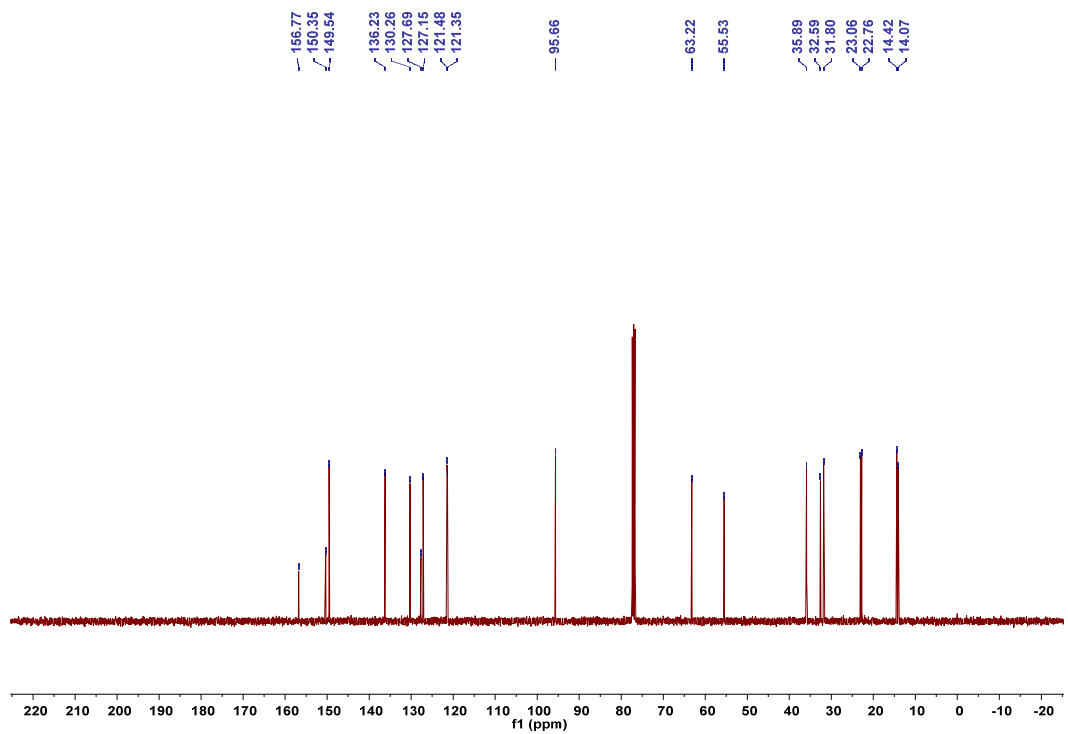

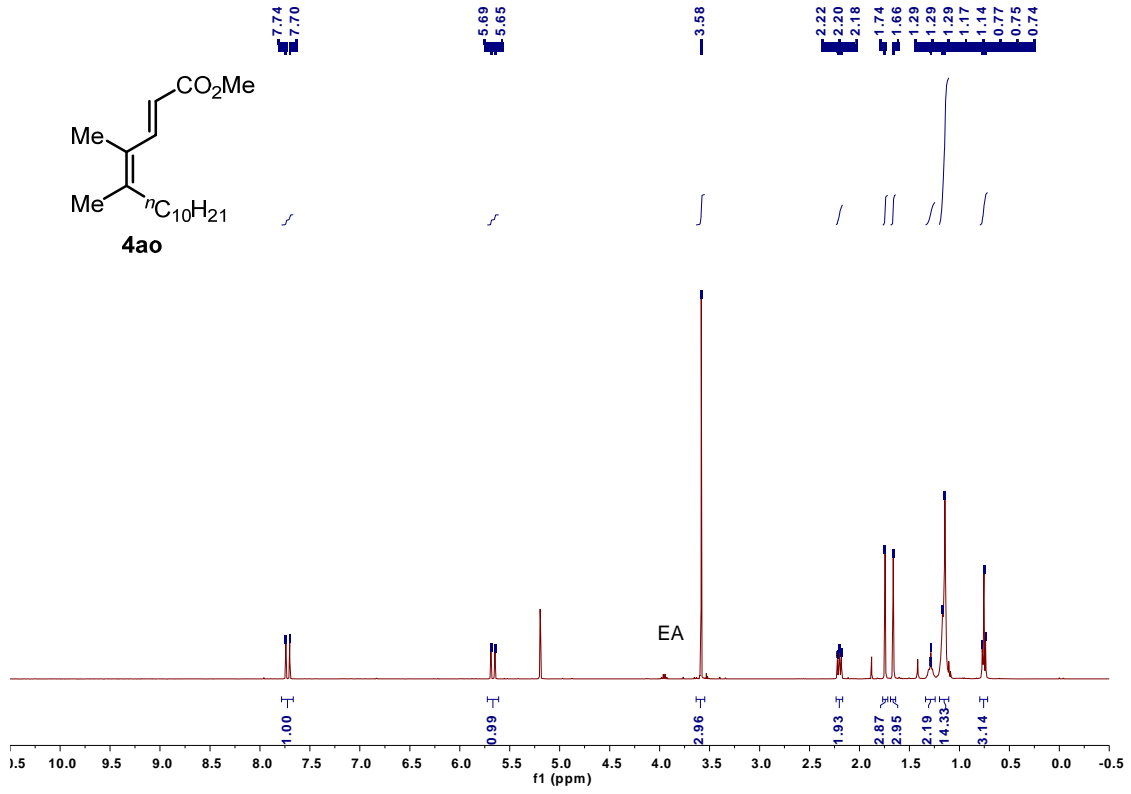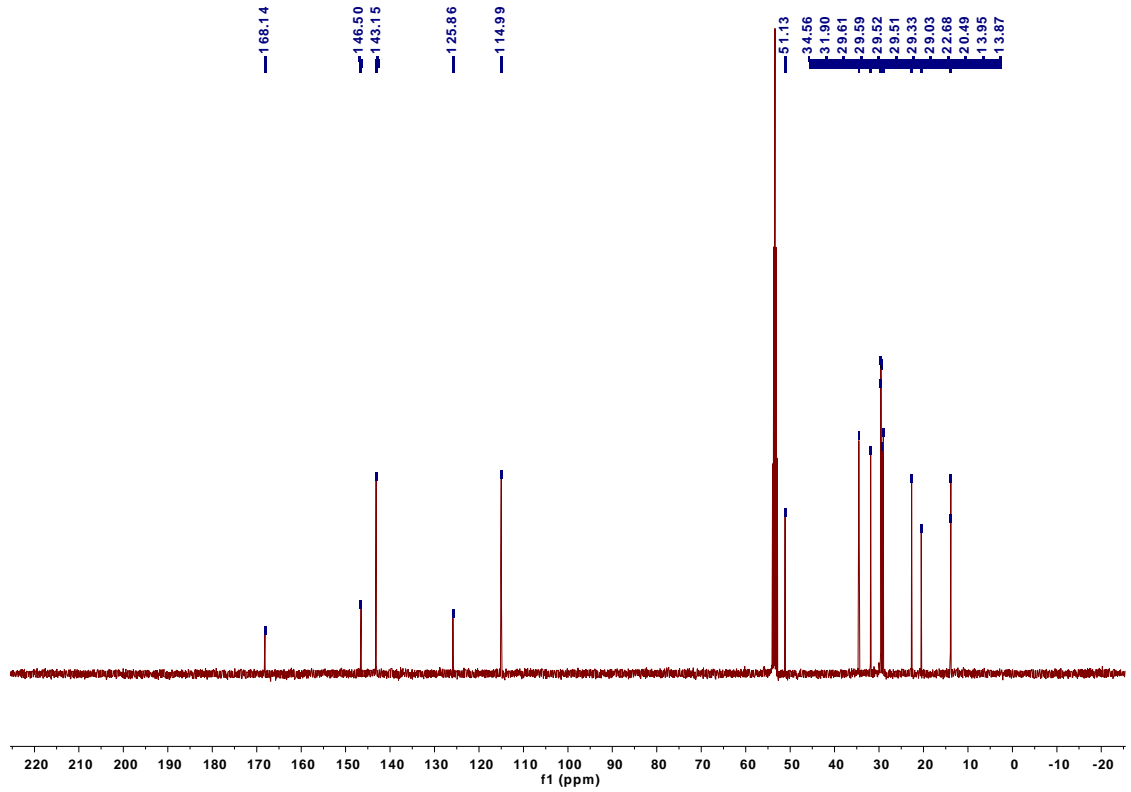



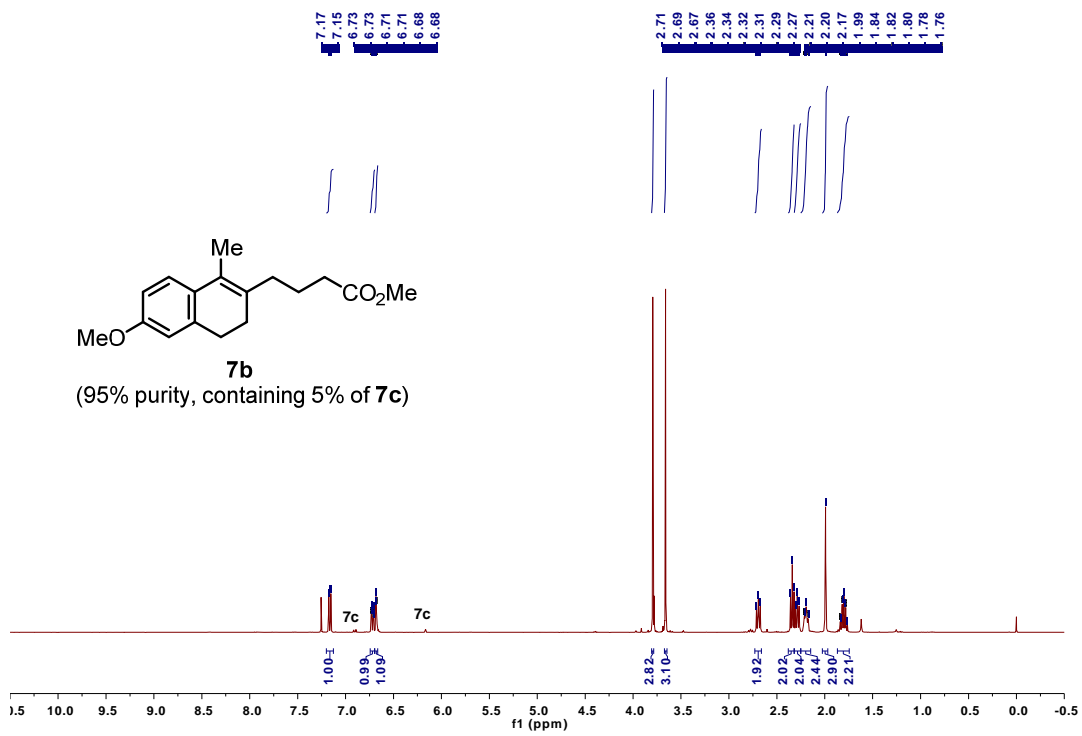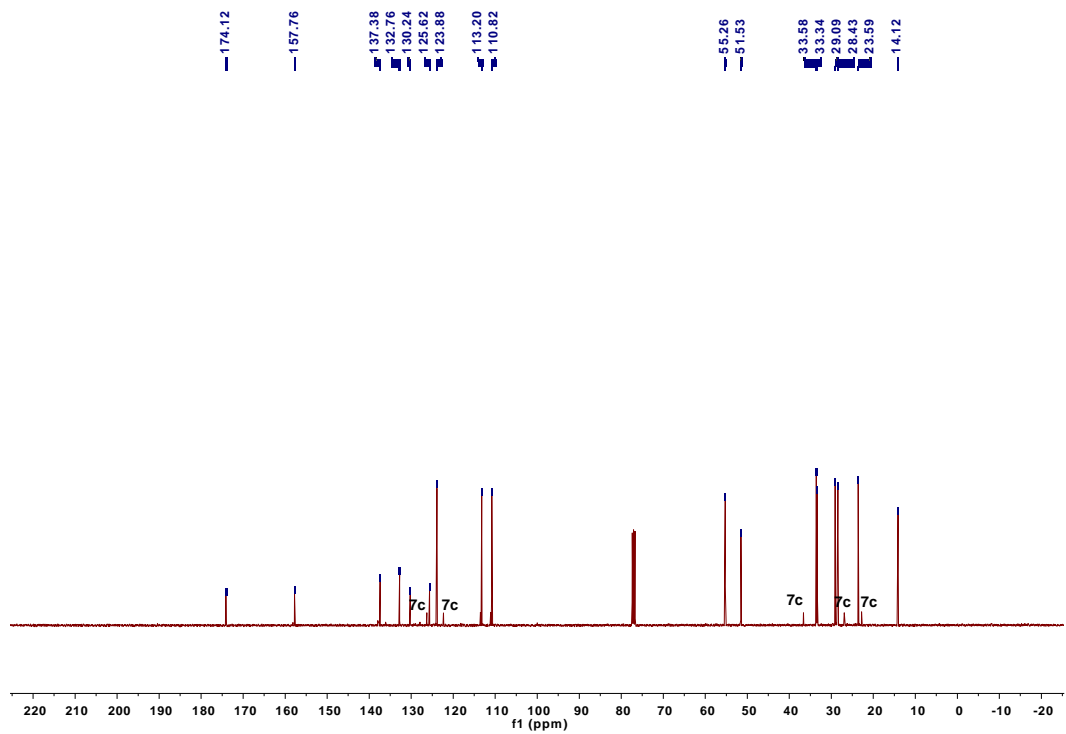

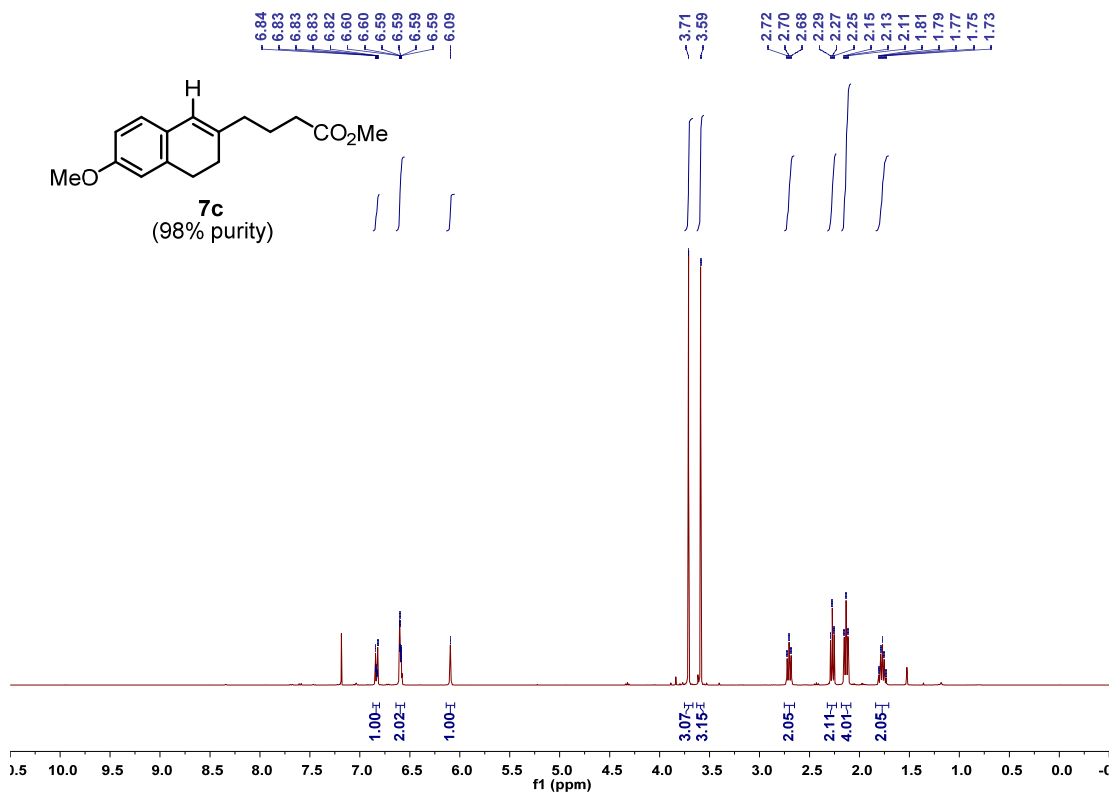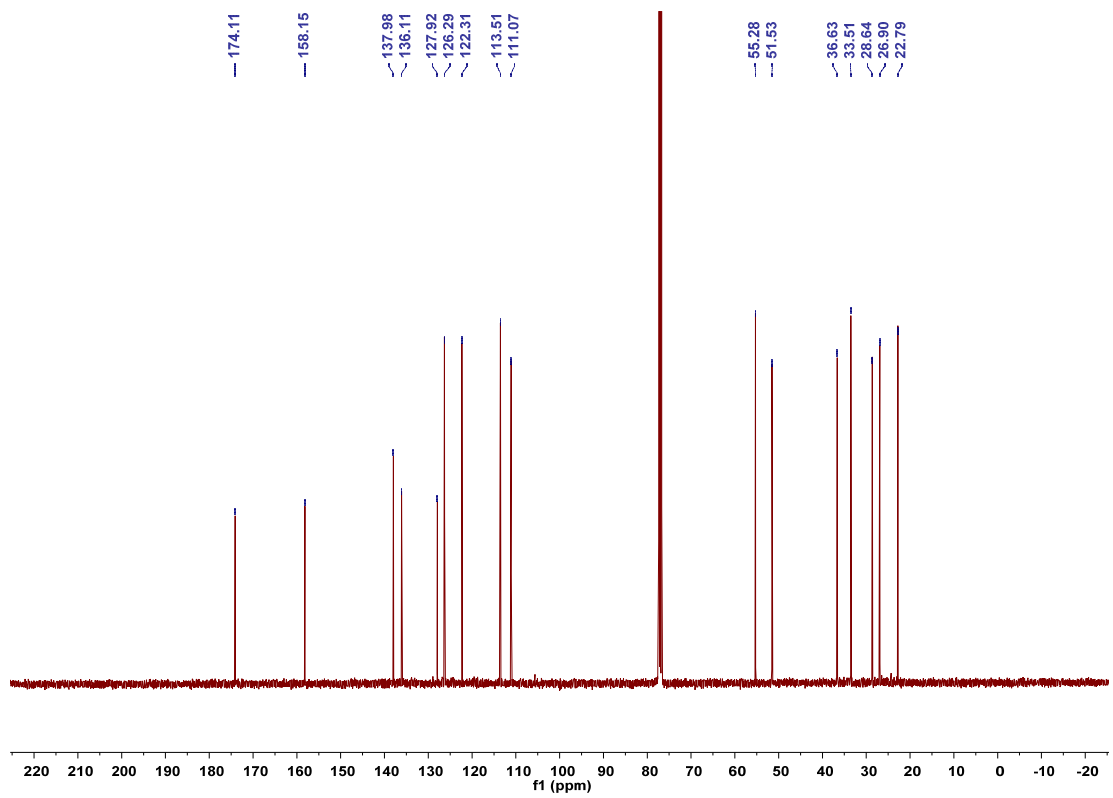

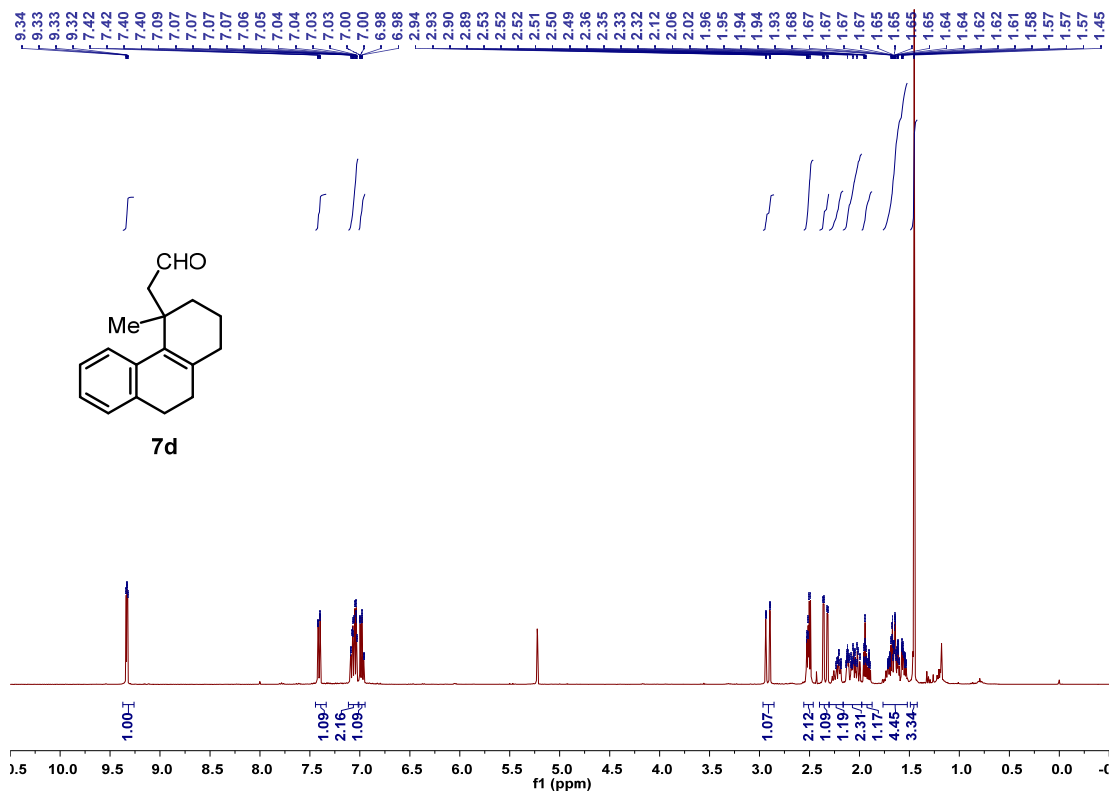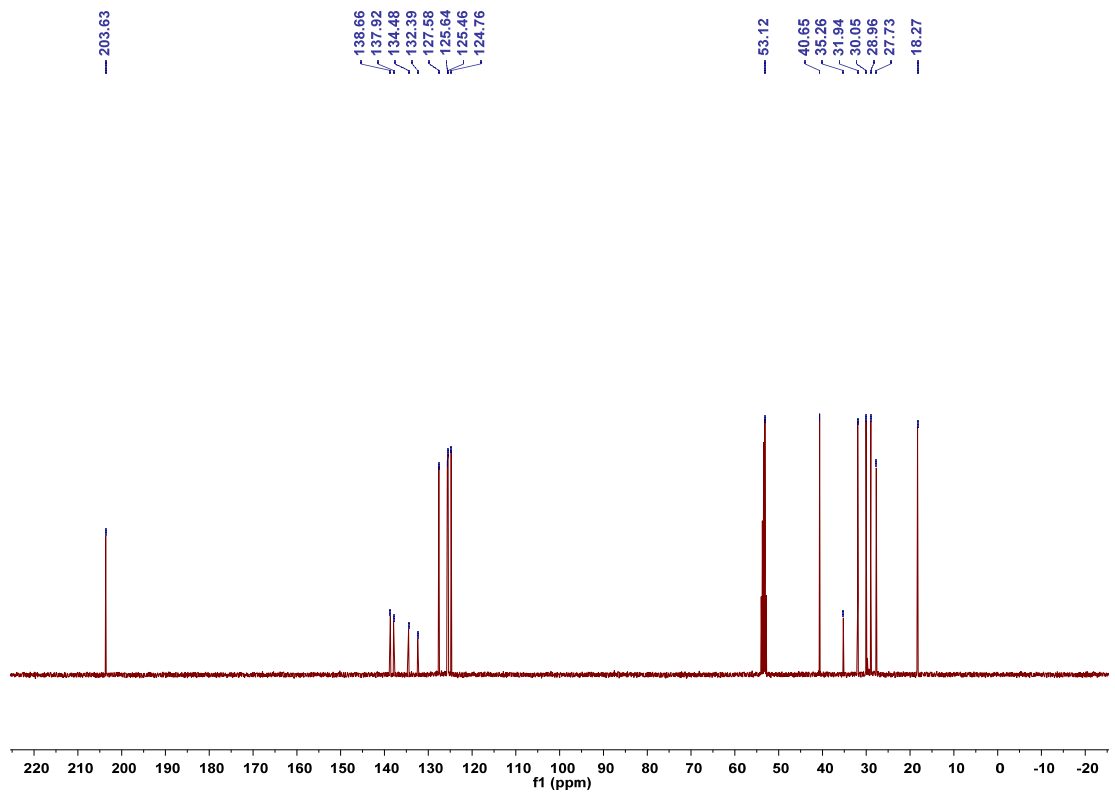



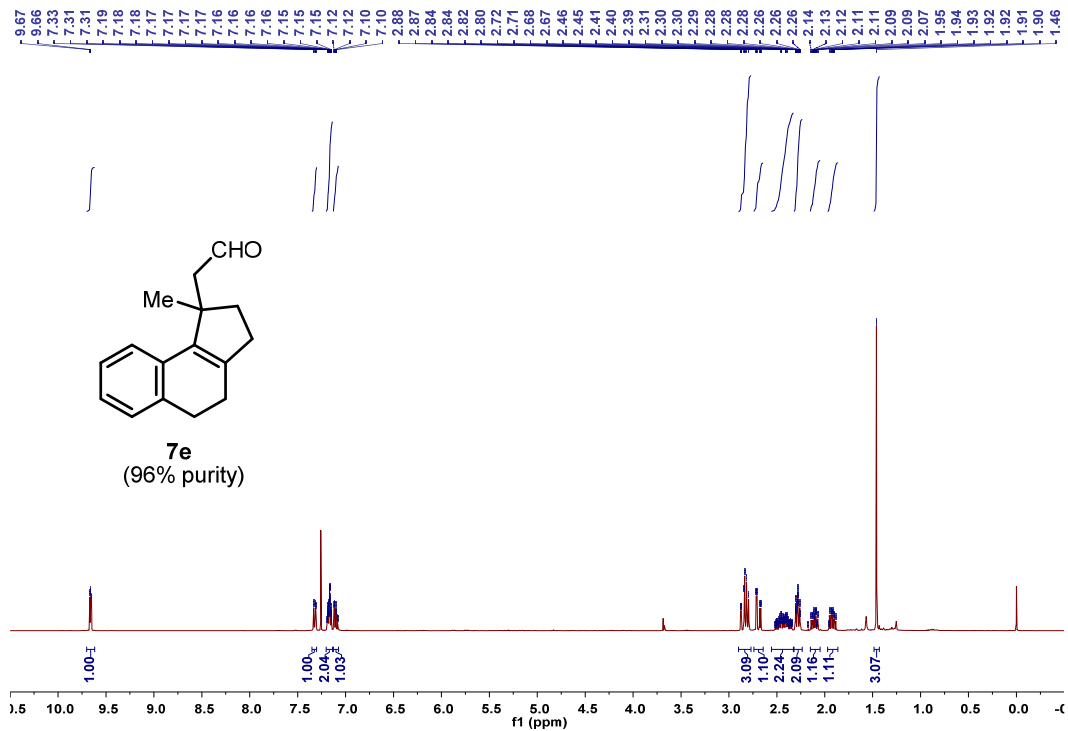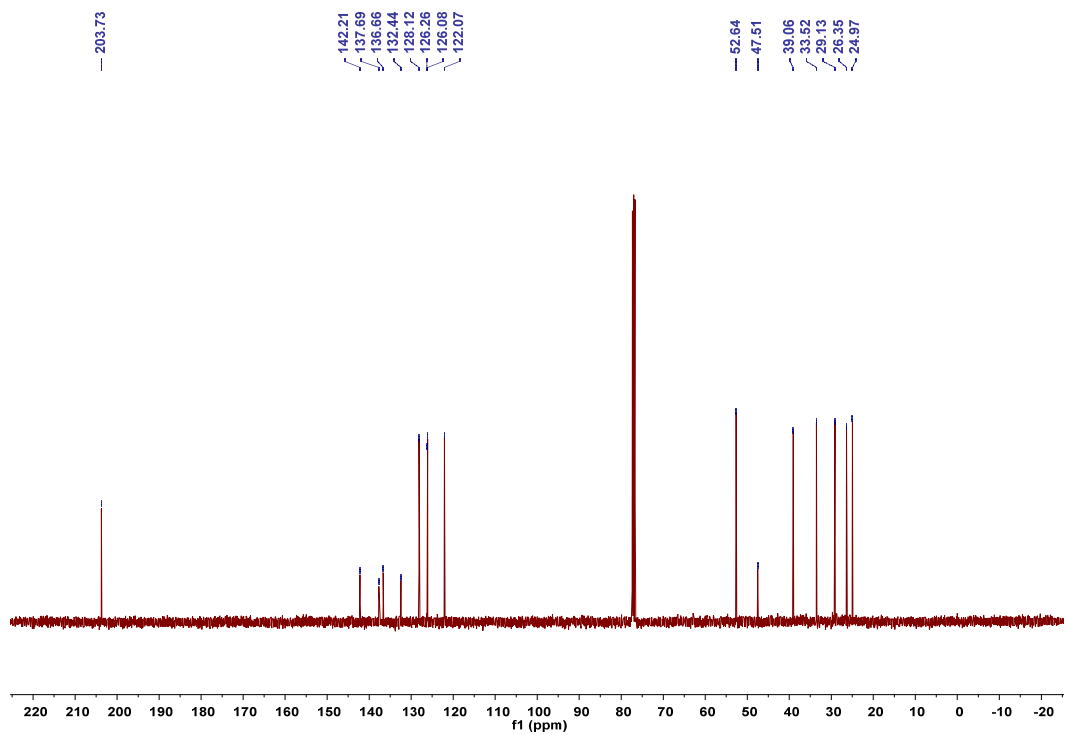

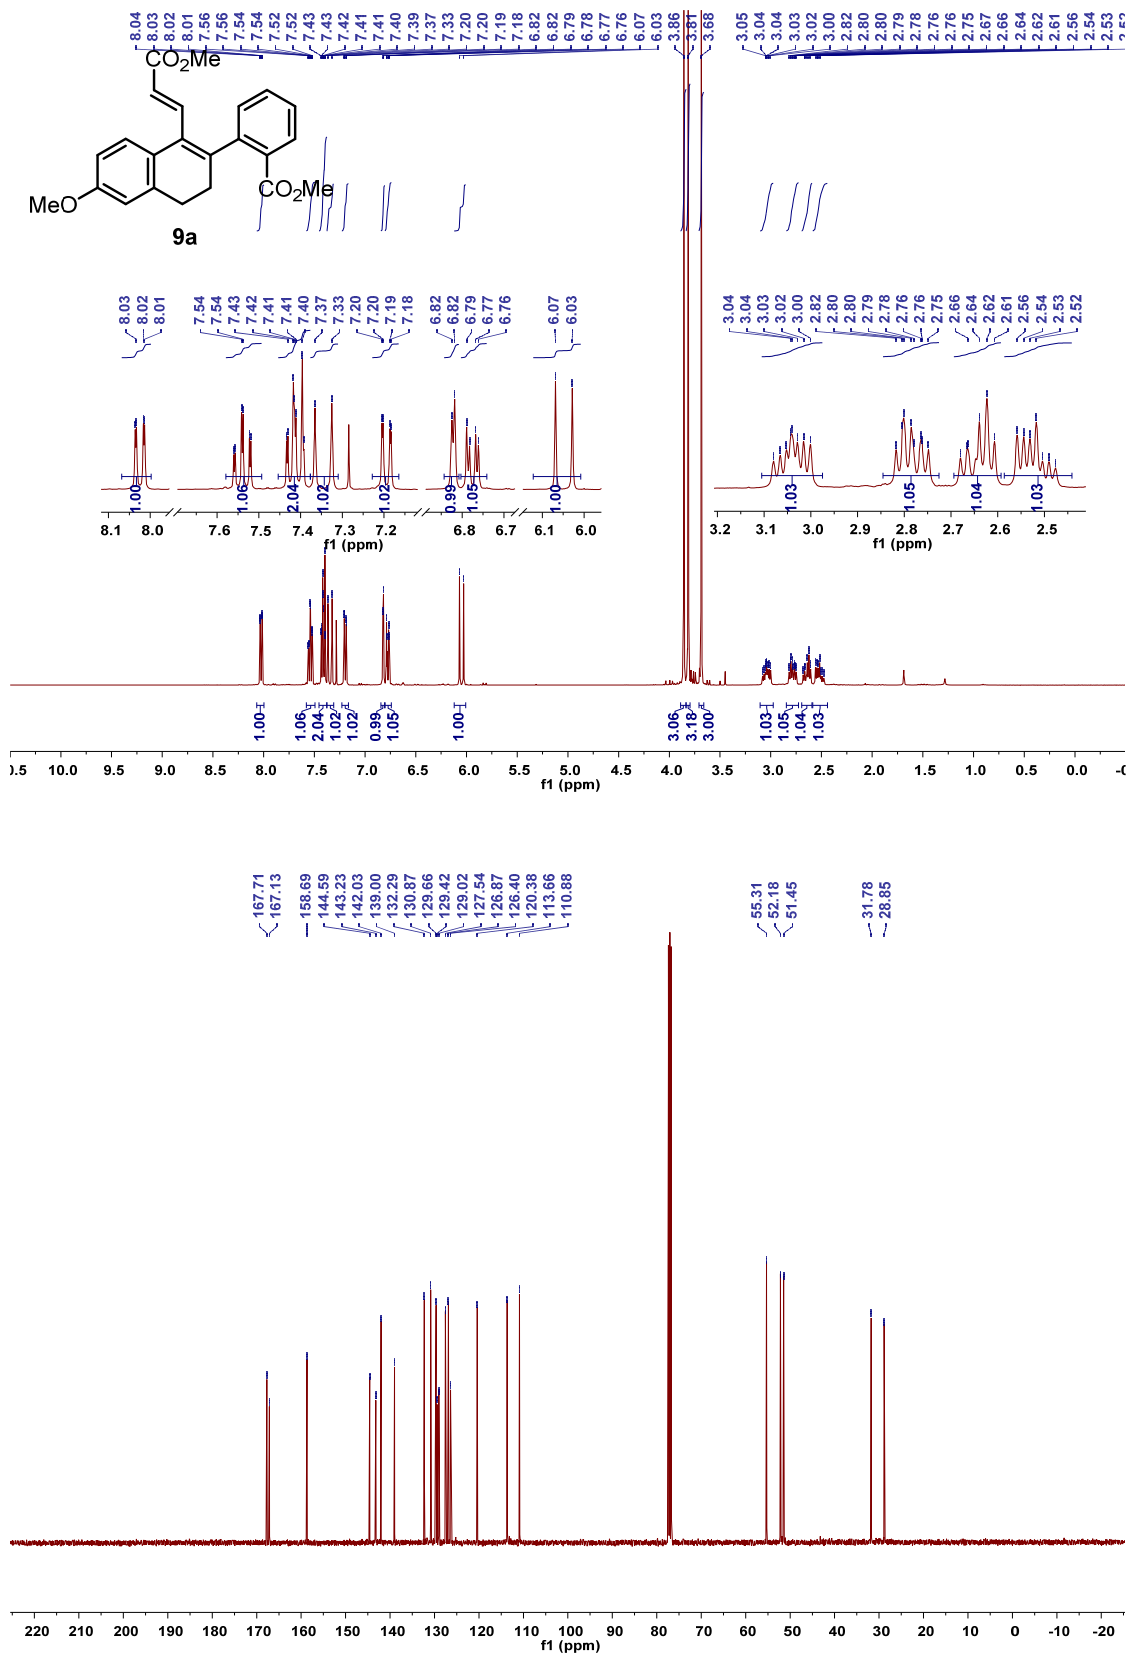

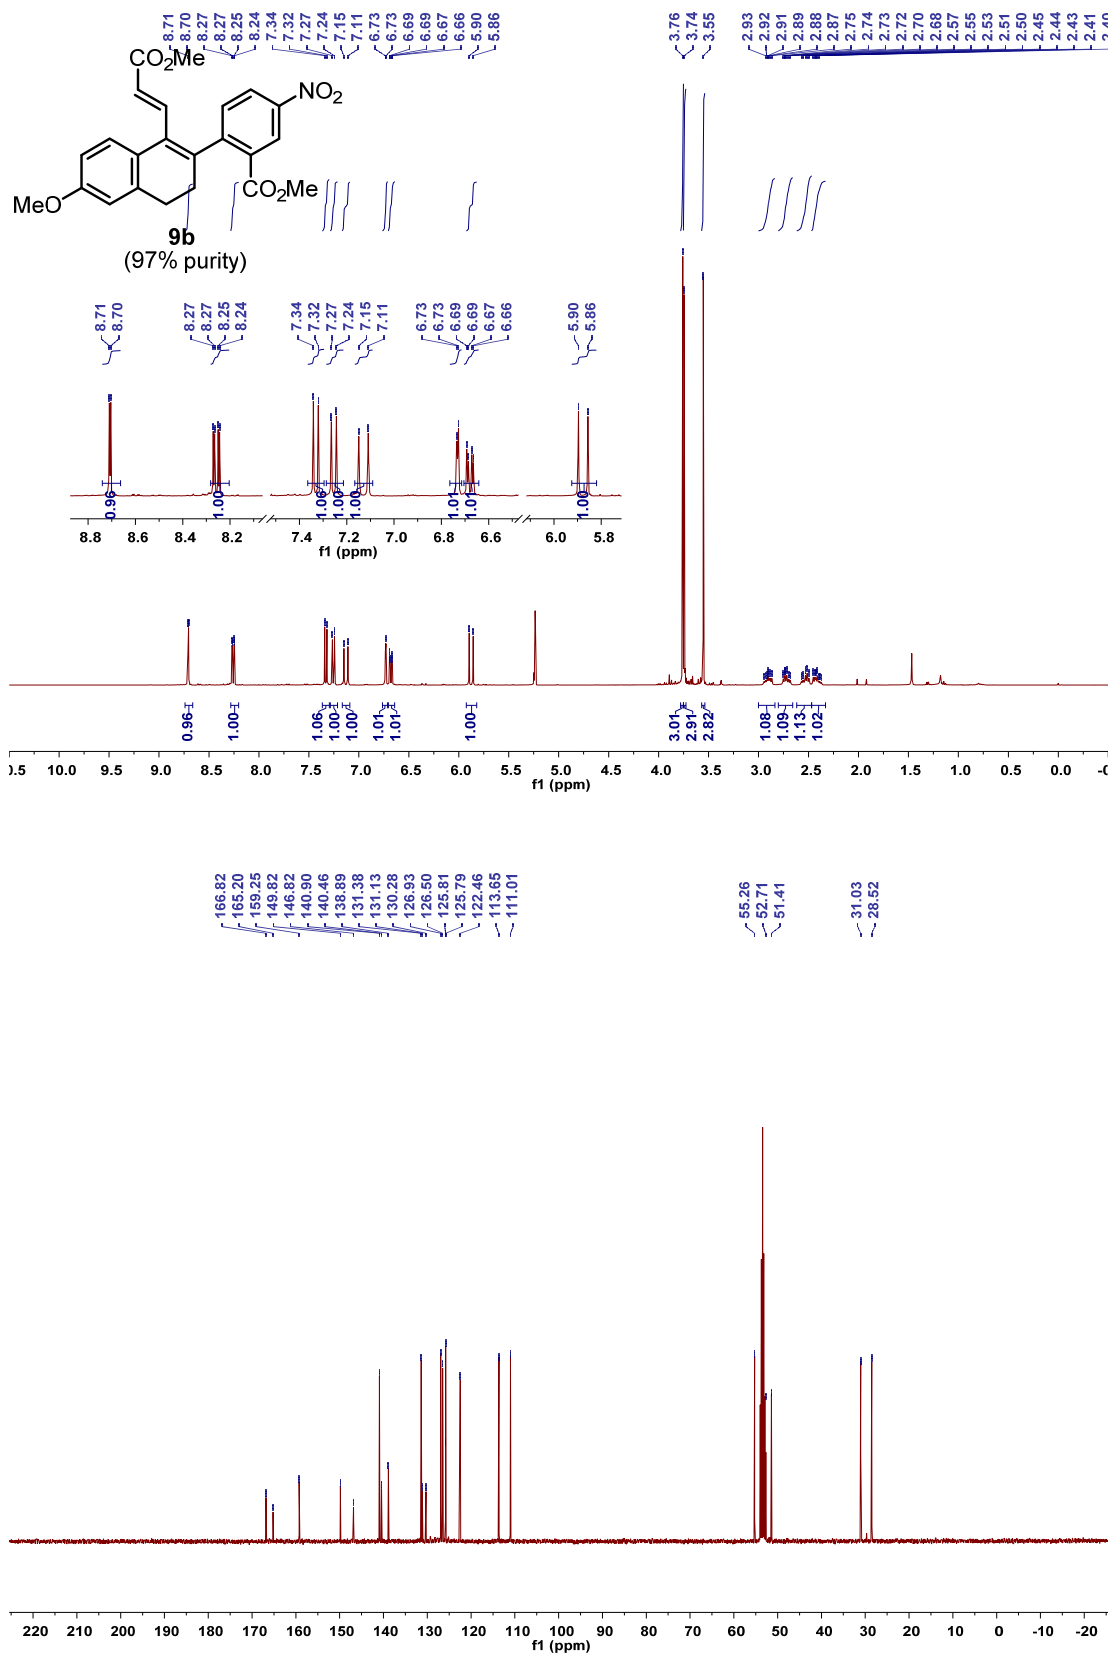

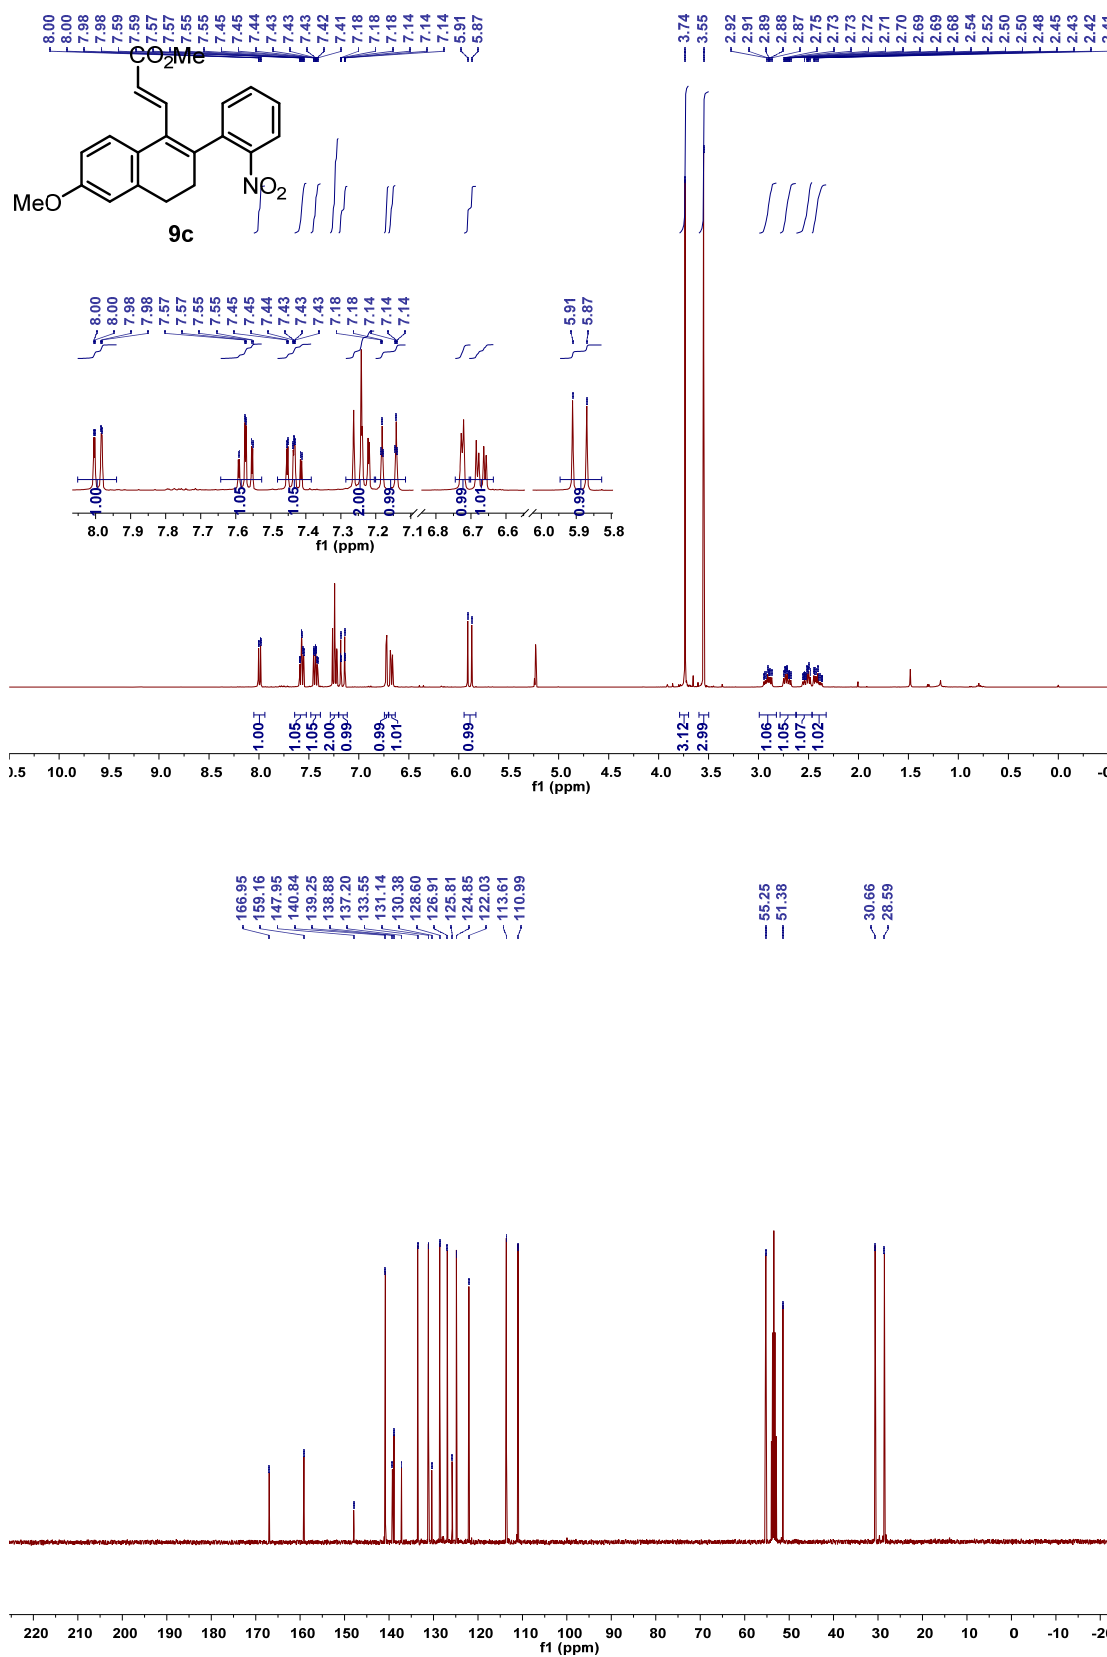

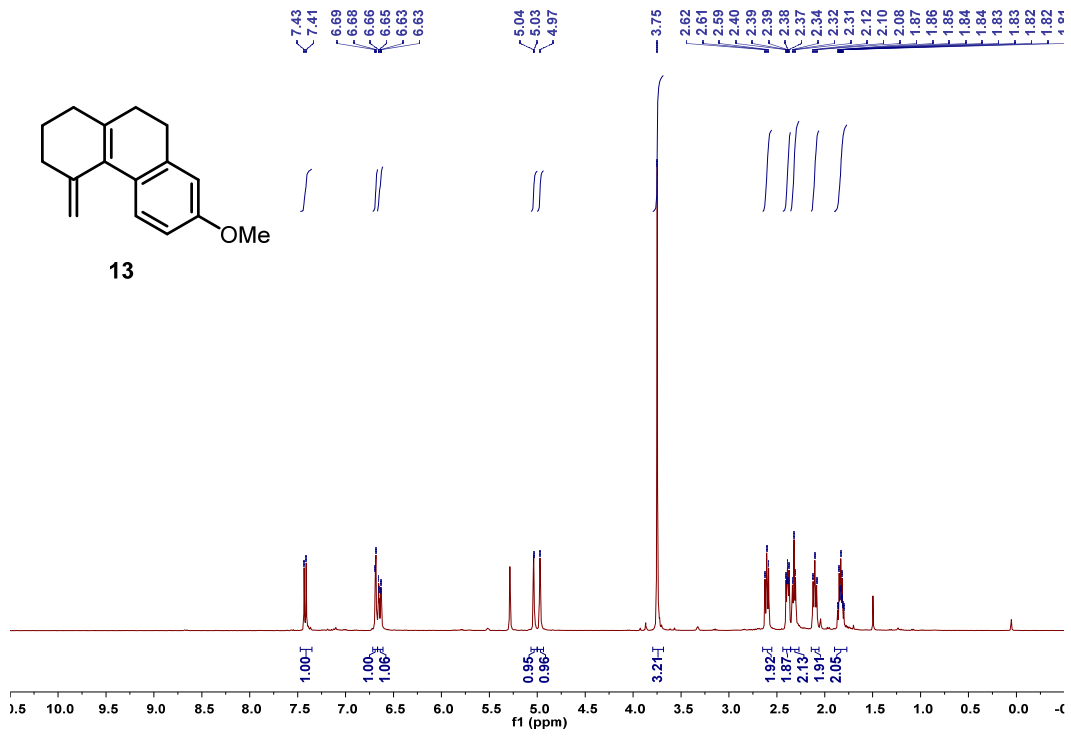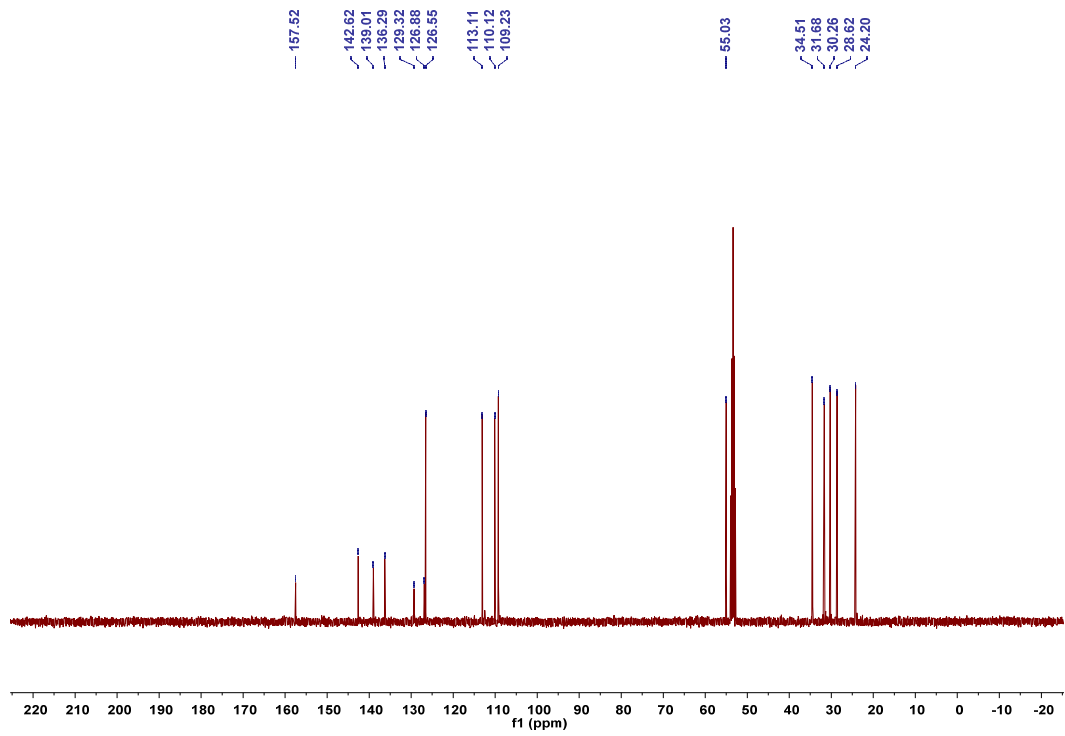

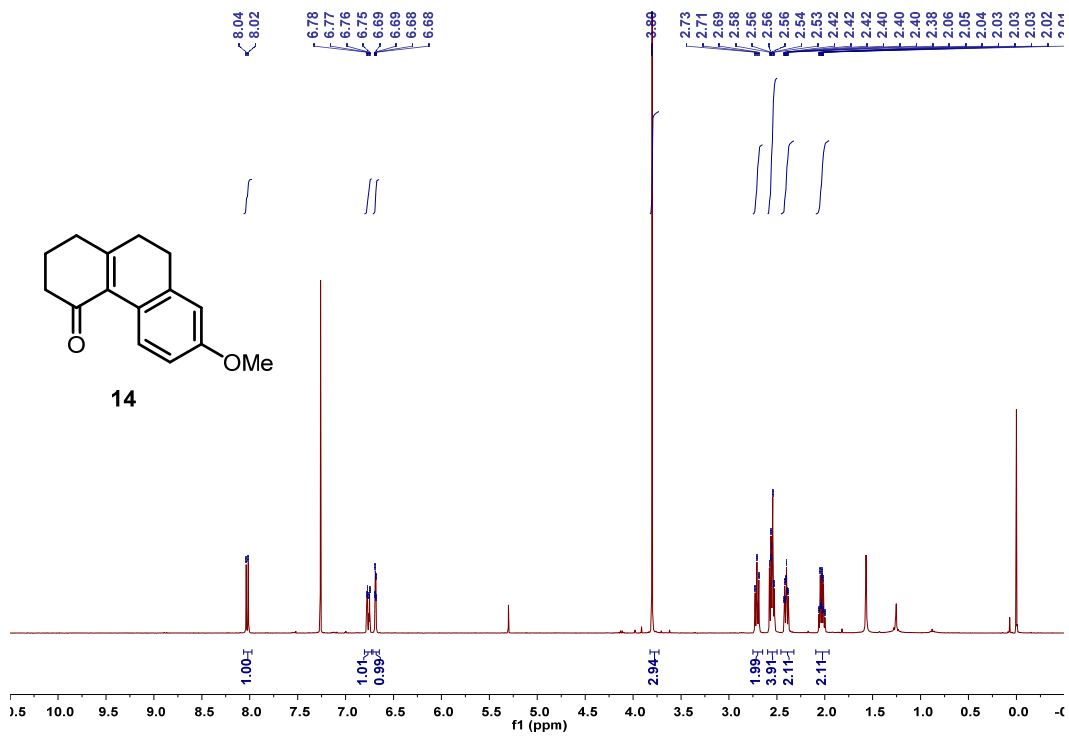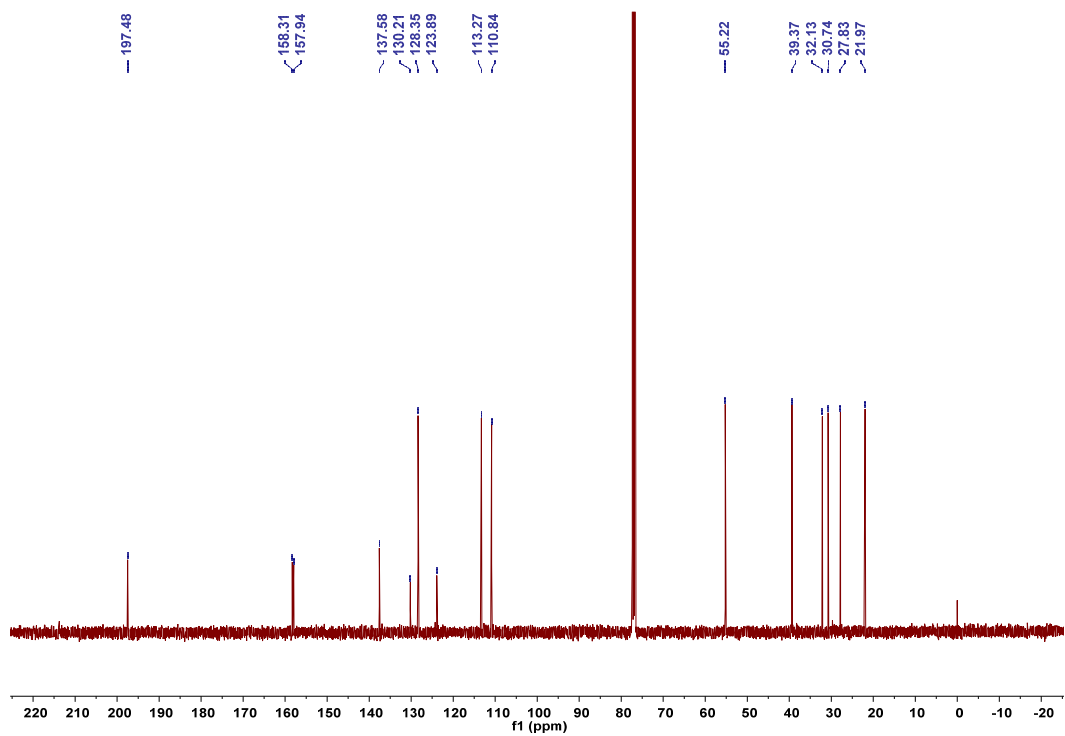

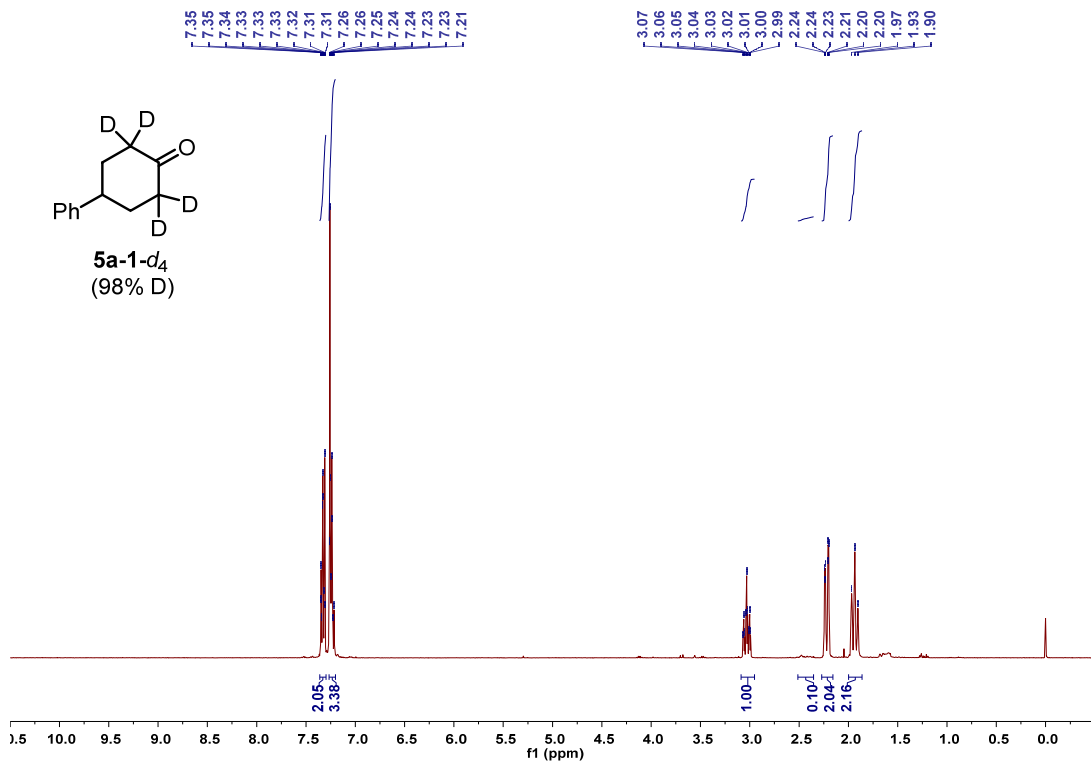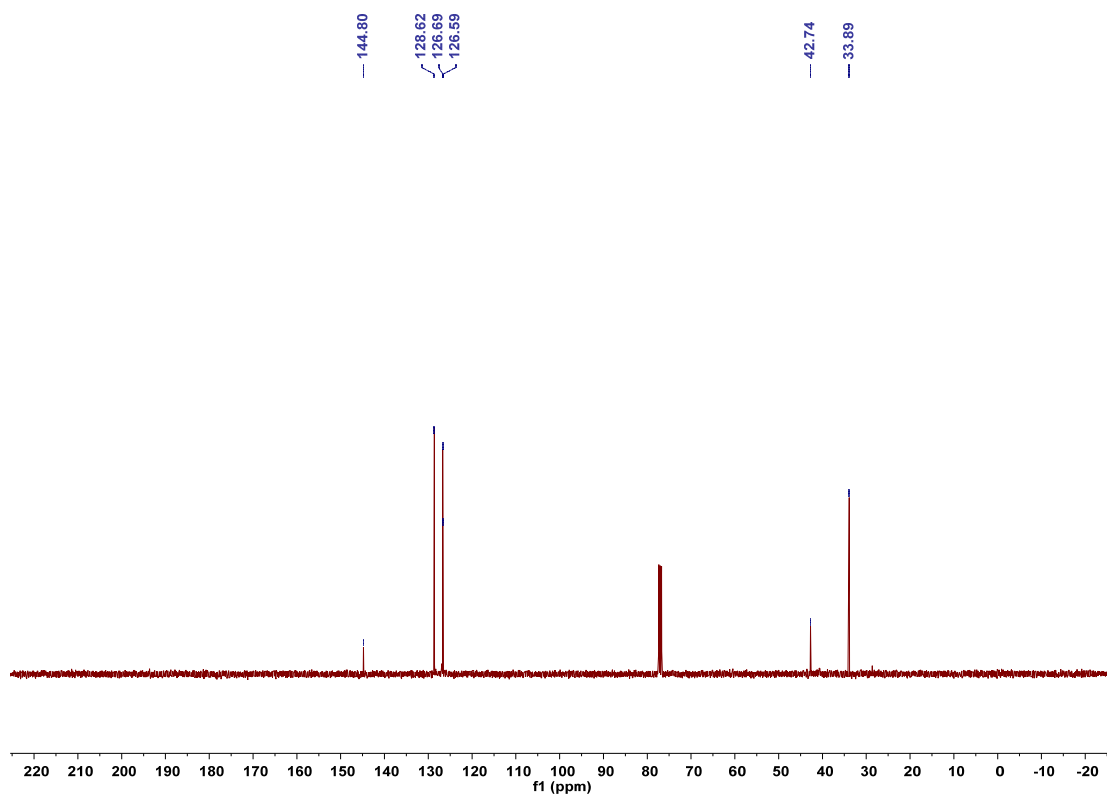

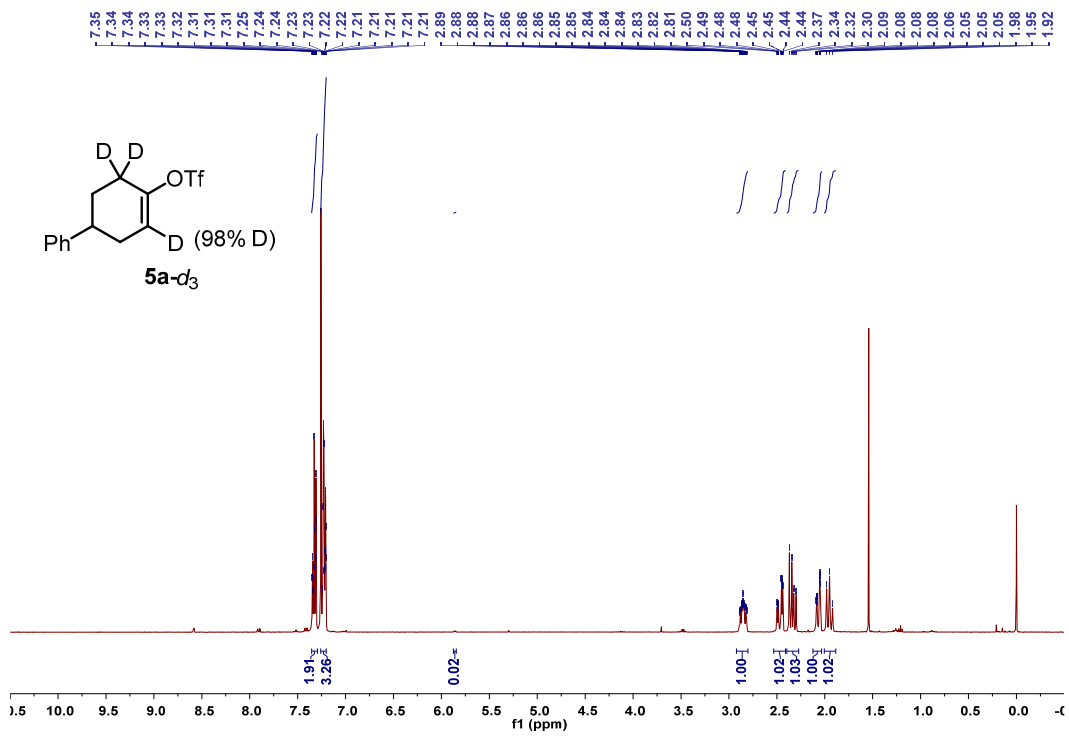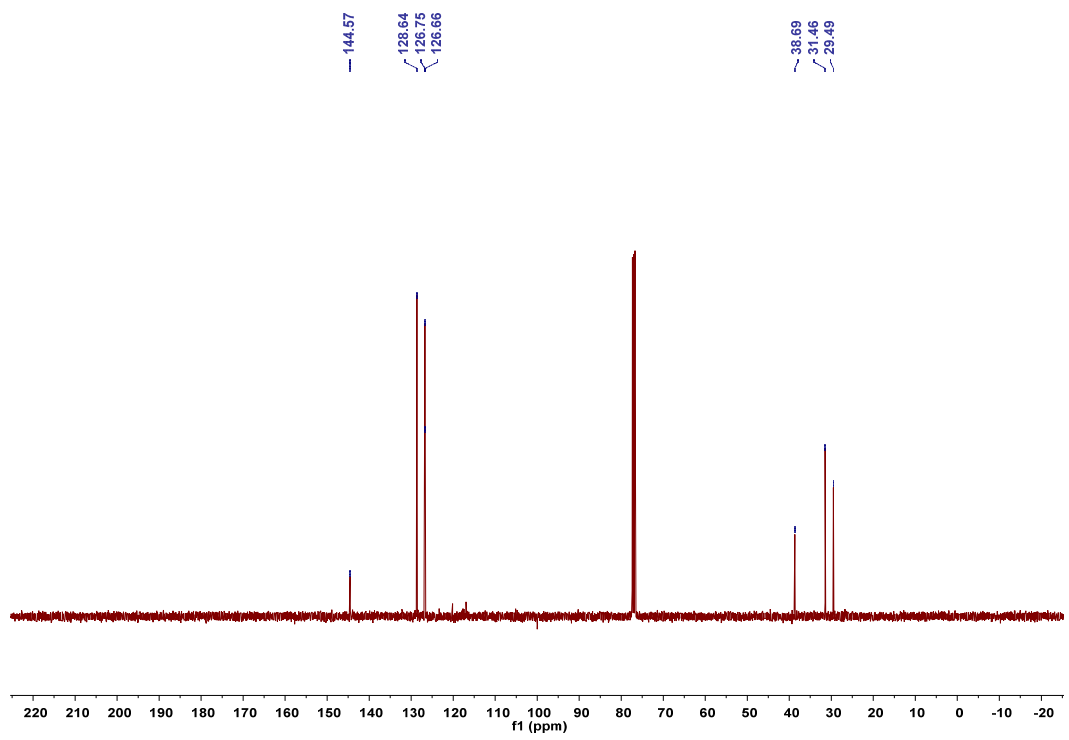



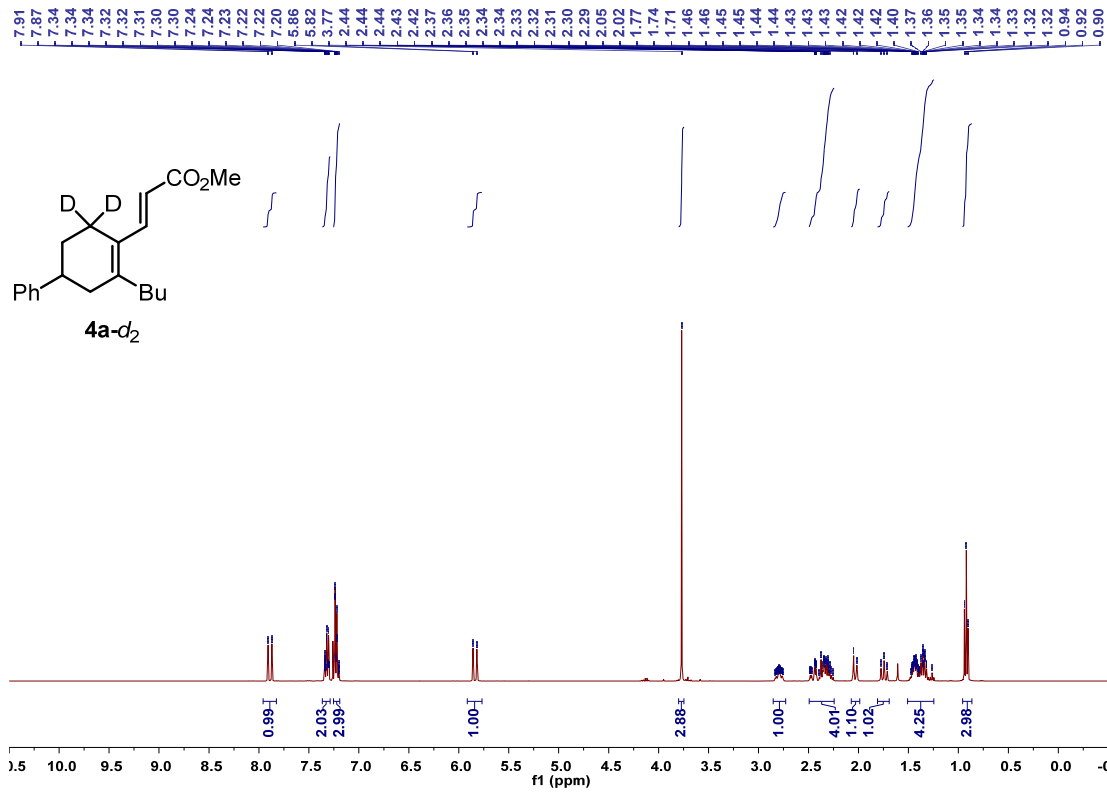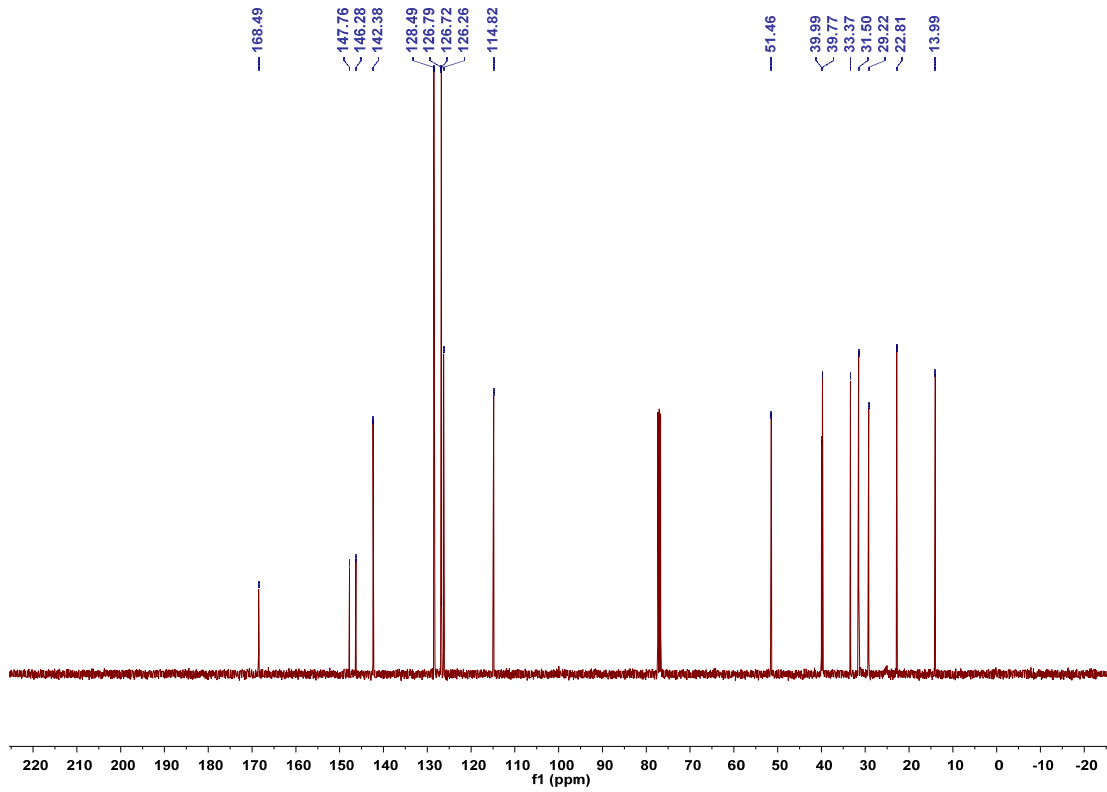

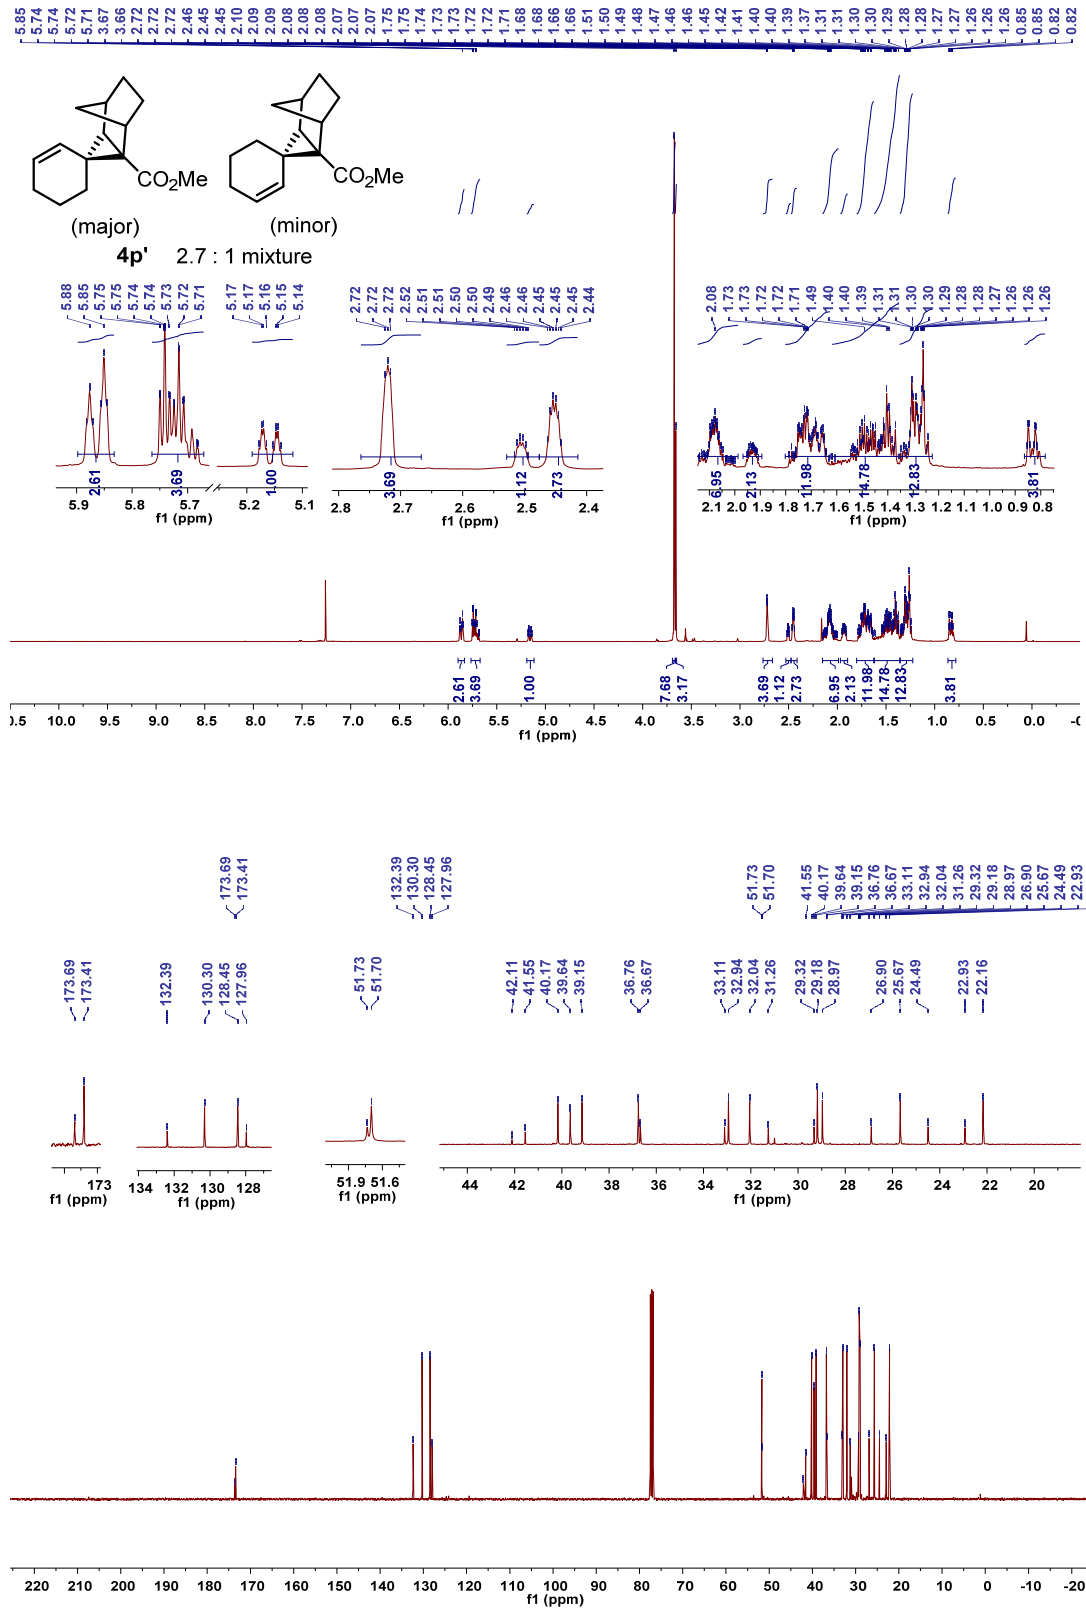

COSY of 4p'

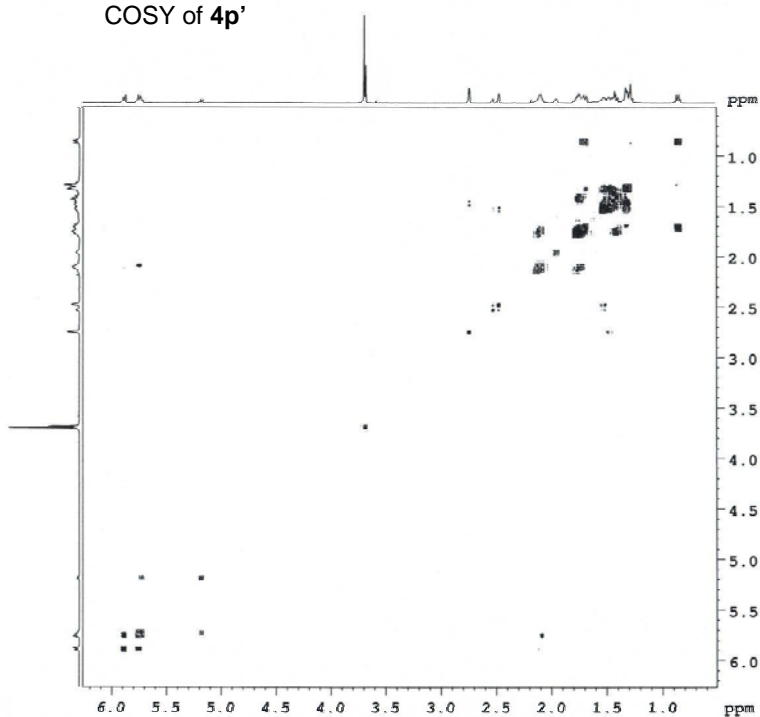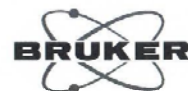

```

Current Data Parameters
NAME      W3-R-63-final
EXPNO    3
PROCNO   1

F2 - Acquisition Parameters
Date_    20190402
Time     20.48
INSTRUM  spect
PROBHD   5 mm F4BBO BB/
PULPROG  cosypprph
TD       32768
SOLVENT  CDCl3
NS       8
DS       4
SWH      2876.870 Hz
FIDRES   1.404722 Hz
AQ       0.3554254 sec
RG       655.65
RW       173.800 usec
DE       6.50 usec
TE       297.4 K
DQ       0.00014107 sec
D1       2.00000000 sec
D11      0.00000000 sec
D12      0.00000000 sec
D16      0.00000000 sec
RG1      0.00034760 sec

***** CHANNEL f1 *****
SFO1     499.871934 MHz
NUC1     1H
P1       18.00 usec
P2       20.00 usec
PLW1    18.20000000 W

***** GRADIENT CHANNEL *****
GPRAM1[1] SMSQ10.100
GPRAM1[2] SMSQ10.100
GP1      10.00 %
GP2      20.00 %
P16      1000.00 usec

F1 - Acquisition parameters
TD       128
SFO1     499.8717 MHz
FIDRES   22.475544 Hz
SW       5.755 ppm
F2MODE   States-TPPI

F2 - Processing parameters
SI       1024
SF       499.8700000 MHz
WDW      QFIRM
SSB      0
LB       0 Hz
GB       0
PC       0.60

F1 - Processing parameters
SI       1024
MC2      States-TPPI
SF       499.8700000 MHz
WDW      QFIRM
SSB      0
LB       0 Hz
GB       0
    
```

NOESY of 4p'

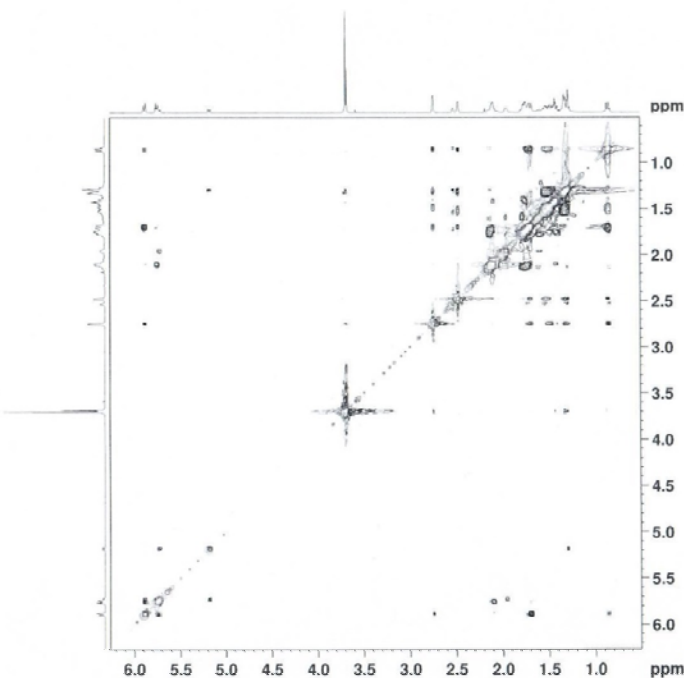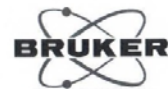

```

Current Data Parameters
NAME      W3-R-63-final
EXPNO    3
PROCNO   1

F2 - Acquisition Parameters
Date_    20190402
Time     21.45
INSTRUM  spect
PROBHD   5 mm F4BBO BB/
PULPROG  noesygq3dpo
TD       32768
SOLVENT  CDCl3
NS       8
DS       4
SWH      2876.870 Hz
FIDRES   1.404722 Hz
AQ       0.3554254 sec
RG       655.65
RW       173.800 usec
DE       6.50 usec
TE       297.4 K
DQ       0.00014107 sec
D1       2.00000000 sec
D11      1.95000005 sec
D12      0.00000000 sec
D16      0.00000000 sec
RG1      0.00034760 sec

***** CHANNEL f1 *****
SFO1     499.8716934 MHz
NUC1     1H
P1       18.00 usec
P2       20.00 usec
PLW1    18.20000000 W
PLW10   2.49970012 W

***** GRADIENT CHANNEL *****
GPRAM1[1] SMSQ10.100
GPRAM1[2] SMSQ10.100
GP1      10.00 %
GP2      20.00 %
P16      1000.00 usec

F1 - Acquisition parameters
TD       100
SFO1     499.8717 MHz
FIDRES   28.768700 Hz
SW       5.755 ppm
F2MODE   States-TPPI

F2 - Processing parameters
SI       1024
SF       499.8700000 MHz
WDW      QFIRM
SSB      0
LB       0 Hz
GB       0
PC       1.00

F1 - Processing parameters
SI       1024
MC2      States-TPPI
SF       499.8700000 MHz
WDW      QFIRM
SSB      0
LB       0 Hz
GB       0
    
```

## V. X-ray Data

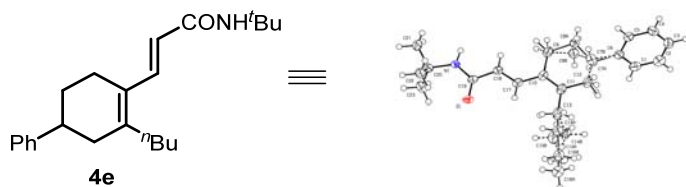

|                                         |                                                                |
|-----------------------------------------|----------------------------------------------------------------|
| Identification code                     | <b>4e</b> (CCDC # 1908383)                                     |
| Empirical formula                       | C <sub>23</sub> H <sub>33</sub> NO                             |
| Formula weight                          | 339.50                                                         |
| Temperature/K                           | 100(2)                                                         |
| Crystal system                          | orthorhombic                                                   |
| Space group                             | Pbcn                                                           |
| a/Å                                     | 20.2170(10)                                                    |
| b/Å                                     | 9.4653(4)                                                      |
| c/Å                                     | 22.0972(11)                                                    |
| $\alpha$ /°                             | 90                                                             |
| $\beta$ /°                              | 90                                                             |
| $\gamma$ /°                             | 90                                                             |
| Volume/Å <sup>3</sup>                   | 4228.5(3)                                                      |
| Z                                       | 8                                                              |
| $\rho_{\text{calc}}/\text{cm}^3$        | 1.067                                                          |
| $\mu/\text{mm}^{-1}$                    | 0.064                                                          |
| F(000)                                  | 1488.0                                                         |
| Crystal size/mm <sup>3</sup>            | 0.06 × 0.06 × 0.04                                             |
| Radiation                               | MoK $\alpha$ ( $\lambda$ = 0.71073)                            |
| 2 $\theta$ range for data collection/°  | 4.752 to 54.97                                                 |
| Index ranges                            | -24 ≤ h ≤ 26, -10 ≤ k ≤ 12, -25 ≤ l ≤ 28                       |
| Reflections collected                   | 22244                                                          |
| Independent reflections                 | 4611 [ $R_{\text{int}}$ = 0.0348, $R_{\text{sigma}}$ = 0.0361] |
| Data/restraints/parameters              | 4611/59/276                                                    |
| Goodness-of-fit on F <sup>2</sup>       | 1.028                                                          |
| Final R indexes [ $I \geq 2\sigma(I)$ ] | $R_1$ = 0.0491, $wR_2$ = 0.1091                                |
| Final R indexes [all data]              | $R_1$ = 0.0842, $wR_2$ = 0.1228                                |

One B-Alert: PLAT410\_Alert\_2\_B Type\_2 Test for short non-bonding intra H..H contacts. Author response: The atom H13D is included in the disordered *n*-butyl group. Because of low occupancy [22%] and thermal motion of the *n*-butyl group, the short contact of H17...H13D is unavoidable in the crystal.

## VI. References

- (1) Dong, Z.; Wang, J.; Ren, Z.; Dong, G. *Angew. Chem. Int. Ed.* **2015**, *54*, 12664-12668.
- (2) Wang, J.; Li, R.; Dong, Z.; Liu, P.; Dong, G. *Nat. Chem.* **2018**, *10*, 866-872.
- (3) La, D. S.; Sattely, E. S.; Ford, J. G.; Schrock, R. R.; Hoveyda, A. H. *J. Am. Chem. Soc.* **2001**, *123*, 7767-7778.
- (4) Li, R.; Dong, G. *Angew. Chem. Int. Ed.* **2018**, *57*, 1697-1701.
- (5) Yu, P.; Morandi, B. *Angew. Chem. Int. Ed.* **2017**, *56*, 15693-15697.
- (6) Lim, B. Y.; Jung, B. E.; Cho, C. G. *Org. Lett.* **2014**, *16*, 4492-4495.
- (7) Yue, L.; Du, J.; Ye, F.; Chen, Z.; Li, L.; Lian, F.; Zhang, B.; Zhang, Y.; Jiang, H.; Chen, K.; Li, Y.; Zhou, B.; Zhang, N.; Yang, Y.; Luo, C. *Org. Biomol. Chem.* **2016**, *14*, 8503-8519.
- (8) Rabal, O.; Sanchez-Arias, J. A.; Cuadrado-Tejedor, M.; de Miguel, I.; Perez-Gonzalez, M.; Garcia-Barroso, C.; Ugarte, A.; de Mendoza, A. E. H.; Saez, E.; Espelosin, M.; Ursua, S.; Tan, H. Z.; Wei, W.; Xu, M. S.; Garcia-Osta, A.; Oyarzabal, J. *Eur. J. Med. Chem.* **2018**, *150*, 506-524.
- (9) Olivares, A. M.; Weix, D. J. *J. Am. Chem. Soc.* **2018**, *140*, 2446-2449.
- (10) Pal, K. *Synthesis* **1995**, 1485-1487.
- (11) Su, X.; Huang, H.; Yuan, Y.; Li, Y. *Angew. Chem. Int. Ed.* **2017**, *56*, 1338-1341.
- (12) Wilson, K. L.; Murray, J.; Jamieson, C.; Watson, A. J. B. *Synlett* **2018**, *29*, 650-654.
- (13) Tsushima, K.; Araki, K.; Murai, A. *Chem. Lett.* **1989**, 1313-1316.
- (14) Kondo, K.; Sodeoka, M.; Shibasaki, M. *J. Org. Chem.* **1995**, *60*, 4322-4323.
- (15) Lee, J.; Snyder, J. K. *J. Org. Chem.* **1990**, *55*, 4995-5008.
- (16) Cho, E. J.; Buchwald, S. L. *Org. Lett.* **2011**, *13*, 6552-6555.
- (17) Hioki, Y.; Okano, K.; Mori, A. *Chem. Commun.* **2017**, *53*, 2614-2617.
- (18) Stokes, S. S.; Gowravaram, M.; Huynh, H.; Lu, M.; Mullen, G. B.; Chen, B.; Albert, R.; O'Shea, T. J.; Rooney, M. T.; Hu, H. Q.; Newman, J. V.; Mills, S. D. *Bioorg. Med. Chem. Lett.* **2012**, *22*, 85-89.
- (19) Kutsumura, N.; Niwa, K.; Saito, T. *Org. Lett.* **2010**, *12*, 3316-3319.
- (20) Lodewyk, M. W.; Siebert, M. R.; Tantillo, D. J. *Chem. Rev.* **2012**, *112*, 1839-1862.
- (21) Simmons, E. M.; Hartwig, J. F. *Angew. Chem. Int. Ed.* **2012**, *51*, 3066-3072.
- (22) Baba, K.; Tobisu, M.; Chatani, N. *Angew. Chem. Int. Ed.* **2013**, *52*, 11892-11895.
